# Supplementary material for: DNA hyper-methylation associated with schizophrenia may lead to breakdown of self-tolerance
Source: Research Square preprint supplement (doi:10.21203/rs.3.rs-645110/v1), 2021-07-12
Supplement: Supplementary file 2 [file 39f46177d66d075049597545.xlsx]

## Sheet: Table S3.1
DMS	chr	pos	strand	Name	Probe_rs	Probe_maf	CpG_rs	CpG_maf	SBE_rs	SBE_maf	Islands_Name	Relation_to_Island	UCSC_RefGene_Name	UCSC_RefGene_Accession	UCSC_RefGene_Group	DMR	Enhancer	HMM_Island	Regulatory_Feature_Name	Regulatory_Feature_Group	logFC	AveExpr	t	P.Value	adj.P.Value	B
cg14341177	chr9	95475787	+	cg14341177	NA	NA	NA	NA	NA	NA	chr9:95477296-95477708	N_Shore	BICD2;BICD2	NM_015250;NM_001003800	Body;3'UTR			9:94515572-94515643			-4.17084	-0.385409	-8.48334	6.28795e-14	1.41855e-11	21.2489
cg13978347	chr9	120140243	+	cg13978347	NA	NA	NA	NA	NA	NA		OpenSea	ASTN2;ASTN2;ASTN2	NM_198186;NM_014010;NM_198187	Body;Body;Body						2.66595	0.856392	5.81179	5.10134e-08	1.59451e-06	8.05146
cg25456593	chr11	70672858	-	cg25456593	NA	NA	NA	NA	NA	NA	chr11:70672834-70673055	Island	SHANK2	NM_012309	Body			11:70350277-70350679			-2.94869	0.814589	-5.85267	4.21313e-08	1.36547e-06	8.23586
cg14594459	chr8	110374675	-	cg14594459	NA	NA	NA	NA	NA	NA	chr8:110374552-110374793	Island	PKHD1L1	NM_177531	TSS200		TRUE	8:110443745-110443953			-2.1898	-0.398693	-8.76411	1.3748e-14	3.77122e-12	22.7287
cg04509559	chr14	69864994	+	cg04509559	NA	NA	NA	NA	NA	NA	chr14:69864713-69865073	Island	ERH;ERH;SLC39A9	NM_004450;NM_004450;NM_018375	1stExon;5'UTR;TSS1500			14:68934436-68934866	14:69864616-69865833	Promoter_Associated	-1.61889	-0.9692	-13.719	1.95583e-26	1.61093e-22	49.2466
cg16526287	chr6	15524865	+	cg16526287	NA	NA	NA	NA	NA	NA		OpenSea	DTNBP1;DTNBP1;DTNBP1	NM_183041;NM_183040;NM_032122	Body;Body;Body			6:15632693-15632845			-1.57317	3.03105	-6.37568	3.44049e-09	1.71418e-07	10.6553
cg14787155	chr3	108308533	-	cg14787155	rs9810998	0.016513	NA	NA	NA	NA	chr3:108308227-108308604	Island	DZIP3;DZIP3;KIAA1524	NM_014648;NM_014648;NM_020890	1stExon;5'UTR;TSS200			3:109790598-109791476	3:108307498-108309243	Promoter_Associated	-1.57004	-0.769689	-16.9897	7.20336e-34	3.02587e-28	65.7501
cg08340572	chr15	76196139	-	cg08340572	NA	NA	NA	NA	NA	NA	chr15:76196103-76196950	Island	FBXO22;FBXO22	NM_147188;NM_012170	TSS200;TSS200			15:73983159-73984005	15:76195924-76196801	Promoter_Associated_Cell_type_specific	-1.52662	-1.76637	-14.1822	1.6163e-27	1.88597e-23	51.6596
cg06009330	chr2	70485380	-	cg06009330	NA	NA	NA	NA	NA	NA	chr2:70485231-70485679	Island	PCYOX1	NM_016297	1stExon			2:70338649-70339295	2:70484905-70486302	Promoter_Associated	-1.51282	-1.4819	-14.8074	5.77272e-29	1.34717e-24	54.8802
cg14592024	chr15	48624386	-	cg14592024	NA	NA	NA	NA	NA	NA	chr15:48623185-48624651	Island	DUT;DUT;DUT;DUT	NM_001025249;NM_001948;NM_001025248;NM_001948	5'UTR;1stExon;Body;5'UTR			15:46410410-46411968			-1.4966	-2.49179	-12.2463	6.09526e-23	1.91075e-19	41.4444
cg22352273	chr2	238969464	+	cg22352273	rs186066278	0.0279	NA	NA	NA	NA	chr2:238969080-238969919	Island	SCLY	NM_016510	TSS200			2:238633774-238635185	2:238969250-238969742	Promoter_Associated	-1.48276	-1.11781	-16.1401	5.46912e-32	7.65793e-27	61.5906
cg24141233	chr1	212781895	-	cg24141233	NA	NA	NA	NA	NA	NA	chr1:212780151-212783086	Island	ATF3;ATF3;ATF3	NM_001040619;NM_001674;NM_001030287	TSS200;TSS200;5'UTR			1:210847911-210849709	1:212781098-212782209	Promoter_Associated	-1.43334	-2.05274	-14.1186	2.27275e-27	2.38676e-23	51.3299
cg02711976	chr1	36023590	+	cg02711976	NA	NA	NA	NA	NA	NA	chr1:36022680-36023834	Island	NCDN;NCDN;KIAA0319L;NCDN;NCDN	NM_014284;NM_001014839;NM_024874;NM_014284;NM_001014841	1stExon;5'UTR;TSS1500;5'UTR;5'UTR			1:35795140-35796209			-1.40813	-1.24008	-12.8927	1.75043e-24	8.35558e-21	44.8905
cg12065531	chr6	33176293	-	cg12065531	NA	NA	NA	NA	NA	NA	chr6:33175561-33176387	Island	RING1;RING1	NM_002931;NM_002931	1stExon;5'UTR			6:33283570-33284592	6:33175424-33176941	Promoter_Associated	-1.40144	-1.548	-14.3049	8.37771e-28	1.13522e-23	52.2952
cg21107223	chr15	75182455	-	cg21107223	NA	NA	NA	NA	NA	NA	chr15:75182262-75182622	Island	MPI	NM_002435	Body			15:72969316-72969627	15:75181535-75182957	Promoter_Associated	-1.39415	-2.14238	-12.3195	4.07255e-23	1.36858e-19	41.836
cg12697442	chr11	101981167	-	cg12697442	NA	NA	NA	NA	NA	NA	chr11:101980632-101982330	Island	YAP1;YAP1	NM_001130145;NM_006106	TSS200;TSS200			11:101485843-101487952			-1.38849	-0.468604	-12.6634	6.14928e-24	2.46009e-20	43.6714
cg16605745	chr12	48099745	+	cg16605745	NA	NA	NA	NA	NA	NA	chr12:48099317-48099905	Island	RPAP3;RPAP3;RPAP3;RPAP3;RPAP3;RPAP3	NM_001146075;NM_001146076;NM_024604;NM_001146075;NM_001146076;NM_024604	5'UTR;1stExon;5'UTR;1stExon;5'UTR;1stExon			12:46385542-46386157	12:48099018-48100579	Promoter_Associated	-1.38314	-1.14662	-12.3946	2.69367e-23	9.75444e-20	42.2374
cg19423543	chr5	172655948	+	cg19423543	rs3095873	0.278808	NA	NA	NA	NA	chr5:172655840-172656202	Island				DMR		5:172588447-172588586			-1.34688	-2.0326	-12.8576	2.12182e-24	9.68807e-21	44.7039
cg09996344	chr7	66093369	-	cg09996344	NA	NA	NA	NA	NA	NA	chr7:66093348-66094174	Island	KCTD7;KCTD7	NM_153033;NM_001167961	TSS1500;TSS1500			7:65730709-65731754	7:66093001-66094672	Promoter_Associated	-1.3407	-2.25306	-14.6531	1.30893e-28	2.49925e-24	54.0895
cg10684905	chr12	2999782	+	cg10684905	NA	NA	NA	NA	NA	NA	chr12:2999665-3000638	Island	TULP3;TULP3	NM_003324;NM_001160408	TSS1500;TSS1500			12:2869934-2870991	12:2998937-3000672	Promoter_Associated	-1.32997	-2.04502	-13.6524	2.80443e-26	2.10364e-22	48.8976
cg13051728	chr14	68086375	+	cg13051728	rs17104512	0.040167	NA	NA	NA	NA	chr14:68086277-68086957	Island	ARG2	NM_001172	TSS1500			14:67155948-67156734	14:68086127-68086806	Promoter_Associated	-1.27366	-2.55645	-10.2387	4.13298e-18	3.26109e-15	30.6248
cg04879506	chr3	9773229	+	cg04879506	NA	NA	NA	NA	NA	NA	chr3:9773066-9773911	Island	BRPF1;BRPF1	NM_004634;NM_001003694	TSS1500;TSS1500			3:9747738-9749248	3:9772387-9773761	Promoter_Associated	-1.27055	-1.99815	-13.8473	9.78311e-27	8.74369e-23	49.9173
cg17528648	chr5	38846100	+	cg17528648	rs2292017	0.091022	NA	NA	NA	NA	chr5:38845502-38846476	Island	OSMR;OSMR;OSMR;OSMR	NM_001168355;NM_001168355;NM_003999;NM_003999	5'UTR;1stExon;1stExon;5'UTR			5:38881298-38882298			-1.26242	-1.86253	-13.0966	5.74705e-25	3.17648e-21	45.9708
cg14295958	chr14	24025576	-	cg14295958	NA	NA	NA	NA	NA	NA	chr14:24025006-24025577	Island	THTPA;THTPA;THTPA;THTPA	NM_001126339;NM_024328;NR_023314;NM_024328	5'UTR;5'UTR;Body;1stExon			14:23094847-23095453	14:24024767-24026504	Promoter_Associated	-1.23946	-1.96734	-13.2941	1.95891e-25	1.26595e-21	47.0142
cg05062446	chr1	219347252	-	cg05062446	NA	NA	NA	NA	NA	NA	chr1:219347109-219347572	Island	LYPLAL1	NM_138794	1stExon			1:217413733-217414126	1:219346535-219348350	Promoter_Associated	-1.23485	-2.67705	-13.8247	1.10509e-26	9.47364e-23	49.7993
cg08616760	chr5	178157801	-	cg08616760	rs71611460	0.221461	NA	NA	NA	NA	chr5:178157189-178157826	Island	ZNF354A	NM_005649	TSS200			5:178089808-178090569	5:178157287-178158428	Promoter_Associated	-1.22689	-0.409897	-12.3792	2.93169e-23	1.04364e-19	42.1552
cg16645584	chr1	59247487	-	cg16645584	NA	NA	NA	NA	NA	NA	chr1:59247461-59250940	Island	JUN;JUN	NM_002228;NM_002228	3'UTR;1stExon			1:59020050-59020256	1:59247171-59247730	Promoter_Associated_Cell_type_specific	-1.22171	-2.48101	-10.4313	1.42042e-18	1.35554e-15	31.6646
cg14284424	chr9	132199267	-	cg14284424	rs116717054	0.011729	NA	NA	NA	NA	chr9:132199361-132199984	N_Shore					TRUE	9:131238962-131239450	9:132199032-132200828	Unclassified	-1.21184	-1.75073	-11.4117	6.15836e-21	1.17055e-17	36.9586
cg13849454	chr9	14348844	+	cg13849454	NA	NA	NA	NA	NA	NA	chr9:14348684-14349074	Island				RDMR		9:14338399-14339074			-1.21045	-2.12732	-12.2917	4.74748e-23	1.51079e-19	41.6871
cg23623667	chr11	2465485	+	cg23623667	NA	NA	NA	NA	NA	NA	chr11:2465171-2465648	Island	KCNQ1	NM_000218	TSS1500			11:2421748-2423521			-1.20352	0.0659917	-12.9833	1.06706e-24	5.46628e-21	45.3706
cg20095036	chr4	153456176	-	cg20095036	NA	NA	NA	NA	NA	NA	chr4:153456108-153457843	Island	FBXW7	NM_033632	TSS200			4:153675530-153677348			-1.19408	-2.24293	-12.8694	1.98884e-24	9.18064e-21	44.7667
cg11878675	chr2	74211845	-	cg11878675	NA	NA	NA	NA	NA	NA	chr2:74211214-74212314	Island						2:74064692-74066240	2:74211488-74211912	Promoter_Associated	-1.18754	-1.90076	-11.3432	9.00414e-21	1.63031e-17	36.5891
cg05351078	chr10	45455109	-	cg05351078	NA	NA	NA	NA	NA	NA	chr10:45455239-45455474	N_Shore	RASSF4	NM_032023	TSS200		TRUE	10:44774839-44775473	10:45454072-45455841	Promoter_Associated	-1.18702	-1.84141	-9.99742	1.57249e-17	1.06368e-14	29.3238
cg00127505	chr10	131763820	-	cg00127505	NA	NA	NA	NA	NA	NA	chr10:131761169-131771696	Island						10:131653778-131653851			-1.18602	-1.28088	-11.4665	4.54404e-21	8.87808e-18	37.2542
cg16110940	chr22	21400158	-	cg16110940	NA	NA	NA	NA	NA	NA	chr22:21399979-21400270	Island	LOC400891	NR_027006	TSS200			22:19729990-19730467	22:21399528-21400423	Unclassified	-1.18393	-2.34404	-10.4912	1.0188e-18	1.00696e-15	31.988
cg03235119	chr5	176449645	+	cg03235119	NA	NA	NA	NA	NA	NA	chr5:176449499-176450115	Island	ZNF346	NM_012279	TSS200			5:176382071-176382768	5:176448998-176450869	Promoter_Associated	-1.18192	-3.04987	-11.8032	7.04436e-22	1.66241e-18	39.0665
cg22380533	chr19	55690741	+	cg22380533	rs11672000	0.117138	NA	NA	NA	NA	chr19:55690182-55691623	Island	SYT5	NM_003180	5'UTR	DMR	TRUE	19:60382019-60383580	19:55690122-55692080	Promoter_Associated	-1.18105	-2.73446	-14.6141	1.61003e-28	2.81798e-24	53.8894
cg24613083	chr17	59539715	-	cg24613083	NA	NA	NA	NA	NA	NA	chr17:59539362-59539834	Island	TBX4	NM_018488	Body		TRUE	17:56894369-56894648			-1.17609	-0.277547	-11.3783	7.41279e-21	1.38393e-17	36.7783
cg24452069	chr19	4867631	+	cg24452069	rs262560	0.092855	NA	NA	NA	NA		OpenSea	PLIN3;PLIN3;PLIN3;PLIN3;PLIN3;PLIN3	NM_005817;NM_001164189;NM_005817;NM_001164194;NM_001164189;NM_001164194	5'UTR;1stExon;1stExon;5'UTR;5'UTR;1stExon			19:4818327-4819080	19:4866531-4868189	Promoter_Associated	-1.16447	-3.04615	-10.6205	4.97171e-19	5.43864e-16	32.6864
cg07705810	chr5	16936470	+	cg07705810	NA	NA	NA	NA	NA	NA	chr5:16936753-16936957	N_Shore	MYO10	NM_012334	TSS200			5:16988389-16989957	5:16936449-16936707	Unclassified	-1.16424	-1.37641	-15.2294	6.23133e-30	2.85595e-25	57.0288
cg04864609	chr17	46178915	-	cg04864609	NA	NA	NA	NA	NA	NA	chr17:46178149-46178943	Island	CBX1;CBX1	NM_001127228;NM_006807	TSS200;TSS1500			17:43532940-43533942	17:46178210-46179131	Promoter_Associated	-1.1528	-0.861379	-10.4053	1.6406e-18	1.52544e-15	31.5243
cg24449302	chr15	66679100	+	cg24449302	rs77540803	0.037541	NA	NA	NA	NA	chr15:66678895-66679963	Island	MAP2K1	NM_002755	TSS200			15:64465950-64467017	15:66678648-66680556	Promoter_Associated	-1.14886	-0.648783	-14.2279	1.26527e-27	1.56322e-23	51.8965
cg21620778	chr2	175548020	-	cg21620778	NA	NA	NA	NA	NA	NA	chr2:175546862-175547880	S_Shore	WIPF1	NM_001077269	TSS1500	DMR		2:175255084-175256281			-1.14417	-1.46572	-11.7877	7.67208e-22	1.77075e-18	38.9836
cg11708118	chr12	6862968	-	cg11708118	NA	NA	NA	NA	NA	NA	chr12:6862672-6862989	Island	MLF2;MLF2	NR_026581;NM_005439	TSS1500;TSS1500				12:6862074-6863186	Promoter_Associated	-1.14395	-1.25763	-12.0393	1.91029e-22	5.1111e-19	40.3347
cg14757344	chr21	45209507	+	cg14757344	NA	NA	NA	NA	NA	NA	chr21:45209221-45209880	Island	RRP1;RRP1	NM_003683;NM_003683	1stExon;5'UTR			21:44033650-44034331	21:45208890-45210213	Promoter_Associated	-1.14305	-3.09629	-15.2631	5.22198e-30	2.74196e-25	57.1992
cg01994308	chr8	57122990	+	cg01994308	NA	NA	NA	NA	NA	NA	chr8:57123572-57124997	N_Shore	PLAG1;CHCHD7;CHCHD7;CHCHD7;PLAG1;CHCHD7;PLAG1;CHCHD7;CHCHD7	NM_001114635;NM_001011670;NM_024300;NM_001011667;NM_002655;NM_001011669;NM_001114634;NM_001011671;NM_001011668	5'UTR;TSS1500;TSS1500;TSS1500;5'UTR;TSS1500;5'UTR;TSS1500;TSS1500			8:57285529-57285583			-1.13481	0.296108	-11.6929	1.29643e-21	2.88138e-18	38.4736
cg00456086	chr3	197283111	-	cg00456086	NA	NA	NA	NA	NA	NA	chr3:197281605-197283128	Island	BDH1;BDH1;BDH1	NM_203314;NM_004051;NM_203315	TSS1500;TSS1500;5'UTR			3:198765761-198767525			-1.12926	-1.28876	-13.3401	1.5258e-25	1.00146e-21	47.2564
cg07089783	chr10	31607955	-	cg07089783	NA	NA	NA	NA	NA	NA	chr10:31607227-31610094	Island	ZEB1;ZEB1;ZEB1;ZEB1;LOC220930	NR_024286;NM_030751;NR_024287;NR_024285;NR_024284	Body;TSS200;Body;Body;Body			10:31647156-31649926	10:31607926-31608607	Promoter_Associated	-1.12416	-0.222134	-14.0844	2.73112e-27	2.73154e-23	51.1522
cg07689821	chr6	33290736	+	cg07689821	NA	NA	NA	NA	NA	NA	chr6:33290370-33291087	Island	DAXX;DAXX;DAXX;DAXX;DAXX;DAXX;DAXX	NM_001141969;NM_001141969;NR_024517;NM_001141970;NM_001350;NM_001141970;NM_001350	1stExon;5'UTR;Body;5'UTR;1stExon;1stExon;5'UTR			6:33398379-33399346	6:33290313-33291433	Promoter_Associated	-1.12134	-1.46806	-9.92933	2.29186e-17	1.46534e-14	28.957
cg18415585	chr14	21100888	-	cg18415585	rs79246363	0.025174	NA	NA	NA	NA	chr14:21100838-21101043	Island				DMR		14:20170581-20170879			-1.11974	-1.13158	-10.5965	5.67812e-19	6.08463e-16	32.5571
cg27206407	chr17	76349089	-	cg27206407	NA	NA	NA	NA	NA	NA	chr17:76348848-76349459	Island					TRUE	17:73860444-73861016	17:76347476-76349559	Unclassified	-1.1186	-0.832096	-6.89037	2.66386e-10	1.98262e-08	13.1331
cg02561205	chr11	65479380	+	cg02561205	NA	NA	NA	NA	NA	NA	chr11:65479349-65480024	Island	KAT5;KAT5;KAT5	NM_006388;NM_182709;NM_182710	TSS200;TSS200;TSS200			11:65235926-65236622	11:65479168-65480474	Promoter_Associated	-1.11509	-2.26664	-10.447	1.30179e-18	1.25999e-15	31.7494
cg24357026	chr19	36705589	+	cg24357026	NA	NA	NA	NA	NA	NA	chr19:36705433-36706262	Island	ZNF565;ZNF146;ZNF146;ZNF146;ZNF146;ZNF146;ZNF565;ZNF146	NM_152477;NM_001099638;NM_001099639;NM_001099639;NM_007145;NM_001099638;NM_001042474;NM_007145	TSS200;1stExon;1stExon;5'UTR;5'UTR;5'UTR;5'UTR;1stExon			19:41397087-41398164	19:36705030-36707001	Unclassified	-1.09576	-2.60796	-10.0029	1.52583e-17	1.03713e-14	29.3532
cg06785746	chr17	44896166	+	cg06785746	NA	NA	NA	NA	NA	NA	chr17:44895800-44897025	Island	WNT3	NM_030753	TSS200	DMR	TRUE	17:42250833-42252083			-1.09576	-2.72753	-10.8819	1.16453e-19	1.54802e-16	34.0989
cg15059389	chr1	12079390	+	cg15059389	NA	NA	NA	NA	NA	NA	chr1:12079251-12079903	Island	MIIP	NM_021933	TSS200			1:12001821-12002490	1:12079085-12080127	Promoter_Associated	-1.09521	-2.0505	-9.9983	1.56489e-17	1.06025e-14	29.3285
cg07956515	chr7	23053981	+	cg07956515	rs116701031	0.013901	NA	NA	NA	NA	chr7:23052971-23054002	Island	FAM126A	NM_032581	TSS1500	DMR		7:23019431-23020527	7:23052701-23054214	Promoter_Associated	-1.09404	-1.74827	-10.4549	1.24604e-18	1.21162e-15	31.792
cg13259296	chr2	24232884	+	cg13259296	NA	NA	NA	NA	NA	NA	chr2:24232680-24233260	Island	MFSD2B	NM_001080473	TSS200		TRUE	2:24086014-24087196	2:24232851-24233298	Unclassified_Cell_type_specific	-1.08512	-2.02016	-11.5726	2.52452e-21	5.19976e-18	37.8257
cg27243409	chr3	57261974	-	cg27243409	NA	NA	NA	NA	NA	NA	chr3:57261455-57262598	Island	APPL1	NM_012096	Body			3:57236404-57237334	3:57261424-57261987	Promoter_Associated	-1.05732	-2.40259	-12.1832	8.63018e-23	2.57108e-19	41.1066
cg17139369	chr19	8478169	-	cg17139369	NA	NA	NA	NA	NA	NA	chr19:8478005-8478226	Island	MARCH2;MARCH2;MARCH2	NM_001005415;NM_001005416;NM_016496	TSS200;TSS200;TSS200			19:8383920-8384476	19:8477727-8478477	Promoter_Associated	-1.05683	-2.78737	-9.84541	3.64508e-17	2.16266e-14	28.5052
cg18448949	chr2	176993089	-	cg18448949	NA	NA	NA	NA	NA	NA	chr2:176992950-176993186	Island	HOXD8	NM_019558	TSS1500			2:176701214-176702101			-1.04414	-1.08416	-11.58	2.42313e-21	5.08935e-18	37.8656
cg26094984	chr2	197457425	-	cg26094984	NA	NA	NA	NA	NA	NA	chr2:197457392-197458522	Island	HECW2	NM_020760	TSS200			2:197165444-197166794			-1.04263	-2.32755	-10.2577	3.7189e-18	2.98793e-15	30.7276
cg17479131	chr7	149567078	+	cg17479131	rs17756342	0.418448	NA	NA	NA	NA	chr7:149570366-149571272	N_Shelf	LOC401431	NR_027040	Body				7:149566796-149568142	Promoter_Associated_Cell_type_specific	-1.03617	-0.486997	-14.4531	3.79512e-28	5.49722e-24	53.0608
cg10810752	chr1	47691160	-	cg10810752	NA	NA	NA	NA	NA	NA	chr1:47690980-47691727	Island	TAL1	NM_003189	Body	DMR	TRUE	1:47463421-47464314	1:47690950-47691551	Unclassified_Cell_type_specific	-1.03287	-1.58747	-11.2177	1.80582e-20	2.98646e-17	35.9123
cg26647929	chr7	28966468	+	cg26647929	NA	NA	NA	NA	NA	NA		OpenSea						7:28932985-28933011	7:28966239-28967648	Unclassified	-1.02813	-1.51927	-11.8899	4.36033e-22	1.09025e-18	39.5327
cg05700333	chr5	131892723	-	cg05700333	NA	NA	NA	NA	NA	NA	chr5:131892564-131892957	Island	RAD50;RAD50;RAD50;RAD50	NM_005732;NM_133482;NM_005732;NM_133482	5'UTR;5'UTR;1stExon;1stExon			5:131920338-131920953	5:131892207-131893431	Promoter_Associated	-1.02503	-1.61993	-9.83214	3.92254e-17	2.2885e-14	28.4338
cg08194979	chr14	62229171	-	cg08194979	NA	NA	NA	NA	NA	NA	chr14:62228974-62229268	Island	SNAPC1;SNAPC1	NM_003082;NM_003082	1stExon;5'UTR			14:61298728-61299131	14:62228356-62229621	Promoter_Associated	-1.0239	-3.16832	-9.48581	2.64969e-16	1.20983e-13	26.5737
cg10500218	chr1	181058063	+	cg10500218	NA	NA	NA	NA	NA	NA	chr1:181057503-181059176	Island	IER5	NM_016545	1stExon			1:179323983-179325799	1:181057520-181058160	Promoter_Associated	-1.02296	-2.63038	-10.9334	8.75218e-20	1.21738e-16	34.3768
cg17258551	chr19	18077791	-	cg17258551	NA	NA	NA	NA	NA	NA	chr19:18077752-18078259	Island	KCNN1	NM_002248	5'UTR		TRUE	19:17938753-17939217	19:18077160-18078743	Unclassified	-1.02004	-0.900104	-10.9042	1.02916e-19	1.40361e-16	34.2191
cg22961275	chr19	40005758	-	cg22961275	NA	NA	NA	NA	NA	NA	chr19:40005648-40005869	Island	SELV;SELV	NM_182704;NM_182704	5'UTR;1stExon	DMR	TRUE	19:44697507-44698466	19:40005439-40005907	Unclassified_Cell_type_specific	-1.01622	-2.04329	-9.5602	1.75903e-16	8.51274e-14	26.9726
cg24758426	chr20	62185430	-	cg24758426	NA	NA	NA	NA	NA	NA	chr20:62185073-62185572	Island	C20orf195	NM_024059	5'UTR			20:61655518-61656335			-1.01255	-1.12358	-10.1669	6.15088e-18	4.68922e-15	30.2377
cg08951903	chr10	44070173	-	cg08951903	NA	NA	NA	NA	NA	NA	chr10:44069359-44070179	Island	ZNF239;ZNF239;ZNF239	NM_001099282;NM_001099284;NM_001099283	TSS200;TSS200;TSS200				10:44069111-44070531	NonGene_Associated	-1.0099	-0.509155	-10.8271	1.57857e-19	2.03757e-16	33.8029
cg02720697	chr19	3359204	-	cg02720697	NA	NA	NA	NA	NA	NA	chr19:3358495-3361248	Island	NFIC	NM_205843	TSS1500			19:3309496-3312440			-1.00779	-1.74624	-8.39093	1.03461e-13	2.1816e-11	20.7643
cg18509826	chr3	52017385	-	cg18509826	NA	NA	NA	NA	NA	NA	chr3:52017056-52017592	Island	ACY1	NM_000666	TSS200			3:51992097-51992698	3:52016250-52017641	Promoter_Associated	-1.00501	-2.00435	-12.6827	5.53206e-24	2.23444e-20	43.774
cg03640756	chr5	140864593	-	cg03640756	NA	NA	NA	NA	NA	NA	chr5:140864527-140864748	Island	PCDHGA4;PCDHGC3;PCDHGA12;PCDHGA11;PCDHGA11;PCDHGA9;PCDHGA1;PCDHGB1;PCDHGC4;PCDHGB6;PCDHGB3;PCDHGC4;PCDHGB7;PCDHGA6;PCDHGA8;PCDHGA10;PCDHGA5;PCDHGB4;PCDHGA3;PCDHGA2;PCDHGA7;PCDHGB2;PCDHGB5;PCDHGC3	NM_018917;NM_002588;NM_003735;NM_032092;NM_018914;NM_018921;NM_018912;NM_018922;NM_018928;NM_018926;NM_018924;NM_032406;NM_018927;NM_018919;NM_032088;NM_018913;NM_018918;NM_003736;NM_018916;NM_018915;NM_018920;NM_018923;NM_018925;NM_032403	Body;Body;Body;Body;Body;Body;Body;Body;TSS200;Body;Body;TSS200;Body;Body;Body;Body;Body;Body;Body;Body;Body;Body;Body;Body	CDMR	TRUE	5:140844562-140845695	5:140864468-140864686	Unclassified_Cell_type_specific	-1.00437	-0.760767	-9.52718	2.10995e-16	9.91404e-14	26.7955
cg19770116	chr3	57199524	+	cg19770116	NA	NA	NA	NA	NA	NA	chr3:57198243-57199378	S_Shore	IL17RD	NM_017563	TSS200				3:57199383-57199627	Unclassified	-1.0039	-1.61517	-9.92807	2.30792e-17	1.47337e-14	28.9502
cg09961571	chr19	39421871	-	cg09961571	NA	NA	NA	NA	NA	NA	chr19:39421063-39421615	S_Shore	MRPS12;MRPS12;SARS2;MRPS12;MRPS12;SARS2	NM_021107;NM_033363;NM_001145901;NM_033362;NM_021107;NM_017827	5'UTR;5'UTR;TSS1500;5'UTR;1stExon;TSS1500			19:44112822-44113934	19:39420414-39422145	Promoter_Associated	-0.99648	-2.25761	-10.273	3.41726e-18	2.81464e-15	30.8099
cg05367846	chr22	18507520	+	cg05367846	NA	NA	NA	NA	NA	NA	chr22:18506419-18507412	S_Shore	MICAL3;MICAL3;MICAL3	NM_015241;NM_001136004;NM_001122731	TSS200;TSS200;TSS200			22:16887047-16887668	22:18506264-18508363	Unclassified	-0.996144	-0.400997	-14.8352	4.98262e-29	1.23119e-24	55.0224
cg14228332	chr4	119757509	+	cg14228332	NA	NA	NA	NA	NA	NA	chr4:119757033-119757811	Island	SEC24D	NM_014822	TSS200			4:119976957-119977018			-0.993619	-2.65042	-9.65791	1.02648e-16	5.3431e-14	27.4971
cg03476087	chr10	26506353	+	cg03476087	NA	NA	NA	NA	NA	NA	chr10:26504383-26507434	Island	GAD2;GAD2	NM_001134366;NM_000818	Body;Body	DMR		10:26546288-26547259	10:26506326-26506419	Unclassified_Cell_type_specific	-0.987642	-1.44711	-11.1821	2.20046e-20	3.59663e-17	35.72
cg20909686	chr11	65554042	-	cg20909686	NA	NA	NA	NA	NA	NA	chr11:65553749-65555573	Island	OVOL1	NM_004561	TSS1500			11:65310172-65312328			-0.987333	-1.05807	-9.70939	7.72655e-17	4.13985e-14	27.7737
cg15825264	chr17	655740	+	cg15825264	NA	NA	NA	NA	NA	NA	chr17:655026-656707	Island	ELP2P;GEMIN4	NR_024120;NM_015721	TSS200;TSS1500			17:601553-603457	17:654305-656780	Promoter_Associated	-0.986417	-2.85448	-10.9023	1.03984e-19	1.41359e-16	34.2091
cg26221568	chr5	50259444	+	cg26221568	NA	NA	NA	NA	NA	NA		OpenSea						5:50295155-50295216	5:50258474-50259507	Unclassified	-0.980967	-2.55674	-9.76595	5.6541e-17	3.16256e-14	28.0778
cg07920855	chr1	185286635	-	cg07920855	rs75780581	0.037326	NA	NA	NA	NA	chr1:185285329-185286735	Island	IVNS1ABP	NM_006469	TSS200			1:183551934-183553620	1:185286204-185286831	Promoter_Associated	-0.980816	-1.47116	-9.14963	1.67822e-15	6.00989e-13	24.7763
cg02339078	chr5	90679543	-	cg02339078	rs35712350	0.328175	NA	NA	NA	NA	chr5:90675822-90676930	S_Shelf	LOC100129716;ARRDC3	NR_027435;NM_020801	Body;TSS1500			5:90714853-90715393	5:90678335-90680109	Promoter_Associated	-0.980663	-2.77922	-9.26826	8.7587e-16	3.40403e-13	25.4095
cg03864326	chr16	67927170	-	cg03864326	rs7196789	0.250759	NA	NA	NA	NA	chr16:67926918-67927696	Island	PSKH1	NM_006742	TSS200			16:66484444-66485184	16:67926423-67928106	Promoter_Associated	-0.979328	-2.74209	-11.69	1.31771e-21	2.91327e-18	38.4578
cg03939054	chr11	96076473	-	cg03939054	rs112487260	0.019671	NA	NA	NA	NA		OpenSea	MAML2	NM_032427	TSS200			11:95715936-95716252	11:96075971-96077000	Promoter_Associated	-0.976753	-3.27556	-9.10038	2.19745e-15	7.64129e-13	24.5138
cg02478448	chr13	37006063	-	cg02478448	NA	NA	NA	NA	NA	NA	chr13:37005581-37006453	Island	CCNA1;CCNA1;CCNA1;CCNA1;CCNA1;CCNA1	NM_001111047;NM_001111047;NM_001111046;NM_003914;NM_001111045;NM_001111046	1stExon;5'UTR;1stExon;TSS1500;TSS1500;5'UTR		TRUE	13:35903489-35904933			-0.974886	-1.02631	-10.2267	4.4178e-18	3.43659e-15	30.5599
cg02386183	chr20	13619553	+	cg02386183	NA	NA	NA	NA	NA	NA	chr20:13619285-13619770	Island	TASP1;TASP1	NM_017714;NM_017714	1stExon;5'UTR			20:13567177-13567795	20:13619084-13620161	Promoter_Associated	-0.974798	-1.64361	-12.8418	2.31298e-24	1.04473e-20	44.6202
cg07944736	chr1	28908226	+	cg07944736	NA	NA	NA	NA	NA	NA	chr1:28908069-28908799	Island	SNHG12;SNORA44;SNORA16A	NR_024127;NR_002976;NR_003035	Body;TSS1500;TSS1500			1:28780174-28781358	1:28907339-28909073	Promoter_Associated	-0.972671	-0.938082	-11.987	2.54964e-22	6.73593e-19	40.0542
cg10407266	chr6	31588727	-	cg10407266	rs193025229	0.2051	NA	NA	NA	NA	chr6:31587779-31589024	Island	BAT2	NM_080686	5'UTR			6:31696373-31697198	6:31587577-31589180	Promoter_Associated	-0.971368	-0.784176	-8.28463	1.83156e-13	3.57847e-11	20.2085
cg19398112	chr19	14529923	+	cg19398112	NA	NA	NA	NA	NA	NA	chr19:14529731-14530505	Island	DDX39	NM_005804	5'UTR			19:14390732-14391505	19:14529539-14530698	Unclassified	-0.969688	-0.863836	-9.85058	3.54238e-17	2.10769e-14	28.5331
cg23797839	chr10	60094994	-	cg23797839	NA	NA	NA	NA	NA	NA	chr10:60094731-60095306	Island	UBE2D1	NM_003338	Body			10:59764688-59765495	10:60094099-60095621	Promoter_Associated	-0.96441	-0.18407	-11.9316	3.46301e-22	8.92445e-19	39.7566
cg12057946	chr11	120195905	+	cg12057946	NA	NA	NA	NA	NA	NA	chr11:120195805-120196372	Island	TMEM136	NM_174926	TSS200			11:119701032-119701582	11:120195674-120196172	Unclassified	-0.96341	-0.0644795	-12.3016	4.49577e-23	1.46396e-19	41.74
cg23298160	chr5	137514800	-	cg23298160	NA	NA	NA	NA	NA	NA	chr5:137514660-137514941	Island	BRD8;BRD8;KIF20A;BRD8;KIF20A	NM_139199;NM_001164326;NM_005733;NM_006696;NM_005733	TSS1500;TSS1500;1stExon;TSS1500;5'UTR			5:137542510-137543057	5:137513627-137515151	Promoter_Associated	-0.962404	-2.38021	-9.76802	5.58986e-17	3.1308e-14	28.0889
cg06492699	chr3	39149242	+	cg06492699	rs28362644	0.080348	NA	NA	NA	NA	chr3:39148377-39149400	Island	GORASP1;TTC21A;TTC21A;TTC21A;TTC21A	NM_031899;NM_145755;NM_001105513;NM_001105513;NM_145755	TSS200;1stExon;5'UTR;1stExon;5'UTR			3:39123283-39124404			-0.961573	-2.94086	-10.9867	6.50767e-20	9.62548e-17	34.6651
cg07920148	chr11	33397821	+	cg07920148	NA	NA	NA	NA	NA	NA	chr11:33397607-33398494	Island						11:33353817-33355260			-0.956793	-1.23787	-12.9536	1.25509e-24	6.27643e-21	45.2132
cg00116058	chr5	154320652	-	cg00116058	NA	NA	NA	NA	NA	NA	chr5:154317459-154317930	S_Shelf	MRPL22;MRPL22;MRPL22;MRPL22	NM_001014990;NM_014180;NM_001014990;NM_014180	5'UTR;1stExon;1stExon;5'UTR			5:154300696-154301148	5:154320233-154321092	Promoter_Associated	-0.956219	-1.81576	-9.4881	2.6165e-16	1.19727e-13	26.5859
cg21054968	chr7	155089542	-	cg21054968	NA	NA	NA	NA	NA	NA	chr7:155088705-155090212	Island	INSIG1;INSIG1;INSIG1;INSIG1;INSIG1;INSIG1	NM_198336;NM_198337;NM_005542;NM_198337;NM_005542;NM_198336	5'UTR;1stExon;1stExon;5'UTR;5'UTR;1stExon			7:154719387-154721328	7:155088257-155089770	Promoter_Associated	-0.955125	-2.90762	-8.37886	1.10404e-13	2.30158e-11	20.7011
cg03510158	chr14	74318586	-	cg03510158	rs8020091	0.069124	NA	NA	NA	NA	chr14:74318412-74318785	Island	PTGR2;PTGR2;PTGR2;PTGR2;PTGR2	NM_001146154;NM_001146155;NM_152444;NM_001146155;NM_001146154	5'UTR;1stExon;TSS200;5'UTR;1stExon			14:73388166-73388562	14:74318161-74319076	Promoter_Associated	-0.952345	-1.7993	-9.27134	8.61218e-16	3.36103e-13	25.4259
cg00134776	chr3	139653573	+	cg00134776	NA	NA	NA	NA	NA	NA	chr3:139653430-139655115	Island	CLSTN2	NM_022131	TSS1500	CDMR		3:141136121-141137805	3:139653383-139653703	Unclassified_Cell_type_specific	-0.950042	-1.71759	-12.5091	1.43485e-23	5.42999e-20	42.8489
cg10463451	chr21	37432625	+	cg10463451	rs34202426	0.031963	NA	NA	NA	NA	chr21:37432123-37433150	Island	SETD4;SETD4	NM_017438;NM_001007259	5'UTR;TSS200			21:36354001-36355006	21:37432052-37433551	Promoter_Associated	-0.949907	-1.02855	-11.6371	1.7657e-21	3.80362e-18	38.1733
cg20180092	chr3	39425780	-	cg20180092	rs115072192	0.011295	NA	NA	NA	NA	chr3:39424696-39426058	Island	SLC25A38	NM_017875	Body			3:39399701-39401062	3:39424502-39426224	Promoter_Associated	-0.947776	-3.26995	-9.59532	1.44958e-16	7.2061e-14	27.161
cg20772101	chr5	38258623	+	cg20772101	NA	NA	NA	NA	NA	NA	chr5:38257825-38259136	Island	EGFLAM;EGFLAM	NM_152403;NM_152403	1stExon;5'UTR	DMR	TRUE	5:38293406-38294893			-0.937668	-0.728048	-9.86151	3.33475e-17	1.9983e-14	28.5919
cg00859739	chr20	60697463	-	cg00859739	NA	NA	NA	NA	NA	NA	chr20:60696561-60698342	Island	LSM14B	NM_144703	TSS200			20:60129957-60132175	20:60697064-60697633	Promoter_Associated	-0.936375	-0.691004	-8.52763	4.95092e-14	1.14774e-11	21.4815
cg15433604	chr19	18942513	+	cg15433604	rs2238652	0.054195	NA	NA	NA	NA	chr19:18942432-18943127	Island	UPF1	NM_002911	TSS1500			19:18803465-18805012	19:18942494-18942843	Promoter_Associated	-0.936106	-2.72014	-10.2623	3.62502e-18	2.92835e-15	30.7525
cg07835289	chr1	236030215	+	cg07835289	NA	NA	NA	NA	NA	NA	chr1:236029587-236030597	Island	LYST;LYST	NM_000081;NM_000081	5'UTR;1stExon			1:234096039-234097220	1:236030024-236030531	Promoter_Associated	-0.935429	-0.384825	-12.1899	8.31912e-23	2.49612e-19	41.1422
cg15176678	chr19	10230499	+	cg15176678	NA	NA	NA	NA	NA	NA	chr19:10230162-10230682	Island	EIF3G	NM_003755	Body			19:10091212-10091682	19:10230074-10230895	Promoter_Associated_Cell_type_specific	-0.934873	-2.35929	-11.8235	6.29384e-22	1.51075e-18	39.176
cg18661731	chr18	59854239	+	cg18661731	rs149176694	0.016	NA	NA	NA	NA	chr18:59853977-59855252	Island	PIGN;PIGN;PIGN;PIGN;KIAA1468	NM_176787;NM_012327;NM_176787;NM_012327;NM_020854	5'UTR;5'UTR;1stExon;1stExon;TSS1500			18:58004752-58006272	18:59853696-59855671	Promoter_Associated	-0.93211	-2.22289	-8.98231	4.18923e-15	1.32811e-12	23.8856
cg13055374	chr1	54872983	+	cg13055374	NA	NA	NA	NA	NA	NA	chr1:54872673-54873000	Island	SSBP3;SSBP3;SSBP3	NM_001009955;NM_145716;NM_018070	TSS1500;TSS1500;TSS1500			1:54643172-54645828			-0.929523	-2.34369	-8.75621	1.43511e-14	3.90946e-12	22.6869
cg16583330	chr1	36916012	-	cg16583330	NA	NA	NA	NA	NA	NA	chr1:36915796-36916324	Island	OSCP1;OSCP1;OSCP1;OSCP1	NM_145047;NM_206837;NM_145047;NM_206837	1stExon;5'UTR;5'UTR;1stExon			1:36688451-36689089	1:36915468-36916835	Promoter_Associated	-0.928122	-2.11044	-9.30235	7.2642e-16	2.9006e-13	25.5916
cg14359486	chr9	21396119	-	cg14359486	NA	NA	NA	NA	NA	NA	chr9:21396071-21396364	Island				DMR		9:21386015-21386314	9:21395634-21396884	Unclassified	-0.927229	-1.1102	-9.52762	2.10492e-16	9.90145e-14	26.7978
cg21824413	chr3	23987438	-	cg21824413	NA	NA	NA	NA	NA	NA	chr3:23986693-23988021	Island	NR1D2;NR1D2	NM_001145425;NM_005126	TSS200;Body			3:23961305-23963117	3:23987250-23987950	Promoter_Associated	-0.925069	-3.08525	-8.10315	4.83588e-13	8.35614e-11	19.264
cg07391610	chr1	211432754	-	cg07391610	NA	NA	NA	NA	NA	NA	chr1:211432105-211434134	Island	RCOR3;RCOR3;RCOR3;RCOR3;RCOR3;RCOR3;RCOR3	NM_018254;NM_001136225;NM_001136224;NM_001136223;NM_001136225;NM_001136224;NM_001136223	TSS1500;1stExon;5'UTR;5'UTR;5'UTR;1stExon;1stExon			1:209498606-209499940	1:211431659-211432903	Promoter_Associated	-0.918321	-3.46045	-10.3495	2.23599e-18	1.9691e-15	31.2229
cg12839172	chr4	16085077	+	cg12839172	NA	NA	NA	NA	NA	NA	chr4:16084195-16085735	Island	PROM1;PROM1	NM_001145848;NM_001145847	5'UTR;5'UTR		TRUE	4:15693057-15694833			-0.918128	-1.04187	-12.1491	1.04194e-22	3.01153e-19	40.9236
cg25313289	chr16	2264884	+	cg25313289	NA	NA	NA	NA	NA	NA	chr16:2263912-2265428	Island	PGP	NM_001042371	TSS200			16:2203914-2205448	16:2263767-2265647	Promoter_Associated	-0.917094	-2.36727	-10.5333	8.06273e-19	8.20064e-16	32.2158
cg27280396	chr15	61521715	-	cg27280396	NA	NA	NA	NA	NA	NA	chr15:61520423-61521716	Island	RORA	NM_134261	TSS1500			15:59308880-59309405	15:61521247-61521996	Unclassified_Cell_type_specific	-0.916746	-1.7525	-9.76024	5.83511e-17	3.23794e-14	28.0471
cg18147735	chr4	39460314	+	cg18147735	rs11550000	0.225201	NA	NA	NA	NA	chr4:39460087-39460811	Island	LIAS;RPL9;LIAS;RPL9	NM_194451;NM_000661;NM_006859;NM_001024921	TSS1500;5'UTR;TSS1500;TSS200			4:39136483-39137237	4:39459820-39461469	Promoter_Associated	-0.916707	-0.0740376	-10.6908	3.36447e-19	3.86145e-16	33.0664
cg06348038	chr1	207038460	-	cg06348038	NA	NA	NA	NA	NA	NA		OpenSea	IL20	NM_018724	TSS1500				1:207037783-207039099	Unclassified	-0.914652	-2.22116	-13.126	4.89623e-25	2.84151e-21	46.1261
cg02266452	chr11	82905235	-	cg02266452	NA	NA	NA	NA	NA	NA	chr11:82904478-82905660	Island	ANKRD42	NM_182603	TSS200			11:82582102-82583308	11:82904006-82905884	Unclassified	-0.914504	-1.00932	-12.198	7.95671e-23	2.40455e-19	41.1855
cg01182973	chr22	38240624	-	cg01182973	NA	NA	NA	NA	NA	NA	chr22:38239792-38240409	S_Shore	ANKRD54;MIR658	NM_138797;NR_030395	TSS1500;TSS1500				22:38239497-38240823	Promoter_Associated	-0.913842	-2.10212	-11.2364	1.62776e-20	2.71335e-17	36.0132
cg25042789	chr6	32819964	+	cg25042789	rs41549617	0.000124	NA	NA	NA	NA	chr6:32820849-32822370	N_Shore	TAP1	NM_000593	Body						-0.913782	0.22054	-8.0301	7.13652e-13	1.17422e-10	18.8855
cg04769705	chr14	69262517	-	cg04769705	NA	NA	NA	NA	NA	NA	chr14:69259612-69262900	Island	C14orf181	NM_207442	1stExon			14:68332270-68332730	14:69262374-69263508	Promoter_Associated	-0.910717	-1.31382	-9.06415	2.67899e-15	9.03167e-13	24.3209
cg00533811	chr22	51021411	+	cg00533811	NA	NA	NA	NA	NA	NA	chr22:51020656-51021817	Island	CHKB-CPT1B;CHKB;LOC100144603;CHKB	NR_027928;NM_005198;NR_021492;NM_005198	Body;5'UTR;TSS200;1stExon			22:49367438-49369010	22:51020269-51022182	Promoter_Associated	-0.90562	-1.85776	-10.1628	6.29265e-18	4.77996e-15	30.2155
cg14841842	chr10	15130785	+	cg14841842	rs79247418	0.039062	NA	NA	NA	NA	chr10:15130386-15130913	Island	ACBD7	NM_001039844	TSS200			10:15170405-15170979	10:15130266-15131185	Promoter_Associated	-0.903713	-2.32068	-10.396	1.72717e-18	1.59106e-15	31.4742
cg14935078	chr19	17414399	-	cg14935078	NA	NA	NA	NA	NA	NA	chr19:17413733-17414486	Island	ABHD8	NM_024527	TSS200				19:17413689-17414622	Unclassified	-0.901676	-0.83459	-10.5159	8.88396e-19	8.94924e-16	32.1214
cg19403541	chr4	174438312	+	cg19403541	NA	NA	NA	NA	NA	NA	chr4:174437914-174438346	Island				RDMR	TRUE	4:174674335-174674997			-0.9007	-1.28332	-10.4208	1.50503e-18	1.42069e-15	31.6082
cg01506766	chr13	46626746	+	cg01506766	NA	NA	NA	NA	NA	NA	chr13:46626454-46627019	Island	ZC3H13	NM_015070	5'UTR			13:45524297-45524766	13:46626121-46627251	Promoter_Associated	-0.900124	-2.00941	-9.51449	2.26275e-16	1.05561e-13	26.7274
cg08054244	chr14	88789549	+	cg08054244	NA	NA	NA	NA	NA	NA	chr14:88789600-88790493	N_Shore	KCNK10;KCNK10;KCNK10	NM_138317;NM_021161;NM_138317	1stExon;Body;5'UTR	DMR	TRUE	14:87858997-87860322			-0.895488	-3.14698	-7.50413	1.13996e-11	1.31222e-09	16.1919
cg17202948	chr17	72772736	-	cg17202948	rs188000786	0.0156	NA	NA	NA	NA	chr17:72772244-72772692	S_Shore	NAT9;TMEM104	NM_015654;NM_017728	TSS1500;5'UTR			17:70283877-70284361	17:72771670-72773434	Promoter_Associated	-0.894191	-1.16207	-9.87942	3.0204e-17	1.83613e-14	28.6883
cg27659071	chr6	52859607	+	cg27659071	rs7742162	0.013503	NA	NA	NA	NA	chr6:52859565-52859767	Island	GSTA4	NM_001512	5'UTR			6:52967525-52967783	6:52859528-52860542	Promoter_Associated	-0.894085	-1.76452	-10.3564	2.152e-18	1.91927e-15	31.2601
cg06549928	chr1	89990868	-	cg06549928	NA	NA	NA	NA	NA	NA	chr1:89989810-89990986	Island	LRRC8B	NM_001134476	5'UTR			1:89762399-89763630			-0.89313	-1.12457	-6.88282	2.76725e-10	2.04786e-08	13.0962
cg03562264	chr6	36646551	-	cg03562264	NA	NA	NA	NA	NA	NA	chr6:36646244-36648465	Island	CDKN1A;CDKN1A;CDKN1A;CDKN1A	NM_000389;NM_000389;NM_078467;NM_078467	5'UTR;1stExon;1stExon;5'UTR			6:36754276-36756443	6:36646229-36646600	Unclassified	-0.886786	-1.93976	-9.12218	1.95038e-15	6.85022e-13	24.63
cg17945282	chr3	142297905	-	cg17945282	NA	NA	NA	NA	NA	NA	chr3:142297219-142297849	S_Shore	ATR	NM_001184	TSS1500			3:143779910-143780634	3:142296656-142298245	Promoter_Associated	-0.885811	-2.24049	-11.0371	4.92047e-20	7.43493e-17	34.9371
cg16022555	chr17	43394535	+	cg16022555	rs115344032	0.030408	NA	NA	NA	NA	chr17:43393891-43394938	Island	MAP3K14	NM_003954	TSS200			17:40749560-40750721	17:43393419-43395322	Promoter_Associated	-0.885422	-0.715062	-8.83378	9.41259e-15	2.73436e-12	23.0975
cg08427575	chr7	75988356	+	cg08427575	rs140099111	0.0137	NA	NA	NA	NA	chr7:75987606-75988977	Island	YWHAG	NM_012479	TSS200			7:75825374-75826863	7:75987210-75989367	Promoter_Associated	-0.884972	-2.99634	-8.12194	4.37447e-13	7.65649e-11	19.3615
cg17515702	chr17	76210520	+	cg17515702	NA	NA	NA	NA	NA	NA	chr17:76210129-76210627	Island	BIRC5;BIRC5;EPR1;BIRC5	NM_001012270;NM_001012271;NR_002219;NM_001168	Body;Body;Body;Body			17:73721744-73722208	17:76210036-76210675	Promoter_Associated	-0.883325	-1.0763	-10.9403	8.41922e-20	1.1876e-16	34.4145
cg03252499	chr11	124324477	+	cg03252499	rs114092723	0.02563	NA	NA	NA	NA		OpenSea					TRUE				-0.88193	-0.466599	-13.2618	2.3355e-25	1.48646e-21	46.8438
cg11528984	chr1	228353883	-	cg11528984	NA	NA	NA	NA	NA	NA	chr1:228353108-228353986	Island	C1orf69	NM_001010867	Body			1:226419601-226420513	1:228352814-228354670	Promoter_Associated	-0.881896	-2.61025	-9.17004	1.50075e-15	5.45812e-13	24.8851
cg17030173	chr5	16180062	-	cg17030173	NA	NA	NA	NA	NA	NA	chr5:16179064-16180420	Island	MARCHF11	NM_001102562	TSS200			5:16232065-16233771			-0.879889	-0.337401	-9.07566	2.5156e-15	8.57721e-13	24.3822
cg06942668	chr2	163200476	-	cg06942668	NA	NA	NA	NA	NA	NA	chr2:163200575-163201025	N_Shore	GCA	NM_012198	TSS200			2:162908669-162909368	2:163200169-163201451	Promoter_Associated	-0.879179	-2.06829	-10.3528	2.1955e-18	1.94158e-15	31.2406
cg20530585	chr3	149376036	+	cg20530585	NA	NA	NA	NA	NA	NA	chr3:149374709-149376300	Island	WWTR1;WWTR1;WWTR1	NM_001168278;NM_015472;NM_001168280	5'UTR;TSS200;TSS1500	DMR		3:150857299-150859184			-0.878697	-1.91282	-13.8636	8.96314e-27	8.18499e-23	50.002
cg17520314	chr17	79604207	+	cg17520314	NA	NA	NA	NA	NA	NA	chr17:79603627-79603886	S_Shore	NPLOC4	NM_017921	TSS200			17:77214101-77214711	17:79603472-79604468	Promoter_Associated	-0.872367	-1.39971	-9.85898	3.38178e-17	2.02072e-14	28.5782
cg08187083	chr17	30186506	-	cg08187083	NA	NA	NA	NA	NA	NA	chr17:30185764-30186580	Island	C17orf79	NM_018405	TSS200			17:27209789-27210693	17:30185334-30187064	Promoter_Associated	-0.870779	-2.00302	-10.5758	6.37017e-19	6.67302e-16	32.4451
cg25652024	chr7	127506210	+	cg25652024	NA	NA	NA	NA	NA	NA		OpenSea	SND1	NM_014390	Body		TRUE				-0.870466	2.94606	-3.43848	0.00080235	0.0040229	-1.13009
cg21925296	chr8	22102597	+	cg21925296	NA	NA	NA	NA	NA	NA	chr8:22102303-22103142	Island	POLR3D;MIR320A	NM_001722;NR_029714	TSS200;TSS200			8:22157977-22159038	8:22102510-22103015	Promoter_Associated	-0.868096	-3.14688	-8.5713	3.9099e-14	9.34781e-12	21.7113
cg04937402	chr14	23770452	-	cg04937402	NA	NA	NA	NA	NA	NA	chr14:23770512-23771902	N_Shore	PPP1R3E	NR_026862	Body			14:22840266-22842007	14:23768914-23771359	Promoter_Associated	-0.864848	-3.2174	-11.1428	2.73755e-20	4.40592e-17	35.5076
cg26629969	chr19	51069496	+	cg26629969	NA	NA	NA	NA	NA	NA	chr19:51069359-51069600	Island	LRRC4B	NM_001080457	5'UTR			19:55760658-55761367			-0.864129	-1.50082	-9.86304	3.30662e-17	1.98712e-14	28.6001
cg00879163	chr7	66386079	+	cg00879163	NA	NA	NA	NA	NA	NA	chr7:66386044-66386809	Island	C7orf42	NM_017994	TSS200			7:66023297-66024244			-0.86019	-1.71842	-7.79412	2.49156e-12	3.45989e-10	17.6697
cg07387607	chr6	31587714	-	cg07387607	NA	NA	NA	NA	NA	NA	chr6:31587779-31589024	N_Shore	BAT2	NM_080686	TSS1500				6:31587577-31589180	Promoter_Associated	-0.860157	-1.51789	-8.18352	3.14803e-13	5.76199e-11	19.6816
cg21803486	chr17	40761316	+	cg21803486	NA	NA	NA	NA	NA	NA	chr17:40761059-40761761	Island	FAM134C;FAM134C;TUBG1	NM_178126;NR_026697;NM_001070	1stExon;Body;TSS200			17:38014327-38015865	17:40760645-40761942	Promoter_Associated	-0.858943	-1.62225	-11.8813	4.57333e-22	1.13674e-18	39.4864
cg19983627	chr4	108852959	-	cg19983627	NA	NA	NA	NA	NA	NA	chr4:108852495-108853387	Island	CYP2U1	NM_183075	1stExon			4:109071902-109072941	4:108851893-108853616	Promoter_Associated	-0.858084	-1.84909	-8.66091	2.40692e-14	6.07609e-12	22.1835
cg04296578	chr1	45671659	+	cg04296578	NA	NA	NA	NA	NA	NA	chr1:45671702-45672388	N_Shore	ZSWIM5	NM_020883	1stExon			1:45443890-45445266			-0.858023	-2.97476	-9.8927	2.80661e-17	1.72369e-14	28.7598
cg07460449	chr16	67840720	+	cg07460449	NA	NA	NA	NA	NA	NA	chr16:67840275-67841106	Island	TSNAXIP1;RANBP10	NM_018430;NM_020850	TSS1500;TSS200			16:66397662-66398607	16:67839732-67841257	Promoter_Associated	-0.857804	-2.12221	-9.75803	5.90702e-17	3.2649e-14	28.0352
cg20755651	chr6	168841574	-	cg20755651	NA	NA	NA	NA	NA	NA	chr6:168841438-168841699	Island	SMOC2;SMOC2	NM_001166412;NM_022138	TSS1500;TSS1500			6:168584248-168585976			-0.85767	-0.252228	-9.60178	1.39881e-16	7.00343e-14	27.1957
cg13031210	chr12	45444902	-	cg13031210	NA	NA	NA	NA	NA	NA	chr12:45444202-45445386	Island	DBX2	NM_001004329	TSS200	DMR	TRUE	12:43730401-43731291			-0.857282	-0.738472	-9.91478	2.48395e-17	1.562e-14	28.8787
cg08045063	chr3	43147672	-	cg08045063	rs729654	0.464725	NA	NA	NA	NA	chr3:43147184-43147713	Island	C3orf39	NM_032806	TSS200			3:43121866-43122690	3:43146658-43148258	Promoter_Associated	-0.854337	-0.866203	-8.65254	2.51864e-14	6.33527e-12	22.1394
cg13783244	chr4	140005441	+	cg13783244	NA	NA	NA	NA	NA	NA	chr4:140004718-140005806	Island	ELF2;ELF2;ELF2	NM_006874;NM_006874;NM_201999	5'UTR;1stExon;Body			4:140223472-140225211	4:140005234-140005578	Promoter_Associated	-0.85299	-2.94945	-10.0693	1.05657e-17	7.48442e-15	29.711
cg12461364	chr10	12084985	+	cg12461364	NA	NA	NA	NA	NA	NA	chr10:12084236-12085431	Island	UPF2;UPF2;UPF2	NM_080599;NM_080599;NM_015542	5'UTR;1stExon;TSS200			10:12124243-12125437	10:12084071-12085781	Promoter_Associated	-0.849512	-1.19218	-9.1552	1.62777e-15	5.84417e-13	24.806
cg27478603	chr17	77715655	+	cg27478603	NA	NA	NA	NA	NA	NA	chr17:77715570-77716061	Island	ENPP7	NM_178543	3'UTR		TRUE	17:75330193-75330677	17:77715297-77716881	Unclassified	-0.849288	-0.451566	-9.62775	1.21221e-16	6.1947e-14	27.3351
cg05845236	chr13	67804635	+	cg05845236	NA	NA	NA	NA	NA	NA	chr13:67804593-67805459	Island	PCDH9;PCDH9	NM_203487;NM_020403	TSS200;TSS200	DMR		13:66702130-66703447	13:67803967-67805360	Promoter_Associated_Cell_type_specific	-0.84703	-2.72338	-9.17833	1.43408e-15	5.26119e-13	24.9294
cg02585790	chr2	232329254	+	cg02585790	NA	NA	NA	NA	NA	NA	chr2:232328445-232330149	Island	NCL	NM_005381	TSS200			2:232036690-232038360	2:232328860-232329819	Promoter_Associated	-0.847005	-2.07332	-9.71772	7.37935e-17	3.97604e-14	27.8185
cg04902826	chr10	105677453	-	cg04902826	NA	NA	NA	NA	NA	NA	chr10:105677555-105678040	N_Shore	OBFC1	NM_024928	5'UTR				10:105677214-105678677	Promoter_Associated	-0.845243	-1.08376	-12.3488	3.46526e-23	1.18344e-19	41.9928
cg25858983	chr17	42295711	+	cg25858983	NA	NA	NA	NA	NA	NA	chr17:42295861-42299719	N_Shore	UBTF;UBTF;UBTF	NM_001076684;NM_014233;NM_001076683	5'UTR;TSS200;5'UTR				17:42294752-42297183	Promoter_Associated	-0.842598	-0.873154	-12.4786	1.69719e-23	6.36544e-20	42.6859
cg21566348	chr3	182510892	-	cg21566348	rs6791488	0.135683	NA	NA	NA	NA	chr3:182510866-182512282	Island	ATP11B	NM_014616	TSS1500			3:183993369-183994976			-0.842109	-0.936593	-10.2643	3.58505e-18	2.90724e-15	30.7633
cg00850501	chr19	14530371	-	cg00850501	NA	NA	NA	NA	NA	NA	chr19:14529731-14530505	Island	DDX39	NM_005804	TSS1500			19:14390732-14391505	19:14529539-14530698	Unclassified	-0.840998	-1.50859	-9.67828	9.17335e-17	4.81674e-14	27.6065
cg04174309	chr11	117102980	+	cg04174309	NA	NA	NA	NA	NA	NA	chr11:117102742-117103452	Island	RNF214;PCSK7;RNF214	NM_207343;NM_004716;NM_001077239	TSS1500;TSS200;TSS1500			11:116607953-116609151	11:117102661-117103513	Promoter_Associated	-0.838408	-0.947809	-9.51288	2.28282e-16	1.06194e-13	26.7188
cg20982606	chr12	109535391	+	cg20982606	NA	NA	NA	NA	NA	NA	chr12:109535264-109536431	Island	UNG;UNG	NM_003362;NM_080911	TSS1500;TSS200			12:108019683-108020814	12:109535251-109536877	Promoter_Associated	-0.83765	-0.26773	-11.3114	1.07417e-20	1.91194e-17	36.4175
cg25325159	chr1	19812210	-	cg25325159	NA	NA	NA	NA	NA	NA	chr1:19811703-19812644	Island	CAPZB	NM_004930	TSS200			1:19683465-19685231	1:19811869-19812775	Promoter_Associated	-0.836454	-1.28701	-9.42455	3.71174e-16	1.60739e-13	26.2455
cg09130556	chr2	38304030	-	cg09130556	NA	NA	NA	NA	NA	NA	chr2:38301276-38304518	Island	CYP1B1	NM_000104	TSS1500		TRUE	2:38157298-38158106			-0.83473	-1.94791	-7.7066	3.95028e-12	5.18716e-10	17.2217
cg10197432	chr6	146920119	+	cg10197432	NA	NA	NA	NA	NA	NA	chr6:146920034-146920245	Island	C6orf103	NM_024694	TSS200		TRUE	6:146961707-146961938			-0.8331	-1.43566	-7.6045	6.74862e-12	8.31578e-10	16.7012
cg14407075	chr12	50794574	-	cg14407075	NA	NA	NA	NA	NA	NA	chr12:50794549-50794920	Island	LARP4;LARP4;LARP4;LARP4;LARP4;LARP4;LARP4	NM_052879;NM_001170804;NM_001170803;NR_033200;NM_199190;NM_199188;NM_001170808	TSS200;TSS200;TSS200;TSS200;TSS200;TSS200;TSS200			12:49080738-49081489	12:50793932-50795911	Promoter_Associated	-0.830081	-1.25842	-9.32785	6.31516e-16	2.56554e-13	25.728
cg03965885	chr4	78079304	+	cg03965885	NA	NA	NA	NA	NA	NA	chr4:78077995-78079591	Island	CCNG2	NM_004354	5'UTR			4:78296773-78298509	4:78079057-78079671	Promoter_Associated	-0.829931	-2.88479	-10.0924	9.29669e-18	6.69846e-15	29.8356
cg02782622	chr2	69534307	-	cg02782622	NA	NA	NA	NA	NA	NA	chr2:69533609-69534775	Island					TRUE	2:69387003-69387870	2:69532894-69534886	Promoter_Associated	-0.827254	-1.86096	-9.159	1.59431e-15	5.74368e-13	24.8262
cg11955762	chr13	111268705	+	cg11955762	NA	NA	NA	NA	NA	NA	chr13:111267780-111268778	Island	CARKD	NM_018210	Body			13:110065632-110066753	13:111267453-111269445	Promoter_Associated	-0.825909	-0.919481	-9.37396	4.90213e-16	2.04896e-13	25.9746
cg09059670	chr5	79552137	+	cg09059670	rs1126176	0.271791	NA	NA	NA	NA	chr5:79551369-79552294	Island	SERINC5	NM_178276	TSS1500			5:79586862-79588050	5:79552015-79552141	Promoter_Associated	-0.825326	-3.0072	-10.3295	2.49788e-18	2.16791e-15	31.115
cg14527148	chr15	80216341	+	cg14527148	NA	NA	NA	NA	NA	NA	chr15:80215358-80216500	Island	C15orf37;ST20	NR_028330;NM_001100880	Body;TSS1500			15:78002414-78003533	15:80215024-80216706	Promoter_Associated	-0.824614	-2.25881	-10.8162	1.67704e-19	2.10917e-16	33.744
cg18089569	chr11	14996490	+	cg18089569	NA	NA	NA	NA	NA	NA	chr11:14995128-14995908	S_Shore						11:14952859-14953133	11:14996225-14996814	Unclassified_Cell_type_specific	-0.821738	-1.43073	-15.7537	4.03075e-31	3.38634e-26	59.668
cg11416012	chr12	4380899	-	cg11416012	NA	NA	NA	NA	NA	NA	chr12:4378366-4382222	Island						12:4251088-4251182	12:4380732-4381065	Unclassified	-0.820888	-1.11012	-9.26237	9.04663e-16	3.51217e-13	25.378
cg11297934	chr3	12705869	-	cg11297934	rs3806661	0.303494	NA	NA	NA	NA	chr3:12705059-12705887	Island	RAF1	NM_002880	TSS200			3:12679585-12681046			-0.816559	-2.87706	-10.7778	2.07607e-19	2.573e-16	33.5363
cg21625563	chr22	39152448	-	cg21625563	rs7284966	0.451211	NA	NA	NA	NA	chr22:39151457-39152476	Island	UNC84B	NM_015374	TSS1500				22:39150531-39152500	Promoter_Associated	-0.814977	-1.80322	-13.1031	5.54702e-25	3.1068e-21	46.0051
cg21051989	chr6	90121833	-	cg21051989	NA	NA	NA	NA	NA	NA	chr6:90120874-90122370	Island	RRAGD;RRAGD	NM_021244;NM_021244	5'UTR;1stExon		TRUE	6:90177594-90179089			-0.812644	-2.20521	-8.97723	4.30708e-15	1.36034e-12	23.8586
cg23097686	chr12	98910128	-	cg23097686	NA	NA	NA	NA	NA	NA	chr12:98909052-98910261	Island	TMPO;TMPO;TMPO;LOC100128191	NM_001032283;NM_001032284;NM_003276;NR_027157	Body;Body;Body;TSS200			12:97432985-97434488	12:98908594-98910616	Promoter_Associated	-0.811617	-1.60926	-10.2631	3.61042e-18	2.92218e-15	30.7564
cg01176458	chr3	27763828	+	cg01176458	NA	NA	NA	NA	NA	NA	chr3:27762351-27763995	Island	EOMES	NM_005442	TSS200			3:27737356-27739275	3:27763677-27764010	Unclassified	-0.811381	-0.413359	-9.07323	2.54917e-15	8.66356e-13	24.3693
cg07075512	chr4	146402943	-	cg07075512	rs12646702	0.266692	NA	NA	NA	NA	chr4:146402870-146403983	Island	SMAD1;SMAD1	NM_001003688;NM_005900	TSS1500;TSS200			4:146622170-146623433	4:146402674-146403753	Promoter_Associated	-0.81088	-2.26355	-6.60811	1.09505e-09	6.58069e-08	11.7633
cg13275176	chr2	97534450	-	cg13275176	NA	NA	NA	NA	NA	NA	chr2:97534100-97536270	Island	SEMA4C	NM_017789	5'UTR			2:96897857-96899985	2:97534249-97534525	Promoter_Associated	-0.807799	-0.856895	-8.0227	7.423e-13	1.21046e-10	18.8472
cg05660570	chr19	50432873	-	cg05660570	NA	NA	NA	NA	NA	NA	chr19:50432354-50433138	Island	NUP62;NUP62;NUP62;IL4I1;ATF5;NUP62	NM_153718;NM_016553;NM_153719;NM_172374;NM_012068;NM_012346	TSS200;TSS200;TSS200;TSS200;5'UTR;TSS200			19:55124178-55125246	19:50431808-50433800	Promoter_Associated	-0.806723	-3.28149	-8.99129	3.98891e-15	1.27228e-12	23.9333
cg26080798	chr6	20402092	-	cg26080798	NA	NA	NA	NA	NA	NA	chr6:20402003-20403886	Island	E2F3	NM_001949	TSS200			6:20509374-20510336	6:20400625-20402148	Promoter_Associated	-0.806214	-2.43181	-7.95566	1.05993e-12	1.64903e-10	18.5008
cg23837253	chr19	47759802	-	cg23837253	NA	NA	NA	NA	NA	NA	chr19:47759648-47761016	Island	CCDC9;CCDC9	NM_015603;NM_015603	5'UTR;1stExon			19:52451299-52452839	19:47759382-47761260	Promoter_Associated	-0.805745	-1.3068	-12.1029	1.34455e-22	3.76531e-19	40.6759
cg08026941	chr19	17336882	+	cg08026941	rs7254151	0.238563	NA	NA	NA	NA	chr19:17336906-17337868	N_Shore	OCEL1	NM_024578	TSS200				19:17336707-17338163	Promoter_Associated	-0.802594	-1.84477	-9.30411	7.19456e-16	2.87553e-13	25.601
cg20658100	chr13	74707145	+	cg20658100	NA	NA	NA	NA	NA	NA	chr13:74708001-74709601	N_Shore	KLF12	NM_007249	5'UTR	DMR		13:73604997-73605451	13:74706996-74708147	Promoter_Associated	-0.802421	-1.61677	-8.03276	7.03605e-13	1.16042e-10	18.8993
cg13987042	chr11	74660265	+	cg13987042	rs643807	0.274952	NA	NA	NA	NA	chr11:74659931-74660373	Island	XRRA1;SPCS2	NM_182969;NM_014752	TSS200;TSS200			11:74337502-74338279	11:74659597-74660914	Promoter_Associated	-0.8011	-0.605064	-7.95211	1.08004e-12	1.67473e-10	18.4825
cg22559639	chr12	53895182	-	cg22559639	NA	NA	NA	NA	NA	NA	chr12:53894450-53895313	Island	TARBP2;TARBP2;TARBP2;TARBP2	NM_134323;NM_134324;NM_134323;NM_004178	1stExon;TSS200;5'UTR;5'UTR			12:52180718-52181580	12:53894352-53895514	Promoter_Associated	-0.800438	-2.32323	-8.96533	4.59612e-15	1.4408e-12	23.7954
cg19235966	chr1	16173721	-	cg19235966	NA	NA	NA	NA	NA	NA	chr1:16173889-16175396	N_Shore	SPEN;FLJ37453	NM_015001;NR_024279	TSS1500;Body			1:16046263-16047983	1:16173682-16176432	Promoter_Associated	-0.799576	-2.26513	-9.05381	2.83485e-15	9.49616e-13	24.2659
cg07761912	chr1	179846929	+	cg07761912	NA	NA	NA	NA	NA	NA	chr1:179846879-179847106	Island	TOR1AIP2;TOR1AIP2;TOR1AIP2;TOR1AIP2	NM_145034;NM_145034;NM_022347;NM_022347	5'UTR;1stExon;1stExon;5'UTR			1:178113503-178113729	1:179846680-179847259	Promoter_Associated	-0.798963	-1.74508	-9.28363	8.05034e-16	3.18124e-13	25.4916
cg04207741	chr12	57482553	+	cg04207741	NA	NA	NA	NA	NA	NA	chr12:57480797-57483116	Island	NAB2	NM_005967	TSS200			12:55767044-55769510	12:57482230-57482937	Promoter_Associated	-0.798906	-2.13556	-11.0008	6.01893e-20	8.96574e-17	34.7411
cg18761994	chr6	24911326	-	cg18761994	NA	NA	NA	NA	NA	NA	chr6:24910626-24911285	S_Shore	FAM65B	NM_014722	TSS200	DMR		6:25018606-25019551	6:24910730-24911608	Promoter_Associated	-0.79606	-1.89286	-9.76446	5.70082e-17	3.18022e-14	28.0697
cg26618056	chr16	25043323	-	cg26618056	rs11074669	0.000228	NA	NA	NA	NA	chr16:25043130-25043439	Island						16:24950308-24951089	16:25042601-25043485	Promoter_Associated	-0.795217	-1.59828	-9.65408	1.04837e-16	5.43031e-14	27.4765
cg14528979	chr9	139390733	-	cg14528979	NA	NA	NA	NA	NA	NA	chr9:139391402-139391987	N_Shore	NOTCH1	NM_017617	Body			9:138510286-138510686	9:139390576-139390880	Unclassified_Cell_type_specific	-0.794941	2.56568	-4.92328	2.71471e-06	3.85566e-05	4.23602
cg26141063	chr18	32870200	-	cg26141063	rs73426565	0.059012	NA	NA	NA	NA	chr18:32870175-32870512	Island	ZNF271;ZNF397OS;ZNF397OS;ZNF271	NR_024565;NM_001112734;NM_001166012;NR_024566	TSS200;TSS200;TSS200;TSS200			18:31124083-31124510	18:32869456-32870638	NonGene_Associated	-0.793837	-2.48277	-7.79448	2.48681e-12	3.45444e-10	17.6716
cg26642667	chr7	127292389	+	cg26642667	NA	NA	NA	NA	NA	NA	chr7:127291647-127292551	Island	SND1;SND1	NM_014390;NM_014390	5'UTR;1stExon			7:127078611-127079983	7:127291150-127292962	Promoter_Associated	-0.793574	0.215045	-9.19175	1.33242e-15	4.94437e-13	25.001
cg14599755	chr6	33216648	+	cg14599755	NA	NA	NA	NA	NA	NA	chr6:33216103-33217463	Island						6:33324082-33325607	6:33215783-33217632	Promoter_Associated	-0.793254	-0.703011	-9.22316	1.12171e-15	4.25261e-13	25.1686
cg20314548	chr15	74426273	+	cg20314548	NA	NA	NA	NA	NA	NA	chr15:74425091-74428821	Island	ISLR2;ISLR2;ISLR2;ISLR2	NM_001130138;NM_020851;NM_001130136;NM_001130137	Body;Body;Body;Body			15:72211659-72214800			-0.793208	-0.550947	-9.76389	5.71891e-17	3.18609e-14	28.0667
cg20910303	chr4	147443095	+	cg20910303	NA	NA	NA	NA	NA	NA	chr4:147443091-147444062	Island	SLC10A7;SLC10A7;SLC10A7;SLC10A7	NM_032128;NM_001029998;NM_001029998;NM_032128	1stExon;1stExon;5'UTR;5'UTR			4:147662397-147663447	4:147442717-147443288	Promoter_Associated	-0.791212	-1.45501	-8.57511	3.83024e-14	9.17769e-12	21.7313
cg14409559	chr8	72756341	+	cg14409559	NA	NA	NA	NA	NA	NA	chr8:72755783-72756667	Island	MSC	NM_005098	1stExon	DMR		8:72918070-72919559	8:72755516-72756568	Promoter_Associated	-0.789391	-2.74415	-13.6953	2.22345e-26	1.74373e-22	49.1224
cg26853401	chr4	84206199	+	cg26853401	NA	NA	NA	NA	NA	NA	chr4:84205381-84206020	S_Shore	COQ2	NM_015697	TSS200				4:84204992-84206809	Promoter_Associated	-0.788643	-1.64342	-13.1659	3.93728e-25	2.36273e-21	46.3375
cg18151676	chr14	45722704	-	cg18151676	rs34097926	0.028671	NA	NA	NA	NA	chr14:45722148-45722802	Island	C14orf106	NM_018353	TSS200			14:44791928-44792572	14:45721819-45723634	Promoter_Associated	-0.788495	-3.07182	-8.79375	1.17024e-14	3.28155e-12	22.8855
cg16527491	chr14	38065127	-	cg16527491	NA	NA	NA	NA	NA	NA	chr14:38063663-38065665	Island	FOXA1	NM_004496	TSS1500			14:37134847-37134953	14:38065018-38065363	Unclassified_Cell_type_specific	-0.788043	-1.72171	-9.94123	2.14591e-17	1.37832e-14	29.0211
cg25695041	chr4	68567439	+	cg25695041	NA	NA	NA	NA	NA	NA	chr4:68566603-68567076	S_Shore	UBA6;LOC550112	NM_018227;NR_015439	TSS1500;Body				4:68566326-68567538	Promoter_Associated	-0.787206	-1.66072	-12.6534	6.49772e-24	2.55892e-20	43.6179
cg06463759	chr7	128502823	-	cg06463759	NA	NA	NA	NA	NA	NA	chr7:128502715-128503276	Island	ATP6V1F	NM_004231	TSS200			7:128289874-128290563	7:128502342-128504017	Promoter_Associated	-0.787193	-1.95768	-8.66299	2.37997e-14	6.01527e-12	22.1945
cg14317554	chr3	184870948	+	cg14317554	NA	NA	NA	NA	NA	NA	chr3:184870185-184871525	Island	C3orf70	NM_001025266	TSS200			3:186352831-186354344	3:184870312-184871179	Unclassified_Cell_type_specific	-0.784743	-0.589703	-12.0922	1.42627e-22	3.96771e-19	40.6185
cg24714147	chr19	14629240	+	cg24714147	NA	NA	NA	NA	NA	NA	chr19:14628406-14629689	Island	DNAJB1	NM_006145	TSS200			19:14489369-14490689	19:14628031-14629908	Promoter_Associated	-0.784615	-2.83842	-8.23387	2.40441e-13	4.52918e-11	19.9437
ch.14.83852056F	chr14	84782303	+	ch.14.83852056F	NA	NA	NA	NA	NA	NA		OpenSea									-0.781652	-3.42923	-4.67431	7.71079e-06	8.91851e-05	3.24034
cg14292528	chr6	33267539	+	cg14292528	NA	NA	NA	NA	NA	NA	chr6:33266302-33267582	Island	TAPBP;TAPBP;RGL2;RGL2	NM_172209;NM_003190;NM_004761;NR_028387	3'UTR;3'UTR;TSS1500;TSS1500			6:33374048-33375795	6:33266502-33267964	Promoter_Associated	-0.780135	-2.20049	-7.74053	3.3045e-12	4.43624e-10	17.3952
cg01884537	chr3	9005400	+	cg01884537	NA	NA	NA	NA	NA	NA	chr3:9004864-9005270	S_Shore	RAD18	NM_020165	TSS1500			3:8980400-8980432	3:9004326-9005756	Promoter_Associated	-0.779061	-1.01981	-8.98773	4.06724e-15	1.2953e-12	23.9144
cg07560662	chr1	117113232	-	cg07560662	NA	NA	NA	NA	NA	NA	chr1:117112960-117113883	Island	CD58;CD58;CD58	NM_001779;NR_026665;NM_001144822	Body;Body;Body			1:116914377-116915394	1:117112354-117114126	Promoter_Associated	-0.777803	-0.9268	-10.6326	4.64863e-19	5.14906e-16	32.7518
cg08761248	chr12	56615735	+	cg08761248	NA	NA	NA	NA	NA	NA	chr12:56615523-56615767	Island	RNF41;RNF41;RNF41	NM_194359;NM_005785;NM_194358	TSS200;TSS200;TSS200			12:54901730-54902523	12:56614843-56616697	Promoter_Associated	-0.777714	-2.77926	-8.44555	7.70945e-14	1.69287e-11	21.0505
cg14848772	chr6	27099813	+	cg14848772	NA	NA	NA	NA	NA	NA	chr6:27100174-27101124	N_Shore	HIST1H2AG	NM_021064	TSS1500			6:27207678-27207793	6:27099581-27100009	Promoter_Associated	-0.776611	-2.15614	-8.05551	6.23362e-13	1.03951e-10	19.017
cg02092906	chr6	83903419	+	cg02092906	NA	NA	NA	NA	NA	NA	chr6:83902606-83903777	Island	PGM3;RWDD2A	NM_015599;NM_033411	TSS1500;5'UTR			6:83959326-83960647			-0.776109	-1.85495	-9.81783	4.2453e-17	2.44771e-14	28.3568
cg04570283	chr14	82000256	+	cg04570283	NA	NA	NA	NA	NA	NA	chr14:81999751-82000434	Island	SEL1L	NM_005065	TSS200			14:81069505-81070290	14:81999443-82000971	Promoter_Associated	-0.775237	-0.472468	-9.83334	3.8966e-17	2.27652e-14	28.4403
cg10168434	chr2	71295172	+	cg10168434	NA	NA	NA	NA	NA	NA	chr2:71295160-71296002	Island	NAGK	NM_017567	TSS1500			2:71148669-71149611	2:71294819-71296385	Promoter_Associated	-0.77432	-0.778748	-10.9534	7.83057e-20	1.11882e-16	34.4851
cg07010552	chr17	7358735	-	cg07010552	NA	NA	NA	NA	NA	NA		OpenSea	CHRNB1	NM_000747	Body			17:7299218-7299996	17:7358489-7359440	Promoter_Associated	-0.773535	-1.99158	-7.37643	2.21359e-11	2.32463e-09	15.5473
cg04098458	chr2	149402448	-	cg04098458	NA	NA	NA	NA	NA	NA	chr2:149401671-149403498	Island	EPC2	NM_015630	TSS200			2:149118180-149119554	2:149401773-149402666	Promoter_Associated	-0.773096	-0.782169	-8.38597	1.06261e-13	2.23293e-11	20.7383
cg22792862	chr14	67827087	-	cg22792862	NA	NA	NA	NA	NA	NA	chr14:67826139-67827526	Island	EIF2S1;EIF2S1;ATP6V1D	NM_004094;NM_004094;NM_015994	1stExon;5'UTR;TSS1500			14:66896707-66897414	14:67825704-67827557	Promoter_Associated	-0.773016	0.215909	-10.6755	3.66222e-19	4.15775e-16	32.9839
cg08128577	chr16	27413459	-	cg08128577	NA	NA	NA	NA	NA	NA		OpenSea	IL21R;IL21R	NM_181079;NM_181078	TSS1500;TSS1500		TRUE		16:27413155-27414144	Promoter_Associated	-0.772535	-2.16077	-9.16228	1.56585e-15	5.65085e-13	24.8438
cg15988843	chr1	1092940	-	cg15988843	NA	NA	NA	NA	NA	NA	chr1:1093211-1093476	N_Shore					TRUE	1:1082623-1083899	1:1092690-1093661	Promoter_Associated	-0.77116	-2.30897	-7.41039	1.85621e-11	1.99266e-09	15.7183
cg26748024	chr6	42420298	-	cg26748024	NA	NA	NA	NA	NA	NA	chr6:42420075-42421090	Island	TRERF1	NM_033502	TSS1500			6:42527940-42529855	6:42420264-42420304	Promoter_Associated	-0.77067	-0.908715	-8.28297	1.84799e-13	3.60555e-11	20.1998
cg02339297	chr12	56615275	-	cg02339297	rs2629450	0.162472	NA	NA	NA	NA	chr12:56615523-56615767	N_Shore	RNF41;RNF41;RNF41	NM_194358;NM_194359;NM_005785	5'UTR;5'UTR;5'UTR				12:56614843-56616697	Promoter_Associated	-0.770573	-1.66641	-9.61547	1.29714e-16	6.58067e-14	27.2692
cg15554466	chr19	39936040	-	cg15554466	rs1865092	0.38741	NA	NA	NA	NA	chr19:39935931-39936638	Island	SUPT5H;SUPT5H;SUPT5H;SUPT5H	NM_003169;NM_001111020;NM_001130825;NM_001130824	TSS1500;TSS200;TSS200;TSS200			19:44627683-44628443	19:39935715-39936723	Promoter_Associated	-0.769698	-2.79611	-9.32915	6.27018e-16	2.55221e-13	25.7349
cg01373262	chr20	44034880	-	cg01373262	NA	NA	NA	NA	NA	NA	chr20:44034458-44035954	Island	DBNDD2;DBNDD2;DBNDD2;SYS1-DBNDD2;DBNDD2	NM_001048223;NM_001048222;NM_001048224;NR_003189;NM_001048221	TSS1500;5'UTR;TSS1500;Body;5'UTR			20:43467659-43469389			-0.76659	-1.12599	-8.69797	1.96879e-14	5.15276e-12	22.3791
cg19367466	chr12	123717773	+	cg19367466	NA	NA	NA	NA	NA	NA	chr12:123717367-123718388	Island	C12orf65;C12orf65	NM_152269;NM_001143905	TSS200;TSS1500			12:122283128-122284341	12:123716897-123718892	Promoter_Associated	-0.76588	-1.99619	-10.9741	6.97911e-20	1.01092e-16	34.5971
cg25080152	chr8	128748155	-	cg25080152	NA	NA	NA	NA	NA	NA	chr8:128747805-128751279	Island	MYC	NM_002467	TSS200			8:128816988-128817985	8:128747920-128748208	Unclassified	-0.765686	-1.52743	-13.4309	9.31439e-26	6.21054e-22	47.7347
cg23894553	chr22	29280180	-	cg23894553	NA	NA	NA	NA	NA	NA	chr22:29279412-29280287	Island	ZNRF3	NM_032173	5'UTR			22:27608930-27611013			-0.765193	-1.82819	-7.29639	3.34868e-11	3.33569e-09	15.1453
cg05388492	chr1	217309160	+	cg05388492	NA	NA	NA	NA	NA	NA	chr1:217307744-217309179	Island	ESRRG	NM_001134285	5'UTR			1:215374046-215375916			-0.765063	-1.58151	-8.17156	3.35594e-13	6.08421e-11	19.6194
cg23222197	chr11	64578325	-	cg23222197	rs11231874	0.130931	NA	NA	NA	NA	chr11:64577277-64578349	Island	MEN1;MEN1;MEN1;MEN1;MEN1;MEN1;MEN1;MEN1	NM_130802;NM_130803;NM_130799;NM_000244;NM_130801;NM_130804;NM_130803;NM_130800	TSS200;1stExon;TSS200;TSS200;TSS1500;5'UTR;5'UTR;TSS1500			11:64333854-64334925	11:64577500-64578661	Promoter_Associated	-0.764427	-1.82131	-11.2729	1.32945e-20	2.27013e-17	36.2102
cg16968413	chr4	39183824	+	cg16968413	NA	NA	NA	NA	NA	NA	chr4:39183823-39184225	Island	WDR19	NM_025132	TSS200			4:38860082-38861021	4:39183346-39184767	Promoter_Associated	-0.76386	-3.14509	-7.99007	8.82893e-13	1.40748e-10	18.6785
cg24109273	chr6	43484729	-	cg24109273	NA	NA	NA	NA	NA	NA	chr6:43484561-43484887	Island	YIPF3;POLR1C;POLR1C	NM_015388;NM_004875;NM_203290	TSS200;TSS200;TSS200			6:43592457-43593194	6:43484144-43485306	Promoter_Associated	-0.762707	-1.93403	-8.22727	2.4909e-13	4.6837e-11	19.9094
cg11835068	chr1	4714974	+	cg11835068	rs61765001	0.252684	NA	NA	NA	NA	chr1:4713989-4716555	Island	AJAP1;AJAP1	NM_018836;NM_001042478	TSS200;TSS200			1:4613765-4616584			-0.760538	-1.32891	-7.54886	9.02727e-12	1.07453e-09	16.4186
cg01947301	chr1	205718900	+	cg01947301	NA	NA	NA	NA	NA	NA	chr1:205718238-205719345	Island	NUCKS1	NM_022731	Body			1:203984803-203986188	1:205718230-205718958	Promoter_Associated	-0.760512	-1.70143	-8.47384	6.61886e-14	1.48127e-11	21.199
cg22996605	chr6	43138883	+	cg22996605	NA	NA	NA	NA	NA	NA	chr6:43138711-43140292	Island	SRF	NM_003131	TSS200			6:43246062-43248270	6:43138147-43139347	Promoter_Associated	-0.760327	-0.62722	-13.0228	8.59878e-25	4.63082e-21	45.58
cg02275878	chr17	72919391	+	cg02275878	NA	NA	NA	NA	NA	NA	chr17:72918995-72921019	Island	OTOP2;USH1G	NM_178160;NM_173477	TSS1500;TSS200		TRUE	17:70430618-70432614	17:72919298-72920747	Unclassified	-0.759807	-0.316793	-8.97208	4.42986e-15	1.39283e-12	23.8312
cg25622749	chr1	224517955	+	cg25622749	rs73118072	0.028741	NA	NA	NA	NA	chr1:224517729-224518193	Island	NVL;NVL	NM_206840;NM_002533	TSS200;TSS200			1:222584211-222584951	1:224517483-224518640	Promoter_Associated	-0.759044	-2.01165	-9.76979	5.53557e-17	3.10868e-14	28.0984
cg17309592	chr3	49591741	+	cg17309592	NA	NA	NA	NA	NA	NA	chr3:49591578-49592534	Island	BSN	NM_003458	TSS200			3:49566545-49567521	3:49591105-49592556	Promoter_Associated	-0.757494	-0.723304	-9.87472	3.09982e-17	1.87637e-14	28.663
cg26801646	chr10	76970496	-	cg26801646	NA	NA	NA	NA	NA	NA	chr10:76969992-76971002	Island	VDAC2	NM_003375	TSS200			10:76639769-76641167	10:76969589-76971446	Unclassified	-0.757342	-2.3715	-7.53949	9.47992e-12	1.12016e-09	16.371
cg13886636	chr9	130679606	-	cg13886636	NA	NA	NA	NA	NA	NA	chr9:130679120-130679612	Island	ST6GALNAC4;ST6GALNAC4	NM_175039;NM_175040	TSS1500;TSS1500			9:129718778-129719493	9:130678022-130679951	Promoter_Associated	-0.756515	-1.11737	-10.3258	2.54908e-18	2.20325e-15	31.0953
cg17120908	chr11	65337727	-	cg17120908	rs59286748	0.290602	NA	NA	NA	NA	chr11:65337213-65338474	Island	SSSCA1	NM_006396	TSS1500			11:65093790-65095017	11:65337106-65338188	Promoter_Associated	-0.756261	-1.67471	-9.1492	1.68218e-15	6.01383e-13	24.774
cg19187155	chr2	232395269	+	cg19187155	NA	NA	NA	NA	NA	NA	chr2:232394763-232395337	Island	NMUR1	NM_006056	TSS200			2:232103024-232103727	2:232394920-232396293	Unclassified	-0.754253	-2.81601	-4.89817	3.02057e-06	4.19701e-05	4.13404
cg13984515	chr1	86046961	-	cg13984515	rs2297141	0.458115	NA	NA	NA	NA	chr1:86046362-86047240	Island	CYR61	NM_001554	Body			1:85818724-85819828	1:86046913-86047114	Unclassified	-0.751109	-2.27149	-7.34501	2.60461e-11	2.68163e-09	15.3893
cg03698702	chr19	36236336	+	cg03698702	NA	NA	NA	NA	NA	NA	chr19:36235807-36236548	Island	PSENEN;U2AF1L4;U2AF1L4	NM_172341;NM_144987;NM_001040425	TSS200;TSS200;TSS200			19:40927648-40928542	19:36235110-36236720	Promoter_Associated	-0.748055	-1.44357	-9.79854	4.7226e-17	2.68443e-14	28.2531
cg18720622	chr5	1229256	+	cg18720622	NA	NA	NA	NA	NA	NA	chr5:1226976-1227305	S_Shore	SLC6A18	NM_182632	Body			5:1282095-1282272			-0.747525	1.53154	-8.16924	3.39785e-13	6.15221e-11	19.6073
cg19874450	chr17	34900926	+	cg19874450	NA	NA	NA	NA	NA	NA	chr17:34900150-34901450	Island	GGNBP2;GGNBP2	NM_024835;NM_024835	1stExon;5'UTR			17:31974170-31976140			-0.7464	-2.2486	-8.67542	2.22486e-14	5.71262e-12	22.2601
cg25632300	chr5	174905618	-	cg25632300	NA	NA	NA	NA	NA	NA	chr5:174905342-174906065	Island	SFXN1;SFXN1	NM_022754;NM_022754	1stExon;5'UTR			5:174837796-174838671	5:174905402-174906107	Promoter_Associated	-0.745928	-1.97037	-9.62104	1.25795e-16	6.40508e-14	27.2991
cg19835839	chr12	120966954	-	cg19835839	rs3742052	0.251949	NA	NA	NA	NA	chr12:120966788-120967038	Island	COQ5;COQ5	NM_032314;NM_032314	1stExon;5'UTR			12:119451172-119451489	12:120966628-120967706	Promoter_Associated_Cell_type_specific	-0.742719	-2.56945	-9.19979	1.275e-15	4.77345e-13	25.0439
cg06679760	chr3	49027156	+	cg06679760	NA	NA	NA	NA	NA	NA	chr3:49027116-49028356	Island	P4HTM;P4HTM	NM_177939;NM_177938	TSS200;TSS200			3:49002134-49003360	3:49026839-49028774	Promoter_Associated	-0.742465	-2.10042	-10.1134	8.27253e-18	6.04347e-15	29.9492
cg22876894	chr20	1783624	-	cg22876894	NA	NA	NA	NA	NA	NA	chr20:1783824-1784552	N_Shore				DMR		20:1731337-1732544	20:1781824-1783803	Unclassified	-0.740797	-1.62224	-14.4272	4.35924e-28	6.10387e-24	52.9268
cg21393421	chr1	6259179	+	cg21393421	NA	NA	NA	NA	NA	NA	chr1:6259178-6259883	Island	RPL22	NM_000983	Body			1:6181610-6182470	1:6258819-6260263	Promoter_Associated	-0.739906	-1.96038	-8.18618	3.10366e-13	5.68572e-11	19.6954
cg19861138	chr2	154335384	-	cg19861138	NA	NA	NA	NA	NA	NA	chr2:154334449-154335458	Island	RPRM	NM_019845	TSS200	DMR	TRUE	2:154042488-154043953	2:154334733-154335809	Unclassified	-0.739665	-2.16213	-8.66515	2.35233e-14	5.95976e-12	22.2059
cg06084907	chr16	3551038	-	cg06084907	rs79384355	0.05032	NA	NA	NA	NA	chr16:3550773-3551274	Island	CLUAP1;CLUAP1	NM_015041;NM_015041	5'UTR;1stExon			16:3490775-3491322	16:3550597-3551476	Promoter_Associated	-0.739214	-3.04774	-8.00953	7.9616e-13	1.28928e-10	18.7791
cg19400545	chr4	124319236	+	cg19400545	NA	NA	NA	NA	NA	NA	chr4:124318307-124319998	Island	SPRY1;SPRY1	NM_199327;NM_005841	5'UTR;TSS1500			4:124538486-124539580	4:124318402-124320293	Promoter_Associated	-0.739009	-3.06356	-9.39106	4.4623e-16	1.89339e-13	26.0661
cg25613101	chr22	38577875	+	cg25613101	NA	NA	NA	NA	NA	NA	chr22:38577678-38578071	Island	PLA2G6;PLA2G6	NM_001004426;NM_003560	TSS200;TSS200			22:36907508-36908017	22:38576873-38578259	Promoter_Associated	-0.738511	-2.01503	-9.32545	6.39908e-16	2.59462e-13	25.7151
cg23606758	chr1	52869977	+	cg23606758	NA	NA	NA	NA	NA	NA	chr1:52869867-52870305	Island	ORC1L;PRPF38A;ORC1L	NM_004153;NM_032864;NM_004153	1stExon;TSS1500;5'UTR			1:52642232-52642893	1:52869777-52870979	Promoter_Associated	-0.737512	-1.70741	-9.83828	3.7916e-17	2.23069e-14	28.4669
cg18367020	chr2	73461259	-	cg18367020	NA	NA	NA	NA	NA	NA	chr2:73460085-73461867	Island	CCT7;CCT7;CCT7;C2orf7;CCT7;CCT7;CCT7	NR_029402;NM_001166285;NM_006429;NM_032319;NM_001009570;NR_029403;NM_001166284	TSS200;TSS200;TSS200;TSS1500;TSS200;TSS200;TSS200			2:73313472-73315538	2:73461125-73461752	Promoter_Associated	-0.73702	-2.37936	-9.89958	2.70184e-17	1.67643e-14	28.7968
cg05064645	chr7	55086868	+	cg05064645	NA	NA	NA	NA	NA	NA	chr7:55086141-55088105	Island	EGFR;EGFR;EGFR;EGFR;EGFR;EGFR;EGFR;EGFR	NM_201282;NM_005228;NM_201282;NM_005228;NM_201283;NM_201283;NM_201284;NM_201284	5'UTR;5'UTR;1stExon;1stExon;1stExon;5'UTR;1stExon;5'UTR			7:55053636-55055599	7:55086856-55087148	Unclassified	-0.73495	-2.11752	-7.83029	2.05853e-12	2.93223e-10	17.8553
cg03519263	chr14	21152327	+	cg03519263	rs117466368	0.019097	NA	NA	NA	NA	chr14:21152483-21152740	N_Shore	RNASE4;ANG	NM_002937;NM_001145	TSS200;TSS200						-0.734457	-2.39378	-13.6818	2.3912e-26	1.82629e-22	49.0519
cg14041007	chr2	44001147	+	cg14041007	rs75684735	0.0124	NA	NA	NA	NA		OpenSea	DYNC2LI1;DYNC2LI1;DYNC2LI1	NM_001012665;NM_016008;NM_015522	TSS200;TSS200;TSS200			2:43854635-43854858	2:44000934-44001753	Promoter_Associated	-0.734326	-2.86949	-7.80611	2.33879e-12	3.27917e-10	17.7312
cg05629721	chr6	32812280	-	cg05629721	NA	NA	NA	NA	NA	NA	chr6:32811494-32811839	S_Shore	PSMB8;PSMB8;PSMB8	NM_004159;NM_148919;NM_004159	5'UTR;TSS1500;1stExon			6:32919512-32920687	6:32811563-32813032	Promoter_Associated	-0.733403	-2.37315	-12.2974	4.59975e-23	1.47495e-19	41.7178
cg03278965	chr3	141595308	-	cg03278965	NA	NA	NA	NA	NA	NA	chr3:141594486-141596288	Island	ATP1B3	NM_001679	TSS200			3:143077476-143078978	3:141593935-141595586	Promoter_Associated	-0.733016	-1.57814	-11.8347	5.91695e-22	1.4367e-18	39.236
cg16261091	chr17	80375750	+	cg16261091	NA	NA	NA	NA	NA	NA	chr17:80376412-80376761	N_Shore	C17orf101;HEXDC;C17orf101	NM_175902;NM_173620;NM_024648	Body;TSS1500;Body				17:80375658-80377071	Promoter_Associated	-0.732767	2.73085	-4.68576	7.35467e-06	8.57627e-05	3.28536
cg04981696	chr16	16044519	-	cg04981696	NA	NA	NA	NA	NA	NA	chr16:16043218-16043927	S_Shore	ABCC1;ABCC1;ABCC1;ABCC1;ABCC1	NM_019862;NM_019898;NM_019899;NM_004996;NM_019900	Body;Body;Body;Body;Body				16:16044271-16044559	Promoter_Associated	-0.731841	-1.55998	-12.4479	2.00856e-23	7.46657e-20	42.5224
cg22691505	chr7	6312217	-	cg22691505	NA	NA	NA	NA	NA	NA	chr7:6311322-6312526	Island	CYTH3;CYTH3	NM_004227;NM_004227	5'UTR;1stExon			7:6277848-6279051	7:6312134-6312424	Promoter_Associated	-0.73102	-1.07576	-9.39541	4.35672e-16	1.8542e-13	26.0895
cg08128228	chr1	167191360	+	cg08128228	NA	NA	NA	NA	NA	NA	chr1:167189130-167191361	Island	POU2F1	NM_002697	5'UTR			1:165455766-165458146			-0.730945	-2.60976	-11.5388	3.04484e-21	6.14918e-18	37.6435
cg12855008	chr22	18893816	-	cg12855008	NA	NA	NA	NA	NA	NA	chr22:18893251-18894291	Island	DGCR6;DGCR6	NM_005675;NM_005675	5'UTR;1stExon			22:17273141-17274417	22:18893210-18894551	Promoter_Associated	-0.730532	-3.11794	-10.2006	5.10495e-18	3.93469e-15	30.4192
cg03637614	chr7	129691233	+	cg03637614	NA	NA	NA	NA	NA	NA	chr7:129690960-129691326	Island	ZC3HC1	NM_016478	TSS200		TRUE	7:129478122-129478562	7:129690558-129691560	Promoter_Associated	-0.729854	-1.46174	-8.6608	2.40845e-14	6.0763e-12	22.1829
cg23505966	chr3	101443535	-	cg23505966	NA	NA	NA	NA	NA	NA	chr3:101443478-101443859	Island	CEP97	NM_024548	1stExon			3:102926015-102926947	3:101443233-101444656	Promoter_Associated_Cell_type_specific	-0.729776	-2.75119	-8.23495	2.39055e-13	4.50509e-11	19.9494
cg17930550	chr1	67519474	+	cg17930550	NA	NA	NA	NA	NA	NA	chr1:67519224-67520139	Island	SLC35D1	NM_015139	Body			1:67291641-67292781			-0.72847	-0.956001	-5.19326	8.44005e-07	1.51182e-05	5.35399
cg17864958	chr1	224370909	+	cg17864958	NA	NA	NA	NA	NA	NA	chr1:224370585-224371755	Island	DEGS1;DEGS1	NM_144780;NM_003676	TSS200;TSS200			1:222437209-222438430	1:224370652-224371168	Promoter_Associated	-0.727025	-1.81706	-11.025	5.26297e-20	7.89565e-17	34.8717
cg22064581	chr6	34113293	+	cg22064581	NA	NA	NA	NA	NA	NA	chr6:34111735-34113944	Island				DMR		6:34219679-34221887			-0.726688	-2.34601	-8.54157	4.59155e-14	1.07152e-11	21.5549
cg20459655	chr2	135675569	+	cg20459655	NA	NA	NA	NA	NA	NA	chr2:135675772-135677088	N_Shore	CCNT2;CCNT2	NM_058241;NM_001241	TSS1500;TSS1500				2:135675222-135677149	Unclassified	-0.72659	-0.915063	-8.7025	1.921e-14	5.04654e-12	22.403
cg27181554	chr16	1992734	+	cg27181554	NA	NA	NA	NA	NA	NA	chr16:1992668-1993646	Island	SEPX1	NM_016332	Body			16:1932735-1933647	16:1992264-1993818	Promoter_Associated	-0.725684	-0.87069	-7.4088	1.87154e-11	2.00758e-09	15.7103
cg12509004	chr7	129691220	+	cg12509004	NA	NA	NA	NA	NA	NA	chr7:129690960-129691326	Island	ZC3HC1;ZC3HC1	NM_016478;NM_016478	1stExon;5'UTR		TRUE	7:129478122-129478562	7:129690558-129691560	Promoter_Associated	-0.724557	-1.21816	-9.57125	1.65519e-16	8.07532e-14	27.0318
cg18579396	chr17	41623924	-	cg18579396	NA	NA	NA	NA	NA	NA	chr17:41622604-41624165	Island	ETV4;ETV4	NM_001986;NM_001079675	TSS1500;TSS200			17:38978084-38979469	17:41623541-41623957	Promoter_Associated	-0.722983	-2.18198	-9.13041	1.86448e-15	6.576e-13	24.6738
cg00937271	chr4	13529551	-	cg00937271	NA	NA	NA	NA	NA	NA	chr4:13529254-13529865	Island						4:13138307-13138982			-0.722588	-1.79678	-10.7095	3.0329e-19	3.53196e-16	33.1674
cg00730653	chr3	13920053	+	cg00730653	rs7619928	0.011899	NA	NA	NA	NA	chr3:13919939-13922335	Island	WNT7A	NM_004625	Body	DMR		3:13894408-13897503			-0.721301	-2.51446	-6.83462	3.52852e-10	2.51264e-08	12.8606
cg20420867	chr1	160175396	-	cg20420867	NA	NA	NA	NA	NA	NA	chr1:160175132-160175702	Island	PEA15	NM_003768	5'UTR			1:158441732-158442326			-0.720317	-0.587257	-10.4633	1.18892e-18	1.16144e-15	31.8377
cg22603710	chr3	134514098	+	cg22603710	NA	NA	NA	NA	NA	NA	chr3:134514085-134515980	Island	EPHB1	NM_004441	TSS200	CDMR		3:135996374-135999273	3:134513047-134514254	Unclassified	-0.720274	-0.7665	-10.6582	4.03148e-19	4.55237e-16	32.8904
cg26780677	chr11	64546109	-	cg26780677	rs3741398	0.205233	NA	NA	NA	NA	chr11:64545666-64546684	Island	SF1;SF1;SF1;SF1;SF1;SF1;SF1;SF1	NM_201997;NM_004630;NM_201998;NM_201995;NM_004630;NM_201995;NM_201998;NM_201997	5'UTR;1stExon;5'UTR;1stExon;5'UTR;5'UTR;1stExon;1stExon			11:64301696-64303248	11:64545015-64546901	Promoter_Associated	-0.720089	-1.26747	-5.49841	2.15994e-07	5.11422e-06	6.66227
cg27525037	chr1	182361500	-	cg27525037	rs4652706	0.189263	NA	NA	NA	NA	chr1:182359697-182361563	Island	GLUL;GLUL;GLUL	NM_001033044;NM_001033056;NM_002065	TSS200;TSS1500;TSS200			1:180626225-180628186			-0.719456	-1.13921	-7.32279	2.92172e-11	2.96882e-09	15.2777
cg15604682	chr7	102105781	+	cg15604682	rs118047026	0.019531	NA	NA	NA	NA	chr7:102105123-102105782	Island	ALKBH4;LRWD1	NM_017621;NM_152892	TSS1500;Body			7:101891826-101892845	7:102104718-102105992	Promoter_Associated	-0.718852	-1.27187	-11.0622	4.27967e-20	6.51354e-17	35.0729
cg03297593	chr15	48470205	-	cg03297593	NA	NA	NA	NA	NA	NA	chr15:48470007-48470628	Island	MYEF2	NM_016132	Body	DMR		15:46257239-46257905	15:48469733-48471103	Promoter_Associated	-0.718541	-1.25866	-9.33397	6.10661e-16	2.50016e-13	25.7607
cg20563759	chr5	149109601	+	cg20563759	NA	NA	NA	NA	NA	NA	chr5:149109570-149111750	Island	PPARGC1B	NM_133263	TSS1500			5:149089650-149092157			-0.718439	-1.48922	-10.0722	1.03954e-17	7.40127e-15	29.7268
cg10881360	chr1	24069720	-	cg10881360	NA	NA	NA	NA	NA	NA	chr1:24069695-24070615	Island	TCEB3	NM_003198	TSS200			1:23942099-23943314	1:24069269-24071028	Promoter_Associated	-0.717687	-1.57132	-10.317	2.6779e-18	2.28636e-15	31.0473
cg04231958	chr12	109915151	+	cg04231958	rs28384416	0.034309	NA	NA	NA	NA	chr12:109915131-109915638	Island	UBE3B;KCTD10;KCTD10;UBE3B	NM_183415;NM_031954;NM_031954;NM_130466	TSS1500;1stExon;5'UTR;TSS1500			12:108399114-108400225	12:109914680-109916275	Promoter_Associated	-0.717612	-2.60805	-8.5165	5.25765e-14	1.21349e-11	21.423
cg12262069	chr3	5028410	-	cg12262069	NA	NA	NA	NA	NA	NA	chr3:5028409-5028903	Island				CDMR			3:5028135-5029104	Unclassified	-0.717475	-2.12853	-9.65415	1.04797e-16	5.43031e-14	27.4769
cg17771610	chr13	45011050	-	cg17771610	NA	NA	NA	NA	NA	NA	chr13:45011151-45011395	N_Shore	TSC22D1;TSC22D1	NM_006022;NM_183422	TSS200;Body			13:43908850-43909395	13:45010790-45011595	Promoter_Associated	-0.717278	-2.632	-10.3664	2.03577e-18	1.83527e-15	31.3142
cg22794795	chr12	113623087	+	cg22794795	NA	NA	NA	NA	NA	NA	chr12:113622761-113623931	Island	C12orf52;DDX54;DDX54	NM_032848;NM_024072;NM_001111322	TSS1500;1stExon;1stExon			12:112107111-112108303	12:113622444-113624625	Unclassified	-0.717269	-2.84147	-9.50073	2.44076e-16	1.12421e-13	26.6536
cg07791578	chr6	24358308	-	cg07791578	NA	NA	NA	NA	NA	NA	chr6:24357719-24358309	Island	KAAG1;KAAG1;DCDC2	NM_181337;NM_181337;NM_016356	1stExon;3'UTR;TSS200			6:24465734-24466288	6:24357571-24358797	Unclassified_Cell_type_specific	-0.71647	-1.66255	-10.8567	1.33952e-19	1.75291e-16	33.9627
cg18480233	chr2	36584699	-	cg18480233	NA	NA	NA	NA	NA	NA	chr2:36584500-36584982	Island	CRIM1	NM_016441	Body			2:36435842-36438435	2:36584496-36585457	Unclassified	-0.716318	-0.916101	-8.85575	8.35186e-15	2.46371e-12	23.2139
cg05301818	chr8	125385252	-	cg05301818	NA	NA	NA	NA	NA	NA	chr8:125383817-125385437	Island	TMEM65	NM_194291	TSS1500			8:125452860-125454593	8:125384812-125385271	Promoter_Associated	-0.716149	-0.644356	-9.865	3.27101e-17	1.97135e-14	28.6107
cg00001245	chr3	15106710	-	cg00001245	NA	NA	NA	NA	NA	NA	chr3:15106459-15106971	Island	MRPS25;MRPS25	NM_022497;NM_022497	1stExon;5'UTR			3:15080979-15081945	3:15105831-15107388	Promoter_Associated	-0.715939	-2.99852	-10.2845	3.2059e-18	2.66143e-15	30.8721
cg17615061	chr6	31620208	+	cg17615061	NA	NA	NA	NA	NA	NA	chr6:31619856-31620525	Island	BAT3;BAT3;BAT3;BAT3;BAT3;BAT3;BAT3	NM_080702;NM_001098534;NM_004639;NM_080703;NM_080702;NM_080703;NM_004639	1stExon;TSS200;5'UTR;1stExon;5'UTR;5'UTR;1stExon			6:31727741-31728594	6:31619524-31621189	Promoter_Associated	-0.715456	-2.17325	-6.54811	1.47411e-09	8.43393e-08	11.4755
cg17836132	chr15	51201076	+	cg17836132	NA	NA	NA	NA	NA	NA	chr15:51200258-51201270	Island	AP4E1	NM_007347	1stExon			15:48987419-48988649			-0.715307	-2.09508	-9.56923	1.6737e-16	8.14672e-14	27.021
cg25837738	chr7	148725785	+	cg25837738	NA	NA	NA	NA	NA	NA	chr7:148725047-148726161	Island	PDIA4	NM_004911	TSS200			7:148355928-148357129	7:148724913-148726592	Promoter_Associated	-0.714344	-1.78103	-10.4444	1.32091e-18	1.27263e-15	31.7353
cg03512643	chr14	74486160	-	cg03512643	NA	NA	NA	NA	NA	NA	chr14:74485325-74486356	Island	C14orf45;ENTPD5;C14orf45	NM_025057;NM_001249;NM_025057	1stExon;TSS200;5'UTR			14:73555079-73556078	14:74484834-74486773	Promoter_Associated	-0.713853	-2.52459	-8.4434	7.79941e-14	1.71173e-11	21.0392
cg14753321	chr5	176784914	+	cg14753321	NA	NA	NA	NA	NA	NA		OpenSea	RGS14;RGS14	NM_006480;NM_006480	5'UTR;1stExon			5:176717363-176717629	5:176784418-176785470	Promoter_Associated	-0.71331	-2.4639	-9.33983	5.91297e-16	2.43036e-13	25.792
cg02181963	chr13	111358803	+	cg02181963	NA	NA	NA	NA	NA	NA	chr13:111358080-111358894	Island	CARS2	NM_024537	TSS1500			13:110156082-110156864	13:111357549-111359120	Promoter_Associated	-0.71249	-1.51695	-10.8843	1.14919e-19	1.53249e-16	34.1118
cg22228783	chr18	74844034	+	cg22228783	rs7234131	0.065538	NA	NA	NA	NA	chr18:74843360-74845426	Island	MBP;MBP	NM_001025101;NM_001025100	5'UTR;5'UTR			18:72972014-72974414	18:74843693-74845302	Promoter_Associated	-0.710215	-2.90025	-8.66855	2.30932e-14	5.89345e-12	22.2238
cg07113562	chr10	52834093	+	cg07113562	NA	NA	NA	NA	NA	NA	chr10:52833539-52834752	Island	PRKG1;PRKG1	NM_001098512;NM_006258	Body;TSS200			10:52503463-52504827			-0.710157	-1.44499	-9.46989	2.89235e-16	1.30222e-13	26.4883
cg02325540	chr10	94834557	-	cg02325540	NA	NA	NA	NA	NA	NA	chr10:94833272-94835256	Island	CYP26A1;CYP26A1	NM_000783;NM_057157	Body;Body	DMR		10:94823032-94825246			-0.709181	-1.49877	-10.0707	1.04843e-17	7.43932e-15	29.7185
cg02287918	chr21	30396957	+	cg02287918	NA	NA	NA	NA	NA	NA	chr21:30396848-30397410	Island	USP16;USP16;USP16;USP16;USP16;USP16	NM_006447;NM_001001992;NM_001032410;NM_001001992;NM_001032410;NM_006447	5'UTR;5'UTR;5'UTR;1stExon;1stExon;1stExon			21:29318634-29319323	21:30396468-30397866	Promoter_Associated	-0.708912	-2.77115	-8.06625	5.88694e-13	9.89156e-11	19.0727
cg11352190	chr12	45270000	-	cg11352190	NA	NA	NA	NA	NA	NA	chr12:45269830-45270835	Island	NELL2;NELL2;NELL2;NELL2;NELL2;NELL2	NM_001145110;NM_001145108;NM_001145107;NM_001145108;NM_001145109;NM_006159	Body;5'UTR;Body;1stExon;TSS1500;5'UTR			12:43556098-43557102			-0.708514	-2.3788	-10.3664	2.03596e-18	1.83527e-15	31.3141
cg20040772	chr7	100026353	+	cg20040772	rs73403315	0.018756	NA	NA	NA	NA	chr7:100025804-100028002	Island	MEPCE;ZCWPW1	NM_019606;NM_017984	TSS1500;TSS200			7:99863535-99864517	7:100025714-100027642	Promoter_Associated	-0.7085	-2.64318	-8.01853	7.58932e-13	1.23375e-10	18.8256
cg20697630	chr1	20960374	-	cg20697630	NA	NA	NA	NA	NA	NA	chr1:20960045-20960551	Island	PINK1	NM_032409	1stExon			1:20832399-20833138			-0.707808	-0.884836	-11.1959	2.03819e-20	3.35753e-17	35.7945
cg18745566	chr19	1725696	-	cg18745566	rs8111877	0.325117	NA	NA	NA	NA	chr19:1725415-1726154	Island				DMR		19:1676416-1677578	19:1725405-1726422	Unclassified	-0.707476	-1.24421	-9.45879	3.07451e-16	1.37587e-13	26.4289
cg19015611	chr2	71126446	+	cg19015611	NA	NA	NA	NA	NA	NA	chr2:71126720-71129209	N_Shore	VAX2	NM_012476	TSS1500	RDMR					-0.706724	0.530124	-10.2896	3.11564e-18	2.60193e-15	30.8999
cg15672331	chr15	85923765	+	cg15672331	NA	NA	NA	NA	NA	NA	chr15:85923604-85924680	Island	AKAP13;AKAP13	NM_006738;NM_007200	TSS200;TSS200			15:83724467-83725672	15:85922962-85924696	Promoter_Associated	-0.706268	-1.68717	-8.51786	5.21894e-14	1.20522e-11	21.4302
cg02038173	chr21	34852701	+	cg02038173	NA	NA	NA	NA	NA	NA	chr21:34851229-34852702	Island	TMEM50B	NM_006134	TSS1500			21:33773438-33774743	21:34852040-34852861	Promoter_Associated	-0.706206	-1.57179	-9.68619	8.78194e-17	4.63439e-14	27.649
cg05006947	chr16	58718479	-	cg05006947	NA	NA	NA	NA	NA	NA	chr16:58718309-58718703	Island	SLC38A7	NM_018231	5'UTR			16:57275953-57276269	16:58717254-58719146	Promoter_Associated	-0.704487	-1.31995	-8.66348	2.37366e-14	6.00656e-12	22.1971
cg26801816	chr8	141646455	-	cg26801816	NA	NA	NA	NA	NA	NA	chr8:141646075-141646514	Island	EIF2C2;EIF2C2	NM_001164623;NM_012154	TSS1500;TSS1500			8:141715603-141715696	8:141645892-141646515	Promoter_Associated	-0.704435	-2.18495	-10.377	1.91943e-18	1.74143e-15	31.3715
cg14167982	chr11	64684723	+	cg14167982	NA	NA	NA	NA	NA	NA	chr11:64684599-64684826	Island	ATG2A	NM_015104	TSS200			11:64440674-64441621	11:64683553-64685483	Promoter_Associated	-0.703844	-2.58264	-7.0037	1.50001e-10	1.21336e-08	13.6901
cg02405530	chr4	926135	+	cg02405530	NA	NA	NA	NA	NA	NA	chr4:925580-926488	Island	TMEM175;GAK;GAK	NM_032326;NM_005255;NM_005255	TSS200;5'UTR;1stExon			4:915581-916531	4:925363-926927	Promoter_Associated	-0.703741	-2.13553	-9.28267	8.09276e-16	3.19434e-13	25.4865
cg02635865	chr20	56885090	-	cg02635865	NA	NA	NA	NA	NA	NA	chr20:56884738-56885222	Island	RAB22A;PPP4R1L	NM_020673;NR_003505	Body;TSS1500			20:56317199-56318580	20:56883933-56885694	Promoter_Associated	-0.703403	-2.62871	-6.90959	2.41723e-10	1.82296e-08	13.2273
cg06742800	chr2	27255708	+	cg06742800	NA	NA	NA	NA	NA	NA	chr2:27255600-27256121	Island	TMEM214;TMEM214	NM_001083590;NM_017727	TSS200;TSS200			2:27109119-27109648	2:27255008-27256589	Promoter_Associated	-0.702433	-1.29327	-9.00316	3.7385e-15	1.20708e-12	23.9965
cg15839751	chr8	146126984	+	cg15839751	NA	NA	NA	NA	NA	NA	chr8:146126088-146128055	Island	ZNF250;ZNF250	NM_021061;NM_001109689	TSS200;TSS200			8:146096893-146098968	8:146126585-146128023	Promoter_Associated	-0.70166	-1.7833	-9.91109	2.53513e-17	1.58732e-14	28.8588
cg13559233	chr1	82269258	+	cg13559233	NA	NA	NA	NA	NA	NA	chr1:82265998-82269048	S_Shore	LPHN2	NM_012302	5'UTR	DMR		1:82039500-82041958	1:82267935-82269284	Unclassified	-0.701321	-0.860001	-10.4928	1.00946e-18	1.00245e-15	31.997
cg23246901	chr12	113772827	+	cg23246901	NA	NA	NA	NA	NA	NA	chr12:113772633-113772934	Island	SLC24A6;SLC24A6	NM_024959;NM_024959	1stExon;5'UTR			12:112256747-112257469	12:113771829-113773405	Promoter_Associated	-0.700252	-2.90555	-8.38521	1.06694e-13	2.23867e-11	20.7343
cg17502267	chr15	59981239	-	cg17502267	NA	NA	NA	NA	NA	NA	chr15:59981234-59981795	Island	BNIP2	NM_004330	Body			15:57768192-57769057			-0.699079	-1.1278	-10.7793	2.0581e-19	2.56538e-16	33.5447
cg00569385	chr1	151032336	+	cg00569385	NA	NA	NA	NA	NA	NA	chr1:151031767-151032352	Island	MLLT11;CDC42SE1;MLLT11;CDC42SE1	NM_006818;NM_001038707;NM_006818;NM_020239	5'UTR;TSS1500;1stExon;TSS1500			1:149298418-149298976	1:151031162-151032521	Promoter_Associated	-0.698274	-1.19188	-9.52636	2.11957e-16	9.9481e-14	26.791
cg15534212	chr5	173209194	-	cg15534212	NA	NA	NA	NA	NA	NA		OpenSea				DMR	TRUE		5:173208886-173209372	Unclassified_Cell_type_specific	-0.698189	-2.35191	-11.5238	3.30898e-21	6.61897e-18	37.5626
cg27431596	chr1	120190588	+	cg27431596	NA	NA	NA	NA	NA	NA	chr1:120190377-120191251	Island	ZNF697	NM_001080470	TSS200			1:119991350-119992774			-0.697791	-2.30802	-6.69646	7.05366e-10	4.53334e-08	12.1894
cg00767846	chr2	170655407	-	cg00767846	NA	NA	NA	NA	NA	NA	chr2:170655289-170655757	Island	SSB;SSB	NM_003142;NM_003142	5'UTR;1stExon			2:170363536-170364003	2:170654872-170656465	Promoter_Associated	-0.697143	-2.52819	-10.9599	7.55411e-20	1.09045e-16	34.52
cg03190379	chr12	49690636	-	cg03190379	NA	NA	NA	NA	NA	NA	chr12:49688873-49691360	Island	PRPH	NM_006262	Body		TRUE	12:47976066-47977703	12:49690073-49691259	Unclassified	-0.696227	-0.675015	-6.64016	9.33834e-10	5.7341e-08	11.9176
cg03909902	chr12	108154529	-	cg03909902	NA	NA	NA	NA	NA	NA	chr12:108154394-108155137	Island	PRDM4	NM_012406	5'UTR			12:106678423-106679487			-0.694746	-1.31452	-12.0778	1.54446e-22	4.26824e-19	40.5412
cg06245776	chr6	31461748	+	cg06245776	rs2395041	0.340173	NA	NA	NA	NA	chr6:31461686-31462153	Island						6:31569697-31570226	6:31461021-31462245	Promoter_Associated	-0.694746	-2.46537	-3.39964	0.000913816	0.00447657	-1.25036
cg04721582	chr2	178257292	-	cg04721582	rs143997248	0.0124	NA	NA	NA	NA	chr2:178257227-178257892	Island	LOC100130691;AGPS	NR_026966;NM_003659	Body;TSS200			2:177965498-177966096	2:178256780-178258565	Promoter_Associated	-0.69431	-2.18905	-9.90348	2.64422e-17	1.64798e-14	28.8178
cg18136681	chr1	24969531	-	cg18136681	NA	NA	NA	NA	NA	NA	chr1:24969027-24970196	Island	SRRM1	NM_005839	TSS200			1:24841615-24843311	1:24968935-24970394	Promoter_Associated	-0.694008	-2.1762	-7.43977	1.59356e-11	1.74823e-09	15.8665
cg09047471	chr8	56792345	+	cg09047471	NA	NA	NA	NA	NA	NA	chr8:56792115-56793325	Island	LYN;LYN	NM_002350;NM_001111097	TSS200;TSS200			8:56954521-56956002	8:56792137-56793171	Unclassified	-0.693148	-1.92376	-9.0358	3.12801e-15	1.03751e-12	24.17
cg11490986	chr7	143599184	-	cg11490986	NA	NA	NA	NA	NA	NA	chr7:143598867-143599426	Island	FAM115A	NM_014719	TSS200			7:143229522-143230359	7:143598267-143599593	Promoter_Associated	-0.692065	-1.86771	-7.79029	2.54237e-12	3.52811e-10	17.6501
cg21099776	chr17	17739742	-	cg21099776	NA	NA	NA	NA	NA	NA	chr17:17739511-17740525	Island	SREBF1;SREBF1	NM_004176;NM_001005291	Body;Body			17:17680200-17681265	17:17739088-17740723	Promoter_Associated	-0.691553	-1.96781	-10.6322	4.65796e-19	5.14906e-16	32.7498
cg08258788	chr8	109455865	+	cg08258788	NA	NA	NA	NA	NA	NA	chr8:109455600-109456263	Island	TTC35;TTC35	NM_014673;NM_014673	1stExon;5'UTR			8:109524751-109525439	8:109455265-109456478	Promoter_Associated	-0.690324	-1.7474	-9.80443	4.57144e-17	2.6091e-14	28.2847
cg19475689	chr2	28789802	+	cg19475689	NA	NA	NA	NA	NA	NA	chr2:28789559-28789933	Island	PLB1;PLB1	NM_001170585;NM_153021	Body;Body		TRUE	2:28643064-28643437	2:28788899-28790306	Promoter_Associated	-0.689417	-2.71962	-9.44441	3.32773e-16	1.47316e-13	26.3518
cg01629329	chr20	2633258	-	cg01629329	rs4815467	0.159817	NA	NA	NA	NA	chr20:2632678-2633690	Island	NOP56;MIR1292;NOP56;NOP56	NM_006392;NR_031699;NR_027700;NM_006392	1stExon;TSS200;Body;5'UTR			20:2580718-2582097	20:2632226-2634205	Promoter_Associated	-0.689405	-2.44902	-5.92377	3.01569e-08	1.04014e-06	8.55832
cg17426592	chr5	6712363	-	cg17426592	NA	NA	NA	NA	NA	NA	chr5:6712315-6714900	Island						5:6765223-6765710			-0.689331	-1.32562	-9.70474	7.92712e-17	4.23761e-14	27.7487
cg17381632	chr17	8279794	+	cg17381632	NA	NA	NA	NA	NA	NA	chr17:8279753-8280109	Island				RDMR		17:8220479-8220834	17:8279210-8280696	Promoter_Associated	-0.689277	-1.72556	-9.89894	2.71133e-17	1.67927e-14	28.7934
cg12810548	chr4	53579237	+	cg12810548	NA	NA	NA	NA	NA	NA	chr4:53578358-53579238	Island	SNORA26;KIAA0114	NR_003016;NR_024031	TSS200;Body			4:53273065-53273995	4:53577730-53579510	Promoter_Associated	-0.68921	-1.82035	-12.2598	5.65775e-23	1.78693e-19	41.5167
cg07867325	chr3	73159953	-	cg07867325	rs301539	0.495445	NA	NA	NA	NA	chr3:73159857-73160140	Island						3:73242521-73242830	3:73159789-73160177	NonGene_Associated	-0.689093	1.12103	-6.52704	1.63584e-09	9.20753e-08	11.3747
cg19266034	chr7	108210536	-	cg19266034	NA	NA	NA	NA	NA	NA	chr7:108209784-108210906	Island	THAP5;DNAJB9;THAP5;DNAJB9	NM_182529;NM_012328;NM_001130475;NM_012328	TSS1500;1stExon;TSS1500;5'UTR			7:107996965-107998142			-0.688566	-1.99869	-10.9008	1.04848e-19	1.41617e-16	34.201
cg01469421	chr19	57999034	-	cg01469421	NA	NA	NA	NA	NA	NA	chr19:57999025-57999613	Island	ZNF419;ZNF419;ZNF419;ZNF419;ZNF419;ZNF419;ZNF419	NM_001098493;NM_001098496;NM_024691;NM_001098495;NM_001098491;NM_001098492;NM_001098494	TSS200;TSS200;TSS200;TSS200;TSS200;TSS200;TSS200	DMR		19:62690838-62691425	19:57998539-57999425	Promoter_Associated	-0.688268	-1.51429	-14.2977	8.70572e-28	1.1428e-23	52.2581
cg22385477	chr4	186392754	-	cg22385477	NA	NA	NA	NA	NA	NA	chr4:186392574-186393184	Island	CCDC110;CCDC110	NM_152775;NM_001145411	Body;Body			4:186628935-186630178	4:186392451-186392908	Unclassified	-0.687177	-2.64473	-7.09234	9.54821e-11	8.20384e-09	14.1283
cg07562458	chr1	224622430	+	cg07562458	NA	NA	NA	NA	NA	NA	chr1:224622597-224622818	N_Shore	WDR26;WDR26	NM_001115113;NM_025160	TSS1500;TSS1500			1:222687826-222689441	1:224622221-224622690	Promoter_Associated	-0.68712	-0.717105	-12.3987	2.6331e-23	9.61802e-20	42.2595
cg17951138	chr5	92908392	+	cg17951138	NA	NA	NA	NA	NA	NA	chr5:92906239-92908875	Island	FLJ42709;FLJ42709	NR_021490;NR_021491	Body;Body	RDMR		5:92933473-92934164	5:92908386-92908675	Unclassified_Cell_type_specific	-0.686768	-0.321789	-10.7726	2.13624e-19	2.63155e-16	33.5085
cg23922134	chr2	109403538	-	cg23922134	NA	NA	NA	NA	NA	NA	chr2:109402907-109403566	Island	CCDC138	NM_144978	Body			2:108769360-108769998	2:109402746-109404149	Promoter_Associated	-0.686675	0.217613	-6.02242	1.88996e-08	7.06445e-07	9.0092
cg08169020	chr14	69256888	-	cg08169020	NA	NA	NA	NA	NA	NA	chr14:69256676-69257036	Island	ZFP36L1	NM_004926	Body	RDMR		14:68326368-68326767	14:69256886-69257024	Promoter_Associated	-0.685553	1.15786	-6.38541	3.28081e-09	1.64831e-07	10.7013
cg00437311	chr19	37178174	+	cg00437311	NA	NA	NA	NA	NA	NA	chr19:37178104-37178589	Island						19:41869889-41870725	19:37177770-37179043	Promoter_Associated	-0.685506	0.373632	-7.20975	5.23193e-11	4.89912e-09	14.7121
cg23606385	chr7	100136742	-	cg23606385	NA	NA	NA	NA	NA	NA	chr7:100136448-100136919	Island	AGFG2	NM_006076	TSS200			7:99974110-99975408	7:100136110-100137270	Promoter_Associated	-0.685265	-1.09869	-8.32933	1.44084e-13	2.90286e-11	20.442
cg18835582	chr7	155258315	-	cg18835582	rs61364968	0.013254	NA	NA	NA	NA	chr7:155258827-155261403	N_Shore						7:154950998-154951201			-0.684468	-1.95362	-8.66307	2.37897e-14	6.01527e-12	22.1949
cg22355463	chr4	146857475	+	cg22355463	NA	NA	NA	NA	NA	NA	chr4:146857334-146859082	Island	ZNF827	NM_178835	Body			4:147076463-147076926	4:146857310-146857726	Promoter_Associated	-0.683985	-0.927854	-9.48397	2.67667e-16	1.22082e-13	26.5638
cg10373256	chr22	32871209	-	cg10373256	NA	NA	NA	NA	NA	NA	chr22:32870550-32871364	Island	FBXO7;FBXO7	NM_001033024;NM_012179	TSS200;Body			22:31200551-31201439	22:32869285-32871235	Promoter_Associated	-0.683629	-2.7256	-7.99285	8.69959e-13	1.39109e-10	18.6928
cg19016110	chr17	36981717	-	cg19016110	rs73295184	0.028362	NA	NA	NA	NA	chr17:36981373-36981750	Island	CCDC49	NM_017748	TSS200			17:34234705-34235353	17:36981043-36982061	Promoter_Associated	-0.683478	-2.17756	-9.61268	1.31723e-16	6.67451e-14	27.2542
cg03290677	chr10	135122746	-	cg03290677	NA	NA	NA	NA	NA	NA	chr10:135122851-135123109	N_Shore	ZNF511;TUBGCP2	NM_145806;NM_006659	Body;TSS200			10:134971943-134973099	10:135121154-135123070	Promoter_Associated	-0.683076	-1.93023	-6.15437	1.00566e-08	4.19087e-07	9.61844
cg13256891	chr4	100009986	-	cg13256891	NA	NA	NA	NA	NA	NA	chr4:100009736-100010129	Island	ADH5	NM_000671	TSS200			4:100228460-100229152	4:100009159-100010631	Promoter_Associated	-0.682512	-2.60335	-8.36112	1.21454e-13	2.50089e-11	20.6082
cg01988500	chr16	3030808	+	cg01988500	NA	NA	NA	NA	NA	NA	chr16:3029752-3030954	Island	PKMYT1;PKMYT1	NM_182687;NM_004203	TSS1500;TSS1500			16:2969767-2970938	16:3030078-3031067	Promoter_Associated	-0.681644	-1.71364	-9.11993	1.97452e-15	6.91765e-13	24.618
cg01645753	chr15	83316734	+	cg01645753	NA	NA	NA	NA	NA	NA	chr15:83315116-83317541	Island	CPEB1	NM_030594	TSS200	DMR		15:81112212-81114551	15:83315862-83317582	Unclassified	-0.680967	-2.44202	-7.47704	1.31274e-11	1.48036e-09	16.0548
cg22920300	chr3	181441364	-	cg22920300	NA	NA	NA	NA	NA	NA	chr3:181444409-181445000	N_Shelf	SOX2OT	NR_004053	Body	CDMR		3:182924017-182924086			-0.679964	-1.48092	-3.87679	0.000172325	0.0011286	0.302946
cg27454894	chr16	88878596	-	cg27454894	NA	NA	NA	NA	NA	NA	chr16:88877712-88878936	Island	APRT;APRT	NM_001030018;NM_000485	TSS1500;TSS1500			16:87405250-87406429	16:88877300-88879134	Promoter_Associated	-0.67978	-1.878	-10.6044	5.43424e-19	5.8682e-16	32.5998
cg03518179	chr1	156470915	-	cg03518179	NA	NA	NA	NA	NA	NA	chr1:156469617-156471060	Island	MEF2D	NM_005920	TSS1500			1:154736258-154737684	1:156469665-156471662	Promoter_Associated	-0.679766	-2.65748	-8.02591	7.29735e-13	1.19507e-10	18.8638
cg09989681	chr11	1892043	+	cg09989681	NA	NA	NA	NA	NA	NA	chr11:1892037-1892556	Island	LSP1;LSP1;LSP1;LSP1	NM_001013253;NM_001013255;NM_001013254;NM_002339	5'UTR;TSS200;TSS200;Body			11:1848614-1849132	11:1891168-1893018	Unclassified	-0.679358	1.82312	-7.21807	5.01292e-11	4.72564e-09	14.7536
cg09112371	chr6	33240090	-	cg09112371	NA	NA	NA	NA	NA	NA	chr6:33239326-33240099	Island	VPS52;RPS18	NM_022553;NM_022551	TSS1500;Body			6:33347313-33348127			-0.679136	-0.711819	-8.54619	4.47847e-14	1.05215e-11	21.5792
cg14957430	chr2	64995219	-	cg14957430	NA	NA	NA	NA	NA	NA	chr2:64994988-64995561	Island						2:64848493-64849050	2:64993974-64995914	Promoter_Associated	-0.679006	-1.41491	-9.65408	1.04841e-16	5.43031e-14	27.4765
cg06145708	chr11	124824151	-	cg06145708	NA	NA	NA	NA	NA	NA	chr11:124823793-124824329	Island	CCDC15;CCDC15	NM_025004;NM_025004	5'UTR;1stExon	DMR		11:124328948-124329534	11:124823503-124824824	Promoter_Associated	-0.67848	-2.33422	-10.2652	3.56845e-18	2.89938e-15	30.7678
cg04048796	chr4	57301372	-	cg04048796	NA	NA	NA	NA	NA	NA	chr4:57301340-57302670	Island	PAICS;PPAT;PAICS;PAICS	NM_001079524;NM_002703;NM_006452;NM_001079525	TSS1500;Body;TSS1500;TSS1500			4:56995833-56997427	4:57301133-57302856	Promoter_Associated	-0.678466	-2.33153	-10.7598	2.2945e-19	2.81824e-16	33.4389
cg17456994	chr10	6130864	-	cg17456994	NA	NA	NA	NA	NA	NA	chr10:6130786-6131774	Island	RBM17;RBM17	NM_032905;NM_001145547	TSS200;TSS1500			10:6170711-6172012	10:6130253-6131643	Promoter_Associated	-0.678443	-1.76344	-8.41362	9.15639e-14	1.9674e-11	20.8831
cg25857710	chr3	139654740	+	cg25857710	rs9878008	0.22947	NA	NA	NA	NA	chr3:139653430-139655115	Island	CLSTN2	NM_022131	Body	DMR	TRUE	3:141136121-141137805			-0.677541	-1.56503	-9.01397	3.52424e-15	1.14598e-12	24.0539
cg17524637	chr4	10458454	-	cg17524637	NA	NA	NA	NA	NA	NA	chr4:10458129-10459353	Island	ZNF518B	NM_053042	5'UTR	DMR		4:10067138-10068870			-0.677311	-1.69433	-11.5845	2.36299e-21	4.98797e-18	37.89
cg24552015	chr11	1892038	+	cg24552015	NA	NA	NA	NA	NA	NA	chr11:1892037-1892556	Island	LSP1;LSP1;LSP1;LSP1	NM_001013253;NM_001013255;NM_001013254;NM_002339	5'UTR;TSS200;TSS200;Body			11:1848614-1849132	11:1891168-1893018	Unclassified	-0.677244	2.23023	-7.94283	1.13456e-12	1.74446e-10	18.4346
cg20720553	chr15	101792477	+	cg20720553	NA	NA	NA	NA	NA	NA	chr15:101791151-101792714	Island	CHSY1	NM_014918	TSS1500			15:99608675-99610237	15:101792092-101792525	Promoter_Associated	-0.677242	-1.43471	-9.31196	6.89085e-16	2.7673e-13	25.643
cg21708767	chr2	25565514	+	cg21708767	NA	NA	NA	NA	NA	NA	chr2:25565091-25565604	Island	DNMT3A;DNMT3A;DNMT3A	NM_022552;NM_175629;NM_175630	TSS1500;TSS200;TSS200			2:25416436-25419085	2:25564093-25565627	Unclassified	-0.676029	-2.5182	-8.85879	8.21492e-15	2.42672e-12	23.23
cg03729941	chr3	173114761	-	cg03729941	rs3752769	0.420981	NA	NA	NA	NA	chr3:173115404-173115775	N_Shore	NLGN1	NM_014932	TSS1500	DMR					-0.675418	-1.14073	-10.2065	4.93936e-18	3.82108e-15	30.4513
cg26326168	chr12	133405726	-	cg26326168	NA	NA	NA	NA	NA	NA	chr12:133404789-133405985	Island	GOLGA3	NM_005895	TSS1500			12:131914788-131916239	12:133404500-133406284	Promoter_Associated	-0.674243	-2.54098	-9.54233	1.94106e-16	9.26555e-14	26.8767
cg10909163	chr13	41635251	+	cg10909163	NA	NA	NA	NA	NA	NA	chr13:41634172-41636120	Island	WBP4	NM_007187	TSS1500			13:40532883-40534209	13:41634371-41636297	Promoter_Associated	-0.674158	-2.33299	-8.97556	4.34642e-15	1.3707e-12	23.8498
cg09121543	chr17	61774794	+	cg09121543	rs61622091	0.011436	NA	NA	NA	NA	chr17:61776890-61778733	N_Shelf	LIMD2	NM_030576	3'UTR				17:61774755-61775059	Promoter_Associated	-0.674012	0.143117	-8.03489	6.95682e-13	1.14871e-10	18.9103
cg22256027	chr4	4863016	-	cg22256027	NA	NA	NA	NA	NA	NA	chr4:4864456-4864834	N_Shore	MSX1	NM_002448	Body	DMR	TRUE	4:4912023-4914030	4:4861098-4863378	Unclassified	-0.673942	-1.35467	-8.81744	1.0288e-14	2.94389e-12	23.0109
cg08805160	chr11	8704501	-	cg08805160	NA	NA	NA	NA	NA	NA	chr11:8703783-8704616	Island	RPL27A;SNORA3	NM_000990;NR_002580	Body;TSS1500			11:8660401-8661432	11:8703698-8704958	Unclassified	-0.673763	-2.56327	-7.91927	1.28556e-12	1.93902e-10	18.3131
cg13582782	chr10	27793181	-	cg13582782	NA	NA	NA	NA	NA	NA	chr10:27793049-27793764	Island	RAB18	NM_021252	TSS200			10:27833090-27833848	10:27792420-27793766	Promoter_Associated	-0.673385	-1.90146	-9.72162	7.22212e-17	3.91452e-14	27.8394
cg17144760	chr11	27384507	+	cg17144760	NA	NA	NA	NA	NA	NA	chr11:27384359-27384870	Island	CCDC34;CCDC34	NM_030771;NM_080654	1stExon;1stExon			11:27340994-27341633	11:27384109-27385254	Promoter_Associated	-0.673232	-1.70045	-10.9853	6.55891e-20	9.63343e-17	34.6575
cg20476223	chr20	62681003	-	cg20476223	NA	NA	NA	NA	NA	NA	chr20:62681074-62681332	N_Shore	SOX18	NM_018419	TSS200			20:62149869-62151741	20:62679774-62681645	Unclassified_Cell_type_specific	-0.673103	-2.12693	-7.50621	1.12767e-11	1.29993e-09	16.2024
cg06699275	chr11	68518961	-	cg06699275	NA	NA	NA	NA	NA	NA	chr11:68518754-68518968	Island	MTL5;MTL5;MTL5;MTL5	NM_004923;NM_001039656;NM_004923;NM_001039656	1stExon;1stExon;5'UTR;5'UTR			11:68273965-68275722	11:68517487-68519396	Unclassified	-0.672831	-1.59132	-5.68973	8.99467e-08	2.53036e-06	7.50512
cg20151668	chr10	27150052	+	cg20151668	rs1409128	0.437435	NA	NA	NA	NA	chr10:27149166-27150229	Island	ABI1;ABI1;ABI1;ABI1	NM_005470;NM_001012752;NM_001012751;NM_001012750	TSS200;TSS200;TSS200;TSS200			10:27189155-27190235	10:27149424-27150603	Promoter_Associated	-0.672829	-1.57162	-8.10671	4.74475e-13	8.22574e-11	19.2825
cg16471084	chr6	11537861	-	cg16471084	rs6936962	0.146267	NA	NA	NA	NA	chr6:11537537-11538929	Island	TMEM170B	NM_001100829	TSS1500			6:11645524-11646915	6:11537425-11538134	Promoter_Associated	-0.672738	-0.798091	-7.44036	1.58864e-11	1.74375e-09	15.8695
cg08375754	chr19	40724375	+	cg08375754	NA	NA	NA	NA	NA	NA	chr19:40723104-40724389	Island	TTC9B	NM_152479	TSS200	DMR		19:45415669-45416229	19:40723807-40724477	Unclassified_Cell_type_specific	-0.671991	-0.721137	-9.23728	1.03815e-15	3.96086e-13	25.244
cg16629158	chr2	122042988	+	cg16629158	NA	NA	NA	NA	NA	NA	chr2:122042066-122043093	Island	TFCP2L1	NM_014553	TSS1500			2:121758537-121759601	2:122042806-122043013	Unclassified_Cell_type_specific	-0.671649	-1.35618	-10.7355	2.6258e-19	3.14246e-16	33.3077
cg17246714	chr3	55519186	-	cg17246714	rs187314455	0.0101	NA	NA	NA	NA	chr3:55519089-55519623	Island	WNT5A	NM_003392	Body			3:55494034-55494857	3:55518577-55520238	Unclassified	-0.671298	-1.2191	-8.2418	2.30433e-13	4.36415e-11	19.9851
cg17074213	chr1	92351695	+	cg17074213	NA	NA	NA	NA	NA	NA	chr1:92350913-92352085	Island	TGFBR3;TGFBR3	NM_003243;NM_003243	1stExon;5'UTR			1:92123502-92124673	1:92351374-92351810	Promoter_Associated	-0.670756	-0.580196	-8.97794	4.29042e-15	1.3561e-12	23.8624
cg00513467	chr9	21335551	+	cg00513467	NA	NA	NA	NA	NA	NA	chr9:21335125-21335560	Island	KLHL9	NM_018847	TSS200			9:21324957-21325560	9:21334662-21335876	Unclassified	-0.670653	-2.34682	-12.2981	4.58337e-23	1.47495e-19	41.7212
cg03369465	chr6	33291367	+	cg03369465	NA	NA	NA	NA	NA	NA	chr6:33290370-33291087	S_Shore	DAXX;DAXX;DAXX;DAXX	NM_001141970;NR_024517;NM_001350;NM_001141969	TSS1500;TSS1500;TSS1500;TSS1500			6:33398379-33399346	6:33290313-33291433	Promoter_Associated	-0.670364	-2.54331	-6.88531	2.73275e-10	2.02564e-08	13.1084
cg03907612	chr6	41703314	+	cg03907612	NA	NA	NA	NA	NA	NA	chr6:41701881-41703481	Island	TFEB;TFEB	NM_001167827;NM_007162	5'UTR;TSS1500			6:41809860-41811437	6:41703204-41703569	Promoter_Associated	-0.669865	-0.923567	-11.1284	2.96427e-20	4.73454e-17	35.4301
cg07409897	chr20	13619336	+	cg07409897	NA	NA	NA	NA	NA	NA	chr20:13619285-13619770	Island	TASP1	NM_017714	5'UTR			20:13567177-13567795	20:13619084-13620161	Promoter_Associated	-0.669533	-2.42006	-8.26401	2.04575e-13	3.94195e-11	20.1009
cg25732426	chr21	46294058	+	cg25732426	NA	NA	NA	NA	NA	NA	chr21:46292709-46294744	Island	PTTG1IP	NM_004339	TSS1500			21:45117172-45118785	21:46293496-46294061	Promoter_Associated	-0.668776	-2.64948	-9.57664	1.60676e-16	7.86647e-14	27.0608
cg19223106	chr19	58898630	-	cg19223106	NA	NA	NA	NA	NA	NA	chr19:58897721-58898878	Island	RPS5	NM_001009	TSS200			19:63589555-63590991	19:58897314-58898900	Promoter_Associated	-0.668274	-2.02804	-7.08836	9.74438e-11	8.35629e-09	14.1086
cg03113475	chr19	12833063	+	cg03113475	NA	NA	NA	NA	NA	NA	chr19:12833104-12833574	N_Shore	TNPO2;TNPO2;TNPO2;TNPO2	NM_001136196;NM_013433;NM_001136195;NM_013433	5'UTR;1stExon;5'UTR;5'UTR			19:12693612-12694348	19:12832505-12834056	Promoter_Associated	-0.668257	-1.70977	-9.83929	3.77043e-17	2.22135e-14	28.4723
cg01272058	chr19	40926777	-	cg01272058	NA	NA	NA	NA	NA	NA	chr19:40926640-40927368	Island						19:45618481-45619163	19:40926416-40927842	Promoter_Associated	-0.666934	-2.08076	-9.66131	1.00737e-16	5.25662e-14	27.5154
cg16014422	chr14	23067084	-	cg16014422	rs114422910	0.071204	NA	NA	NA	NA	chr14:23067443-23067773	N_Shore	ABHD4	NM_022060	TSS200			14:22136921-22137600	14:23066347-23068129	Promoter_Associated	-0.666532	-2.26792	-13.2471	2.52961e-25	1.58596e-21	46.7664
cg21292957	chr21	34602922	+	cg21292957	rs12482556	0.385627	NA	NA	NA	NA	chr21:34602241-34603265	Island	IFNAR2;IFNAR2;IFNAR2	NM_207585;NM_207584;NM_000874	5'UTR;5'UTR;5'UTR			21:33523897-33525086	21:34601684-34603680	Promoter_Associated	-0.666411	-2.46021	-9.8358	3.84384e-17	2.25511e-14	28.4535
cg25090499	chr13	26043165	+	cg25090499	rs7317185	0.209936	NA	NA	NA	NA	chr13:26042693-26043486	Island	ATP8A2	NM_016529	Body			13:24940499-24941486			-0.666216	-1.77517	-7.46213	1.41867e-11	1.57988e-09	15.9794
cg18514344	chr10	95242156	-	cg18514344	NA	NA	NA	NA	NA	NA		OpenSea	MYOF;MYOF	NM_133337;NM_013451	TSS200;TSS200			10:95231976-95232161	10:95241886-95242680	Promoter_Associated	-0.66551	-2.75426	-6.98838	1.62141e-10	1.29462e-08	13.6146
cg07223312	chr18	44702757	+	cg07223312	NA	NA	NA	NA	NA	NA	chr18:44702571-44702840	Island	IER3IP1	NM_016097	TSS200			18:42956421-42956803	18:44702074-44703050	Promoter_Associated	-0.665004	-1.10886	-7.83549	2.00268e-12	2.86214e-10	17.8821
cg20957095	chr11	58345705	+	cg20957095	rs59856964	0.011894	NA	NA	NA	NA	chr11:58345673-58347321	Island	ZFP91;LPXN;ZFP91-CNTF	NM_053023;NM_001143995;NR_024091	TSS1500;TSS200;TSS1500			11:58101993-58104095	11:58345383-58345830	Promoter_Associated	-0.664344	-2.18174	-7.3801	2.17187e-11	2.28636e-09	15.5658
cg02928991	chr17	46687865	-	cg02928991	NA	NA	NA	NA	NA	NA	chr17:46687527-46688730	Island	HOXB7	NM_004502	Body			17:44042566-44043182	17:46687679-46687889	Unclassified	-0.664333	-0.282854	-8.38469	1.06996e-13	2.24276e-11	20.7316
cg09070522	chr4	57774717	-	cg09070522	NA	NA	NA	NA	NA	NA	chr4:57773867-57775602	Island	REST	NM_005612	5'UTR			4:57468431-57470468	4:57774558-57775013	Promoter_Associated	-0.664083	-1.68662	-9.4552	3.13592e-16	1.39691e-13	26.4096
cg21115516	chr19	9251333	-	cg21115516	NA	NA	NA	NA	NA	NA	chr19:9251139-9251438	Island	ZNF317	NM_020933	5'UTR			19:9111958-9112583	19:9250699-9251631	NonGene_Associated	-0.663673	-2.22583	-8.55568	4.25449e-14	1.00742e-11	21.6291
cg22508569	chr3	127771381	+	cg22508569	NA	NA	NA	NA	NA	NA	chr3:127770741-127771624	Island	SEC61A1;SEC61A1	NM_013336;NM_013336	5'UTR;1stExon			3:129253396-129254314	3:127770239-127772053	Promoter_Associated	-0.663522	-1.67379	-10.1258	7.72684e-18	5.71438e-15	30.0156
cg01045986	chr18	29671767	-	cg01045986	rs80353901	0.33806	NA	NA	NA	NA	chr18:29671757-29673314	Island	RNF138;RNF138	NM_198128;NM_016271	TSS1500;TSS200			18:27925756-27927363			-0.663007	-1.66539	-8.1182	4.46271e-13	7.78175e-11	19.3421
cg26323130	chr2	149632683	-	cg26323130	NA	NA	NA	NA	NA	NA	chr2:149632682-149633882	Island	KIF5C	NM_004522	TSS200	DMR		2:149349153-149350607	2:149632630-149632887	Unclassified	-0.662609	-1.41846	-8.92631	5.68621e-15	1.74348e-12	23.5882
cg27582527	chr1	15734285	+	cg27582527	rs12562216	0.128484	NA	NA	NA	NA	chr1:15736033-15737228	N_Shore							1:15734177-15734297	Unclassified_Cell_type_specific	-0.662416	1.71325	-6.80914	4.01108e-10	2.80959e-08	12.7364
cg09815927	chr17	655848	+	cg09815927	NA	NA	NA	NA	NA	NA	chr17:655026-656707	Island	ELP2P;GEMIN4	NR_024120;NM_015721	TSS200;TSS1500			17:601553-603457	17:654305-656780	Promoter_Associated	-0.661977	-1.85197	-8.20461	2.81213e-13	5.21075e-11	19.7914
cg06942197	chr17	38804076	+	cg06942197	NA	NA	NA	NA	NA	NA	chr17:38803944-38804703	Island	SMARCE1;SMARCE1	NM_003079;NM_003079	1stExon;5'UTR			17:36057165-36058406	17:38803633-38805503	Promoter_Associated_Cell_type_specific	-0.661555	-0.337361	-9.51157	2.2994e-16	1.06847e-13	26.7117
cg03761846	chr11	93474852	-	cg03761846	rs631116	0.139198	NA	NA	NA	NA	chr11:93474085-93475075	Island	C11orf54;TAF1D;C11orf54	NM_014039;NM_024116;NM_014039	1stExon;TSS200;5'UTR			11:93113950-93114537	11:93473631-93475441	Promoter_Associated	-0.661526	-2.4687	-6.63699	9.48632e-10	5.81437e-08	11.9023
cg25616684	chr1	38478508	+	cg25616684	NA	NA	NA	NA	NA	NA	chr1:38478082-38478727	Island	UTP11L	NM_016037	1stExon			1:38250670-38251282	1:38477967-38478967	Promoter_Associated	-0.661476	-2.4982	-8.78023	1.25953e-14	3.49691e-12	22.8139
cg18721249	chr7	116166456	-	cg18721249	NA	NA	NA	NA	NA	NA	chr7:116164703-116166735	Island	CAV1	NM_001753	Body	DMR		7:115951843-115954094	7:116166102-116167024	Promoter_Associated	-0.660786	-2.71765	-7.94948	1.09526e-12	1.69459e-10	18.4689
cg26503153	chr13	108870610	-	cg26503153	NA	NA	NA	NA	NA	NA	chr13:108870502-108871328	Island	LIG4;ABHD13;LIG4	NM_001098268;NM_032859;NM_001098268	1stExon;TSS200;5'UTR			13:107668450-107669303	13:108870102-108871863	Promoter_Associated	-0.660713	-1.18305	-9.15798	1.60321e-15	5.7708e-13	24.8208
cg12040534	chr17	17942854	-	cg12040534	NA	NA	NA	NA	NA	NA	chr17:17942198-17943495	Island	ATPAF2;C17orf39	NM_145691;NM_024052	TSS1500;1stExon			17:17882843-17884175	17:17942144-17942879	Promoter_Associated	-0.660659	-1.86102	-9.89496	2.77169e-17	1.70967e-14	28.7719
cg07917836	chr17	72869660	+	cg07917836	NA	NA	NA	NA	NA	NA	chr17:72868922-72869703	Island	FDXR;FDXR	NM_024417;NM_004110	TSS1500;TSS1500			17:70380256-70381438	17:72868458-72870310	Promoter_Associated	-0.660518	-1.22951	-9.77975	5.23913e-17	2.95803e-14	28.152
cg23393031	chr19	1249905	-	cg23393031	NA	NA	NA	NA	NA	NA	chr19:1248183-1251179	Island	MIDN	NM_177401	5'UTR			19:1199224-1202179	19:1248764-1249920	Promoter_Associated	-0.660401	-2.05594	-8.92237	5.80978e-15	1.77619e-12	23.5672
cg16855422	chr11	63997982	-	cg16855422	NA	NA	NA	NA	NA	NA	chr11:63997662-63998412	Island	DNAJC4	NM_005528	5'UTR			11:63754001-63755015	11:63997514-63998579	Promoter_Associated	-0.660016	-0.888958	-7.96767	9.94431e-13	1.55984e-10	18.5628
cg26891576	chr17	41277541	+	cg26891576	NA	NA	NA	NA	NA	NA	chr17:41278134-41278460	N_Shore	NBR2;BRCA1;BRCA1;BRCA1;BRCA1;BRCA1;BRCA1	NR_003108;NM_007298;NM_007297;NM_007299;NM_007300;NR_027676;NM_007294	TSS200;TSS1500;TSS200;TSS200;TSS200;TSS1500;TSS200			17:38530585-38531313	17:41277171-41278081	Promoter_Associated	-0.65989	-1.92349	-9.44094	3.39186e-16	1.4935e-13	26.3332
cg01340435	chr15	44487547	-	cg01340435	rs186218970	0.0174	NA	NA	NA	NA	chr15:44486741-44487860	Island	FRMD5	NM_032892	TSS200			15:42274034-42275152	15:44487356-44487926	Unclassified	-0.659427	-2.75569	-7.38007	2.17225e-11	2.28636e-09	15.5656
cg18574725	chr17	34900600	-	cg18574725	NA	NA	NA	NA	NA	NA	chr17:34900150-34901450	Island	GGNBP2	NM_024835	TSS1500			17:31974170-31976140	17:34900557-34900923	Promoter_Associated	-0.65838	-1.91006	-9.83754	3.8071e-17	2.23668e-14	28.4629
cg12771053	chr1	155145617	+	cg12771053	NA	NA	NA	NA	NA	NA	chr1:155145342-155145938	Island	TRIM46;KRTCAP2	NM_025058;NM_173852	TSS1500;Body			1:153411967-153412674	1:155145075-155147223	Promoter_Associated	-0.658071	-1.63791	-11.101	3.45202e-20	5.3906e-17	35.282
cg02837703	chr11	67236413	-	cg02837703	NA	NA	NA	NA	NA	NA	chr11:67236264-67236953	Island	TMEM134;TMEM134;TMEM134	NM_025124;NM_001078651;NM_001078650	Body;Body;Body			11:66992928-66993662	11:67235884-67237213	Promoter_Associated	-0.657983	-1.73444	-9.38051	4.72871e-16	1.98437e-13	26.0097
cg22517316	chr8	42128500	-	cg22517316	NA	NA	NA	NA	NA	NA	chr8:42128689-42129141	N_Shore	IKBKB	NM_001556	TSS1500			8:42247649-42248443	8:42128224-42129879	Promoter_Associated	-0.65753	-2.53497	-9.52805	2.09986e-16	9.89986e-14	26.8001
cg22322834	chr12	50135138	+	cg22322834	NA	NA	NA	NA	NA	NA	chr12:50135029-50136043	Island	TMBIM6;TMBIM6	NM_003217;NM_001098576	TSS200;TSS1500			12:48421279-48422301	12:50134864-50136182	Promoter_Associated	-0.657435	-1.97812	-8.79754	1.14639e-14	3.22761e-12	22.9056
cg03149093	chr19	12035973	+	cg03149093	NA	NA	NA	NA	NA	NA	chr19:12035899-12036433	Island	ZNF700;ZNF700	NM_144566;NM_144566	5'UTR;1stExon			19:11896794-11897433	19:12035245-12036382	Promoter_Associated	-0.656906	-1.65051	-12.0513	1.7877e-22	4.84483e-19	40.3991
cg24605553	chr13	25946972	+	cg24605553	NA	NA	NA	NA	NA	NA	chr13:25945993-25946953	S_Shore	ATP8A2	NM_016529	Body	CDMR	TRUE	13:24843760-24845136	13:25946906-25946981	Unclassified_Cell_type_specific	-0.656746	0.344484	-6.74262	5.59992e-10	3.72144e-08	12.413
cg07403865	chr3	187455953	+	cg07403865	rs11924264	0.000455	NA	NA	NA	NA	chr3:187456250-187456580	N_Shore	BCL6	NM_001706	5'UTR			3:188938315-188938648			-0.656095	-1.5378	-6.17894	8.93554e-09	3.80178e-07	9.73263
cg14607904	chr6	170862125	-	cg14607904	NA	NA	NA	NA	NA	NA	chr6:170862124-170862480	Island	PSMB1;TBP	NM_002793;NM_003194	Body;TSS1500			6:170703953-170704432	6:170862012-170863676	Promoter_Associated	-0.65596	-1.474	-9.38749	4.55076e-16	1.92315e-13	26.047
cg02736602	chr1	197744226	-	cg02736602	NA	NA	NA	NA	NA	NA	chr1:197743931-197744788	Island	DENND1B;DENND1B	NM_001142795;NM_144977	Body;Body			1:196010504-196011381			-0.655608	-1.11894	-9.39763	4.3039e-16	1.83358e-13	26.1013
cg05541258	chr6	27870728	+	cg05541258	rs9468252	0.117907	NA	NA	NA	NA		OpenSea						6:27978674-27978741	6:27870139-27871082	Promoter_Associated	-0.655181	-0.806868	-8.54415	4.52808e-14	1.06025e-11	21.5684
cg18739800	chr6	27806020	+	cg18739800	NA	NA	NA	NA	NA	NA	chr6:27805843-27806853	Island	HIST1H2BN;HIST1H2AK	NM_003520;NM_003510	TSS1500;1stExon			6:27913702-27914092	6:27805976-27806546	Promoter_Associated	-0.654623	-1.32953	-9.09539	2.25824e-15	7.81388e-13	24.4873
cg07626433	chr4	141071632	-	cg07626433	NA	NA	NA	NA	NA	NA	chr4:141071523-141071820	Island	MAML3	NM_018717	Body			4:141290974-141294087			-0.654438	-1.92756	-9.1087	2.09967e-15	7.32556e-13	24.5582
cg07992044	chr11	68096049	+	cg07992044	NA	NA	NA	NA	NA	NA		OpenSea	LRP5	NM_002335	Body		TRUE	11:67852551-67852834	11:68095959-68096232	Unclassified_Cell_type_specific	-0.654165	-2.76614	-7.21146	5.18619e-11	4.86062e-09	14.7206
cg11596580	chr12	3600764	+	cg11596580	NA	NA	NA	NA	NA	NA	chr12:3599966-3603008	Island	PRMT8;PRMT8	NM_019854;NM_019854	1stExon;5'UTR	CDMR		12:3470299-3471250			-0.654156	-0.550889	-9.61112	1.32865e-16	6.70815e-14	27.2458
cg07681156	chr19	56154921	-	cg07681156	NA	NA	NA	NA	NA	NA	chr19:56154791-56155117	Island	ZNF581	NM_016535	TSS200			19:60846529-60847184	19:56154437-56155112	Promoter_Associated	-0.654111	-2.1755	-10.3015	2.91682e-18	2.44561e-15	30.9641
cg13215078	chr11	66188441	+	cg13215078	NA	NA	NA	NA	NA	NA	chr11:66188130-66189397	Island	NPAS4	NM_178864	TSS200			11:65944019-65946033	11:66188381-66188739	Unclassified_Cell_type_specific	-0.653782	-1.3173	-7.12698	7.99869e-11	7.05133e-09	14.3001
cg27113440	chr11	22214386	-	cg27113440	NA	NA	NA	NA	NA	NA	chr11:22214172-22215320	Island	ANO5;ANO5	NM_001142649;NM_213599	TSS1500;TSS1500	DMR		11:22170758-22171984			-0.65377	-0.212649	-9.06034	2.73537e-15	9.20698e-13	24.3006
cg05913197	chr6	166796386	+	cg05913197	rs1546854	0.168997	NA	NA	NA	NA	chr6:166795368-166797301	Island	BRP44L;BRP44L	NM_016098;NM_016098	5'UTR;1stExon			6:166715394-166717258	6:166796374-166796807	Promoter_Associated	-0.653725	-1.0503	-9.14597	1.71215e-15	6.10021e-13	24.7568
cg11817978	chr15	75494295	-	cg11817978	rs143188727	0.0334	NA	NA	NA	NA	chr15:75493982-75495331	Island	C15orf39;C15orf39	NM_015492;NM_015492	1stExon;5'UTR			15:73280983-73282509	15:75494025-75494704	Promoter_Associated	-0.653409	-2.7241	-8.83076	9.56873e-15	2.76633e-12	23.0815
cg20884636	chr2	172290779	-	cg20884636	NA	NA	NA	NA	NA	NA	chr2:172290364-172291201	Island	DCAF17;DCAF17;METTL8;DCAF17;DCAF17;DCAF17	NM_001164821;NM_001164821;NM_024770;NR_028482;NM_025000;NM_025000	5'UTR;1stExon;5'UTR;Body;1stExon;5'UTR			2:171998502-171999542	2:172289803-172291512	Promoter_Associated	-0.653304	-1.88993	-10.3086	2.80413e-18	2.37482e-15	31.0024
cg11567041	chr10	12391824	+	cg11567041	NA	NA	NA	NA	NA	NA	chr10:12390802-12392589	Island	CAMK1D;CAMK1D	NM_153498;NM_020397	1stExon;1stExon			10:12430708-12432640	10:12391512-12391839	Promoter_Associated	-0.653225	-1.79297	-8.92802	5.63335e-15	1.72854e-12	23.5973
cg06045579	chr16	87425660	+	cg06045579	rs113908918	0.0238	NA	NA	NA	NA	chr16:87425137-87426677	Island	FBXO31;MAP1LC3B	NR_024568;NM_022818	Body;TSS200			16:85982669-85984497	16:87425362-87425996	Promoter_Associated	-0.652805	-0.0714219	-7.13118	7.82841e-11	6.92302e-09	14.321
cg13909320	chr9	125026858	-	cg13909320	NA	NA	NA	NA	NA	NA	chr9:125026828-125027250	Island	MRRF;MRRF;RBM18;RBM18;RBM18	NM_199177;NM_138777;NR_027126;NR_027125;NM_033117	TSS1500;TSS1500;Body;Body;5'UTR			9:124066606-124067222	9:125026424-125028006	Unclassified	-0.652727	-1.5426	-7.4929	1.20868e-11	1.38006e-09	16.135
cg12540903	chr19	18263360	+	cg12540903	rs77298622	0.010522	NA	NA	NA	NA	chr19:18263187-18264641	Island	PIK3R2	NM_005027	TSS1500			19:18124191-18125839	19:18263022-18264833	Promoter_Associated	-0.65219	-1.24459	-8.68355	2.12894e-14	5.51691e-12	22.303
cg26011210	chr12	122125276	-	cg26011210	NA	NA	NA	NA	NA	NA	chr12:122124839-122125216	S_Shore							12:122124629-122125329	Promoter_Associated	-0.651531	-0.879256	-11.416	6.01135e-21	1.1478e-17	36.9821
cg26706201	chr11	57103334	+	cg26706201	rs71484443	0.066667	NA	NA	NA	NA	chr11:57102841-57103430	Island	SSRP1;SSRP1	NM_003146;NM_003146	1stExon;5'UTR			11:56859466-56860039	11:57102138-57103954	Promoter_Associated	-0.650805	-1.98689	-8.43944	7.96739e-14	1.74132e-11	21.0185
cg11442381	chr3	52312806	-	cg11442381	NA	NA	NA	NA	NA	NA	chr3:52312069-52313057	Island	WDR82	NM_025222	TSS200			3:52287127-52288079	3:52311367-52313128	Unclassified	-0.650636	-1.1306	-6.65419	8.70839e-10	5.41617e-08	11.9852
cg14450231	chr5	172199425	+	cg14450231	NA	NA	NA	NA	NA	NA	chr5:172197482-172199606	Island	DUSP1	NM_004417	TSS1500			5:172131619-172132274	5:172198628-172199895	Promoter_Associated	-0.65011	-1.6044	-9.71779	7.37642e-17	3.97604e-14	27.8188
cg10477989	chr11	68039601	+	cg10477989	NA	NA	NA	NA	NA	NA	chr11:68039300-68039880	Island	C11orf24	NM_022338	TSS200			11:67795877-67796514	11:68038475-68040133	Promoter_Associated	-0.649605	-1.45329	-10.0548	1.14474e-17	8.03977e-15	29.6329
cg16182055	chr5	137879011	+	cg16182055	NA	NA	NA	NA	NA	NA	chr5:137878264-137879425	Island	ETF1	NM_004730	TSS200			5:137906089-137907377	5:137877818-137880020	Promoter_Associated	-0.649555	-2.64992	-9.11995	1.97434e-15	6.91765e-13	24.6181
cg09010904	chr3	51573036	-	cg09010904	NA	NA	NA	NA	NA	NA	chr3:51572595-51573273	Island						3:51547597-51548295			-0.649536	-1.46467	-11.0992	3.48523e-20	5.42229e-17	35.2726
cg17524151	chr16	475494	-	cg17524151	NA	NA	NA	NA	NA	NA	chr16:474922-476815	Island	RAB11FIP3	NM_014700	TSS200			16:414914-417121	16:475071-476110	Promoter_Associated	-0.649294	-1.61256	-10.0024	1.52976e-17	1.03812e-14	29.3506
cg17079137	chr17	27070735	+	cg17079137	NA	NA	NA	NA	NA	NA	chr17:27070538-27071570	Island	TRAF4	NM_004295	TSS1500			17:24094707-24095808	17:27070637-27071186	Promoter_Associated	-0.648698	-1.43091	-9.89243	2.81083e-17	1.72369e-14	28.7583
cg26132612	chr3	40518669	+	cg26132612	rs187419752	0.0101	NA	NA	NA	NA	chr3:40518517-40518848	Island	ZNF619;ZNF619;ZNF619;ZNF619;ZNF619;ZNF619;ZNF619;ZNF619;ZNF619;ZNF619;ZNF619	NM_001145094;NR_026746;NM_001145083;NM_001145082;NM_001145083;NM_173656;NM_001145093;NM_001145082;NM_001145093;NM_173656;NM_001145094	1stExon;Body;1stExon;5'UTR;5'UTR;1stExon;1stExon;1stExon;5'UTR;5'UTR;5'UTR			3:40493522-40493935	3:40517994-40519639	Promoter_Associated_Cell_type_specific	-0.648465	-1.10649	-8.5294	4.90355e-14	1.13801e-11	21.4909
cg01801101	chr7	2738925	-	cg01801101	rs77129018	0.012163	NA	NA	NA	NA	chr7:2739968-2740417	N_Shore	AMZ1	NM_133463	5'UTR			7:2705381-2705535	7:2738401-2739835	Unclassified	-0.647188	-1.94619	-13.4634	7.8092e-26	5.37765e-22	47.9055
cg26949087	chr2	26467503	-	cg26949087	NA	NA	NA	NA	NA	NA	chr2:26467102-26467946	Island	HADHB;HADHA;HADHA	NM_000183;NM_000182;NM_000182	TSS200;1stExon;5'UTR			2:26320424-26321900	2:26466991-26468040	Promoter_Associated	-0.647165	-1.49738	-8.02943	7.16203e-13	1.1775e-10	18.882
cg00376283	chr12	123451042	-	cg00376283	rs61955196	0.464808	NA	NA	NA	NA	chr12:123450868-123451207	Island	ABCB9;ABCB9;ABCB9;ABCB9;ABCB9	NM_203444;NM_019624;NM_019624;NM_019625;NM_019625	5'UTR;1stExon;5'UTR;5'UTR;1stExon			12:122016575-122017102	12:123450817-123451397	Promoter_Associated	-0.646137	-1.67958	-5.81079	5.12529e-08	1.6013e-06	8.04695
cg21225608	chr4	52709259	-	cg21225608	NA	NA	NA	NA	NA	NA	chr4:52708767-52709538	Island	DCUN1D4;DCUN1D4	NM_015115;NM_001040402	TSS200;TSS200			4:52403112-52404972	4:52708735-52709986	Promoter_Associated	-0.645526	-2.45272	-9.0358	3.12806e-15	1.03751e-12	24.17
cg04571327	chr6	97345972	+	cg04571327	rs12524027	0.034492	NA	NA	NA	NA	chr6:97345266-97345973	Island	NDUFAF4	NM_014165	TSS1500			6:97451988-97452732	6:97345048-97346446	Promoter_Associated	-0.645033	-1.84308	-9.73209	6.81664e-17	3.71391e-14	27.8957
cg26330133	chr20	35089838	+	cg26330133	NA	NA	NA	NA	NA	NA	chr20:35089448-35089998	Island	DLGAP4;DLGAP4;DLGAP4	NM_183006;NM_001042486;NM_014902	TSS1500;TSS200;Body			20:34522486-34523721	20:35088981-35090798	Promoter_Associated	-0.64484	-1.33965	-6.96265	1.84763e-10	1.44989e-08	13.4879
cg04358685	chr3	12598421	-	cg04358685	NA	NA	NA	NA	NA	NA	chr3:12598391-12599051	Island	MKRN2	NM_014160	TSS200			3:12573280-12574002	3:12597906-12599647	Promoter_Associated	-0.644601	-0.0658351	-12.9074	1.61545e-24	7.79991e-21	44.9684
cg17562763	chr11	67398026	-	cg17562763	NA	NA	NA	NA	NA	NA	chr11:67396844-67398294	Island	NUDT8	NM_181843	TSS1500			11:67153074-67155130	11:67395593-67398846	Promoter_Associated	-0.644287	-1.41045	-10.0574	1.12802e-17	7.96373e-15	29.6473
cg20573562	chr11	18034664	-	cg20573562	NA	NA	NA	NA	NA	NA	chr11:18034129-18035268	Island	SERGEF	NM_012139	TSS200			11:17990401-17991844	11:18034395-18035142	Promoter_Associated	-0.64421	-2.72815	-8.32491	1.47544e-13	2.96261e-11	20.4189
cg03238298	chr18	32073112	+	cg03238298	NA	NA	NA	NA	NA	NA	chr18:32073444-32074292	N_Shore	DTNA;DTNA;DTNA	NM_032975;NM_032979;NM_001392	TSS200;TSS200;TSS200						-0.643254	-1.70455	-7.11795	8.37693e-11	7.34777e-09	14.2553
cg00814733	chr12	4382051	-	cg00814733	NA	NA	NA	NA	NA	NA	chr12:4378366-4382222	Island	CCND2	NM_001759	TSS1500		TRUE	12:4251562-4252623			-0.643096	-1.92022	-9.29435	7.59029e-16	3.0051e-13	25.5489
cg27228074	chr10	104678015	-	cg27228074	NA	NA	NA	NA	NA	NA	chr10:104677315-104679312	Island	CNNM2;CNNM2;CNNM2	NM_199076;NM_017649;NM_199077	TSS200;TSS200;TSS200			10:104667306-104669666	10:104677155-104678818	Promoter_Associated	-0.643044	-2.6525	-7.24096	4.45612e-11	4.27462e-09	14.8679
cg00598335	chr8	11627530	-	cg00598335	NA	NA	NA	NA	NA	NA	chr8:11627091-11627668	Island	NEIL2;NEIL2;NEIL2;NEIL2;NEIL2	NM_001135747;NM_001135746;NM_001135748;NM_145043;NM_145043	5'UTR;5'UTR;5'UTR;5'UTR;1stExon			8:11664421-11665384	8:11626759-11628404	Promoter_Associated	-0.642232	-0.218045	-7.4191	1.77416e-11	1.91929e-09	15.7622
cg08715805	chr2	45870883	-	cg08715805	NA	NA	NA	NA	NA	NA	chr2:45870696-45871051	Island						2:45724209-45724555	2:45869700-45871649	Unclassified	-0.641831	-2.4727	-9.44243	3.36409e-16	1.4858e-13	26.3412
cg11723795	chr14	91975931	+	cg11723795	NA	NA	NA	NA	NA	NA	chr14:91975670-91977326	Island	SMEK1	NM_032560	Body			14:91045304-91047079	14:91975923-91977322	Unclassified	-0.641712	-1.94865	-5.14323	1.0509e-06	1.79903e-05	5.14392
cg22721468	chr1	249120642	-	cg22721468	rs115160731	0.012163	NA	NA	NA	NA	chr1:249120450-249120731	Island	SH3BP5L	NM_030645	TSS1500			1:247087074-247087380	1:249119642-249121217	Promoter_Associated	-0.641671	-2.59159	-6.84962	3.27181e-10	2.35943e-08	12.9338
cg22793136	chr12	94543560	+	cg22793136	NA	NA	NA	NA	NA	NA	chr12:94541727-94544000	Island	PLXNC1	NM_005761	1stExon	DMR		12:93065859-93068602	12:94543340-94543629	Promoter_Associated	-0.640449	-1.83679	-10.3241	2.57378e-18	2.21548e-15	31.0859
cg15742519	chr2	190627263	-	cg15742519	NA	NA	NA	NA	NA	NA		OpenSea	OSGEPL1	NM_022353	5'UTR				2:190627019-190628238	Promoter_Associated	-0.640309	-1.48618	-9.82134	4.1637e-17	2.41577e-14	28.3757
cg23274123	chr1	229478617	-	cg23274123	NA	NA	NA	NA	NA	NA	chr1:229478014-229478935	Island	C1orf96	NM_145257	5'UTR			1:227544122-227545751			-0.639968	-0.261638	-6.62153	1.02442e-09	6.21135e-08	11.8279
cg20518154	chr20	39318705	+	cg20518154	NA	NA	NA	NA	NA	NA	chr20:39316550-39319987	Island	MAFB	NM_005461	TSS1500	DMR		20:38749362-38752944	20:39318258-39320111	Unclassified	-0.639475	-1.0962	-11.2789	1.28619e-20	2.22339e-17	36.2423
cg14363494	chr6	33176234	-	cg14363494	rs9469381	0.0403	NA	NA	NA	NA	chr6:33175561-33176387	Island	RING1	NM_002931	TSS200			6:33283570-33284592	6:33175424-33176941	Promoter_Associated	-0.639293	-1.37388	-6.10075	1.30062e-08	5.19238e-07	9.37001
cg23326901	chr5	141737017	+	cg23326901	NA	NA	NA	NA	NA	NA	chr5:141736249-141736980	S_Shore					TRUE	5:141716897-141717305	5:141736031-141737838	Unclassified	-0.639275	-2.6079	-7.99607	8.55178e-13	1.37006e-10	18.7095
cg08050352	chr16	46864715	+	cg08050352	NA	NA	NA	NA	NA	NA	chr16:46864453-46865561	Island	C16orf87	NM_001001436	Body			16:45422003-45423001	16:46864635-46865624	Promoter_Associated	-0.639215	-1.27553	-8.64393	2.63894e-14	6.59444e-12	22.0939
cg07678449	chr4	171011395	+	cg07678449	NA	NA	NA	NA	NA	NA	chr4:171010943-171011503	Island	AADAT;AADAT	NM_016228;NM_182662	TSS1500;TSS200			4:171247212-171248194	4:171010217-171011964	Unclassified	-0.639109	-2.01122	-8.23643	2.37161e-13	4.47341e-11	19.9571
cg20598768	chr1	154193039	-	cg20598768	NA	NA	NA	NA	NA	NA	chr1:154192843-154193852	Island	C1orf43;C1orf43;UBAP2L;UBAP2L;C1orf43;C1orf43;C1orf43;C1orf43	NM_015449;NM_138740;NM_014847;NM_001127320;NM_001098616;NM_001098616;NM_015449;NM_138740	1stExon;1stExon;TSS1500;5'UTR;5'UTR;1stExon;5'UTR;5'UTR			1:152459265-152460606	1:154192514-154194318	Promoter_Associated	-0.638839	-1.11949	-9.46202	3.0204e-16	1.35696e-13	26.4462
cg05622441	chr16	69419962	+	cg05622441	NA	NA	NA	NA	NA	NA	chr16:69419316-69420086	Island	TERF2	NM_005652	TSS200			16:67976839-67977552	16:69418692-69420235	Promoter_Associated	-0.638134	-1.12504	-10.5479	7.43635e-19	7.63752e-16	32.2945
cg10487770	chr5	57879443	-	cg10487770	rs17712820	0.000457	NA	NA	NA	NA	chr5:57878725-57879177	S_Shore	RAB3C	NM_138453	Body	CDMR		5:57915146-57915201			-0.637793	-1.39365	-6.47702	2.09327e-09	1.1324e-07	11.1361
cg18432864	chr11	116969101	+	cg18432864	NA	NA	NA	NA	NA	NA	chr11:116968849-116969512	Island	SIK3	NM_025164	TSS200			11:116473749-116474762			-0.637782	-1.20202	-9.98316	1.70159e-17	1.13818e-14	29.247
cg15400169	chr12	120639619	+	cg15400169	NA	NA	NA	NA	NA	NA	chr12:120638588-120639116	S_Shore	RPLP0;RPLP0	NM_001002;NM_053275	TSS1500;TSS1500						-0.636819	-1.81544	-9.08612	2.37577e-15	8.14011e-13	24.4379
cg13849552	chr18	42260056	-	cg13849552	NA	NA	NA	NA	NA	NA	chr18:42258983-42260795	Island	SETBP1;SETBP1	NM_001130110;NM_015559	TSS200;TSS1500			18:40513972-40514793	18:42259936-42260316	Unclassified_Cell_type_specific	-0.636743	-0.552672	-6.85027	3.26112e-10	2.35293e-08	12.937
cg16259330	chr11	13299070	+	cg16259330	NA	NA	NA	NA	NA	NA	chr11:13298796-13300735	Island	ARNTL;ARNTL;ARNTL	NM_001030272;NM_001178;NM_001030273	TSS1500;TSS1500;TSS1500			11:13255037-13257298	11:13298802-13299478	Promoter_Associated	-0.636742	-2.33393	-8.17526	3.29029e-13	5.99103e-11	19.6386
cg26224915	chr11	14665366	-	cg26224915	NA	NA	NA	NA	NA	NA	chr11:14665053-14666674	Island	PDE3B;PSMA1;PDE3B	NM_000922;NM_148976;NM_000922	1stExon;TSS200;5'UTR			11:14621513-14623227	11:14665162-14665469	Promoter_Associated_Cell_type_specific	-0.636658	-1.89892	-9.03901	3.07368e-15	1.02472e-12	24.1871
cg27473538	chr4	15780522	+	cg27473538	rs6834674	0.239051	NA	NA	NA	NA	chr4:15779998-15780729	Island	CD38	NM_001775	Body	DMR	TRUE	4:15389216-15389827	4:15779632-15781494	Promoter_Associated	-0.636437	-1.54286	-9.66955	9.62618e-17	5.04191e-14	27.5596
cg11437374	chr5	169010780	-	cg11437374	NA	NA	NA	NA	NA	NA	chr5:169010593-169011175	Island	CCDC99;CCDC99	NM_017785;NM_017785	1stExon;5'UTR			5:168943172-168943753	5:169010188-169011128	Promoter_Associated	-0.635576	-1.67508	-8.38281	1.08082e-13	2.25878e-11	20.7217
cg13642545	chr19	45251903	-	cg13642545	NA	NA	NA	NA	NA	NA	chr19:45251975-45252330	N_Shore	BCL3	NM_005178	TSS200			19:49943539-49944143	19:45251674-45251946	Promoter_Associated	-0.635496	-1.41131	-8.40306	9.69222e-14	2.06458e-11	20.8278
cg20382932	chr2	71357258	+	cg20382932	NA	NA	NA	NA	NA	NA	chr2:71357187-71357952	Island	MCEE;MPHOSPH10	NM_032601;NM_005791	Body;TSS200			2:71210385-71211460	2:71356823-71358338	Promoter_Associated	-0.635444	-2.6019	-8.42947	8.40728e-14	1.82135e-11	20.9662
cg14519123	chr15	66544965	+	cg14519123	NA	NA	NA	NA	NA	NA	chr15:66544432-66546134	Island	MEGF11	NM_032445	5'UTR			15:64331306-64332065	15:66544689-66545341	Unclassified	-0.634945	-1.80612	-9.25006	9.67876e-16	3.72317e-13	25.3122
cg00124160	chr7	142490954	-	cg00124160	NA	NA	NA	NA	NA	NA	chr7:142494563-142495248	N_Shelf						7:142190913-142191018	7:142490861-142491452	Promoter_Associated	-0.634796	-2.71969	-7.06526	1.09639e-10	9.2167e-09	13.9942
cg11388258	chr1	151484008	-	cg11388258	rs11584880	0.0417	NA	NA	NA	NA	chr1:151483573-151483902	S_Shore	CGN	NM_020770	5'UTR			1:149749991-149750954			-0.634531	-1.27466	-8.39571	1.00831e-13	2.137e-11	20.7893
cg19654869	chr6	27656290	-	cg19654869	rs10946943	0.152219	NA	NA	NA	NA	chr6:27655343-27655707	S_Shore						6:27763971-27764270	6:27654837-27656294	Promoter_Associated	-0.634435	-1.01621	-8.39108	1.03377e-13	2.18106e-11	20.7651
cg24485820	chr12	117536718	+	cg24485820	NA	NA	NA	NA	NA	NA	chr12:117536290-117537421	Island	TESC;TESC;TESC	NR_031766;NM_017899;NM_001168325	Body;Body;Body			12:116020674-116021788			-0.63435	-1.93737	-8.30964	1.60151e-13	3.18984e-11	20.3391
cg19021985	chr8	22398190	+	cg19021985	NA	NA	NA	NA	NA	NA		OpenSea	PPP3CC	NM_005605	Body		TRUE		8:22397842-22398304	Unclassified_Cell_type_specific	-0.634149	-2.13087	-7.09472	9.43291e-11	8.13139e-09	14.1401
cg24105280	chr12	6797846	+	cg24105280	NA	NA	NA	NA	NA	NA	chr12:6798113-6798922	N_Shore	ZNF384;ZNF384;ZNF384;ZNF384;ZNF384;ZNF384;ZNF384	NM_001039918;NM_001039919;NM_133476;NM_001039916;NM_001135734;NM_001039917;NM_001039920	5'UTR;5'UTR;5'UTR;TSS200;5'UTR;5'UTR;5'UTR				12:6797568-6799144	Unclassified	-0.632927	-1.75147	-8.03431	6.97816e-13	1.15178e-10	18.9073
cg01010870	chr1	21059268	+	cg01010870	NA	NA	NA	NA	NA	NA	chr1:21058006-21059366	Island	SH2D5;SH2D5	NM_001103161;NM_001103160	TSS200;TSS200			1:20930607-20932005			-0.632779	-1.18053	-3.97602	0.000119558	0.000835819	0.646044
cg13402217	chr1	151584375	+	cg13402217	NA	NA	NA	NA	NA	NA	chr1:151584374-151585205	Island	SNX27	NM_030918	TSS1500			1:149850999-149852172	1:151583940-151585757	Promoter_Associated	-0.632541	-0.557928	-8.55575	4.25283e-14	1.00742e-11	21.6295
cg25303761	chr1	31256028	-	cg25303761	NA	NA	NA	NA	NA	NA		OpenSea					TRUE		1:31254883-31256722	Unclassified	-0.631873	-0.284341	-3.14477	0.00209059	0.00885399	-2.0113
cg22282877	chr19	52800469	+	cg22282877	rs67621412	0.268037	NA	NA	NA	NA	chr19:52800399-52800871	Island	ZNF480;ZNF480	NM_144684;NM_144684	5'UTR;1stExon			19:57492012-57492768	19:52799665-52801106	Promoter_Associated	-0.63177	-2.13843	-8.56023	4.15115e-14	9.85725e-12	21.653
cg17217296	chr1	159046937	+	cg17217296	NA	NA	NA	NA	NA	NA		OpenSea	AIM2	NM_004833	TSS1500				1:159046463-159047507	Promoter_Associated	-0.631438	1.34841	-3.17065	0.00192614	0.00827892	-1.93632
cg27524515	chr8	38239417	-	cg27524515	NA	NA	NA	NA	NA	NA	chr8:38239342-38240670	Island	WHSC1L1;WHSC1L1;WHSC1L1;WHSC1L1	NM_023034;NM_023034;NM_017778;NM_017778	1stExon;5'UTR;5'UTR;1stExon			8:38358374-38359986			-0.631203	-1.32173	-7.45695	1.45741e-11	1.61874e-09	15.9532
cg23524709	chr19	4636345	-	cg23524709	NA	NA	NA	NA	NA	NA	chr19:4636207-4636567	Island						19:4587025-4587515	19:4635482-4636978	Unclassified	-0.631084	-1.28781	-7.07696	1.03282e-10	8.76462e-09	14.0521
cg22090640	chr19	45909743	-	cg22090640	NA	NA	NA	NA	NA	NA	chr19:45909062-45910124	Island	CD3EAP;CD3EAP;PPP1R13L;PPP1R13L	NM_012099;NM_012099;NM_001142502;NM_006663	5'UTR;1stExon;TSS200;TSS1500			19:50601417-50602255	19:45909101-45910052	Promoter_Associated	-0.630496	-2.26673	-9.72273	7.17784e-17	3.89554e-14	27.8454
cg22145576	chr8	144897413	+	cg22145576	NA	NA	NA	NA	NA	NA	chr8:144897283-144898354	Island	SCRIB;SCRIB	NM_015356;NM_182706	1stExon;1stExon			8:144969285-144971023			-0.629841	-1.47844	-10.3808	1.87918e-18	1.71604e-15	31.3921
cg13477354	chr1	101705539	+	cg13477354	NA	NA	NA	NA	NA	NA	chr1:101701785-101702068	S_Shelf	S1PR1	NM_001400	Body			1:101477470-101478193	1:101703211-101705552	Promoter_Associated	-0.629809	2.73941	-8.23676	2.36743e-13	4.46753e-11	19.9588
cg09345512	chr10	125852693	-	cg09345512	rs149349730	0.0343	NA	NA	NA	NA	chr10:125851151-125853233	Island				DMR		10:125841171-125843223	10:125852506-125853113	Unclassified_Cell_type_specific	-0.629633	-1.86363	-9.99458	1.59743e-17	1.07708e-14	29.3085
cg23620279	chr10	79793495	-	cg23620279	NA	NA	NA	NA	NA	NA	chr10:79793494-79793952	Island	RPS24;RPS24;RPS24;RPS24;RPS24;RPS24	NM_001142285;NM_001142282;NM_001142284;NM_001026;NM_001142283;NM_033022	TSS200;TSS200;TSS200;TSS200;TSS200;TSS200			10:79463501-79464080	10:79793168-79794406	Promoter_Associated	-0.629243	-1.87983	-9.37861	4.77831e-16	2.00119e-13	25.9995
cg07596482	chr17	42633968	+	cg07596482	NA	NA	NA	NA	NA	NA	chr17:42634829-42636851	N_Shore	FZD2	NM_001466	TSS1500			17:39989396-39989682	17:42633933-42634258	Promoter_Associated	-0.629169	-1.24955	-9.30852	7.02247e-16	2.8121e-13	25.6246
cg15001132	chr13	25875890	-	cg15001132	rs117039588	0.02474	NA	NA	NA	NA	chr13:25874994-25876200	Island	NUPL1;NUPL1;NUPL1;NUPL1	NM_014089;NM_014089;NM_001008564;NM_001008564	5'UTR;1stExon;5'UTR;1stExon			13:24773622-24774336	13:25875018-25876154	Promoter_Associated	-0.629125	-2.48084	-8.02758	7.23254e-13	1.18584e-10	18.8725
cg26008469	chr1	77685062	-	cg26008469	rs12723684	0.178917	NA	NA	NA	NA	chr1:77684996-77685252	Island	PIGK	NM_005482	1stExon			1:77457498-77457826	1:77684640-77685476	Promoter_Associated	-0.628753	-2.48145	-9.98653	1.67022e-17	1.12077e-14	29.2651
cg11564042	chr3	150479915	-	cg11564042	NA	NA	NA	NA	NA	NA	chr3:150479734-150481888	Island	SIAH2	NM_005067	Body			3:151962437-151962651			-0.628742	-1.16334	-9.10879	2.09866e-15	7.32556e-13	24.5586
cg10950050	chr1	62902319	-	cg10950050	NA	NA	NA	NA	NA	NA	chr1:62901651-62903667	Island	USP1;USP1;USP1	NM_001017416;NM_003368;NM_001017415	5'UTR;TSS200;5'UTR			1:62674215-62676023	1:62901893-62902751	Promoter_Associated	-0.628539	-0.865112	-8.01591	7.69573e-13	1.24863e-10	18.8121
cg20871904	chr4	69215305	-	cg20871904	NA	NA	NA	NA	NA	NA	chr4:69215304-69215921	Island	YTHDC1;YTHDC1	NM_001031732;NM_133370	Body;Body			4:68897783-68898516	4:69214844-69216277	Promoter_Associated	-0.628206	-2.08616	-9.54057	1.95998e-16	9.33467e-14	26.8673
cg06757784	chr15	66994613	-	cg06757784	NA	NA	NA	NA	NA	NA	chr15:66993543-66996571	Island	SMAD6;SMAD6	NM_005585;NR_027654	TSS200;TSS200			15:64781276-64782046			-0.628161	-2.19519	-9.32279	6.49329e-16	2.62522e-13	25.7009
cg21523908	chr1	177140609	-	cg21523908	NA	NA	NA	NA	NA	NA	chr1:177140120-177140323	S_Shore	FAM5B	NM_021165	TSS200		TRUE	1:175406751-175407259			-0.627889	-0.445587	-13.1244	4.93807e-25	2.84151e-21	46.1179
cg10198271	chr20	55966838	-	cg10198271	NA	NA	NA	NA	NA	NA	chr20:55966212-55966964	Island	RBM38;RBM38	NM_017495;NM_183425	1stExon;1stExon			20:55399550-55400685			-0.627782	-1.07287	-7.78379	2.6311e-12	3.63683e-10	17.6167
cg06177599	chr1	11898576	-	cg06177599	NA	NA	NA	NA	NA	NA	chr1:11898393-11898732	Island	CLCN6	NM_001286	Body			1:11820992-11821536			-0.627695	1.90236	-9.62252	1.2477e-16	6.36063e-14	27.307
cg16154073	chr3	32433121	-	cg16154073	NA	NA	NA	NA	NA	NA	chr3:32433104-32434162	Island	CMTM7;CMTM7	NM_181472;NM_138410	TSS200;TSS200			3:32408065-32409059	3:32432824-32434688	Promoter_Associated_Cell_type_specific	-0.627621	-1.70885	-8.79864	1.13958e-14	3.21705e-12	22.9114
cg27001534	chr5	443220	-	cg27001534	NA	NA	NA	NA	NA	NA	chr5:442820-443604	Island	C5orf55;C5orf55;EXOC3	NM_138464;NM_138464;NM_007277	5'UTR;1stExon;TSS200			5:495585-496604	5:442455-444365	Promoter_Associated_Cell_type_specific	-0.6272	-0.0799491	-6.51919	1.70046e-09	9.51971e-08	11.3372
cg26228123	chr14	73392919	+	cg26228123	rs28372931	0.188955	NA	NA	NA	NA	chr14:73392696-73393616	Island	DCAF4;DCAF4;DCAF4;DCAF4;DCAF4	NM_181340;NM_001163508;NM_015604;NM_181341;NM_001163509	TSS200;TSS200;TSS200;TSS200;TSS200			14:72462360-72463696	14:73392441-73394031	Promoter_Associated	-0.627157	-1.35114	-6.52131	1.68277e-09	9.43881e-08	11.3473
cg06714758	chr12	57881796	-	cg06714758	NA	NA	NA	NA	NA	NA	chr12:57881750-57882035	Island	MARS	NM_004990	TSS200			12:56167938-56168302	12:57881478-57882138	Promoter_Associated	-0.626602	-1.63059	-9.05184	2.86547e-15	9.58346e-13	24.2554
cg12929040	chr8	56792373	-	cg12929040	NA	NA	NA	NA	NA	NA	chr8:56792115-56793325	Island	LYN;LYN	NM_002350;NM_001111097	TSS200;TSS200			8:56954521-56956002	8:56792137-56793171	Unclassified	-0.626414	-1.487	-9.38536	4.60419e-16	1.94182e-13	26.0357
cg16709874	chr1	211433282	+	cg16709874	NA	NA	NA	NA	NA	NA	chr1:211432105-211434134	Island	RCOR3;RCOR3;RCOR3;RCOR3	NM_001136224;NM_001136225;NM_001136223;NM_018254	Body;Body;Body;TSS200			1:209498606-209499940			-0.626187	-0.11038	-7.01571	1.41114e-10	1.14945e-08	13.7493
cg01112927	chr2	71357293	+	cg01112927	NA	NA	NA	NA	NA	NA	chr2:71357187-71357952	Island	MCEE;MPHOSPH10	NM_032601;NM_005791	Body;TSS200			2:71210385-71211460	2:71356823-71358338	Promoter_Associated	-0.625772	-2.38252	-7.71425	3.79449e-12	4.99977e-10	17.2608
cg26125787	chr4	164415830	-	cg26125787	rs2276978	0.125058	NA	NA	NA	NA	chr4:164415409-164416186	Island	C4orf43;C4orf43	NM_018352;NM_018352	1stExon;5'UTR			4:164634890-164635873	4:164415267-164416669	Promoter_Associated	-0.625725	-2.82919	-6.44453	2.45568e-09	1.29185e-07	10.9815
cg24903006	chr17	38347968	-	cg24903006	NA	NA	NA	NA	NA	NA	chr17:38347533-38347765	S_Shore	RAPGEFL1	NM_016339	Body		TRUE	17:35600985-35601551	17:38346579-38348542	Unclassified	-0.62553	-1.28938	-9.92518	2.34517e-17	1.4861e-14	28.9346
cg07667813	chr19	7985168	+	cg07667813	NA	NA	NA	NA	NA	NA	chr19:7985065-7985390	Island	SNAPC2;SNAPC2	NR_030717;NM_003083	TSS1500;TSS200			19:7890945-7892095	19:7984526-7986332	Promoter_Associated	-0.625428	-1.84822	-8.14568	3.85368e-13	6.8651e-11	19.4848
cg16391678	chr16	30485597	+	cg16391678	NA	NA	NA	NA	NA	NA	chr16:30485382-30485721	Island	ITGAL;ITGAL	NM_002209;NM_001114380	Body;Body			16:30392948-30393312			-0.62536	1.96395	-5.76975	6.20623e-08	1.87407e-06	7.86254
cg03800150	chr7	150216489	-	cg03800150	NA	NA	NA	NA	NA	NA		OpenSea	GIMAP7	NM_153236	5'UTR				7:150216118-150216641	Promoter_Associated_Cell_type_specific	-0.625127	1.84841	-6.84948	3.27415e-10	2.36072e-08	12.9331
cg06391046	chr16	81478765	+	cg06391046	NA	NA	NA	NA	NA	NA	chr16:81478214-81479350	Island	CMIP	NM_198390	TSS200			16:80035331-80036851			-0.624726	-0.288981	-8.9578	4.78884e-15	1.49341e-12	23.7554
cg01900965	chr4	2471727	-	cg01900965	NA	NA	NA	NA	NA	NA	chr4:2470219-2471728	Island	RNF4	NM_002938	5'UTR						-0.624482	-0.906805	-8.02798	7.21736e-13	1.18382e-10	18.8745
cg08770590	chr10	112064742	+	cg08770590	NA	NA	NA	NA	NA	NA	chr10:112064137-112064859	Island	SMNDC1	NM_005871	TSS200			10:112054047-112054877	10:112064094-112065470	Promoter_Associated	-0.624156	-2.6829	-7.22128	4.9309e-11	4.65878e-09	14.7696
cg12832228	chr8	28244096	+	cg12832228	NA	NA	NA	NA	NA	NA	chr8:28243684-28244283	Island	ZNF395	NM_018660	TSS200			8:28298679-28300226	8:28243682-28244123	Promoter_Associated	-0.623903	-1.10289	-8.59043	3.52556e-14	8.51617e-12	21.812
cg00833448	chr2	217236872	+	cg00833448	NA	NA	NA	NA	NA	NA	chr2:217236025-217237129	Island	MARCHF4	NM_020814	TSS200			2:216945117-216945376	2:217236662-217237816	Unclassified_Cell_type_specific	-0.623202	-2.61634	-10.7221	2.82721e-19	3.35483e-16	33.2357
cg06307169	chr17	38296698	+	cg06307169	NA	NA	NA	NA	NA	NA		OpenSea	CASC3;CASC3	NM_007359;NM_007359	5'UTR;1stExon			17:35549908-35550608	17:38295898-38297707	Promoter_Associated	-0.62301	-1.73942	-7.52069	1.04568e-11	1.21981e-09	16.2757
cg22045371	chr2	61244308	+	cg22045371	rs78941345	0.0156	NA	NA	NA	NA		OpenSea	PEX13;PUS10	NM_002618;NM_144709	TSS1500;5'UTR			2:61097492-61098779	2:61243971-61245613	Promoter_Associated	-0.622998	-1.54102	-8.67313	2.25272e-14	5.77357e-12	22.248
cg26214747	chr5	111497064	-	cg26214747	NA	NA	NA	NA	NA	NA	chr5:111496407-111497040	S_Shore	NCRNA00219;SNORA13	NR_015370;NR_002922	Body;TSS200				5:111495336-111497207	Promoter_Associated	-0.622876	-1.71794	-8.93729	5.35581e-15	1.65131e-12	23.6464
cg14335767	chr8	124286570	-	cg14335767	NA	NA	NA	NA	NA	NA	chr8:124286209-124287666	Island	ZHX1;ZHX1	NM_001017926;NM_007222	TSS200;TSS200			8:124355209-124356847	8:124286305-124287475	Promoter_Associated	-0.622148	-2.61166	-8.27249	1.95485e-13	3.78765e-11	20.1451
cg18594562	chr20	57797677	+	cg18594562	NA	NA	NA	NA	NA	NA	chr20:57797223-57797441	S_Shore	ZNF831	NM_178457	Body		TRUE		20:57795803-57798956	Unclassified	-0.621201	-1.50715	-9.53097	2.06643e-16	9.77515e-14	26.8158
cg01949614	chr16	1359397	-	cg01949614	NA	NA	NA	NA	NA	NA	chr16:1358729-1360232	Island	UBE2I;UBE2I;UBE2I;UBE2I;UBE2I	NM_194260;NM_194259;NM_194260;NM_194261;NM_003345	5'UTR;TSS1500;1stExon;5'UTR;TSS1500			16:1298769-1300323	16:1358729-1359906	Promoter_Associated	-0.62101	-1.59953	-8.45144	7.46847e-14	1.64412e-11	21.0814
cg26591930	chr11	70672986	-	cg26591930	NA	NA	NA	NA	NA	NA	chr11:70672834-70673055	Island	SHANK2	NM_012309	Body			11:70350277-70350679			-0.620628	-1.31359	-4.35022	2.85152e-05	0.000258068	1.99839
cg03517226	chr16	89408322	+	cg03517226	NA	NA	NA	NA	NA	NA	chr16:89408237-89408465	Island	ANKRD11	NM_013275	5'UTR			16:87935746-87935921	16:89408025-89408364	Unclassified_Cell_type_specific	-0.620559	2.18539	-7.93605	1.17614e-12	1.79852e-10	18.3996
cg06972182	chr14	56047764	+	cg06972182	rs7141976	0.158135	NA	NA	NA	NA	chr14:56046634-56047986	Island	C14orf33;KTN1;KTN1;KTN1;KTN1	NR_027123;NM_001079521;NM_182926;NM_004986;NM_001079522	TSS1500;5'UTR;5'UTR;5'UTR;5'UTR			14:55116268-55117730			-0.620324	-1.51959	-10.8428	1.44671e-19	1.88146e-16	33.8878
cg15986590	chr19	1862404	-	cg15986590	NA	NA	NA	NA	NA	NA	chr19:1862256-1862600	Island	KLF16	NM_031918	Body			19:1812326-1815984			-0.62025	-2.36057	-9.76306	5.74503e-17	3.1964e-14	28.0622
cg13227691	chr12	72233472	+	cg13227691	NA	NA	NA	NA	NA	NA	chr12:72233323-72233635	Island	TBC1D15;TBC1D15;TBC1D15;TBC1D15	NM_022771;NM_001146214;NR_027449;NM_001146213	TSS200;TSS200;TSS200;TSS200			12:70519507-70520116	12:72233167-72234229	Promoter_Associated	-0.619906	-2.07093	-8.87515	7.51461e-15	2.23681e-12	23.3167
cg21786873	chr4	4250096	-	cg21786873	NA	NA	NA	NA	NA	NA	chr4:4249766-4250270	Island	TMEM128	NM_032927	TSS200	RDMR		4:4300620-4301256	4:4248959-4250715	Promoter_Associated	-0.619419	-1.40718	-10.4152	1.55268e-18	1.45586e-15	31.5779
cg10204695	chr1	111991555	-	cg10204695	NA	NA	NA	NA	NA	NA	chr1:111991304-111992202	Island	WDR77;ATP5F1	NM_024102;NM_001688	Body;TSS200			1:111792770-111793497	1:111991062-111992403	Unclassified	-0.619142	-1.5192	-9.48275	2.69474e-16	1.22507e-13	26.5573
cg04621676	chr1	9599380	+	cg04621676	NA	NA	NA	NA	NA	NA	chr1:9599350-9600444	Island	SLC25A33	NM_032315	TSS200			1:9521843-9523160	1:9598978-9600807	Promoter_Associated	-0.618883	-1.38655	-6.39667	3.10501e-09	1.57562e-07	10.7546
cg08749455	chr11	72492538	-	cg08749455	NA	NA	NA	NA	NA	NA	chr11:72492281-72492644	Island	STARD10	NM_006645	5'UTR			11:72169912-72170674	11:72491904-72493848	Unclassified	-0.618826	-1.22847	-7.57527	7.86378e-12	9.51134e-10	16.5526
cg12222525	chr1	109506178	-	cg12222525	NA	NA	NA	NA	NA	NA	chr1:109505681-109506214	Island	CLCC1;CLCC1	NM_001048210;NM_015127	TSS200;TSS200			1:109307220-109307737	1:109505511-109506410	Promoter_Associated	-0.617799	-2.40437	-7.47104	1.35439e-11	1.51958e-09	16.0244
cg00772714	chr1	15479360	+	cg00772714	rs183962858	0.1163	NA	NA	NA	NA	chr1:15479219-15481471	Island	TMEM51;TMEM51;TMEM51;TMEM51;C1orf126	NM_018022;NM_001136216;NM_001136217;NM_001136218;NR_027136	TSS1500;5'UTR;5'UTR;TSS1500;TSS1500			1:15351548-15354012	1:15477898-15479779	Unclassified	-0.617471	-1.50514	-9.03675	3.11187e-15	1.03416e-12	24.1751
cg23375783	chr17	73008576	+	cg23375783	NA	NA	NA	NA	NA	NA	chr17:73008562-73009170	Island	ICT1	NM_001545	TSS1500			17:70520030-70520876	17:73008097-73009379	Promoter_Associated	-0.616978	-1.65441	-9.33227	6.16388e-16	2.52115e-13	25.7516
cg13435101	chr6	74171350	+	cg13435101	rs12198468	0.090111	NA	NA	NA	NA	chr6:74171349-74171869	Island	MTO1;MTO1;MTO1	NM_133645;NM_001123226;NM_012123	TSS200;TSS200;TSS200			6:74228071-74228744	6:74171253-74172152	Promoter_Associated	-0.616908	-2.13299	-6.28512	5.34774e-09	2.477e-07	10.2288
cg13952954	chr19	59066605	+	cg13952954	NA	NA	NA	NA	NA	NA	chr19:59066151-59066662	Island	CHMP2A;CHMP2A	NM_198426;NM_014453	TSS1500;TSS200			19:63757729-63758418	19:59066141-59066923	Promoter_Associated	-0.616805	-1.83039	-8.1919	3.0101e-13	5.53908e-11	19.7252
cg04000159	chr8	54755598	+	cg04000159	NA	NA	NA	NA	NA	NA	chr8:54755576-54756109	Island	ATP6V1H;ATP6V1H;ATP6V1H;ATP6V1H;ATP6V1H	NM_213619;NM_213619;NM_213620;NM_015941;NM_015941	1stExon;5'UTR;TSS200;1stExon;5'UTR			8:54917711-54918662	8:54754901-54756579	Promoter_Associated	-0.616477	-1.94281	-6.48653	1.99754e-09	1.08846e-07	11.1814
cg10625758	chr17	73851514	-	cg10625758	NA	NA	NA	NA	NA	NA	chr17:73851260-73852222	Island	WBP2	NM_012478	TSS200			17:71362868-71363960	17:73850948-73852656	Promoter_Associated	-0.616057	-1.75791	-10.939	8.48088e-20	1.19134e-16	34.4074
cg18477191	chr8	87526650	+	cg18477191	NA	NA	NA	NA	NA	NA	chr8:87526560-87527272	Island	CPNE3	NM_003909	TSS200			8:87595677-87596374	8:87526286-87527613	Promoter_Associated	-0.615875	-1.4058	-7.87379	1.63561e-12	2.39729e-10	18.0789
cg12872693	chr3	179168798	-	cg12872693	NA	NA	NA	NA	NA	NA	chr3:179168735-179169593	Island	GNB4	NM_021629	5'UTR			3:180651430-180652321	3:179168705-179169855	Promoter_Associated_Cell_type_specific	-0.615453	-1.80497	-9.95744	1.96187e-17	1.27374e-14	29.1084
cg19360788	chr13	39261045	+	cg19360788	rs2496421	0.041133	NA	NA	NA	NA	chr13:39261236-39262299	N_Shore	FREM2	NM_207361	TSS200	DMR		13:38158726-38160421			-0.614969	-1.82021	-8.28974	1.78207e-13	3.49152e-11	20.2352
cg19403653	chr3	158519645	-	cg19403653	NA	NA	NA	NA	NA	NA	chr3:158519509-158520329	Island	MFSD1;MFSD1	NM_022736;NM_001167903	TSS200;TSS200			3:160002137-160003086	3:158519229-158520445	Promoter_Associated	-0.614424	-2.60258	-9.08152	2.43624e-15	8.3337e-13	24.4134
cg27556913	chr4	1341059	-	cg27556913	NA	NA	NA	NA	NA	NA	chr4:1340107-1341471	Island	KIAA1530	NM_020894	TSS200			4:1330029-1331777	4:1340425-1341184	Promoter_Associated	-0.614221	-2.38376	-8.97254	4.41864e-15	1.39035e-12	23.8337
cg10506160	chr16	11762778	-	cg10506160	NA	NA	NA	NA	NA	NA	chr16:11762563-11763246	Island	SNN	NM_003498	5'UTR			16:11669283-11670747	16:11761782-11763561	Promoter_Associated	-0.613592	-1.77169	-8.58304	3.66943e-14	8.83829e-12	21.7731
cg18971241	chr14	76045025	-	cg18971241	rs191422112	0.2294	NA	NA	NA	NA	chr14:76044590-76045102	Island	FLVCR2;FLVCR2	NM_017791;NM_017791	1stExon;5'UTR			14:75113943-75115327	14:76043960-76045663	Promoter_Associated	-0.612999	-2.71323	-8.73336	1.62471e-14	4.36928e-12	22.5661
cg10632328	chr17	78389079	-	cg10632328	NA	NA	NA	NA	NA	NA	chr17:78388437-78389722	Island	FLJ35220;LOC100294362;FLJ35220;FLJ35220	NM_173627;NR_029376;NM_001164637;NM_001164638	Body;TSS200;Body;Body			17:76002631-76004317	17:78388199-78389590	Promoter_Associated	-0.612529	0.479836	-6.14367	1.05871e-08	4.37251e-07	9.56877
cg04975846	chr16	88923880	+	cg04975846	NA	NA	NA	NA	NA	NA	chr16:88922671-88923976	Island	TRAPPC2L;GALNS	NM_016209;NM_000512	Body;TSS1500			16:87450183-87451505	16:88923225-88925446	Promoter_Associated	-0.612469	-0.987678	-8.09098	5.16005e-13	8.81836e-11	19.2009
cg17519479	chr10	1222037	+	cg17519479	rs141553928	0.0288	NA	NA	NA	NA	chr10:1219146-1219427	S_Shelf									-0.612413	2.31511	-7.40237	1.93504e-11	2.06777e-09	15.6779
cg18777999	chr3	115377360	-	cg18777999	NA	NA	NA	NA	NA	NA	chr3:115377267-115377787	Island	GAP43;GAP43	NM_002045;NM_001130064	Body;5'UTR			3:116859985-116860594	3:115376906-115378391	Promoter_Associated_Cell_type_specific	-0.611817	-1.884	-8.25814	2.1112e-13	4.0532e-11	20.0703
cg15667495	chr17	40719620	+	cg15667495	NA	NA	NA	NA	NA	NA	chr17:40718686-40719633	Island	MLX;MLX;MLX	NM_198205;NM_198204;NM_170607	Body;Body;Body				17:40718443-40720042	Promoter_Associated	-0.61172	-1.71172	-10.6531	4.1471e-19	4.65788e-16	32.8629
cg25188239	chr20	48532311	-	cg25188239	rs56327845	0.043403	NA	NA	NA	NA	chr20:48531603-48532316	Island	SPATA2	NM_006038	TSS1500			20:47965011-47966017	20:48531776-48532506	Promoter_Associated	-0.611508	-1.47345	-7.42023	1.76374e-11	1.909e-09	15.7679
cg27212541	chr3	49507385	-	cg27212541	NA	NA	NA	NA	NA	NA	chr3:49507384-49508290	Island	DAG1;DAG1	NM_004393;NM_001165928	TSS200;TSS200			3:49482142-49483294	3:49507098-49508254	Promoter_Associated	-0.611157	-1.56219	-7.88994	1.50163e-12	2.2242e-10	18.162
cg08081407	chr3	57583693	+	cg08081407	NA	NA	NA	NA	NA	NA	chr3:57583020-57583611	S_Shore	ARF4	NM_001660	TSS1500			3:57557278-57558777	3:57582064-57583895	Promoter_Associated	-0.610682	-1.19394	-14.5781	1.95046e-28	3.27728e-24	53.7041
cg16858463	chr3	48130806	-	cg16858463	NA	NA	NA	NA	NA	NA	chr3:48129925-48130896	Island	MAP4;MAP4;MAP4	NM_030885;NM_002375;NM_001134364	TSS200;TSS200;TSS200			3:48104879-48105907	3:48130240-48130940	Promoter_Associated	-0.610672	-0.996403	-8.25303	2.16975e-13	4.14289e-11	20.0437
cg07161888	chr16	53537348	-	cg07161888	NA	NA	NA	NA	NA	NA	chr16:53536501-53537685	Island	AKTIP;AKTIP	NM_022476;NM_001012398	TSS200;TSS200			16:52093919-52095243	16:53536897-53537736	Promoter_Associated	-0.610618	-1.82015	-9.6492	1.07696e-16	5.56449e-14	27.4503
cg02306127	chr19	37157922	-	cg02306127	NA	NA	NA	NA	NA	NA	chr19:37157632-37158119	Island	ZNF461	NM_153257	TSS200	DMR		19:41849473-41849943	19:37157284-37158216	Promoter_Associated	-0.610236	-2.32047	-8.09768	4.97893e-13	8.56457e-11	19.2356
cg19098793	chr7	1609793	-	cg19098793	NA	NA	NA	NA	NA	NA	chr7:1609568-1610037	Island	KIAA1908;KIAA1908;PSMG3;KIAA1908;PSMG3	NR_027329;NR_027328;NM_032302;NR_021487;NM_001134340	Body;Body;TSS200;Body;TSS200			7:1575952-1576767	7:1609291-1610352	Promoter_Associated	-0.610213	-1.87181	-7.69266	4.25043e-12	5.52001e-10	17.1505
cg19752896	chr19	46174395	-	cg19752896	NA	NA	NA	NA	NA	NA	chr19:46174372-46174575	Island	GIPR	NM_000164	Body			19:50865752-50866318	19:46173671-46174504	Unclassified	-0.609015	-1.36293	-8.58751	3.58161e-14	8.64162e-12	21.7967
cg07494646	chr22	37415349	+	cg07494646	rs58029343	0.0746	NA	NA	NA	NA	chr22:37414319-37416111	Island	MPST;TST;MPST;MPST;MPST	NM_001013436;NM_003312;NR_024038;NM_001130517;NM_021126	TSS1500;5'UTR;TSS1500;TSS1500;TSS1500			22:35744266-35746050	22:37415210-37416492	Promoter_Associated	-0.608944	-1.85868	-7.33255	2.77801e-11	2.83859e-09	15.3267
cg24950336	chr3	113464879	+	cg24950336	NA	NA	NA	NA	NA	NA	chr3:113464437-113465159	Island	ATP6V1A;NAA50;NAA50	NM_001690;NM_025146;NM_025146	TSS1500;5'UTR;1stExon			3:114946782-114948040	3:113463775-113464888	Promoter_Associated	-0.608552	-1.05991	-7.4755	1.32331e-11	1.49068e-09	16.047
cg11327809	chr8	101965577	-	cg11327809	NA	NA	NA	NA	NA	NA	chr8:101962644-101965427	S_Shore	YWHAZ;YWHAZ;YWHAZ;YWHAZ	NM_003406;NM_003406;NM_145690;NM_001135699	1stExon;5'UTR;TSS1500;TSS1500			8:102034705-102034802	8:101965290-101965661	Promoter_Associated	-0.608385	-1.32688	-10.9444	8.23021e-20	1.16798e-16	34.4366
cg24748867	chr2	223185320	-	cg24748867	rs6732304	0.201632	NA	NA	NA	NA	chr2:223183013-223185468	Island						2:222891267-222893741			-0.607898	-2.12537	-8.21799	2.61781e-13	4.88732e-11	19.861
cg11728497	chr12	12871887	-	cg11728497	NA	NA	NA	NA	NA	NA	chr12:12869798-12871248	S_Shore	CDKN1B	NM_004064	3'UTR	RDMR		12:12763093-12763210			-0.607807	-1.76422	-8.34425	1.32981e-13	2.70642e-11	20.52
cg07478791	chr1	31886160	-	cg07478791	NA	NA	NA	NA	NA	NA	chr1:31885794-31887010	Island	SERINC2	NM_178865	Body			1:31658382-31659585	1:31885578-31886669	Unclassified_Cell_type_specific	-0.60775	-1.64416	-9.20539	1.23647e-15	4.64577e-13	25.0737
cg02228815	chr15	31685131	+	cg02228815	rs71474659	0.017824	NA	NA	NA	NA	chr15:31683984-31685824	Island						15:29471103-29473083			-0.607472	-1.48399	-11.4025	6.47932e-21	1.22051e-17	36.9092
cg09706180	chr15	50647709	-	cg09706180	NA	NA	NA	NA	NA	NA	chr15:50646437-50647742	Island	GABPB1;GABPB1;FLJ10038;GABPB1;GABPB1;LOC100129387;GABPB1	NM_002041;NM_181427;NR_026891;NM_016654;NM_016655;NR_024490;NM_005254	TSS200;TSS200;TSS1500;TSS200;TSS200;Body;TSS200			15:48434875-48435149	15:50647333-50647725	Promoter_Associated	-0.607028	-1.07887	-7.82572	2.10875e-12	2.98957e-10	17.8319
cg24428042	chr10	11784408	-	cg24428042	NA	NA	NA	NA	NA	NA	chr10:11784407-11784937	Island	ECHDC3;ECHDC3	NM_024693;NM_024693	1stExon;5'UTR			10:11823980-11825312	10:11783840-11785182	Unclassified	-0.60668	-1.5316	-5.59165	1.41222e-07	3.64432e-06	7.07092
cg07001901	chr16	81813363	-	cg07001901	NA	NA	NA	NA	NA	NA	chr16:81812710-81813707	Island	PLCG2	NM_002661	5'UTR		TRUE	16:80370166-80371312			-0.606529	-2.66101	-7.13841	7.54378e-11	6.70234e-09	14.357
cg13999099	chr5	55290899	+	cg13999099	NA	NA	NA	NA	NA	NA	chr5:55290335-55291389	Island	IL6ST;IL6ST	NM_002184;NM_175767	TSS200;TSS200			5:55326051-55327120	5:55289744-55291727	Promoter_Associated	-0.606476	-2.08521	-7.79831	2.43704e-12	3.39202e-10	17.6912
cg07682041	chr5	170763967	-	cg07682041	NA	NA	NA	NA	NA	NA		OpenSea				DMR	TRUE	5:170696546-170696581	5:170762878-170764727	Unclassified	-0.605707	-0.975109	-7.80342	2.37227e-12	3.31726e-10	17.7174
cg16785698	chr4	186456103	+	cg16785698	NA	NA	NA	NA	NA	NA	chr4:186455983-186456864	Island	PDLIM3;PDLIM3	NM_001114107;NM_014476	Body;Body	DMR		4:186692960-186693117			-0.605105	-1.11821	-8.37574	1.12274e-13	2.33361e-11	20.6847
cg13985868	chr9	116102304	+	cg13985868	NA	NA	NA	NA	NA	NA	chr9:116102409-116102717	N_Shore	WDR31;WDR31	NM_001012361;NM_145241	5'UTR;5'UTR				9:116102222-116103177	Promoter_Associated	-0.605054	-1.99769	-8.42863	8.44535e-14	1.82865e-11	20.9618
cg19197830	chr2	170681574	+	cg19197830	NA	NA	NA	NA	NA	NA	chr2:170681219-170681587	Island	METTL5	NM_014168	TSS1500			2:170389466-170389833	2:170680606-170681834	Promoter_Associated	-0.605051	-1.58821	-9.18627	1.37304e-15	5.07271e-13	24.9717
cg16719517	chr21	37442385	+	cg16719517	NA	NA	NA	NA	NA	NA	chr21:37442140-37442778	Island	CBR1;CBR1	NM_001757;NM_001757	1stExon;5'UTR			21:36364066-36364588	21:37441890-37442843	Unclassified	-0.604812	-2.55294	-4.95187	2.40298e-06	3.49554e-05	4.35257
cg13939664	chr10	101989336	-	cg13939664	NA	NA	NA	NA	NA	NA	chr10:101989127-101989533	Island	CHUK;CHUK	NM_001278;NM_001278	5'UTR;1stExon			10:101979118-101979501	10:101988521-101989797	Promoter_Associated	-0.604804	-2.40872	-7.64121	5.56801e-12	6.99229e-10	16.8881
cg15849282	chr3	38537770	-	cg15849282	NA	NA	NA	NA	NA	NA	chr3:38537682-38538071	Island	EXOG;EXOG;EXOG;EXOG	NM_001145464;NM_005107;NM_005107;NM_001145464	5'UTR;1stExon;5'UTR;1stExon			3:38512687-38513274	3:38536970-38538612	Promoter_Associated	-0.604112	-2.1707	-8.45466	7.33976e-14	1.62272e-11	21.0984
cg14793835	chr3	28283034	+	cg14793835	NA	NA	NA	NA	NA	NA	chr3:28282826-28283457	Island	CMC1	NM_182523	TSS200			3:28257850-28258461	3:28282241-28283960	Promoter_Associated	-0.603587	-1.9316	-7.65868	5.08048e-12	6.44704e-10	16.9772
cg14473974	chr9	139439826	-	cg14473974	NA	NA	NA	NA	NA	NA	chr9:139439041-139441532	Island	NOTCH1	NM_017617	Body			9:138558298-138561293	9:139439635-139440052	Promoter_Associated	-0.603223	-1.76499	-8.49681	5.84731e-14	1.32914e-11	21.3196
cg05898482	chr7	152373203	+	cg05898482	rs3218384	0.15633	NA	NA	NA	NA	chr7:152372980-152373421	Island	XRCC2;XRCC2	NM_005431;NM_005431	1stExon;5'UTR			7:152003778-152004354	7:152372072-152373720	Promoter_Associated	-0.602967	-1.20789	-6.36301	3.66012e-09	1.80251e-07	10.5955
cg23098018	chr1	9775755	+	cg23098018	NA	NA	NA	NA	NA	NA	chr1:9775708-9775997	Island	PIK3CD	NM_005026	Body		TRUE	1:9698296-9698721	1:9775529-9776102	Promoter_Associated_Cell_type_specific	-0.602611	1.97921	-7.14581	7.26329e-11	6.48469e-09	14.3937
cg07882382	chr3	12526215	+	cg07882382	NA	NA	NA	NA	NA	NA	chr3:12525749-12526346	Island	TSEN2;TSEN2;TSEN2;TSEN2;TSEN2;TSEN2;TSEN2	NM_001145395;NM_001145392;NM_001145395;NM_025265;NM_001145393;NM_025265;NM_001145394	5'UTR;5'UTR;1stExon;5'UTR;5'UTR;1stExon;5'UTR			3:12500641-12501487	3:12525229-12526485	Promoter_Associated	-0.602605	-2.58054	-8.66802	2.31596e-14	5.89966e-12	22.221
cg04397065	chr17	33469239	+	cg04397065	rs1471615	0.01496	NA	NA	NA	NA	chr17:33468896-33469418	Island	NLE1;NLE1;NLE1	NM_001014445;NM_001014445;NM_018096	5'UTR;1stExon;Body			17:30492808-30493531	17:33468622-33469647	Promoter_Associated	-0.6026	-2.56555	-6.94253	2.04606e-10	1.58195e-08	13.389
cg13284007	chr3	53381865	-	cg13284007	rs28384437	0.010417	NA	NA	NA	NA	chr3:53381345-53381936	Island	DCP1A	NM_018403	TSS1500			3:53356127-53356976	3:53380481-53382228	Promoter_Associated	-0.602274	-1.41662	-10.9858	6.54315e-20	9.63343e-17	34.6598
cg23849311	chr20	24451890	-	cg23849311	NA	NA	NA	NA	NA	NA	chr20:24449844-24452037	Island	TMEM90B	NM_024893	5'UTR	CDMR		20:24397617-24400037			-0.602149	-1.62664	-7.54603	9.1616e-12	1.08744e-09	16.4042
cg18881247	chr2	157189314	+	cg18881247	NA	NA	NA	NA	NA	NA	chr2:157189057-157191437	Island	NR4A2	NM_006186	TSS200			2:156897211-156897653	2:157188907-157189427	Promoter_Associated	-0.602148	-2.39216	-8.39422	1.01644e-13	2.15209e-11	20.7815
cg13089137	chr2	64068705	+	cg13089137	NA	NA	NA	NA	NA	NA	chr2:64067892-64068906	Island	UGP2;UGP2	NM_006759;NM_001001521	TSS1500;5'UTR			2:63921361-63922587	2:64067487-64069136	Promoter_Associated	-0.60143	-2.22178	-8.9202	5.87874e-15	1.79596e-12	23.5557
cg23453437	chr7	148892747	-	cg23453437	NA	NA	NA	NA	NA	NA	chr7:148892424-148892837	Island	ZNF282	NM_003575	1stExon			7:148523385-148524189	7:148892128-148893069	Promoter_Associated	-0.601269	-1.816	-7.78346	2.63557e-12	3.6418e-10	17.6151
cg05224827	chr14	50999389	+	cg05224827	NA	NA	NA	NA	NA	NA	chr14:50998577-50999711	Island	MAP4K5;ATL1;MAP4K5	NM_198794;NM_001127713;NM_006575	TSS200;TSS1500;TSS200			14:50068251-50069461	14:50999210-51000144	Promoter_Associated	-0.601158	-2.23426	-8.65551	2.47846e-14	6.24167e-12	22.155
cg16146432	chr3	167967220	-	cg16146432	rs28395217	0.049864	NA	NA	NA	NA	chr3:167967246-167968130	N_Shore	C3orf50	NR_021485	TSS200			3:169449281-169450798			-0.600453	-1.9738	-10.0813	9.88436e-18	7.08544e-15	29.7759
cg24412469	chr1	200590040	+	cg24412469	NA	NA	NA	NA	NA	NA	chr1:200589552-200590124	Island	KIF14	NM_014875	TSS200			1:198856176-198856766	1:200589415-200590462	Promoter_Associated	-0.600198	-1.5585	-7.80086	2.40457e-12	3.35619e-10	17.7043
cg16727201	chr18	12254556	+	cg16727201	NA	NA	NA	NA	NA	NA	chr18:12254147-12255089	Island	CIDEA;CIDEA	NM_001279;NM_198289	Body;TSS200	DMR	TRUE	18:12243567-12245089			-0.599602	-0.453171	-6.86311	3.05673e-10	2.22804e-08	12.9998
cg00040446	chr1	40367965	+	cg00040446	NA	NA	NA	NA	NA	NA	chr1:40366595-40368213	Island	MYCL1;MYCL1;MYCL1	NM_005376;NM_001033081;NM_001033082	TSS1500;TSS1500;TSS1500			1:40139216-40140800	1:40366596-40368554	Unclassified	-0.599403	-1.6707	-10.4963	9.90105e-19	9.87904e-16	32.0159
cg18554811	chr13	48877691	-	cg18554811	NA	NA	NA	NA	NA	NA	chr13:48877459-48878501	Island	RB1	NM_000321	TSS200			13:47775461-47776491	13:48877111-48879080	Promoter_Associated	-0.599189	-2.3508	-7.56354	8.3611e-12	1.00348e-09	16.493
cg17104026	chr20	43598376	+	cg17104026	NA	NA	NA	NA	NA	NA	chr20:43594894-43595244	S_Shelf	STK4	NM_006282	Body						-0.598378	-2.26431	-10.5252	8.43387e-19	8.5574e-16	32.172
cg22976360	chr2	70528671	-	cg22976360	NA	NA	NA	NA	NA	NA	chr2:70528608-70529337	Island	FAM136A	NM_032822	Body			2:70382046-70382830	2:70528155-70529543	Promoter_Associated	-0.598332	-1.78258	-7.83539	2.00381e-12	2.86214e-10	17.8815
cg17861791	chr1	113162073	+	cg17861791	NA	NA	NA	NA	NA	NA	chr1:113161591-113162571	Island	ST7L;ST7L;CAPZA1;ST7L;ST7L	NM_138727;NM_138728;NM_006135;NM_138729;NM_017744	TSS200;TSS200;TSS200;TSS200;TSS200			1:112962819-112963727	1:113161941-113162080	Promoter_Associated	-0.59827	-1.28839	-10.0847	9.69978e-18	6.965e-15	29.7942
cg04167064	chr1	46932305	-	cg04167064	rs140473607	0.0705	NA	NA	NA	NA	chr1:46932130-46932892	Island					TRUE	1:46704650-46705431	1:46931908-46932918	Unclassified_Cell_type_specific	-0.597903	-1.94146	-9.18357	1.39355e-15	5.13492e-13	24.9573
cg26482052	chr2	66660462	-	cg26482052	NA	NA	NA	NA	NA	NA	chr2:66660452-66660794	Island						2:66513957-66514361	2:66660152-66660901	Unclassified	-0.59776	-0.727787	-6.6659	8.21488e-10	5.15272e-08	12.0417
cg14728310	chr19	9879317	+	cg14728310	rs111302538	0.022395	NA	NA	NA	NA	chr19:9879152-9879736	Island	ZNF846;ZNF846	NM_001077624;NM_001077624	1stExon;5'UTR			19:9739920-9740736	19:9878570-9879975	Promoter_Associated	-0.597517	-1.26158	-8.72221	1.72608e-14	4.60358e-12	22.5072
cg03902565	chr5	43603176	-	cg03902565	NA	NA	NA	NA	NA	NA	chr5:43602977-43603650	Island	NNT;NNT	NM_182977;NM_012343	TSS200;5'UTR			5:43638505-43640082			-0.597337	-2.44684	-7.34773	2.5683e-11	2.64814e-09	15.4029
cg21347644	chr2	149401942	-	cg21347644	rs77705416	0.012598	NA	NA	NA	NA	chr2:149401671-149403498	Island	EPC2	NM_015630	TSS1500			2:149118180-149119554	2:149401773-149402666	Promoter_Associated	-0.596887	0.120917	-7.81441	2.23857e-12	3.15869e-10	17.7738
cg01040523	chr13	37004617	-	cg01040523	NA	NA	NA	NA	NA	NA	chr13:37005581-37006453	N_Shore	CCNA1;CCNA1	NM_001111047;NM_001111046	TSS1500;TSS1500			13:35902589-35903036			-0.596132	-2.1445	-5.79484	5.52135e-08	1.69938e-06	7.97521
cg07972541	chr16	28961971	+	cg07972541	NA	NA	NA	NA	NA	NA	chr16:28961913-28962791	Island	NFATC2IP	NM_032815	TSS1500			16:28869415-28870250	16:28961781-28963165	Promoter_Associated	-0.595974	-2.1393	-9.25799	9.26675e-16	3.58437e-13	25.3546
cg12050434	chr12	43030949	-	cg12050434	NA	NA	NA	NA	NA	NA		OpenSea						12:41317182-41317322			-0.595861	0.290775	-9.2739	8.49177e-16	3.33061e-13	25.4396
cg11754314	chr11	67121010	-	cg11754314	NA	NA	NA	NA	NA	NA	chr11:67120856-67121228	Island	POLD4;LOC100130987;POLD4	NM_021173;NR_024469;NM_021173	1stExon;Body;5'UTR			11:66877356-66877822	11:67120301-67122651	Promoter_Associated	-0.595445	-1.31375	-8.42455	8.63289e-14	1.86541e-11	20.9404
cg15917704	chr5	156569687	+	cg15917704	NA	NA	NA	NA	NA	NA	chr5:156569576-156570067	Island	MED7;MED7;MED7	NM_001100816;NM_001100816;NM_004270	1stExon;5'UTR;5'UTR			5:156502107-156502576	5:156569537-156570457	Promoter_Associated	-0.594743	-2.1436	-8.24956	2.21048e-13	4.21299e-11	20.0256
cg04481722	chr22	18893717	-	cg04481722	rs114972953	0.013032	NA	NA	NA	NA	chr22:18893251-18894291	Island	DGCR6	NM_005675	TSS200			22:17273141-17274417	22:18893210-18894551	Promoter_Associated	-0.594713	-1.54088	-6.51742	1.71535e-09	9.58955e-08	11.3288
cg27053636	chr16	58163123	+	cg27053636	NA	NA	NA	NA	NA	NA	chr16:58162754-58163682	Island	C16orf80;C16orf80	NM_013242;NM_013242	1stExon;5'UTR			16:56720145-56721201	16:58162614-58163863	Promoter_Associated	-0.594525	-2.2366	-8.40043	9.83044e-14	2.08978e-11	20.814
cg12989128	chr20	42875933	-	cg12989128	NA	NA	NA	NA	NA	NA	chr20:42875764-42876184	Island	GDAP1L1;GDAP1L1	NM_024034;NM_024034	5'UTR;1stExon			20:42309255-42309908			-0.594446	-1.17319	-7.09311	9.51095e-11	8.18487e-09	14.1321
cg00029053	chr2	10830014	-	cg00029053	NA	NA	NA	NA	NA	NA	chr2:10829724-10830241	Island	NOL10;NOL10	NM_024894;NM_024894	1stExon;5'UTR			2:10747098-10747692	2:10829610-10830366	Promoter_Associated_Cell_type_specific	-0.594313	-2.41371	-9.21503	1.17284e-15	4.43048e-13	25.1252
cg03668386	chr17	71189054	+	cg03668386	rs7503166	0.4396	NA	NA	NA	NA	chr17:71188407-71189458	Island	COG1	NM_018714	TSS200			17:68700169-68701251			-0.593978	0.125978	-5.56968	1.56149e-07	3.94907e-06	6.97426
cg19619065	chr5	159849010	-	cg19619065	NA	NA	NA	NA	NA	NA	chr5:159848779-159849113	Island	PTTG1	NM_004219	5'UTR			5:159781309-159781691	5:159848521-159849076	Promoter_Associated_Cell_type_specific	-0.593783	-0.99346	-8.33222	1.41861e-13	2.86081e-11	20.4571
cg10680836	chr6	30029120	-	cg10680836	rs7770557	0.161228	NA	NA	NA	NA	chr6:30028936-30029195	Island	NCRNA00171;ZNRD1;ZNRD1;ZNRD1;ZNRD1	NR_026751;NM_170783;NM_014596;NM_170783;NM_014596	TSS200;1stExon;1stExon;5'UTR;5'UTR			6:30136713-30137470	6:30028228-30029841	Promoter_Associated	-0.593524	-1.36281	-9.18896	1.35293e-15	5.0116e-13	24.9861
cg09844907	chr16	15489619	-	cg09844907	NA	NA	NA	NA	NA	NA	chr16:15489526-15490075	Island	MPV17L;MPV17L;MPV17L;MPV17L	NM_173803;NM_173803;NM_001128423;NM_001128423	1stExon;5'UTR;1stExon;5'UTR			16:15397059-15397565			-0.593515	-0.331039	-10.9385	8.50831e-20	1.19134e-16	34.4043
cg25261059	chr19	44031185	+	cg25261059	NA	NA	NA	NA	NA	NA	chr19:44031127-44031504	Island	ETHE1	NM_014297	Body			19:48722968-48723344	19:44030124-44031735	Promoter_Associated	-0.593402	0.375535	-9.66822	9.69723e-17	5.0728e-14	27.5525
cg08843538	chr2	210288784	-	cg08843538	NA	NA	NA	NA	NA	NA	chr2:210288413-210288798	Island	MAP2;MAP2	NM_001039538;NM_001039538	1stExon;5'UTR			2:209996659-209997496	2:210288080-210289238	Unclassified_Cell_type_specific	-0.59324	-0.822044	-8.7977	1.14539e-14	3.22693e-12	22.9064
cg00628877	chr5	130506676	-	cg00628877	NA	NA	NA	NA	NA	NA	chr5:130506330-130506786	Island	LYRM7;LYRM7	NM_181705;NM_181705	1stExon;5'UTR			5:130534239-130534685	5:130506137-130507314	Promoter_Associated	-0.59287	-1.31007	-8.43753	8.04988e-14	1.75387e-11	21.0085
cg18553762	chr2	234763269	+	cg18553762	NA	NA	NA	NA	NA	NA	chr2:234762496-234763579	Island	HJURP	NM_018410	TSS200			2:234427236-234428303	2:234762805-234763761	Promoter_Associated	-0.592822	-2.21975	-8.62982	2.84857e-14	7.02922e-12	22.0195
cg23802518	chr10	80827482	+	cg23802518	rs7087678	0.126651	NA	NA	NA	NA	chr10:80827070-80830537	Island	ZMIZ1;LOC283050;LOC283050;LOC283050	NM_020338;NR_024431;NR_024429;NR_015429	TSS1500;TSS1500;TSS1500;TSS1500			10:80496693-80498243			-0.592095	-1.8331	-6.69086	7.25343e-10	4.63972e-08	12.1623
cg08930741	chr1	59369549	-	cg08930741	NA	NA	NA	NA	NA	NA	chr1:59369311-59369900	Island						1:59141727-59142488	1:59368709-59370029	Promoter_Associated	-0.591891	-2.71095	-8.38554	1.06508e-13	2.23589e-11	20.736
cg19643390	chr17	48712205	-	cg19643390	NA	NA	NA	NA	NA	NA	chr17:48712050-48712705	Island	ABCC3;ABCC3	NM_001144070;NM_003786	TSS200;TSS200			17:46066901-46067692	17:48712073-48712604	Unclassified_Cell_type_specific	-0.591845	-1.96192	-6.88667	2.71407e-10	2.01475e-08	13.115
cg13929079	chr12	49246153	+	cg13929079	NA	NA	NA	NA	NA	NA	chr12:49245656-49246173	Island	DDX23	NM_004818	TSS200		TRUE	12:47531765-47532481	12:49245793-49247790	Promoter_Associated	-0.591802	-1.01901	-8.74821	1.49885e-14	4.06456e-12	22.6446
cg03870497	chr7	26903972	+	cg03870497	rs137938529	0.024822	NA	NA	NA	NA	chr7:26903869-26904753	Island	SKAP2	NM_003930	Body			7:26870375-26871022	7:26903336-26904838	Promoter_Associated	-0.590586	-1.87286	-7.41579	1.80487e-11	1.946e-09	15.7455
cg09746031	chr17	40336180	-	cg09746031	NA	NA	NA	NA	NA	NA	chr17:40335946-40336609	Island	HCRT	NM_001524	Body		TRUE	17:37589329-37590113	17:40335670-40337301	Promoter_Associated	-0.590411	-2.02261	-9.95084	2.03483e-17	1.313e-14	29.0729
cg04619800	chr15	83654972	-	cg04619800	NA	NA	NA	NA	NA	NA	chr15:83654590-83655245	Island	FAM103A1	NM_031452	TSS200			15:81445595-81446359	15:83654323-83655587	Promoter_Associated	-0.590364	-2.00096	-7.76121	2.96351e-12	4.04439e-10	17.5011
cg26029736	chr2	105760375	-	cg26029736	NA	NA	NA	NA	NA	NA	chr2:105760109-105761018	Island				DMR		2:105126542-105127442			-0.590279	-1.0214	-7.06136	1.11837e-10	9.38263e-09	13.9749
cg09625276	chr4	39529229	-	cg09625276	NA	NA	NA	NA	NA	NA	chr4:39528728-39529723	Island	UGDH	NM_003359	TSS200			4:39204929-39206367	4:39528752-39529460	Promoter_Associated	-0.590149	-2.08078	-7.12755	7.97531e-11	7.03368e-09	14.303
cg07721005	chr5	87564621	+	cg07721005	NA	NA	NA	NA	NA	NA	chr5:87564608-87564881	Island	TMEM161B;TMEM161B	NM_153354;NM_153354	5'UTR;1stExon			5:87600185-87600997	5:87564042-87565427	Promoter_Associated	-0.589673	-1.66605	-8.63299	2.80003e-14	6.93811e-12	22.0363
cg12904880	chr6	30139832	-	cg12904880	NA	NA	NA	NA	NA	NA	chr6:30139718-30140263	Island	TRIM15	NM_033229	Body		TRUE	6:30247613-30248242	6:30137754-30140152	Unclassified	-0.589643	-1.03494	-7.78948	2.55328e-12	3.54208e-10	17.6459
cg17728503	chr2	190526181	+	cg17728503	rs1132360	0.387179	NA	NA	NA	NA	chr2:190526058-190526419	Island	ASNSD1;ASNSD1	NM_019048;NM_019048	5'UTR;1stExon			2:190234285-190234684	2:190525672-190526712	Unclassified	-0.589272	-2.36642	-7.06637	1.09017e-10	9.1717e-09	13.9997
cg26926904	chr4	186317539	+	cg26926904	NA	NA	NA	NA	NA	NA	chr4:186317143-186318255	Island	ANKRD37	NM_181726	TSS1500			4:186554057-186555394	4:186317465-186318111	Promoter_Associated	-0.589109	-1.65272	-9.12152	1.95742e-15	6.86919e-13	24.6265
cg16316472	chr4	77997182	+	cg16316472	NA	NA	NA	NA	NA	NA	chr4:77996421-77997571	Island	CCNI	NM_006835	TSS200			4:78216117-78216644	4:77996995-77997703	Promoter_Associated	-0.588664	-0.863354	-6.19256	8.36798e-09	3.598e-07	9.79603
cg10427864	chr6	33422516	-	cg10427864	NA	NA	NA	NA	NA	NA	chr6:33422046-33422530	Island	ZBTB9;ZBTB9	NM_152735;NM_152735	5'UTR;1stExon	RDMR		6:33529880-33530508	6:33420954-33422707	Promoter_Associated	-0.588566	-2.2052	-7.58396	7.51442e-12	9.14673e-10	16.5968
cg00817100	chr1	229543254	-	cg00817100	NA	NA	NA	NA	NA	NA	chr1:229542943-229543770	Island				DMR		1:227609540-227610506			-0.588201	-0.886148	-8.5445	4.51937e-14	1.0588e-11	21.5703
cg11207300	chr12	95867190	+	cg11207300	NA	NA	NA	NA	NA	NA	chr12:95867584-95868019	N_Shore	METAP2	NM_006838	TSS1500				12:95866790-95868170	Promoter_Associated	-0.588161	-1.94853	-9.43354	3.53268e-16	1.53777e-13	26.2936
cg08664810	chr1	92949973	+	cg08664810	NA	NA	NA	NA	NA	NA	chr1:92945907-92952609	Island	GFI1;GFI1;GFI1	NM_001127216;NM_005263;NM_001127215	5'UTR;5'UTR;TSS1500		TRUE	1:92720000-92724204			-0.588093	-1.53253	-7.25336	4.18036e-11	4.05173e-09	14.9299
cg08935299	chr12	123011730	+	cg08935299	NA	NA	NA	NA	NA	NA	chr12:123011261-123011765	Island	KNTC1;RSRC2;RSRC2;RSRC2	NM_014708;NM_198262;NM_023012;NM_198261	TSS200;TSS200;TSS200;TSS200			12:121577089-121578082	12:123011017-123012421	Promoter_Associated	-0.588045	-1.58172	-7.96662	1.00001e-12	1.56684e-10	18.5574
cg17720231	chr1	159915374	+	cg17720231	NA	NA	NA	NA	NA	NA	chr1:159915368-159915797	Island	IGSF9;IGSF9;IGSF9;IGSF9	NM_020789;NM_001135050;NM_001135050;NM_020789	1stExon;1stExon;5'UTR;5'UTR		TRUE	1:158181993-158182415	1:159914583-159916197	Unclassified	-0.587737	0.844176	-7.97375	9.62861e-13	1.51794e-10	18.5942
cg03205007	chr2	55845736	-	cg03205007	NA	NA	NA	NA	NA	NA	chr2:55844267-55845065	S_Shore	SMEK2;SMEK2	NM_001122964;NM_020463	TSS1500;TSS1500			2:55699191-55699241	2:55845606-55846213	Promoter_Associated	-0.587101	-2.0372	-6.67735	7.75933e-10	4.91697e-08	12.097
cg15880762	chr15	49447649	+	cg15880762	NA	NA	NA	NA	NA	NA	chr15:49447339-49447576	S_Shore	GALK2;COPS2;COPS2	NM_001001556;NM_001143887;NM_004236	TSS1500;Body;Body			15:47234532-47235471	15:49447217-49448672	Promoter_Associated	-0.587097	-1.47053	-7.80655	2.33343e-12	3.27494e-10	17.7335
cg23326607	chr11	330945	-	cg23326607	NA	NA	NA	NA	NA	NA	chr11:330785-331110	Island						11:320830-321190			-0.587066	1.78589	-8.12073	4.40269e-13	7.70267e-11	19.3553
cg08265500	chr8	21999416	+	cg08265500	NA	NA	NA	NA	NA	NA	chr8:21998711-21999544	Island	REEP4;REEP4	NM_025232;NM_025232	1stExon;5'UTR			8:22054689-22055569	8:21999118-21999642	Promoter_Associated	-0.586608	-2.52671	-9.336	6.0389e-16	2.47969e-13	25.7715
cg11857665	chr1	234745902	+	cg11857665	NA	NA	NA	NA	NA	NA	chr1:234744276-234747024	Island	IRF2BP2;IRF2BP2	NM_001077397;NM_182972	TSS1500;TSS1500			1:232810769-232812806	1:234745780-234746165	Promoter_Associated	-0.586473	-1.30478	-6.76163	5.09135e-10	3.43289e-08	12.5052
cg16872847	chr19	39893195	-	cg16872847	NA	NA	NA	NA	NA	NA	chr19:39893181-39893613	Island				RDMR		19:44584913-44585434	19:39893024-39893617	Promoter_Associated	-0.586329	-1.96691	-9.65258	1.05708e-16	5.46849e-14	27.4685
cg10213762	chr6	169284319	+	cg10213762	rs4708529	0.423358	NA	NA	NA	NA	chr6:169284752-169284955	N_Shore						6:169026198-169026272			-0.586052	2.49398	-5.20818	7.90415e-07	1.43523e-05	5.41687
cg26742995	chr17	43339594	-	cg26742995	NA	NA	NA	NA	NA	NA	chr17:43339124-43339832	Island	LOC100133991;LOC100133991;C17orf46	NR_024435;NR_024434;NM_152343	Body;Body;TSS200		TRUE	17:40694908-40695592	17:43338903-43339923	Promoter_Associated	-0.585648	-1.17533	-10.2658	3.55586e-18	2.89475e-15	30.7712
cg05581701	chr16	56666323	+	cg05581701	NA	NA	NA	NA	NA	NA	chr16:56665945-56666641	Island	MT1M	NM_176870	TSS1500			16:55223474-55224142			-0.58534	-0.665659	-9.58182	1.56153e-16	7.70788e-14	27.0886
cg13077517	chr20	2082435	-	cg13077517	NA	NA	NA	NA	NA	NA	chr20:2082284-2084070	Island	STK35	NM_080836	TSS200			20:2030294-2032025	20:2082381-2083674	Promoter_Associated	-0.585209	-1.7024	-8.05083	6.39071e-13	1.06401e-10	18.9928
cg26265468	chr19	20189702	+	cg26265468	NA	NA	NA	NA	NA	NA		OpenSea	ZNF90	NM_007138	Body	DMR			19:20189621-20189736	Promoter_Associated_Cell_type_specific	-0.584701	-1.67127	-6.50248	1.84653e-09	1.0194e-07	11.2575
cg26934362	chr5	1519265	+	cg26934362	NA	NA	NA	NA	NA	NA	chr5:1523025-1524588	N_Shelf	LPCAT1	NM_024830	Body				5:1519260-1519336	Unclassified_Cell_type_specific	-0.584396	1.21488	-6.9357	2.11808e-10	1.62924e-08	13.3554
cg09836344	chr4	1243392	+	cg09836344	rs1680033	0.25457	NA	NA	NA	NA	chr4:1241412-1244111	Island	C4orf42;CTBP1;CTBP1	NM_052861;NM_001328;NM_001012614	TSS1500;TSS1500;TSS1500			4:1231413-1234043	4:1241716-1243451	Promoter_Associated	-0.584182	-1.26579	-5.11797	1.17337e-06	1.96557e-05	5.03835
cg09093783	chr5	158636444	-	cg09093783	NA	NA	NA	NA	NA	NA	chr5:158636218-158636949	Island						5:158567704-158569516	5:158636406-158636776	Promoter_Associated	-0.583543	-2.0759	-8.15356	3.69477e-13	6.62415e-11	19.5258
cg19422652	chr12	53574585	-	cg19422652	NA	NA	NA	NA	NA	NA	chr12:53574025-53575150	Island	ZNF740;CSAD;ZNF740	NM_001004304;NM_015989;NM_001004304	5'UTR;TSS200;1stExon			12:51860236-51861403	12:53573608-53575311	Promoter_Associated	-0.583345	-1.82455	-8.63053	2.83758e-14	7.00743e-12	22.0233
cg19881050	chr20	32700182	+	cg19881050	NA	NA	NA	NA	NA	NA	chr20:32699257-32700281	Island	EIF2S2	NM_003908	TSS200			20:32162919-32164384	20:32699967-32700410	Promoter_Associated	-0.582941	-2.20494	-8.82342	9.95867e-15	2.86134e-12	23.0426
cg15684290	chr8	6263623	-	cg15684290	NA	NA	NA	NA	NA	NA	chr8:6263582-6264293	Island	MCPH1	NM_024596	TSS1500			8:6250771-6251861	8:6263089-6265061	Promoter_Associated	-0.58202	-1.86763	-6.61048	1.08223e-09	6.52421e-08	11.7747
cg02551910	chr10	12110991	+	cg02551910	NA	NA	NA	NA	NA	NA	chr10:12110700-12111303	Island	DHTKD1;DHTKD1	NM_018706;NM_018706	5'UTR;1stExon			10:12150671-12151309	10:12110438-12111741	Promoter_Associated	-0.581927	-1.85833	-10.427	1.45437e-18	1.38219e-15	31.6416
cg20494553	chr4	71554112	-	cg20494553	NA	NA	NA	NA	NA	NA	chr4:71553854-71554473	Island	UTP3	NM_020368	TSS200			4:71772479-71773701	4:71553381-71555007	Promoter_Associated	-0.581639	-1.09967	-10.3174	2.67078e-18	2.28493e-15	31.0499
cg02184673	chr11	123066560	+	cg02184673	NA	NA	NA	NA	NA	NA	chr11:123066517-123066986	Island	ASAM	NM_024769	TSS1500			11:122571223-122572280	11:123066029-123066634	Unclassified_Cell_type_specific	-0.58147	-1.76153	-7.31974	2.96817e-11	3.01238e-09	15.2624
cg10590909	chr10	70286987	+	cg10590909	NA	NA	NA	NA	NA	NA	chr10:70286960-70287396	Island	SLC25A16	NM_152707	Body				10:70286518-70287659	Promoter_Associated	-0.581463	-1.86443	-7.84686	1.88588e-12	2.71113e-10	17.9405
cg07940793	chr17	79603854	+	cg07940793	NA	NA	NA	NA	NA	NA	chr17:79603627-79603886	Island	NPLOC4	NM_017921	Body			17:77214101-77214711	17:79603472-79604468	Promoter_Associated	-0.581455	-1.78324	-8.95687	4.81329e-15	1.49992e-12	23.7504
cg27230038	chr2	31456804	-	cg27230038	NA	NA	NA	NA	NA	NA	chr2:31456740-31457653	Island	EHD3	NM_014600	TSS200	DMR		2:31310293-31311121	2:31456238-31457775	Promoter_Associated	-0.581321	-1.62555	-7.90809	1.36396e-12	2.04042e-10	18.2555
cg21104965	chr6	117869453	+	cg21104965	rs210621	0.000276	NA	NA	NA	NA	chr6:117869097-117869530	Island	DCBLD1	NM_173674	Body		TRUE	6:117975518-117976223	6:117868633-117869633	Promoter_Associated	-0.581075	1.53727	-7.66076	5.02531e-12	6.39295e-10	16.9878
cg02239805	chr7	114562316	+	cg02239805	NA	NA	NA	NA	NA	NA	chr7:114562170-114563193	Island	MDFIC;MDFIC;MDFIC;MDFIC;MDFIC;MDFIC	NM_001166345;NM_001166345;NM_001166346;NM_001166346;NM_199072;NM_199072	5'UTR;1stExon;1stExon;5'UTR;5'UTR;1stExon			7:114349273-114350154	7:114562198-114562676	Promoter_Associated	-0.580912	-1.99093	-7.54988	8.97956e-12	1.06976e-09	16.4237
cg15233062	chr12	54447349	+	cg15233062	NA	NA	NA	NA	NA	NA	chr12:54447744-54448091	N_Shore	HOXC4;HOXC4	NM_014620;NM_153633	5'UTR;TSS1500				12:54446153-54447426	Unclassified	-0.58085	-0.722696	-9.82518	4.07621e-17	2.36828e-14	28.3964
cg09997638	chr19	17530742	+	cg09997638	NA	NA	NA	NA	NA	NA	chr19:17530650-17531535	Island	FAM125A	NM_138401	TSS200			19:17391590-17392535	19:17530286-17531771	Promoter_Associated	-0.580506	-0.918639	-9.58778	1.51109e-16	7.48533e-14	27.1205
cg15820397	chr19	17622945	-	cg15820397	NA	NA	NA	NA	NA	NA	chr19:17622317-17623316	Island	PGLS	NM_012088	Body			19:17483221-17484316	19:17622016-17623901	Promoter_Associated	-0.580348	-1.59077	-10.6126	5.19363e-19	5.65196e-16	32.6439
cg03385846	chr16	77756558	-	cg03385846	NA	NA	NA	NA	NA	NA	chr16:77756416-77756681	Island	NUDT7;NUDT7	NM_001105663;NR_024154	Body;Body			16:76313714-76314346	16:77755999-77757357	Promoter_Associated	-0.579984	-2.22178	-9.00863	3.62844e-15	1.17606e-12	24.0255
cg10368533	chr12	22778127	+	cg10368533	NA	NA	NA	NA	NA	NA	chr12:22777988-22778301	Island	ETNK1;ETNK1	NM_001039481;NM_018638	1stExon;1stExon			12:22668899-22670297	12:22777860-22778179	Promoter_Associated	-0.579727	-2.45575	-7.84435	1.91112e-12	2.74459e-10	17.9276
cg02916409	chr16	2510063	-	cg02916409	NA	NA	NA	NA	NA	NA	chr16:2509816-2510482	Island	C16orf59	NM_025108	TSS200			16:2449701-2450565	16:2509185-2510875	Promoter_Associated	-0.579676	-0.0720415	-7.60543	6.71592e-12	8.28035e-10	16.706
cg12550496	chr6	169284344	-	cg12550496	rs4708528	0.330741	NA	NA	NA	NA	chr6:169284752-169284955	N_Shore						6:169026198-169026272			-0.579523	2.46829	-5.23765	6.94121e-07	1.29652e-05	5.54142
cg06240896	chr7	100136768	-	cg06240896	NA	NA	NA	NA	NA	NA	chr7:100136448-100136919	Island	AGFG2	NM_006076	TSS200			7:99974110-99975408	7:100136110-100137270	Promoter_Associated	-0.579511	-1.43697	-7.52791	1.00702e-11	1.17962e-09	16.3123
cg12090413	chr18	47807928	+	cg12090413	rs73434059	0.01234	NA	NA	NA	NA	chr18:47807857-47809365	Island	MBD1;MBD1;MBD1;MBD1;MBD1;MBD1;MBD1;MBD1;MBD1;MBD1	NM_015847;NM_002384;NM_002384;NM_015846;NM_015844;NM_015844;NM_015845;NM_015846;NM_015845;NM_015847	1stExon;1stExon;5'UTR;1stExon;1stExon;5'UTR;5'UTR;5'UTR;1stExon;5'UTR			18:46061592-46062692	18:47807311-47808696	Promoter_Associated	-0.579496	-1.84382	-6.54873	1.46959e-09	8.41267e-08	11.4785
cg23891596	chr19	50169132	+	cg23891596	NA	NA	NA	NA	NA	NA	chr19:50168835-50169342	Island	IRF3;BCL2L12;BCL2L12	NM_001571;NM_001040668;NM_138639	TSS200;1stExon;1stExon			19:54860891-54861216	19:50168747-50169395	Promoter_Associated	-0.57938	-1.74974	-8.70534	1.89164e-14	4.97875e-12	22.418
cg21156815	chr8	22526736	+	cg21156815	NA	NA	NA	NA	NA	NA	chr8:22526298-22526757	Island	BIN3	NM_018688	TSS200			8:22582244-22582702	8:22526063-22527683	Promoter_Associated	-0.579335	-1.45966	-7.27823	3.67756e-11	3.62206e-09	15.0544
cg11760500	chr11	128385880	+	cg11760500	rs11221335	0.134551	NA	NA	NA	NA		OpenSea	ETS1;ETS1;ETS1	NM_001143820;NM_001162422;NM_005238	Body;Body;Body		TRUE				-0.579329	1.72113	-5.90721	3.26055e-08	1.10947e-06	8.48302
cg01962105	chr6	30181212	+	cg01962105	NA	NA	NA	NA	NA	NA	chr6:30180933-30182187	Island	TRIM26	NM_003449	TSS200			6:30288913-30289616	6:30180872-30181439	Promoter_Associated	-0.579288	-1.61699	-8.91724	5.97453e-15	1.82125e-12	23.54
cg27557143	chr19	19754301	+	cg27557143	NA	NA	NA	NA	NA	NA	chr19:19754284-19754507	Island	GMIP	NM_016573	Body				19:19753845-19755891	Promoter_Associated	-0.579033	-2.26788	-7.14914	7.14064e-11	6.39149e-09	14.4103
cg22278056	chr19	44439434	+	cg22278056	NA	NA	NA	NA	NA	NA	chr19:44439200-44439612	Island						19:49130928-49131452	19:44438780-44440262	Unclassified	-0.578915	-1.91244	-8.13482	4.08386e-13	7.21398e-11	19.4284
cg01204305	chr3	49756497	-	cg01204305	NA	NA	NA	NA	NA	NA	chr3:49755763-49757317	Island	AMIGO3;RNF123	NM_198722;NM_022064	1stExon;Body			3:49730543-49732321	3:49756080-49757514	Promoter_Associated	-0.578892	-0.0824028	-11.9792	2.66125e-22	6.94346e-19	40.0125
cg17838705	chr1	112298602	-	cg17838705	rs115027355	0.012288	NA	NA	NA	NA	chr1:112298041-112298992	Island	DDX20;C1orf183	NM_007204;NM_198926	1stExon;TSS200			1:112099322-112100510	1:112297932-112298606	Promoter_Associated	-0.578352	-2.07568	-8.02179	7.45894e-13	1.21584e-10	18.8425
cg09132388	chr7	150217030	-	cg09132388	NA	NA	NA	NA	NA	NA		OpenSea	GIMAP7	NM_153236	5'UTR						-0.578235	2.05129	-5.92291	3.02791e-08	1.04341e-06	8.55442
cg15865771	chr17	12920709	+	cg15865771	NA	NA	NA	NA	NA	NA	chr17:12920956-12921566	N_Shore	ELAC2;ELAC2;ELAC2	NM_018127;NM_001165962;NM_173717	Body;Body;Body				17:12920584-12921896	Promoter_Associated	-0.578174	-1.63171	-7.37893	2.18514e-11	2.29808e-09	15.5598
cg20854551	chr18	61603789	+	cg20854551	rs77708872	0.023458	NA	NA	NA	NA	chr18:61603400-61604244	Island				DMR	TRUE	18:59754384-59755472	18:61603445-61603801	Unclassified	-0.577857	-2.26847	-9.88717	2.89364e-17	1.76417e-14	28.73
cg23051879	chr1	165667556	-	cg23051879	rs4646882	0.185185	NA	NA	NA	NA	chr1:165667544-165667817	Island	ALDH9A1	NM_000696	Body			1:163933992-163934654	1:165667058-165668297	Promoter_Associated	-0.577849	-2.06325	-9.14833	1.6902e-15	6.0366e-13	24.7694
cg26348243	chr6	31540461	-	cg26348243	rs746868	0.345445	NA	NA	NA	NA		OpenSea	LTA;LTA	NM_001159740;NM_000595	5'UTR;5'UTR				6:31539764-31540869	Promoter_Associated	-0.577684	1.06679	-7.41601	1.80287e-11	1.94484e-09	15.7466
cg06007320	chr2	198569882	+	cg06007320	NA	NA	NA	NA	NA	NA	chr2:198569911-198570948	N_Shore	MARS2	NM_138395	TSS1500			2:198278127-198279375	2:198569244-198570871	Promoter_Associated	-0.577573	-2.39391	-7.80063	2.40745e-12	3.35751e-10	17.7031
cg09990790	chr4	73934953	-	cg09990790	NA	NA	NA	NA	NA	NA	chr4:73934944-73935650	Island	COX18	NM_173827	Body			4:74153809-74154556	4:73934289-73936148	Unclassified	-0.577319	-1.96898	-7.51615	1.07075e-11	1.24387e-09	16.2527
cg07050831	chr7	139025240	+	cg07050831	NA	NA	NA	NA	NA	NA	chr7:139024930-139026298	Island	C7orf55	NM_197964	TSS1500			7:138675486-138675933	7:139024441-139026641	NonGene_Associated	-0.577302	-2.50106	-7.8197	2.17688e-12	3.07785e-10	17.801
cg16434372	chr6	166797387	-	cg16434372	NA	NA	NA	NA	NA	NA	chr6:166795368-166797301	S_Shore	BRP44L	NM_016098	TSS1500						-0.577146	-1.66372	-7.57913	7.70658e-12	9.35894e-10	16.5723
cg25444236	chr13	96329629	-	cg25444236	NA	NA	NA	NA	NA	NA	chr13:96328868-96329946	Island	DNAJC3	NM_006260	Body			13:95126558-95128054			-0.577126	-0.732263	-7.20414	5.38486e-11	5.02329e-09	14.6842
cg01585784	chr2	120517537	+	cg01585784	NA	NA	NA	NA	NA	NA	chr2:120517066-120518010	Island	PTPN4;PTPN4	NM_002830;NM_002830	5'UTR;1stExon			2:120233409-120234544	2:120516834-120517938	Promoter_Associated	-0.576932	-1.27445	-5.61766	1.25351e-07	3.31124e-06	7.18563
cg20013855	chr1	178062503	+	cg20013855	NA	NA	NA	NA	NA	NA	chr1:178062712-178063846	N_Shore	LOC100302401;RASAL2	NR_027982;NM_170692	Body;TSS1500						-0.576861	-1.33553	-8.25465	2.15108e-13	4.11098e-11	20.0521
cg06697094	chr17	54911185	+	cg06697094	NA	NA	NA	NA	NA	NA	chr17:54910496-54912470	Island	DGKE	NM_003647	TSS1500			17:52265456-52267519	17:54911166-54911658	Promoter_Associated	-0.576719	-0.0958946	-6.76586	4.9845e-10	3.36946e-08	12.5258
cg23839631	chr13	52703373	+	cg23839631	NA	NA	NA	NA	NA	NA	chr13:52702773-52703387	Island	NEK5	NM_199289	TSS200			13:51600716-51601461	13:52701719-52703540	NonGene_Associated	-0.576539	-1.63504	-8.14483	3.8713e-13	6.89314e-11	19.4804
cg20959189	chr3	141122632	+	cg20959189	NA	NA	NA	NA	NA	NA	chr3:141120983-141121678	S_Shore	ZBTB38	NM_001080412	5'UTR	CDMR			3:141122580-141122745	Unclassified_Cell_type_specific	-0.576129	1.8111	-6.37064	3.52638e-09	1.74826e-07	10.6315
cg11867599	chr4	128887130	+	cg11867599	NA	NA	NA	NA	NA	NA	chr4:128886004-128886971	S_Shore	MFSD8;C4orf29;MFSD8	NM_152778;NM_001039717;NM_152778	5'UTR;5'UTR;1stExon			4:129104038-129106590	4:128885879-128887485	Promoter_Associated	-0.575989	-2.21171	-11.6769	1.41682e-21	3.11599e-18	38.3873
cg25211348	chr1	111769665	-	cg25211348	NA	NA	NA	NA	NA	NA		OpenSea	CHI3L2;CHI3L2	NM_001025197;NM_004000	TSS1500;TSS1500						-0.575413	2.04234	-6.6407	9.31314e-10	5.72114e-08	11.9202
cg04266864	chr17	27224823	+	cg04266864	NA	NA	NA	NA	NA	NA	chr17:27224005-27224873	Island	FLOT2;DHRS13	NM_004475;NM_144683	TSS200;3'UTR			17:24248132-24248992	17:27223549-27225345	Promoter_Associated	-0.575147	-1.68854	-9.21572	1.16838e-15	4.4176e-13	25.1289
cg16082007	chr3	134093380	-	cg16082007	NA	NA	NA	NA	NA	NA	chr3:134092257-134093741	Island	AMOTL2;AMOTL2	NM_016201;NM_016201	1stExon;5'UTR			3:135574855-135576780	3:134092357-134093900	Unclassified_Cell_type_specific	-0.575074	-1.72774	-8.47719	6.50014e-14	1.45625e-11	21.2166
cg13077316	chr21	47845737	-	cg13077316	NA	NA	NA	NA	NA	NA	chr21:47845595-47845864	Island	PCNT	NM_006031	Body			21:46669457-46670310	21:47845617-47845901	Unclassified_Cell_type_specific	-0.574541	1.43025	-6.64969	8.90556e-10	5.52163e-08	11.9635
cg21194911	chr19	44716733	+	cg21194911	NA	NA	NA	NA	NA	NA	chr19:44716461-44716908	Island	ZNF227;ZNF227	NM_182490;NM_182490	5'UTR;1stExon			19:49408389-49408748	19:44716249-44717359	Promoter_Associated	-0.574506	-1.75409	-7.12191	8.20893e-11	7.2185e-09	14.275
cg08905662	chr7	102789948	+	cg08905662	NA	NA	NA	NA	NA	NA	chr7:102789395-102790120	Island	NAPEPLD;NAPEPLD	NM_198990;NM_001122838	TSS1500;TSS1500			7:102576632-102577505	7:102789242-102790222	Promoter_Associated	-0.574501	-1.62725	-7.57608	7.83057e-12	9.47664e-10	16.5567
cg07774478	chr2	127865245	+	cg07774478	NA	NA	NA	NA	NA	NA	chr2:127863642-127865288	Island	BIN1;BIN1;BIN1;BIN1;BIN1;BIN1;BIN1;BIN1;BIN1;BIN1	NM_004305;NM_139344;NM_139347;NM_139351;NM_139345;NM_139343;NM_139348;NM_139349;NM_139350;NM_139346	TSS1500;TSS1500;TSS1500;TSS1500;TSS1500;TSS1500;TSS1500;TSS1500;TSS1500;TSS1500			2:127579838-127581719			-0.574462	-2.62132	-6.18677	8.60488e-09	3.68461e-07	9.76906
cg05270290	chr15	29562120	+	cg05270290	NA	NA	NA	NA	NA	NA	chr15:29561494-29562143	Island	NDNL2;FAM189A1	NM_138704;NM_015307	TSS200;Body			15:27348446-27349435	15:29561844-29562368	Promoter_Associated	-0.574455	-2.27197	-3.66856	0.00036357	0.00209169	-0.394933
cg02897527	chr10	88699338	-	cg02897527	NA	NA	NA	NA	NA	NA	chr10:88702315-88703322	N_Shelf	MMRN2	NM_024756	Body			10:88689318-88689375	10:88698238-88699677	Unclassified	-0.57431	-1.94558	-8.33366	1.4077e-13	2.8429e-11	20.4646
cg13338877	chr6	29974531	-	cg13338877	rs144954431	0.016	NA	NA	NA	NA	chr6:29974220-29975369	Island	HLA-J;NCRNA00171	NR_024240;NR_026751	Body;Body		TRUE	6:30082200-30083348	6:29974282-29975094	Unclassified_Cell_type_specific	-0.574108	-2.1165	-8.64774	2.58501e-14	6.46735e-12	22.114
cg18528640	chr1	155579964	-	cg18528640	NA	NA	NA	NA	NA	NA	chr1:155579732-155580328	Island	MSTO1	NM_018116	TSS200			1:153846252-153847043	1:155579297-155580137	Promoter_Associated	-0.57384	-1.40194	-10.0716	1.04292e-17	7.41276e-15	29.7236
cg19502700	chr4	113558183	+	cg19502700	NA	NA	NA	NA	NA	NA	chr4:113558032-113558681	Island	LARP7;LARP7;LARP7;C4orf21	NM_016648;NM_016648;NM_015454;NM_018392	1stExon;5'UTR;TSS1500;TSS200			4:113777482-113778168	4:113557889-113559105	Unclassified	-0.573677	-0.949503	-7.56494	8.29997e-12	9.97517e-10	16.5002
cg14213021	chr10	71930531	-	cg14213021	NA	NA	NA	NA	NA	NA	chr10:71930007-71930587	Island	SAR1A;SAR1A	NM_020150;NM_001142648	TSS1500;TSS1500			10:71599665-71600546	10:71929783-71930783	Promoter_Associated	-0.573157	-2.02423	-8.54516	4.50337e-14	1.05623e-11	21.5738
cg17392909	chr10	135187035	+	cg17392909	NA	NA	NA	NA	NA	NA	chr10:135186693-135187181	Island	ECHS1	NM_004092	TSS200			10:135036333-135037329	10:135185790-135187563	Promoter_Associated	-0.572703	0.352832	-6.76391	5.03362e-10	3.39888e-08	12.5163
cg11227645	chr1	224544764	-	cg11227645	rs56105022	0.0142	NA	NA	NA	NA	chr1:224544523-224545224	Island	CNIH4	NM_014184	Body			1:222611147-222611896	1:224544239-224546150	Promoter_Associated	-0.572279	-1.32689	-8.99621	3.88314e-15	1.24707e-12	23.9595
cg23183521	chr12	57146030	+	cg23183521	rs2277339	0.15529	NA	NA	NA	NA	chr12:57145948-57146333	Island	PRIM1	NM_000946	1stExon			12:55432081-55432600	12:57144913-57146467	Promoter_Associated	-0.572192	-1.98638	-7.32864	2.83479e-11	2.89097e-09	15.3071
cg07191189	chr2	37193690	+	cg07191189	NA	NA	NA	NA	NA	NA	chr2:37193131-37194287	Island	STRN	NM_003162	TSS200			2:37046458-37047887	2:37193656-37194264	Promoter_Associated	-0.571887	-2.54796	-7.50424	1.13931e-11	1.31191e-09	16.1924
cg14560584	chr22	46692491	-	cg14560584	NA	NA	NA	NA	NA	NA	chr22:46692210-46693349	Island	CN5H6.4;GTSE1	NR_024009;NM_016426	Body;TSS200			22:45070875-45072062	22:46692041-46693282	Promoter_Associated	-0.571826	-1.76566	-8.64899	2.56753e-14	6.44282e-12	22.1206
cg05976652	chr10	63661316	+	cg05976652	rs4509706	0.090168	NA	NA	NA	NA	chr10:63662886-63663299	N_Shore	ARID5B	NM_032199	TSS200				10:63661298-63661469	Promoter_Associated	-0.571733	-1.56405	-7.49972	1.1665e-11	1.33808e-09	16.1695
cg14011833	chr17	79633787	-	cg14011833	rs114120030	0.014335	NA	NA	NA	NA	chr17:79633256-79634230	Island	CCDC137;C17orf90;CCDC137	NM_199287;NM_001039842;NM_199287	1stExon;TSS200;5'UTR			17:77243533-77244635	17:79632717-79634208	Promoter_Associated	-0.571722	-2.12107	-7.53358	9.77684e-12	1.14975e-09	16.3411
cg05965430	chr12	49962171	-	cg05965430	NA	NA	NA	NA	NA	NA	chr12:49961630-49962219	Island	MCRS1	NM_006337	TSS1500			12:48248335-48248769	12:49961171-49962582	Promoter_Associated	-0.571701	-2.1794	-9.77388	5.41192e-17	3.05148e-14	28.1204
cg19570781	chr5	158636635	+	cg19570781	NA	NA	NA	NA	NA	NA	chr5:158636218-158636949	Island						5:158567704-158569516	5:158636406-158636776	Promoter_Associated	-0.571656	-2.47111	-6.77738	4.70481e-10	3.21301e-08	12.5818
cg13648088	chr10	124768538	-	cg13648088	NA	NA	NA	NA	NA	NA	chr10:124767758-124768897	Island	ACADSB;ACADSB;IKZF5	NM_001609;NM_001609;NM_022466	1stExon;5'UTR;TSS1500			10:124757720-124759105	10:124768161-124768826	Promoter_Associated	-0.571423	-1.76905	-8.10609	4.7606e-13	8.24302e-11	19.2792
cg19435381	chr5	41870796	-	cg19435381	NA	NA	NA	NA	NA	NA	chr5:41869663-41870876	Island	OXCT1	NM_000436	TSS200			5:41905161-41906736	5:41869237-41871226	Promoter_Associated	-0.571134	-2.59371	-7.35543	2.46792e-11	2.55341e-09	15.4417
cg00968021	chr1	70876888	+	cg00968021	NA	NA	NA	NA	NA	NA	chr1:70876622-70877091	Island	CTH;CTH	NM_153742;NM_001902	TSS200;TSS200			1:70649186-70649854	1:70876206-70877496	Promoter_Associated	-0.571087	-2.56068	-7.85536	1.80308e-12	2.61446e-10	17.9841
cg14940871	chr18	77386828	+	cg14940871	NA	NA	NA	NA	NA	NA	chr18:77386827-77387050	Island						18:75487816-75488767			-0.571069	2.11775	-6.3912	3.18909e-09	1.60935e-07	10.7287
cg12230071	chr15	65822924	-	cg12230071	NA	NA	NA	NA	NA	NA	chr15:65822685-65823540	Island	PTPLAD1;PTPLAD1	NM_016395;NM_016395	5'UTR;1stExon			15:63609696-63610520	15:65822326-65823709	Promoter_Associated	-0.571057	-1.99081	-8.00019	8.36672e-13	1.34761e-10	18.7308
cg16374333	chr1	157103641	-	cg16374333	NA	NA	NA	NA	NA	NA		OpenSea	ETV3;ETV3	NM_005240;NM_001145312	3'UTR;Body				1:157103178-157103706	Promoter_Associated_Cell_type_specific	-0.570845	1.53912	-6.65304	8.75833e-10	5.44239e-08	11.9797
cg17972213	chr1	101704898	+	cg17972213	NA	NA	NA	NA	NA	NA	chr1:101701785-101702068	S_Shelf	S1PR1	NM_001400	Body			1:101477470-101478193	1:101703211-101705552	Promoter_Associated	-0.57042	0.987783	-6.60953	1.08732e-09	6.54927e-08	11.7702
cg24763869	chr17	3572311	-	cg24763869	NA	NA	NA	NA	NA	NA	chr17:3571224-3572618	Island	TMEM93;TMEM93;TAX1BP3	NM_001014764;NM_031298;NM_014604	5'UTR;5'UTR;TSS1500			17:3518002-3519534	17:3571650-3572399	Promoter_Associated	-0.569972	-1.39993	-9.4763	2.79206e-16	1.26384e-13	26.5227
cg03905758	chr4	174451468	+	cg03905758	NA	NA	NA	NA	NA	NA	chr4:174450046-174451469	Island	HAND2;NBLA00301	NM_021973;NR_003679	TSS200;TSS200	CDMR		4:174687699-174688082	4:174450694-174451555	Unclassified_Cell_type_specific	-0.5695	-0.505411	-7.80083	2.40491e-12	3.35619e-10	17.7041
cg14492773	chr5	56469900	-	cg14492773	NA	NA	NA	NA	NA	NA	chr5:56469018-56470521	Island	GPBP1;GPBP1;GPBP1;GPBP1	NM_001127235;NM_022913;NM_022913;NM_001127235	1stExon;1stExon;5'UTR;5'UTR			5:56504776-56506628	5:56469064-56470098	Promoter_Associated	-0.568829	-0.959206	-7.26183	4.00199e-11	3.89683e-09	14.9723
cg15974085	chr18	71815641	+	cg15974085	NA	NA	NA	NA	NA	NA	chr18:71814555-71815716	Island	C18orf55;FBXO15;FBXO15	NM_014177;NM_152676;NM_001142958	TSS200;TSS1500;TSS1500			18:69966490-69966761	18:71814856-71816018	Promoter_Associated	-0.568544	-2.23495	-8.74543	1.52165e-14	4.11585e-12	22.6299
cg19517476	chr19	14591301	-	cg19517476	NA	NA	NA	NA	NA	NA	chr19:14591032-14591308	Island	GIPC1;GIPC1;GIPC1;GIPC1;GIPC1;GIPC1	NM_202470;NM_202468;NM_202494;NM_202467;NM_005716;NM_202469	Body;Body;Body;Body;Body;Body			19:14452047-14452463	19:14590683-14591386	Unclassified_Cell_type_specific	-0.568155	2.6879	-7.1917	5.74034e-11	5.29959e-09	14.6221
cg24699005	chr19	1192342	-	cg24699005	NA	NA	NA	NA	NA	NA	chr19:1194461-1194863	N_Shelf							19:1192215-1192762	Unclassified_Cell_type_specific	-0.568048	-0.342815	-4.96691	2.25319e-06	3.32148e-05	4.41409
cg02744793	chr10	35378717	-	cg02744793	NA	NA	NA	NA	NA	NA	chr10:35378834-35379632	N_Shore	CUL2	NM_003591	5'UTR			10:35418659-35419628	10:35378408-35380247	Promoter_Associated	-0.568001	-0.791856	-11.2637	1.39959e-20	2.36112e-17	36.1601
cg26884886	chr6	32097857	+	cg26884886	rs204892	0.064583	NA	NA	NA	NA	chr6:32097820-32098086	Island	FKBPL	NM_022110	5'UTR			6:32205799-32206232	6:32097645-32098377	Promoter_Associated	-0.567916	-1.74239	-8.47052	6.73812e-14	1.50555e-11	21.1816
cg16063666	chr7	86974833	+	cg16063666	NA	NA	NA	NA	NA	NA	chr7:86974740-86975088	Island	TP53TG1;CROT;CROT;CROT	NR_015381;NM_021151;NR_026585;NM_001143935	TSS200;TSS200;TSS200;TSS200			7:86812469-86813143	7:86974272-86975684	Unclassified	-0.567663	-1.96871	-6.84913	3.27988e-10	2.36412e-08	12.9314
cg00875805	chr4	140656749	+	cg00875805	NA	NA	NA	NA	NA	NA	chr4:140655962-140657135	Island	MAML3	NM_018717	Body			4:140875445-140876234	4:140655440-140657159	Unclassified_Cell_type_specific	-0.567599	-1.5713	-6.69334	7.1645e-10	4.59123e-08	12.1743
cg01853632	chr3	43147395	+	cg01853632	NA	NA	NA	NA	NA	NA	chr3:43147184-43147713	Island	C3orf39;C3orf39	NM_032806;NM_032806	5'UTR;1stExon			3:43121866-43122690	3:43146658-43148258	Promoter_Associated	-0.567554	-0.909662	-7.31878	2.98291e-11	3.02514e-09	15.2576
cg26623416	chr11	18548628	+	cg26623416	rs34178768	0.031605	NA	NA	NA	NA	chr11:18548060-18548629	Island	TSG101	NM_006292	TSS200			11:18504637-18505306	11:18547608-18549264	Promoter_Associated	-0.56752	-2.09359	-8.33235	1.41764e-13	2.86024e-11	20.4578
cg20674839	chr19	51925322	-	cg20674839	NA	NA	NA	NA	NA	NA	chr19:51924999-51925413	Island				DMR		19:56616812-56617285	19:51925047-51925987	Unclassified	-0.567374	-1.5346	-10.0994	8.94278e-18	6.47679e-15	29.8733
cg12950166	chr12	122517149	+	cg12950166	rs192516463	0.0224	NA	NA	NA	NA	chr12:122516193-122517207	Island	MLXIP	NM_014938	1stExon			12:121000410-121001829			-0.567351	-1.34388	-9.17307	1.47601e-15	5.3821e-13	24.9013
cg15664069	chr6	2989243	-	cg15664069	NA	NA	NA	NA	NA	NA	chr6:2988855-2989549	Island	DKFZP686I15217;DKFZP686I15217	NR_026855;NR_026856	Body;Body			6:2933908-2934548	6:2988656-2990594	Promoter_Associated	-0.566868	-2.34916	-6.44543	2.44487e-09	1.28777e-07	10.9858
cg16810449	chr7	98973241	+	cg16810449	rs11980995	0.180155	NA	NA	NA	NA	chr7:98971649-98973170	S_Shore	ARPC1B	NM_005720	5'UTR				7:98971502-98973415	Promoter_Associated	-0.566814	-2.33816	-7.20206	5.44284e-11	5.06837e-09	14.6738
cg18851521	chr18	268131	-	cg18851521	rs79098569	0.040365	NA	NA	NA	NA	chr18:267710-268382	Island	THOC1	NM_005131	TSS200			18:257470-258526	18:267221-269144	Promoter_Associated	-0.566638	-1.47047	-10.0875	9.55163e-18	6.87037e-15	29.8092
cg06168050	chr17	30677336	+	cg06168050	NA	NA	NA	NA	NA	NA	chr17:30677001-30677460	Island	ZNF207;ZNF207;ZNF207	NM_001098507;NM_001032293;NM_003457	1stExon;1stExon;1stExon			17:27701083-27701789	17:30676667-30678012	Unclassified	-0.566487	-1.99882	-9.0308	3.21471e-15	1.05996e-12	24.1434
cg26327118	chr6	39693366	-	cg26327118	NA	NA	NA	NA	NA	NA	chr6:39692743-39692966	S_Shore	KIF6	NM_145027	TSS200	DMR		6:39800625-39801355	6:39692487-39693446	Promoter_Associated	-0.565835	-1.8463	-9.03009	3.2272e-15	1.06324e-12	24.1396
cg00010672	chr2	55281781	-	cg00010672	NA	NA	NA	NA	NA	NA	chr2:55276555-55278044	S_Shelf							2:55281274-55281989	Unclassified	-0.565803	2.03173	-5.7073	8.29292e-08	2.36848e-06	7.58334
cg08269986	chr1	35735167	+	cg08269986	NA	NA	NA	NA	NA	NA	chr1:35734223-35734855	S_Shore	ZMYM4	NM_005095	Body			1:35507651-35507773	1:35733660-35735305	Promoter_Associated	-0.565538	-2.08607	-6.58792	1.21036e-09	7.15693e-08	11.6664
cg11932961	chr4	129733571	+	cg11932961	NA	NA	NA	NA	NA	NA	chr4:129732322-129733985	Island	PHF17;PHF17	NM_024900;NM_199320	5'UTR;5'UTR			4:129951456-129953408	4:129733051-129733773	Unclassified	-0.565385	-2.13149	-7.74449	3.23637e-12	4.36011e-10	17.4155
cg27245606	chr6	31549038	-	cg27245606	NA	NA	NA	NA	NA	NA	chr6:31548436-31549277	Island	LTB;LTB	NM_002341;NM_009588	Body;3'UTR			6:31656416-31657221	6:31547692-31549746	Promoter_Associated	-0.565352	-2.24879	-6.72423	6.13979e-10	4.02231e-08	12.3238
cg22678932	chr22	22006201	+	cg22678932	rs861844	0.068472	NA	NA	NA	NA	chr22:22006079-22007048	Island	MIR130B;MIR301B	NR_029845;NR_030622	TSS1500;TSS1500			22:20335810-20336214	22:22005683-22007109	Unclassified	-0.565065	-1.78485	-7.93683	1.17126e-12	1.79302e-10	18.4036
cg20174699	chr12	50222232	-	cg20174699	NA	NA	NA	NA	NA	NA	chr12:50221558-50222609	Island	LOC100286844;NCKAP5L;LOC100286844;LOC100286844	NR_027500;NM_001037806;NR_027501;NR_027499	TSS200;TSS200;TSS200;TSS200			12:48507845-48508876	12:50220951-50222919	Promoter_Associated	-0.565011	-1.9811	-8.66176	2.39591e-14	6.05194e-12	22.188
cg19959974	chr12	75905392	+	cg19959974	NA	NA	NA	NA	NA	NA	chr12:75905219-75905518	Island	KRR1;KRR1	NM_007043;NM_007043	1stExon;5'UTR			12:74191315-74191967	12:75905015-75905798	Unclassified	-0.564959	-1.45945	-8.0208	7.49816e-13	1.22176e-10	18.8374
cg04314247	chr1	95286125	+	cg04314247	rs72958558	0.024703	NA	NA	NA	NA	chr1:95285602-95286319	Island	SLC44A3;SLC44A3;SLC44A3	NM_152369;NM_152369;NM_001114106	5'UTR;1stExon;Body			1:95058119-95058907			-0.564951	-1.44964	-6.91678	2.33087e-10	1.76671e-08	13.2626
cg16727006	chr16	87470545	-	cg16727006	NA	NA	NA	NA	NA	NA		OpenSea	ZCCHC14	NM_015144	Body		TRUE		16:87470340-87470595	Unclassified_Cell_type_specific	-0.564711	1.39175	-7.98822	8.91616e-13	1.41923e-10	18.6689
cg18382599	chr1	43124310	-	cg18382599	NA	NA	NA	NA	NA	NA	chr1:43123977-43124422	Island	PPIH	NM_006347	Body			1:42896444-42897381	1:43123377-43124495	Promoter_Associated	-0.564696	-0.772128	-10.8252	1.59531e-19	2.04525e-16	33.7926
cg24881229	chr11	93474015	+	cg24881229	NA	NA	NA	NA	NA	NA	chr11:93474085-93475075	N_Shore	C11orf54;TAF1D	NM_014039;NM_024116	TSS1500;5'UTR				11:93473631-93475441	Promoter_Associated	-0.564617	-1.51362	-6.03037	1.8198e-08	6.84788e-07	9.04571
cg08628601	chr15	52861409	+	cg08628601	NA	NA	NA	NA	NA	NA	chr15:52860752-52861410	Island	ARPP19	NM_006628	TSS200			15:50648058-50648845	15:52860258-52862015	Promoter_Associated_Cell_type_specific	-0.564533	-1.27228	-7.23524	4.58906e-11	4.39212e-09	14.8394
cg17626301	chr6	32820201	-	cg17626301	NA	NA	NA	NA	NA	NA	chr6:32820849-32822370	N_Shore	TAP1	NM_000593	Body						-0.564069	1.45346	-5.94309	2.75278e-08	9.65019e-07	8.64631
cg05130304	chr3	44379503	+	cg05130304	NA	NA	NA	NA	NA	NA	chr3:44379532-44380310	N_Shore	C3orf23;C3orf23;C3orf23	NM_001029839;NM_173826;NM_001029840	TSS1500;TSS1500;TSS200						-0.563502	-2.15691	-8.66812	2.31464e-14	5.89966e-12	22.2216
cg07480608	chr3	15352493	-	cg07480608	rs9836450	0.470277	NA	NA	NA	NA		OpenSea	SH3BP5;SH3BP5	NM_004844;NM_001018009	Body;5'UTR		TRUE		3:15352195-15352590	Unclassified	-0.563327	1.77665	-5.73648	7.24387e-08	2.12299e-06	7.7136
cg16879549	chr17	7146439	-	cg16879549	NA	NA	NA	NA	NA	NA	chr17:7145479-7146709	Island	GABARAP	NM_007278	TSS1500			17:7087042-7087378	17:7145320-7146850	Promoter_Associated	-0.562864	-1.68122	-6.10046	1.30241e-08	5.19856e-07	9.36868
cg15823064	chr1	87794194	-	cg15823064	NA	NA	NA	NA	NA	NA	chr1:87793802-87795142	Island	LMO4;LMO4	NM_006769;NM_006769	1stExon;5'UTR			1:87566398-87567764	1:87793812-87794373	Promoter_Associated	-0.562836	-1.88947	-7.42039	1.7623e-11	1.90794e-09	15.7687
cg01948217	chr20	36932385	+	cg01948217	NA	NA	NA	NA	NA	NA		OpenSea	BPI	NM_001725	TSS200						-0.562525	-1.28175	-8.12904	4.2117e-13	7.40555e-11	19.3984
cg04841346	chr1	145096723	+	cg04841346	rs74119774	0.021938	NA	NA	NA	NA	chr1:145096393-145096784	Island	SEC22B	NM_004892	Body			1:143807732-143808107	1:145096038-145097369	Unclassified	-0.562362	-1.93195	-7.67383	4.69228e-12	6.02954e-10	17.0544
cg12098645	chr12	69326716	+	cg12098645	rs7974965	0.078627	NA	NA	NA	NA	chr12:69327021-69327532	N_Shore	CPM;CPM;CPM	NM_001005502;NM_198320;NM_001874	5'UTR;5'UTR;5'UTR			12:67612814-67613799	12:69326064-69327911	Promoter_Associated	-0.562304	-1.70884	-7.36719	2.32215e-11	2.42529e-09	15.5008
cg13493109	chr1	22108764	-	cg13493109	rs78286556	0.056858	NA	NA	NA	NA	chr1:22109129-22110261	N_Shore	USP48;USP48	NM_001032730;NM_032236	Body;Body			1:21981304-21981352	1:22108625-22110429	Promoter_Associated	-0.562182	-2.11524	-8.36592	1.18363e-13	2.44565e-11	20.6333
cg12226306	chr3	105087718	+	cg12226306	NA	NA	NA	NA	NA	NA	chr3:105088072-105088339	N_Shore	ALCAM	NM_001627	Body			3:106570266-106571237	3:105087117-105088964	Promoter_Associated	-0.561809	-1.63095	-8.22242	2.55644e-13	4.78764e-11	19.8841
cg27308707	chr10	91461150	-	cg27308707	rs11598257	0.126915	NA	NA	NA	NA	chr10:91460899-91461615	Island	KIF20B	NM_016195	TSS1500			10:91450897-91451595	10:91460679-91462058	Promoter_Associated	-0.561538	-2.13198	-8.44059	7.91825e-14	1.73371e-11	21.0245
cg19349861	chr11	133402246	-	cg19349861	NA	NA	NA	NA	NA	NA		OpenSea	OPCML;OPCML	NM_001012393;NM_001012393	5'UTR;1stExon			11:132907363-132907577			-0.561515	-1.53613	-13.8784	8.27262e-27	7.72229e-23	50.0797
cg03710481	chr6	122931605	-	cg03710481	NA	NA	NA	NA	NA	NA	chr6:122931153-122931705	Island	PKIB;PKIB;PKIB;PKIB;PKIB	NM_032471;NM_181795;NM_181794;NM_032471;NM_181795	5'UTR;1stExon;5'UTR;1stExon;5'UTR		TRUE	6:122972853-122974198	6:122931110-122932087	Unclassified	-0.561452	-2.17479	-8.08325	5.3772e-13	9.12265e-11	19.1608
cg20067598	chr11	118928341	+	cg20067598	NA	NA	NA	NA	NA	NA	chr11:118927374-118928412	Island	HYOU1;HYOU1	NM_001130991;NM_006389	TSS1500;TSS1500			11:118432585-118433622	11:118926544-118928643	Promoter_Associated	-0.561343	-2.24907	-7.07084	1.06558e-10	8.99084e-09	14.0218
cg15243630	chr3	32147959	-	cg15243630	rs13095243	0.228806	NA	NA	NA	NA	chr3:32147826-32148874	Island	GPD1L	NM_015141	TSS200			3:32122831-32123837	3:32147510-32148764	Promoter_Associated	-0.561246	-1.99611	-7.70478	3.98818e-12	5.23038e-10	17.2124
cg20999932	chr14	73712574	+	cg20999932	NA	NA	NA	NA	NA	NA	chr14:73712288-73712911	Island	PAPLN	NM_173462	Body			14:72782042-72782684	14:73712117-73713096	Unclassified	-0.560333	0.832366	-7.95856	1.04374e-12	1.62727e-10	18.5157
cg11412876	chr6	112194702	+	cg11412876	NA	NA	NA	NA	NA	NA	chr6:112193835-112194854	Island	FYN	NM_002037	TSS200			6:112300552-112301746	6:112194444-112194977	Promoter_Associated	-0.56025	-1.55603	-10.1373	7.2463e-18	5.40659e-15	30.0782
cg18724912	chr7	75357247	+	cg18724912	rs79044350	0.041133	NA	NA	NA	NA		OpenSea	HIP1	NM_005338	Body		TRUE		7:75357104-75357976	Unclassified_Cell_type_specific	-0.560072	2.19011	-7.54223	9.34548e-12	1.1077e-09	16.3849
cg20060523	chr4	142557759	-	cg20060523	NA	NA	NA	NA	NA	NA	chr4:142557388-142558323	Island	IL15;IL15;IL15;IL15	NM_000585;NM_172174;NM_172174;NM_000585	5'UTR;1stExon;5'UTR;1stExon		TRUE	4:142776802-142777518	4:142557111-142558569	Promoter_Associated	-0.560016	-1.96807	-8.16135	3.54414e-13	6.3868e-11	19.5663
cg21099470	chr4	10459141	+	cg21099470	NA	NA	NA	NA	NA	NA	chr4:10458129-10459353	Island	ZNF518B	NM_053042	TSS200			4:10067138-10068870			-0.55993	-1.39778	-9.84044	3.74659e-17	2.21041e-14	28.4785
cg20363904	chr8	22552821	-	cg20363904	NA	NA	NA	NA	NA	NA	chr8:22547486-22553427	Island						8:22603167-22609289	8:22552483-22553106	Unclassified	-0.559802	-2.48183	-8.04359	6.64194e-13	1.10278e-10	18.9553
cg14320087	chr8	74005537	-	cg14320087	rs149477098	0.0192	NA	NA	NA	NA	chr8:74005021-74005856	Island	C8orf84	NM_153225	TSS200			8:74167482-74168473			-0.559624	-1.79794	-8.16374	3.49912e-13	6.31381e-11	19.5787
cg15593337	chr11	43902276	-	cg15593337	NA	NA	NA	NA	NA	NA	chr11:43902254-43902528	Island	ALKBH3	NM_139178	TSS200			11:43858710-43859141	11:43902004-43903295	Unclassified	-0.559576	-1.74743	-7.01828	1.39279e-10	1.13604e-08	13.762
cg18603276	chr17	8023961	+	cg18603276	NA	NA	NA	NA	NA	NA	chr17:8023960-8024239	Island	HES7;HES7	NM_032580;NM_001165967	3'UTR;3'UTR			17:7964686-7964991	17:8023440-8026239	Promoter_Associated	-0.559516	-0.306751	-6.52234	1.67425e-09	9.39476e-08	11.3523
cg22761551	chr5	175875380	-	cg22761551	NA	NA	NA	NA	NA	NA	chr5:175874629-175875428	Island	FAF2;FAF2	NM_014613;NM_014613	5'UTR;1stExon			5:175806771-175808447	5:175874154-175876094	Promoter_Associated	-0.55944	-1.78692	-5.53829	1.80188e-07	4.43231e-06	6.83654
cg04244535	chr14	23236155	-	cg04244535	rs45616941	0.079909	NA	NA	NA	NA	chr14:23235774-23236578	Island	OXA1L	NM_005015	Body			14:22305615-22306349	14:23235387-23236477	Promoter_Associated	-0.558962	-1.51966	-8.41429	9.12337e-14	1.96231e-11	20.8867
cg12566780	chr7	92157604	-	cg12566780	NA	NA	NA	NA	NA	NA	chr7:92157487-92158405	Island	PEX1;C7orf64	NM_000466;NM_032120	Body;TSS1500			7:91995367-91996315	7:92157051-92158374	Promoter_Associated	-0.558623	-1.57191	-7.54027	9.44148e-12	1.11593e-09	16.375
cg20015168	chr14	57046681	-	cg20015168	NA	NA	NA	NA	NA	NA	chr14:57046472-57046804	Island	C14orf101	NM_017799	1stExon			14:56116154-56116794	14:57045928-57046695	Promoter_Associated	-0.558504	-2.10342	-7.79875	2.43143e-12	3.38534e-10	17.6935
cg07996345	chr11	47600851	-	cg07996345	NA	NA	NA	NA	NA	NA	chr11:47600129-47600927	Island	KBTBD4;KBTBD4;NDUFS3;KBTBD4	NM_018095;NR_024222;NM_004551;NM_016506	TSS1500;TSS1500;Body;TSS1500			11:47556706-47557482	11:47599752-47601264	Promoter_Associated	-0.558471	-1.70903	-8.44054	7.92019e-14	1.73371e-11	21.0243
cg04527989	chr5	71614752	-	cg04527989	NA	NA	NA	NA	NA	NA	chr5:71616007-71616345	N_Shore	PTCD2;MRPS27	NM_024754;NM_015084	TSS1500;Body						-0.558322	2.30738	-5.92611	2.98252e-08	1.03149e-06	8.56898
cg18247339	chr14	35183597	-	cg18247339	rs10149653	0.257313	NA	NA	NA	NA	chr14:35183385-35184196	Island	CFL2;CFL2;CFL2;CFL2;CFL2	NM_138638;NR_028130;NM_021914;NR_028132;NR_028131	Body;Body;TSS1500;Body;Body			14:34253114-34253966	14:35183563-35184029	Promoter_Associated	-0.558291	-2.00586	-9.25487	9.42666e-16	3.63284e-13	25.3379
cg02384859	chr15	74862662	-	cg02384859	NA	NA	NA	NA	NA	NA		OpenSea	ARID3B	NM_006465	Body		TRUE				-0.558203	2.16039	-6.81388	3.91665e-10	2.75217e-08	12.7595
cg22854549	chr19	5904785	-	cg22854549	NA	NA	NA	NA	NA	NA	chr19:5903482-5905216	Island	VMAC;NDUFA11	NM_001017921;NM_175614	TSS200;TSS1500			19:5854483-5856183	19:5903681-5905078	Promoter_Associated	-0.558075	-1.88908	-7.82667	2.09818e-12	2.97992e-10	17.8368
cg09459719	chr3	141594525	+	cg09459719	rs10935443	0.094185	NA	NA	NA	NA	chr3:141594486-141596288	Island	ATP1B3	NM_001679	TSS1500			3:143077177-143077335	3:141593935-141595586	Promoter_Associated	-0.557641	-1.52645	-6.89741	2.57066e-10	1.92279e-08	13.1677
cg18364837	chr5	148737347	-	cg18364837	NA	NA	NA	NA	NA	NA	chr5:148737346-148737764	Island	PCYOX1L	NM_024028	TSS1500		TRUE	5:148717540-148718218	5:148736840-148738287	Promoter_Associated	-0.557591	-1.29112	-8.37735	1.11303e-13	2.31571e-11	20.6932
cg12840502	chr22	30116919	+	cg12840502	NA	NA	NA	NA	NA	NA	chr22:30116081-30117160	Island	CABP7	NM_182527	Body	DMR		22:28445886-28447149	22:30115764-30117149	Unclassified_Cell_type_specific	-0.557472	-1.67139	-6.08127	1.42761e-08	5.61242e-07	9.28005
cg17472985	chr3	160117717	+	cg17472985	NA	NA	NA	NA	NA	NA	chr3:160117012-160118878	Island	SMC4;IFT80;SMC4	NM_001002800;NM_020800;NM_005496	5'UTR;TSS1500;TSS1500			3:161600128-161600953			-0.557439	-1.45892	-7.35572	2.46421e-11	2.55083e-09	15.4431
cg04873026	chr21	30365177	+	cg04873026	NA	NA	NA	NA	NA	NA	chr21:30364965-30365342	Island	RNF160	NM_015565	1stExon			21:29286766-29287213	21:30364655-30365872	Promoter_Associated	-0.556886	-1.78048	-7.51679	1.0672e-11	1.24043e-09	16.256
cg07820310	chr20	44035078	-	cg07820310	NA	NA	NA	NA	NA	NA	chr20:44034458-44035954	Island	DBNDD2;DBNDD2;DBNDD2;SYS1-DBNDD2;DBNDD2	NM_001048224;NM_001048222;NM_001048223;NR_003189;NM_001048221	TSS200;5'UTR;TSS200;Body;5'UTR			20:43467659-43469389			-0.556773	-1.55383	-6.38636	3.26553e-09	1.64181e-07	10.7058
cg22696073	chr6	32939982	+	cg22696073	NA	NA	NA	NA	NA	NA	chr6:32939275-32940954	Island	BRD2;BRD2	NM_001113182;NM_005104	5'UTR;5'UTR			6:33047254-33049087	6:32939578-32940254	Unclassified	-0.556771	-1.88814	-8.4652	6.93435e-14	1.54365e-11	21.1536
cg23526204	chr20	43992176	-	cg23526204	NA	NA	NA	NA	NA	NA	chr20:43991615-43992376	Island	SYS1;SYS1-DBNDD2	NM_033542;NR_003189	Body;Body			20:43424958-43425759	20:43990837-43992453	Promoter_Associated	-0.556548	-2.41	-8.04185	6.70386e-13	1.11218e-10	18.9463
cg09202227	chr16	68482715	-	cg09202227	NA	NA	NA	NA	NA	NA	chr16:68480864-68482822	Island	SMPD3	NM_018667	TSS1500			16:67039314-67040523	16:68481931-68483031	Unclassified	-0.556317	-1.01058	-6.7482	5.44565e-10	3.62868e-08	12.44
cg24071726	chr2	171571151	+	cg24071726	NA	NA	NA	NA	NA	NA	chr2:171569877-171573904	Island	LOC440925;SP5	NR_027433;NM_001003845	TSS200;TSS1500		TRUE	2:171277816-171279780			-0.556284	-2.15459	-8.71708	1.77486e-14	4.70975e-12	22.4801
cg11239145	chr4	26320844	-	cg11239145	NA	NA	NA	NA	NA	NA	chr4:26320769-26321008	Island	RBPJ;RBPJ	NM_005349;NM_203283	TSS1500;TSS1500			4:25929874-25932591			-0.556258	-1.88864	-7.57763	7.76714e-12	9.41243e-10	16.5647
cg10624784	chr7	77427913	+	cg10624784	NA	NA	NA	NA	NA	NA	chr7:77427331-77428850	Island	PHTF2;PHTF2;TMEM60	NM_001127360;NM_001127358;NM_032936	TSS200;TSS200;TSS200			7:77265648-77266786	7:77427544-77428874	Promoter_Associated	-0.556065	-1.11098	-9.83405	3.88133e-17	2.27301e-14	28.4441
cg26628795	chr2	111435723	-	cg26628795	NA	NA	NA	NA	NA	NA	chr2:111435318-111435884	Island	BUB1	NM_004336	TSS200			2:111151790-111152351	2:111434842-111436820	Promoter_Associated	-0.556046	-1.23182	-9.50605	2.37038e-16	1.0966e-13	26.6821
cg15971888	chr8	67089599	-	cg15971888	NA	NA	NA	NA	NA	NA	chr8:67089249-67089962	Island	CRH	NM_000756	Body			8:67251735-67253142	8:67088727-67090297	Unclassified	-0.555979	-2.04041	-8.32756	1.45458e-13	2.92632e-11	20.4327
cg01217204	chr2	113239325	+	cg01217204	NA	NA	NA	NA	NA	NA	chr2:113239249-113240584	Island	TTL	NM_153712	TSS1500			2:112954825-112956700	2:113238201-113239426	Promoter_Associated	-0.555868	-1.83903	-8.02551	7.31266e-13	1.19597e-10	18.8617
cg19011844	chr17	10102232	-	cg19011844	rs57846964	0.385283	NA	NA	NA	NA	chr17:10101034-10102440	Island	GAS7	NM_201433	TSS1500	DMR		17:10041793-10043377	17:10101965-10102521	Unclassified_Cell_type_specific	-0.555507	-1.99353	-5.27438	5.90011e-07	1.14005e-05	5.69727
cg07580707	chr3	14220061	+	cg07580707	rs2607775	0.34387	NA	NA	NA	NA	chr3:14219715-14220408	Island	XPC;XPC;LSM3;XPC	NR_027299;NM_004628;NM_014463;NM_001145769	Body;1stExon;TSS200;1stExon			3:14194720-14195408	3:14219212-14221098	Promoter_Associated	-0.555384	-1.5607	-8.0899	5.1897e-13	8.85102e-11	19.1953
cg26326615	chr3	18485765	-	cg26326615	NA	NA	NA	NA	NA	NA	chr3:18485112-18487056	Island						3:18460177-18462192			-0.555293	-1.16414	-8.05592	6.22006e-13	1.03807e-10	19.0191
cg13645767	chr9	97766849	-	cg13645767	NA	NA	NA	NA	NA	NA	chr9:97766649-97767955	Island	C9orf3	NM_032823	Body			9:96806471-96807776	9:97766136-97767782	Unclassified	-0.555245	-1.65905	-7.67306	4.71124e-12	6.04651e-10	17.0505
cg13531588	chr14	75725958	+	cg13531588	NA	NA	NA	NA	NA	NA	chr14:75725748-75726029	Island					TRUE	14:74795475-74795897	14:75725328-75726411	Promoter_Associated	-0.555157	-2.2492	-7.93054	1.21098e-12	1.84575e-10	18.3712
cg07473001	chr8	73920952	-	cg07473001	rs56249802	0.01087	NA	NA	NA	NA	chr8:73920858-73921552	Island	TERF1;TERF1	NM_003218;NM_017489	TSS200;TSS200			8:74083413-74084162	8:73920517-73921866	Promoter_Associated	-0.554991	-2.04412	-8.34838	1.30062e-13	2.65602e-11	20.5416
cg04053862	chr2	179345017	-	cg04053862	NA	NA	NA	NA	NA	NA	chr2:179344852-179345483	Island	MIR548N;PLEKHA3	NR_031666;NM_019091	Body;TSS200			2:179053116-179053994	2:179344863-179345311	Promoter_Associated	-0.554537	-1.73581	-7.60352	6.78352e-12	8.34655e-10	16.6962
cg07586956	chr2	70336043	-	cg07586956	NA	NA	NA	NA	NA	NA		OpenSea					TRUE		2:70335775-70336369	Unclassified	-0.554527	1.50341	-5.94444	2.73528e-08	9.59813e-07	8.65246
cg25050392	chr6	24933103	+	cg25050392	rs2747672	0.047031	NA	NA	NA	NA		OpenSea					TRUE				-0.554371	1.52641	-5.53314	1.8446e-07	4.51649e-06	6.81401
cg15401922	chr6	157802439	+	cg15401922	NA	NA	NA	NA	NA	NA	chr6:157801062-157803377	Island	ZDHHC14;ZDHHC14	NM_024630;NM_153746	TSS200;TSS200			6:157721051-157723354			-0.554268	-1.54086	-8.69958	1.95168e-14	5.11117e-12	22.3876
cg01682111	chr16	1430087	+	cg01682111	NA	NA	NA	NA	NA	NA	chr16:1429050-1430104	Island	UNKL	NM_023076	TSS1500			16:1369016-1370105	16:1428912-1430497	Promoter_Associated	-0.554178	1.11255	-6.99749	1.54812e-10	1.2458e-08	13.6595
cg17700633	chr19	13263997	+	cg17700633	NA	NA	NA	NA	NA	NA	chr19:13260562-13264924	Island	IER2	NM_004907	5'UTR			19:13124547-13125966	19:13263300-13264179	Promoter_Associated	-0.553986	-2.27894	-8.99183	3.97712e-15	1.26949e-12	23.9362
cg19744158	chr22	42196655	+	cg19744158	rs139562	0.143431	NA	NA	NA	NA	chr22:42195953-42196961	Island	CCDC134	NM_024821	TSS200			22:40525918-40526879	22:42195438-42197365	Promoter_Associated	-0.553872	-2.04869	-7.47131	1.35248e-11	1.51824e-09	16.0258
cg26434548	chr7	129074607	-	cg26434548	NA	NA	NA	NA	NA	NA	chr7:129073722-129074700	Island	FAM40B;FAM40B	NM_020704;NM_001134336	Body;Body			7:128861016-128862230	7:129073394-129075055	Promoter_Associated	-0.553631	-1.63424	-9.54305	1.93342e-16	9.23961e-14	26.8805
cg21812670	chr1	76251636	+	cg21812670	NA	NA	NA	NA	NA	NA		OpenSea	SNORD45C;RABGGTB	NR_003042;NM_004582	TSS1500;TSS1500				1:76251370-76252590	Promoter_Associated	-0.553602	-0.361196	-10.9319	8.82151e-20	1.22297e-16	34.3691
cg01151424	chr11	17411006	+	cg01151424	rs35271178	0.313242	NA	NA	NA	NA	chr11:17410436-17411287	Island	KCNJ11;KCNJ11	NM_000525;NM_001166290	TSS1500;TSS200			11:17367035-17367826	11:17410124-17411995	Promoter_Associated	-0.553232	-1.49931	-7.89796	1.43917e-12	2.14225e-10	18.2033
cg20228115	chr3	167813730	+	cg20228115	NA	NA	NA	NA	NA	NA	chr3:167812829-167814102	Island	GOLIM4	NM_014498	TSS1500			3:169295320-169296890	3:167812347-167813937	Promoter_Associated	-0.552756	-1.67639	-8.67392	2.24308e-14	5.75235e-12	22.2522
cg07160044	chr13	24735301	+	cg07160044	NA	NA	NA	NA	NA	NA	chr13:24734771-24735538	Island	SPATA13;MIR2276;SPATA13	NM_001166271;NR_031753;NM_153023	5'UTR;TSS1500;5'UTR			13:23632772-23633583	13:24734470-24736039	Promoter_Associated	-0.552199	-2.12723	-7.6893	4.32625e-12	5.61069e-10	17.1334
cg11620238	chr5	32710663	-	cg11620238	NA	NA	NA	NA	NA	NA	chr5:32709910-32714450	Island	NPR3	NM_000908	TSS1500		TRUE	5:32745905-32746681	5:32709075-32710898	Unclassified	-0.552146	-2.59699	-6.26428	5.91644e-09	2.69181e-07	10.1311
cg07930552	chr6	133119739	+	cg07930552	rs3813347	0.171743	NA	NA	NA	NA	chr6:133119483-133119802	Island	C6orf192;C6orf192	NM_052831;NM_052831	5'UTR;1stExon			6:133161100-133161547	6:133119268-133120835	Unclassified	-0.55213	-1.83006	-8.08721	5.26482e-13	8.95732e-11	19.1813
cg06736242	chr7	141438205	-	cg06736242	NA	NA	NA	NA	NA	NA	chr7:141438004-141438393	Island	SSBP1;SSBP1;FLJ40852	NM_003143;NM_003143;NR_015392	1stExon;5'UTR;TSS200			7:141084489-141084836	7:141437630-141438803	Promoter_Associated	-0.551822	-2.43077	-5.78333	5.82583e-08	1.77657e-06	7.92348
cg17587997	chr6	112085781	-	cg17587997	rs80018833	0.064769	NA	NA	NA	NA		OpenSea	FYN	NM_002037	5'UTR		TRUE		6:112085509-112085883	Unclassified_Cell_type_specific	-0.551673	1.45095	-5.7927	5.57682e-08	1.71357e-06	7.96558
cg09700085	chr3	45838028	+	cg09700085	NA	NA	NA	NA	NA	NA	chr3:45837480-45838256	Island	SLC6A20;SLC6A20;SLC6A20;SLC6A20	NM_020208;NM_022405;NM_020208;NM_022405	1stExon;1stExon;5'UTR;5'UTR		TRUE	3:45812485-45813319	3:45837820-45838250	Unclassified_Cell_type_specific	-0.551586	-0.447955	-12.8789	1.88796e-24	8.91081e-21	44.8172
cg02668248	chr19	16437789	+	cg02668248	NA	NA	NA	NA	NA	NA	chr19:16435202-16438064	Island	KLF2	NM_016270	Body	RDMR		19:16296270-16299051			-0.551427	0.918719	-6.33913	4.11222e-09	1.98506e-07	10.4828
cg19683962	chr4	108852534	+	cg19683962	rs1493128	0.344591	NA	NA	NA	NA	chr4:108852495-108853387	Island	CYP2U1	NM_183075	TSS200			4:109071902-109072941	4:108851893-108853616	Promoter_Associated	-0.551198	-2.06898	-7.11244	8.61593e-11	7.53538e-09	14.228
cg16859420	chr8	41219116	+	cg16859420	NA	NA	NA	NA	NA	NA		OpenSea					TRUE				-0.551168	-1.20239	-8.71266	1.81791e-14	4.81184e-12	22.4567
cg01262337	chr3	53290205	+	cg01262337	NA	NA	NA	NA	NA	NA	chr3:53289533-53290213	Island	TKT;TKT;TKT	NM_001135055;NM_001064;NM_001135056	TSS200;TSS200;TSS200			3:53264178-53265253	3:53289962-53290366	Promoter_Associated	-0.551025	-1.74263	-5.55548	1.66604e-07	4.16249e-06	6.91192
cg24972377	chr12	122326574	+	cg24972377	NA	NA	NA	NA	NA	NA	chr12:122326482-122327044	Island	PSMD9	NM_002813	TSS200			12:120810771-120811409	12:122325820-122327811	Promoter_Associated	-0.550968	-1.93625	-10.3243	2.57107e-18	2.21548e-15	31.0869
cg16469046	chr2	99062999	-	cg16469046	NA	NA	NA	NA	NA	NA	chr2:99061174-99061848	S_Shore	INPP4A;INPP4A;INPP4A;INPP4A	NM_001566;NM_004027;NM_001134224;NM_001134225	5'UTR;5'UTR;5'UTR;5'UTR		TRUE		2:99062689-99063351	Promoter_Associated	-0.550947	1.46564	-6.27187	5.70266e-09	2.61287e-07	10.1667
cg07786657	chr1	167487633	-	cg07786657	rs35864197	0.096203	NA	NA	NA	NA		OpenSea	CD247;CD247	NM_198053;NM_000734	Body;Body			1:165754249-165754303	1:167486693-167488230	Promoter_Associated_Cell_type_specific	-0.550851	0.9099	-6.83115	3.59073e-10	2.55045e-08	12.8437
cg14789178	chr19	5904119	-	cg14789178	NA	NA	NA	NA	NA	NA	chr19:5903482-5905216	Island	VMAC;NDUFA11	NM_001017921;NM_175614	TSS1500;TSS200			19:5854483-5856183	19:5903681-5905078	Promoter_Associated	-0.550799	-1.94347	-8.85484	8.3932e-15	2.47243e-12	23.2091
cg21998473	chr1	113051139	-	cg21998473	NA	NA	NA	NA	NA	NA	chr1:113050813-113052301	Island	WNT2B;WNT2B	NM_004185;NM_024494	Body;TSS1500		TRUE	1:112852159-112853944			-0.550703	-1.2288	-7.81001	2.29121e-12	3.22539e-10	17.7512
cg15854934	chr14	55518152	-	cg15854934	NA	NA	NA	NA	NA	NA	chr14:55518131-55518957	Island	MAPK1IP1L	NM_144578	TSS1500			14:54587762-54588710	14:55517809-55519632	Promoter_Associated	-0.550656	-2.20896	-8.32354	1.48638e-13	2.98174e-11	20.4117
cg00050247	chr6	33216585	+	cg00050247	NA	NA	NA	NA	NA	NA	chr6:33216103-33217463	Island						6:33324082-33325607	6:33215783-33217632	Promoter_Associated	-0.550498	-2.52496	-7.35793	2.43614e-11	2.52613e-09	15.4542
cg21776568	chr13	95254007	+	cg21776568	rs3897474	0.285963	NA	NA	NA	NA	chr13:95253814-95254569	Island	GPR180	NM_180989	TSS200			13:94051740-94052570	13:95253449-95254849	Promoter_Associated	-0.55046	-1.60354	-7.38358	2.13311e-11	2.24911e-09	15.5832
cg03052970	chr17	64961530	+	cg03052970	NA	NA	NA	NA	NA	NA	chr17:64961007-64962321	Island	CACNG4	NM_014405	Body			17:62390899-62392977	17:64961410-64962596	Unclassified_Cell_type_specific	-0.550419	-1.66765	-5.30537	5.14162e-07	1.01993e-05	5.82928
cg00095594	chr1	236228625	+	cg00095594	rs7548918	0.392998	NA	NA	NA	NA	chr1:236227682-236228817	Island	NID1	NM_002508	TSS200	DMR		1:234293973-234295835	1:236227502-236228862	Unclassified	-0.550347	-2.16	-5.34725	4.26593e-07	8.77125e-06	6.00847
cg25645657	chr5	52776244	+	cg25645657	NA	NA	NA	NA	NA	NA	chr5:52775533-52776645	Island	FST;FST	NM_006350;NM_013409	TSS1500;TSS1500			5:52811267-52812402			-0.55029	-1.85147	-6.9059	2.46268e-10	1.85192e-08	13.2093
cg15718222	chr1	6483926	+	cg15718222	NA	NA	NA	NA	NA	NA	chr1:6484503-6485327	N_Shore	ESPN	NM_031475	TSS1500		TRUE		1:6482941-6484702	Unclassified	-0.550195	-1.72763	-7.66863	4.82222e-12	6.1701e-10	17.0279
cg07138452	chr17	17141020	-	cg07138452	NA	NA	NA	NA	NA	NA	chr17:17140117-17141080	Island	FLCN;FLCN	NM_144606;NM_144997	TSS1500;TSS1500			17:17081708-17081790	17:17139889-17141270	Promoter_Associated	-0.550053	1.01662	-8.68076	2.16139e-14	5.59065e-12	22.2883
cg09115713	chr16	88832476	-	cg09115713	NA	NA	NA	NA	NA	NA		OpenSea	FAM38A	NM_001142864	Body			16:87359943-87360074			-0.549874	1.76178	-7.39066	2.05617e-11	2.18002e-09	15.6189
cg14905632	chr17	38333933	+	cg14905632	NA	NA	NA	NA	NA	NA	chr17:38333605-38334795	Island	RAPGEFL1	NM_016339	TSS1500			17:35587134-35588286	17:38333236-38334643	Gene_Associated_Cell_type_specific	-0.549833	-1.52871	-9.9323	2.25455e-17	1.44368e-14	28.973
cg11788103	chr19	12833533	-	cg11788103	NA	NA	NA	NA	NA	NA	chr19:12833104-12833574	Island	TNPO2;TNPO2;TNPO2	NM_001136196;NM_013433;NM_001136195	TSS200;TSS1500;5'UTR			19:12694433-12694840	19:12832505-12834056	Promoter_Associated	-0.549733	-1.49072	-10.6008	5.54396e-19	5.97133e-16	32.5803
cg05984044	chr4	47034181	+	cg05984044	NA	NA	NA	NA	NA	NA	chr4:47034427-47034940	N_Shore	GABRB1	NM_000812	Body		TRUE	4:46728938-46729027			-0.549732	-1.23918	-7.96148	1.02768e-12	1.6063e-10	18.5308
cg10835306	chr9	139396760	+	cg10835306	NA	NA	NA	NA	NA	NA	chr9:139396205-139397040	Island	NOTCH1	NM_017617	Body			9:138516051-138516888			-0.549351	2.88729	-3.35979	0.00104316	0.00499391	-1.37259
cg03191504	chr2	101922427	-	cg03191504	NA	NA	NA	NA	NA	NA	chr2:101924364-101925357	N_Shore	RNF149	NM_173647	Body						-0.549249	1.89558	-7.02579	1.34058e-10	1.09922e-08	13.7991
cg15459695	chr2	236403016	-	cg15459695	NA	NA	NA	NA	NA	NA	chr2:236401799-236403946	Island	AGAP1;AGAP1;AGAP1;AGAP1	NM_001037131;NM_014914;NM_014914;NM_001037131	1stExon;1stExon;5'UTR;5'UTR			2:236066539-236068779			-0.54922	-1.41192	-8.18743	3.08293e-13	5.65267e-11	19.7019
cg01765111	chr1	37784244	-	cg01765111	NA	NA	NA	NA	NA	NA	chr1:37783611-37784258	Island						1:37556206-37556845			-0.548892	0.0440024	-5.75858	6.53717e-08	1.95489e-06	7.81249
cg26403284	chr3	122512611	-	cg26403284	NA	NA	NA	NA	NA	NA	chr3:122512485-122512798	Island	DIRC2;HSPBAP1;HSPBAP1	NM_032839;NM_024610;NM_024610	TSS1500;5'UTR;1stExon			3:123995077-123995488	3:122512493-122512969	Promoter_Associated	-0.548832	-1.20727	-8.77234	1.3147e-14	3.62375e-12	22.7722
cg00432041	chr8	67341355	-	cg00432041	NA	NA	NA	NA	NA	NA	chr8:67340796-67342111	Island	RRS1;RRS1	NM_015169;NM_015169	5'UTR;1stExon			8:67503351-67504710	8:67341024-67341587	Promoter_Associated	-0.548533	-1.49464	-9.41407	3.93196e-16	1.69056e-13	26.1893
cg07737236	chr3	161089327	+	cg07737236	NA	NA	NA	NA	NA	NA	chr3:161089626-161090649	N_Shore	C3orf57;C3orf57	NM_001040100;NM_001040100	1stExon;5'UTR			3:162571985-162572042	3:161089152-161090672	Unclassified_Cell_type_specific	-0.548342	-1.96161	-13.2289	2.79454e-25	1.7263e-21	46.6698
cg17823076	chr12	53574937	-	cg17823076	NA	NA	NA	NA	NA	NA	chr12:53574025-53575150	Island	ZNF740;CSAD	NM_001004304;NM_015989	5'UTR;TSS1500			12:51860236-51861403	12:53573608-53575311	Promoter_Associated	-0.547524	-1.94079	-6.88224	2.77539e-10	2.0529e-08	13.0934
cg18482256	chr19	38865041	-	cg18482256	NA	NA	NA	NA	NA	NA	chr19:38865263-38865733	N_Shore	PSMD8	NM_002812	TSS200				19:38864741-38865890	Promoter_Associated	-0.547456	-1.82439	-7.73633	3.37846e-12	4.52252e-10	17.3737
cg00603717	chr13	46039090	+	cg00603717	NA	NA	NA	NA	NA	NA	chr13:46038953-46039681	Island	COG3;COG3	NM_031431;NM_031431	5'UTR;1stExon			13:44936964-44937728	13:46038562-46040153	Promoter_Associated	-0.547315	-2.01773	-8.15753	3.61719e-13	6.50172e-11	19.5464
cg10570662	chr22	19159548	-	cg10570662	NA	NA	NA	NA	NA	NA	chr22:19158703-19159722	Island						22:17538704-17539711	22:19157923-19159907	Promoter_Associated	-0.546952	-0.863521	-8.04509	6.58925e-13	1.09447e-10	18.9631
cg16532400	chr7	150217056	-	cg16532400	NA	NA	NA	NA	NA	NA		OpenSea	GIMAP7	NM_153236	5'UTR						-0.546639	1.82532	-6.42427	2.71233e-09	1.4047e-07	10.8854
cg01411982	chr11	134123293	+	cg01411982	rs114085882	0.013901	NA	NA	NA	NA	chr11:134123209-134123996	Island	THYN1;THYN1;THYN1;ACAD8;THYN1;THYN1	NM_014174;NM_001037304;NM_199297;NM_014384;NM_199298;NM_001037305	TSS200;TSS200;TSS200;TSS200;TSS200;TSS200			11:133628420-133629180	11:134122284-134123878	Promoter_Associated	-0.54634	-2.20332	-8.68028	2.16699e-14	5.60168e-12	22.2857
cg27247697	chr2	87018054	+	cg27247697	NA	NA	NA	NA	NA	NA	chr2:87015974-87018182	Island	CD8A;CD8A;CD8A;CD8A;CD8A;CD8A	NM_001145873;NM_171827;NM_001768;NR_027353;NM_171827;NM_001768	5'UTR;1stExon;5'UTR;Body;5'UTR;1stExon	DMR	TRUE	2:86869486-86871693	2:87017016-87018745	Unclassified_Cell_type_specific	-0.546184	-1.76538	-9.33439	6.09245e-16	2.49738e-13	25.7629
cg09032544	chr1	167487295	-	cg09032544	rs1773552	0.147259	NA	NA	NA	NA		OpenSea	CD247;CD247	NM_198053;NM_000734	Body;Body			1:165753578-165754116	1:167486693-167488230	Promoter_Associated_Cell_type_specific	-0.546042	1.26158	-6.42918	2.64784e-09	1.37622e-07	10.9086
cg27519942	chr1	245318232	+	cg27519942	NA	NA	NA	NA	NA	NA	chr1:245316547-245320247	Island	KIF26B	NM_018012	TSS200			1:243383116-243387263			-0.545747	-2.1312	-8.57054	3.92609e-14	9.38116e-12	21.7073
cg11650013	chr2	149632960	-	cg11650013	NA	NA	NA	NA	NA	NA	chr2:149632682-149633882	Island	KIF5C;KIF5C	NM_004522;NM_004522	5'UTR;1stExon	DMR		2:149349153-149350607			-0.545712	-1.8096	-8.2622	2.06572e-13	3.97497e-11	20.0915
cg05920635	chr6	55039622	-	cg05920635	NA	NA	NA	NA	NA	NA	chr6:55039170-55039392	S_Shore	HCRTR2	NM_001526	Body	DMR	TRUE	6:55147141-55147658			-0.545677	-1.58271	-12.6528	6.51815e-24	2.55892e-20	43.6148
cg23930083	chr7	100816912	+	cg23930083	rs757720	0.216255	NA	NA	NA	NA	chr7:100815484-100816995	Island	C7orf52	NM_198571	Body			7:100603313-100603661	7:100816649-100817846	Unclassified	-0.545657	-1.11548	-7.77006	2.82852e-12	3.87528e-10	17.5464
cg10800280	chr6	36646508	-	cg10800280	NA	NA	NA	NA	NA	NA	chr6:36646244-36648465	Island	CDKN1A;CDKN1A;CDKN1A;CDKN1A	NM_000389;NM_000389;NM_078467;NM_078467	5'UTR;1stExon;1stExon;5'UTR			6:36754276-36756443	6:36646229-36646600	Unclassified	-0.545622	-1.13342	-9.49438	2.52759e-16	1.15785e-13	26.6196
cg03609598	chr5	56110824	+	cg03609598	rs6885541	0.306011	NA	NA	NA	NA	chr5:56110725-56112909	Island	MAP3K1	NM_005921	TSS200			5:56146504-56148666	5:56110637-56110915	Promoter_Associated_Cell_type_specific	-0.545405	-1.86095	-6.1792	8.92431e-09	3.79816e-07	9.73384
cg05792022	chr13	41239732	+	cg05792022	NA	NA	NA	NA	NA	NA	chr13:41238500-41241750	Island	FOXO1	NM_002015	1stExon			13:40136501-40138924			-0.545274	-0.745694	-9.41649	3.8801e-16	1.6734e-13	26.2023
cg12299026	chr11	67195829	-	cg12299026	NA	NA	NA	NA	NA	NA	chr11:67195800-67196190	Island	RPS6KB2	NM_003952	TSS200			11:66952141-66952834	11:67195319-67196509	Promoter_Associated	-0.544972	-1.90778	-8.88074	7.28938e-15	2.17626e-12	23.3464
cg26900458	chr8	128806889	+	cg26900458	NA	NA	NA	NA	NA	NA	chr8:128806081-128806899	Island	MIR1204;PVT1	NR_031609;NR_003367	TSS1500;Body			8:128875303-128876262	8:128806620-128807486	Promoter_Associated	-0.544844	-1.83151	-8.02568	7.30609e-13	1.19595e-10	18.8626
cg12414872	chr3	52030010	-	cg12414872	rs62259757	0.043876	NA	NA	NA	NA	chr3:52029757-52030058	Island	RPL29	NM_000992	TSS200			3:52004824-52005070	3:52028955-52030293	Promoter_Associated	-0.54473	-2.1307	-9.67443	9.37057e-17	4.91416e-14	27.5858
cg27666046	chr17	80279077	+	cg27666046	NA	NA	NA	NA	NA	NA	chr17:80278861-80279563	Island	SECTM1	NM_003004	3'UTR		TRUE	17:77872151-77872384	17:80278522-80280207	Unclassified	-0.544153	1.14906	-6.52463	1.65539e-09	9.30637e-08	11.3632
cg21945992	chr3	48956913	+	cg21945992	NA	NA	NA	NA	NA	NA	chr3:48955810-48956938	Island	ARIH2;C3orf71	NM_006321;NM_001123040	5'UTR;TSS200			3:48930815-48931942	3:48955571-48957614	Promoter_Associated	-0.54399	-2.29326	-6.80701	4.05419e-10	2.83375e-08	12.726
cg07696485	chr3	36986642	+	cg07696485	NA	NA	NA	NA	NA	NA	chr3:36985540-36987041	Island	TRANK1	NM_014831	TSS200	DMR		3:36960545-36962066	3:36985431-36987301	Promoter_Associated	-0.543979	-1.67767	-8.51131	5.40691e-14	1.24316e-11	21.3958
cg01958203	chr7	99098094	+	cg01958203	NA	NA	NA	NA	NA	NA	chr7:99097277-99098104	Island	ZNF394	NM_032164	TSS1500			7:98935148-98936031	7:99097062-99098354	Promoter_Associated	-0.543886	-0.519364	-8.78714	1.21307e-14	3.37462e-12	22.8505
cg04631804	chr4	110624697	+	cg04631804	NA	NA	NA	NA	NA	NA	chr4:110623959-110624831	Island	CASP6;CASP6	NM_001226;NM_032992	TSS200;TSS200			4:110843409-110844335	4:110622908-110625046	Promoter_Associated	-0.543839	-1.54141	-7.19729	5.57768e-11	5.17215e-09	14.65
cg12922032	chr2	32582209	+	cg12922032	rs115758817	0.028236	NA	NA	NA	NA	chr2:32581746-32583265	Island	BIRC6;BIRC6	NM_016252;NM_016252	1stExon;5'UTR			2:32435192-32436953	2:32581859-32582421	Promoter_Associated	-0.543818	-0.877255	-9.01746	3.45764e-15	1.12942e-12	24.0725
cg20874811	chr17	54991629	+	cg20874811	NA	NA	NA	NA	NA	NA	chr17:54990832-54991771	Island	TRIM25	NM_005082	TSS1500			17:52345832-52346829	17:54990563-54992092	Promoter_Associated	-0.543452	-1.88673	-7.39151	2.0472e-11	2.1749e-09	15.6232
cg19452853	chr22	24552846	+	cg19452853	rs879756	0.34931	NA	NA	NA	NA	chr22:24551813-24552696	S_Shore	CABIN1	NM_012295	Body			22:22881858-22882911	22:24552788-24553242	Promoter_Associated	-0.54336	-2.31992	-8.03026	7.13036e-13	1.17367e-10	18.8863
cg26539232	chr19	924834	+	cg26539232	rs78340397	0.029974	NA	NA	NA	NA	chr19:924788-925001	Island	ARID3A	NM_005224	TSS1500						-0.543293	-1.78686	-7.66275	4.9732e-12	6.33433e-10	16.9979
cg01771876	chr2	11886613	-	cg01771876	NA	NA	NA	NA	NA	NA	chr2:11886249-11887207	Island	LPIN1	NM_145693	TSS200			2:11803701-11804658	2:11886139-11887754	Promoter_Associated	-0.543225	-2.14486	-6.45138	2.37443e-09	1.25761e-07	11.0141
cg22217449	chr21	47845788	-	cg22217449	NA	NA	NA	NA	NA	NA	chr21:47845595-47845864	Island	PCNT	NM_006031	Body			21:46669457-46670310	21:47845617-47845901	Unclassified_Cell_type_specific	-0.54313	1.57493	-7.03825	1.25818e-10	1.0408e-08	13.8606
cg06627077	chr19	47617100	-	cg06627077	NA	NA	NA	NA	NA	NA	chr19:47615253-47617101	Island	ZC3H4	NM_015168	TSS200			19:52307068-52308941	19:47615799-47617263	Promoter_Associated	-0.542867	-1.71292	-6.15419	1.00651e-08	4.1936e-07	9.61762
cg09799432	chr1	87170127	-	cg09799432	NA	NA	NA	NA	NA	NA	chr1:87169875-87171015	Island	SH3GLB1	NM_016009	TSS200			1:86942674-86943603	1:87169355-87170697	Promoter_Associated	-0.542766	-1.38843	-7.89813	1.43787e-12	2.14107e-10	18.2042
cg08111682	chr17	41467066	+	cg08111682	NA	NA	NA	NA	NA	NA		OpenSea	LOC100130581;LOC100130581	NR_027413;NR_027412	TSS1500;TSS1500			17:38822479-38822593	17:41465504-41467373	NonGene_Associated	-0.542589	-1.71821	-8.26529	2.03174e-13	3.92035e-11	20.1076
cg08889044	chr22	42949946	-	cg08889044	NA	NA	NA	NA	NA	NA	chr22:42949592-42950304	Island	SERHL2;SERHL2	NM_014509;NM_014509	1stExon;5'UTR			22:41279537-41280240	22:42949457-42950202	Unclassified	-0.542396	-1.65991	-7.71207	3.83825e-12	5.05585e-10	17.2497
cg06795559	chr20	5931181	+	cg06795559	rs113126937	0.019671	NA	NA	NA	NA	chr20:5930962-5931623	Island	MCM8;MCM8;TRMT6	NM_182802;NM_032485;NM_015939	TSS200;TSS200;TSS200			20:5878838-5879623	20:5930510-5932383	Promoter_Associated	-0.54236	-1.02683	-7.03016	1.3111e-10	1.07757e-08	13.8207
cg13670615	chr19	49140625	-	cg13670615	NA	NA	NA	NA	NA	NA	chr19:49140156-49141131	Island	SEC1;DBP;DBP	NR_004401;NM_001352;NM_001352	TSS1500;5'UTR;1stExon			19:53831559-53832990	19:49139930-49141772	Promoter_Associated	-0.542098	-1.21918	-10.7524	2.38979e-19	2.91822e-16	33.3993
cg19955521	chr10	1102667	-	cg19955521	NA	NA	NA	NA	NA	NA	chr10:1102144-1103341	Island	WDR37	NM_014023	TSS200			10:1092168-1093472	10:1102022-1103967	Promoter_Associated	-0.542004	-2.27325	-7.65931	5.06376e-12	6.43018e-10	16.9804
cg11257429	chr5	178016796	+	cg11257429	rs150318406	0.0133	NA	NA	NA	NA	chr5:178016558-178017670	Island	COL23A1	NM_173465	Body	DMR		5:177948865-177950318	5:178016524-178018441	Promoter_Associated	-0.541731	-2.20394	-7.744	3.24479e-12	4.37005e-10	17.4129
cg23347987	chr14	99737609	-	cg23347987	NA	NA	NA	NA	NA	NA	chr14:99736040-99737584	S_Shore	BCL11B;BCL11B;BCL11B;BCL11B	NM_022898;NM_138576;NM_022898;NM_138576	1stExon;1stExon;5'UTR;5'UTR			14:98806556-98807444			-0.541718	-1.83696	-7.60968	6.56816e-12	8.11484e-10	16.7276
cg24061580	chr7	151573966	+	cg24061580	NA	NA	NA	NA	NA	NA	chr7:151572761-151575106	Island	PRKAG2;PRKAG2	NM_016203;NM_016203	5'UTR;1stExon			7:151203370-151206297			-0.541595	-0.441173	-8.79273	1.17679e-14	3.29333e-12	22.8801
cg06464594	chr18	59560191	-	cg06464594	NA	NA	NA	NA	NA	NA	chr18:59560494-59562016	N_Shore	RNF152;RNF152	NM_173557;NM_173557	1stExon;5'UTR	CDMR		18:57711164-57713384			-0.541431	-1.9593	-6.53779	1.55125e-09	8.80573e-08	11.4261
cg20956633	chr20	19997839	-	cg20956633	NA	NA	NA	NA	NA	NA	chr20:19997704-19998559	Island	NAA20;NAA20;NAA20	NM_016100;NM_181527;NM_181528	TSS200;TSS1500;TSS200			20:19945705-19946655	20:19997567-19999354	Promoter_Associated	-0.541212	-1.79057	-7.81189	2.26858e-12	3.19658e-10	17.7609
cg25444017	chr11	93475004	+	cg25444017	NA	NA	NA	NA	NA	NA	chr11:93474085-93475075	Island	TAF1D;C11orf54	NM_024116;NM_014039	TSS1500;5'UTR			11:93114593-93114703	11:93473631-93475441	Promoter_Associated	-0.540887	-1.60322	-9.36314	5.20228e-16	2.16795e-13	25.9167
cg26338428	chr4	148767763	-	cg26338428	NA	NA	NA	NA	NA	NA		OpenSea	ARHGAP10	NM_024605	Body		TRUE		4:148767762-148767788	Unclassified_Cell_type_specific	-0.540813	1.72739	-6.5608	1.38438e-09	8.00782e-08	11.5363
cg14094063	chr7	140624470	+	cg14094063	NA	NA	NA	NA	NA	NA	chr7:140623997-140624949	Island	BRAF	NM_004333	1stExon			7:140270353-140271536	7:140623507-140625467	Promoter_Associated	-0.540599	-2.12813	-8.26072	2.08223e-13	4.00307e-11	20.0837
cg25634484	chr8	8559074	+	cg25634484	NA	NA	NA	NA	NA	NA	chr8:8559131-8560867	N_Shore	CLDN23	NM_194284	TSS1500			8:8596484-8598319	8:8558725-8560039	Unclassified	-0.540332	-1.30321	-9.38911	4.51025e-16	1.90795e-13	26.0557
cg08386886	chr17	41277274	+	cg08386886	NA	NA	NA	NA	NA	NA	chr17:41278134-41278460	N_Shore	BRCA1;BRCA1;BRCA1;BRCA1;BRCA1;NBR2;BRCA1	NM_007300;NR_027676;NM_007294;NM_007298;NM_007299;NR_003108;NM_007297	5'UTR;Body;5'UTR;TSS1500;5'UTR;TSS1500;5'UTR			17:38530585-38531313	17:41277171-41278081	Promoter_Associated	-0.540262	-1.20244	-8.10303	4.83887e-13	8.35635e-11	19.2634
cg18802567	chr5	171433913	+	cg18802567	NA	NA	NA	NA	NA	NA	chr5:171433004-171434082	Island	FBXW11;FBXW11;FBXW11	NM_033644;NM_012300;NM_033645	TSS200;TSS200;TSS200			5:171365432-171367032	5:171432772-171434743	Unclassified	-0.540217	-0.935461	-9.81049	4.42092e-17	2.53698e-14	28.3173
cg00954536	chr5	110427846	+	cg00954536	NA	NA	NA	NA	NA	NA	chr5:110427777-110428270	Island	WDR36	NM_139281	TSS200			5:110455694-110456406	5:110427222-110428595	Promoter_Associated	-0.540126	-2.12523	-8.18835	3.06783e-13	5.62744e-11	19.7067
cg17421506	chr11	18656159	-	cg17421506	NA	NA	NA	NA	NA	NA	chr11:18655811-18656482	Island	SPTY2D1	NM_194285	TSS200			11:18612004-18613058	11:18655239-18656721	Promoter_Associated	-0.540047	-1.70951	-6.49728	1.89448e-09	1.04067e-07	11.2326
cg13494334	chr14	75593888	-	cg13494334	rs12890371	0.46908	NA	NA	NA	NA	chr14:75593293-75594011	Island	NEK9	NM_033116	TSS200			14:74663047-74663759	14:75592469-75594248	Promoter_Associated	-0.540019	-1.69585	-7.42297	1.73884e-11	1.88448e-09	15.7817
cg17384889	chr6	28227068	-	cg17384889	NA	NA	NA	NA	NA	NA	chr6:28226979-28227483	Island	NKAPL	NM_001007531	TSS200			6:28334856-28335576	6:28226863-28227240	Promoter_Associated_Cell_type_specific	-0.540006	0.0226838	-6.59938	1.14353e-09	6.82709e-08	11.7214
cg26165041	chr14	81686232	-	cg26165041	NA	NA	NA	NA	NA	NA	chr14:81686385-81687885	N_Shore	GTF2A1;GTF2A1	NM_201595;NM_015859	5'UTR;Body			14:80755886-80755986			-0.539933	-2.33888	-7.06374	1.10489e-10	9.27695e-09	13.9867
cg05451654	chr3	155572045	-	cg05451654	NA	NA	NA	NA	NA	NA	chr3:155572358-155572604	N_Shore	SLC33A1;SLC33A1	NM_004733;NM_004733	1stExon;5'UTR			3:157054205-157055524	3:155571333-155573025	Promoter_Associated	-0.539915	-2.35207	-7.14991	7.11249e-11	6.37173e-09	14.4141
cg26519141	chr15	26108807	+	cg26519141	NA	NA	NA	NA	NA	NA	chr15:26107503-26108818	Island	ATP10A	NM_024490	TSS1500			15:23658574-23660111			-0.53983	-2.36655	-9.16794	1.51813e-15	5.49751e-13	24.8739
cg20366284	chr2	136876766	-	cg20366284	NA	NA	NA	NA	NA	NA	chr2:136876711-136877051	Island	CXCR4	NM_003467	TSS1500	DMR		2:136593041-136593556			-0.539701	-1.63882	-7.37441	2.23692e-11	2.34502e-09	15.5371
cg14790772	chr1	193090742	-	cg14790772	rs78381914	0.013272	NA	NA	NA	NA	chr1:193090728-193091224	Island	CDC73	NM_024529	TSS1500			1:191357280-191358201	1:193090265-193092096	Promoter_Associated	-0.539568	-1.08394	-9.86665	3.24134e-17	1.95628e-14	28.6195
cg22689323	chr8	143926325	-	cg22689323	NA	NA	NA	NA	NA	NA		OpenSea	GML	NM_002066	Body				8:143925755-143926503	Unclassified_Cell_type_specific	-0.539254	1.54359	-6.89388	2.61701e-10	1.9519e-08	13.1503
cg13810660	chr11	66176168	-	cg13810660	rs61734160	0.029281	NA	NA	NA	NA	chr11:66176034-66176649	Island						11:65932611-65933298	11:66175758-66177101	Unclassified	-0.538993	-1.17583	-6.43488	2.57481e-09	1.34425e-07	10.9357
cg18948380	chr4	113558680	+	cg18948380	NA	NA	NA	NA	NA	NA	chr4:113558032-113558681	Island	LARP7;C4orf21;LARP7;LARP7	NM_016648;NM_018392;NM_015454;NM_015454	5'UTR;TSS1500;5'UTR;1stExon			4:113777482-113778168	4:113557889-113559105	Unclassified	-0.538985	-1.92785	-7.22113	4.93475e-11	4.66137e-09	14.7689
cg26114951	chr3	52188425	+	cg26114951	NA	NA	NA	NA	NA	NA	chr3:52188271-52189037	Island	WDR51A;WDR51A;WDR51A;WDR51A;WDR51A;WDR51A	NM_015426;NM_001161580;NM_015426;NM_001161581;NM_001161581;NM_001161580	5'UTR;1stExon;1stExon;1stExon;5'UTR;5'UTR			3:52163084-52163773	3:52188070-52189309	Promoter_Associated	-0.538739	-1.27929	-7.39748	1.9848e-11	2.11503e-09	15.6532
cg21786114	chr6	31866072	+	cg21786114	NA	NA	NA	NA	NA	NA	chr6:31867691-31867957	N_Shore	EHMT2;EHMT2	NM_006709;NM_025256	TSS1500;TSS1500			6:31972902-31974052	6:31864638-31866513	Promoter_Associated	-0.53864	-1.20494	-9.34324	5.80347e-16	2.39237e-13	25.8102
cg07136949	chr6	7986672	+	cg07136949	NA	NA	NA	NA	NA	NA	chr6:7986333-7986847	Island	MGC26597	NR_027712	Body			6:7931333-7932388			-0.538592	1.25187	-8.33257	1.416e-13	2.85829e-11	20.4589
cg11843188	chr11	102322558	-	cg11843188	NA	NA	NA	NA	NA	NA	chr11:102322529-102323762	Island	TMEM123	NM_052932	Body			11:101827740-101827953	11:102322439-102323212	Promoter_Associated	-0.538143	-2.20306	-8.62675	2.89624e-14	7.1397e-12	22.0034
cg17393016	chr17	79283390	+	cg17393016	NA	NA	NA	NA	NA	NA	chr17:79283863-79284131	N_Shore	C17orf55	NM_178519	TSS1500		TRUE		17:79282128-79283828	Unclassified	-0.538116	1.0552	-3.18417	0.00184505	0.00798859	-1.89692
cg18987274	chr7	132766962	+	cg18987274	NA	NA	NA	NA	NA	NA	chr7:132766509-132767096	Island	CHCHD3	NM_017812	TSS200			7:132417085-132417623	7:132766294-132767393	Promoter_Associated	-0.538101	-2.31813	-8.02466	7.34594e-13	1.20069e-10	18.8573
cg04436255	chr16	56672184	-	cg04436255	NA	NA	NA	NA	NA	NA	chr16:56671937-56672530	Island	MT1A	NM_005946	TSS1500	RDMR		16:55229439-55230097	16:56671813-56672429	Unclassified_Cell_type_specific	-0.53746	-1.28035	-8.03116	7.09614e-13	1.1685e-10	18.891
cg22924838	chr2	200715629	-	cg22924838	NA	NA	NA	NA	NA	NA	chr2:200715388-200716067	Island						2:200423634-200424265	2:200715323-200716432	Promoter_Associated	-0.537404	-1.9092	-7.49062	1.22313e-11	1.39428e-09	16.1235
cg08092446	chr19	58987653	-	cg08092446	NA	NA	NA	NA	NA	NA	chr19:58986853-58988049	Island	ZNF446	NM_017908	TSS200			19:63678610-63679861	19:58986683-58988311	Promoter_Associated	-0.53724	-2.04331	-7.22637	4.80349e-11	4.5651e-09	14.7951
cg05799811	chr1	167487396	+	cg05799811	NA	NA	NA	NA	NA	NA		OpenSea	CD247;CD247	NM_198053;NM_000734	Body;Body			1:165753578-165754116	1:167486693-167488230	Promoter_Associated_Cell_type_specific	-0.537092	0.494825	-6.64318	9.19873e-10	5.66494e-08	11.9322
cg18350866	chr20	39766189	+	cg18350866	NA	NA	NA	NA	NA	NA	chr20:39765229-39766832	Island	PLCG1;PLCG1;PLCG1;PLCG1	NM_002660;NM_002660;NM_182811;NM_182811	1stExon;5'UTR;1stExon;5'UTR			20:39198644-39200209	20:39765409-39766270	Promoter_Associated	-0.536992	-1.81062	-6.2776	5.54655e-09	2.55304e-07	10.1935
cg20034209	chr17	66287369	-	cg20034209	NA	NA	NA	NA	NA	NA	chr17:66286541-66288532	Island	ARSG;SLC16A6;SLC16A6	NM_014960;NM_004694;NM_004694	5'UTR;5'UTR;1stExon	DMR		17:63798868-63800443	17:66287238-66288343	Promoter_Associated	-0.536727	-1.52041	-9.78709	5.03107e-17	2.85206e-14	28.1914
cg22129639	chr15	43785364	+	cg22129639	NA	NA	NA	NA	NA	NA	chr15:43785243-43785490	Island	TP53BP1;TP53BP1;TP53BP1	NM_001141979;NM_001141980;NM_005657	TSS200;TSS200;5'UTR			15:41572260-41572873	15:43784592-43786051	Promoter_Associated	-0.536693	-2.14109	-6.37399	3.46912e-09	1.72436e-07	10.6473
cg05957736	chr3	111579326	+	cg05957736	NA	NA	NA	NA	NA	NA	chr3:111578237-111578739	S_Shore	PHLDB2;PHLDB2;PHLDB2;PHLDB2	NM_145753;NM_001134437;NM_001134438;NM_001134439	5'UTR;Body;5'UTR;5'UTR			3:113061745-113062275	3:111577872-111579756	Unclassified	-0.53657	-2.10475	-5.96657	2.46339e-08	8.80289e-07	8.75347
cg01178899	chr3	45985168	-	cg01178899	NA	NA	NA	NA	NA	NA		OpenSea	CXCR6;FYCO1	NM_006564;NM_024513	5'UTR;Body						-0.536519	1.83931	-6.12105	1.18009e-08	4.78856e-07	9.46394
cg24802351	chr5	139944046	-	cg24802351	NA	NA	NA	NA	NA	NA	chr5:139943835-139944477	Island	APBB3;APBB3;APBB3;SLC35A4;APBB3;APBB3;APBB3;APBB3;APBB3	NM_133172;NM_133173;NM_133173;NM_080670;NM_133174;NM_006051;NM_133174;NM_006051;NM_133172	1stExon;5'UTR;1stExon;TSS1500;1stExon;1stExon;5'UTR;5'UTR;5'UTR			5:139924020-139924861	5:139943273-139945078	Promoter_Associated	-0.536352	-2.09351	-7.08501	9.9123e-11	8.46817e-09	14.092
cg01511126	chr1	40506125	-	cg01511126	NA	NA	NA	NA	NA	NA	chr1:40505411-40506703	Island	CAP1;CAP1	NM_006367;NM_001105530	TSS200;TSS200			1:40277999-40279357	1:40504895-40506832	Promoter_Associated	-0.536171	-1.84884	-9.61119	1.32809e-16	6.70815e-14	27.2462
cg09253211	chr11	63438586	+	cg09253211	NA	NA	NA	NA	NA	NA	chr11:63438301-63439314	Island	ATL3	NM_015459	Body			11:63194878-63195890	11:63437735-63439653	Promoter_Associated	-0.53612	-2.3651	-6.97794	1.70972e-10	1.3561e-08	13.5632
cg03426840	chr11	118661678	-	cg03426840	NA	NA	NA	NA	NA	NA	chr11:118661305-118663026	Island	DDX6	NM_004397	5'UTR			11:118166099-118167443	11:118660768-118662283	Promoter_Associated	-0.535843	-1.72579	-11.0877	3.71601e-20	5.76e-17	35.2103
cg05478631	chr6	166581538	+	cg05478631	NA	NA	NA	NA	NA	NA	chr6:166579973-166583423	Island	T	NM_003181	5'UTR	DMR		6:166499825-166503443			-0.535614	-1.30589	-8.48667	6.17592e-14	1.39854e-11	21.2664
cg18008202	chr2	131100479	-	cg18008202	NA	NA	NA	NA	NA	NA	chr2:131099469-131100863	Island	IMP4;CCDC115	NM_033416;NM_032357	TSS200;TSS1500			2:130816563-130817425	2:131099419-131100856	Promoter_Associated	-0.535571	-2.21723	-7.10301	9.04189e-11	7.8395e-09	14.1812
cg27583010	chr16	30198505	-	cg27583010	NA	NA	NA	NA	NA	NA	chr16:30194747-30195357	S_Shelf	CORO1A;LOC606724	NM_007074;NR_002454	Body;TSS1500	CDMR		16:30105995-30106257	16:30198141-30199180	Promoter_Associated	-0.535297	0.709354	-6.45567	2.32495e-09	1.23468e-07	11.0345
cg17450446	chr1	160002111	-	cg17450446	NA	NA	NA	NA	NA	NA	chr1:160001295-160001989	S_Shore	PIGM	NM_145167	TSS1500				1:160000808-160002352	Promoter_Associated	-0.535264	-1.60004	-9.92586	2.33635e-17	1.48474e-14	28.9383
cg11817993	chr14	92572978	+	cg11817993	NA	NA	NA	NA	NA	NA	chr14:92572554-92573103	Island	ATXN3;ATXN3;ATXN3;ATXN3;ATXN3;ATXN3;ATXN3;ATXN3;ATXN3;ATXN3;ATXN3;ATXN3;ATXN3;ATXN3;ATXN3;ATXN3;ATXN3;ATXN3;ATXN3;ATXN3;ATXN3;ATXN3;ATXN3;ATXN3;ATXN3;ATXN3;ATXN3;ATXN3;ATXN3;ATXN3;ATXN3;ATXN3	NM_001164777;NM_030660;NR_028453;NR_028466;NM_001127697;NR_028469;NR_028468;NM_001127696;NM_001164778;NR_028454;NR_028458;NR_028460;NM_004993;NR_028464;NM_001164776;NR_028465;NR_031765;NM_001164782;NM_001164779;NR_028463;NM_001164780;NM_001164781;NR_028461;NR_028455;NR_028459;NR_028467;NR_028462;NR_028457;NM_001164774;NR_028470;NR_028456;NM_001164775	TSS200;TSS200;TSS200;TSS200;TSS200;TSS200;TSS200;TSS200;TSS200;TSS200;TSS200;TSS200;TSS200;TSS200;TSS200;TSS200;TSS200;TSS200;TSS200;TSS200;TSS200;TSS200;TSS200;TSS200;TSS200;TSS200;TSS200;TSS200;TSS200;TSS200;TSS200;TSS200			14:91642005-91642856	14:92571962-92573974	Promoter_Associated	-0.535138	-0.734592	-6.3414	4.06706e-09	1.96596e-07	10.4935
cg03865041	chr16	71842666	-	cg03865041	NA	NA	NA	NA	NA	NA	chr16:71841923-71843101	Island	AP1G1;AP1G1;AP1G1;AP1G1	NM_001030007;NM_001030007;NM_001128;NM_001128	5'UTR;1stExon;5'UTR;1stExon			16:70399669-70400602	16:71842111-71843779	Promoter_Associated	-0.535098	-1.3862	-8.68388	2.12514e-14	5.51387e-12	22.3047
cg07127945	chr18	45688278	+	cg07127945	NA	NA	NA	NA	NA	NA	chr18:45687797-45688512	Island						18:43941809-43942477	18:45687546-45688744	Unclassified_Cell_type_specific	-0.53456	-1.52337	-6.48149	2.04767e-09	1.11047e-07	11.1574
cg03694868	chr2	62684297	-	cg03694868	rs147710698	0.0142	NA	NA	NA	NA	chr2:62684122-62684552	Island					TRUE	2:62537627-62538160	2:62684003-62685029	Promoter_Associated	-0.53447	-1.96624	-7.36177	2.38819e-11	2.48377e-09	15.4735
cg08438529	chr16	1052939	-	cg08438529	NA	NA	NA	NA	NA	NA	chr16:1056845-1057053	N_Shelf					TRUE	16:992497-993004	16:1052731-1054554	Unclassified_Cell_type_specific	-0.534369	0.964089	-6.63035	9.80502e-10	5.98306e-08	11.8703
cg24052698	chr1	182584193	+	cg24052698	rs680721	0.148587	NA	NA	NA	NA	chr1:182584177-182584545	Island						1:180850602-180851277	1:182584051-182584254	Promoter_Associated	-0.534071	-1.7373	-8.39113	1.03351e-13	2.18106e-11	20.7653
cg04319464	chr6	144385609	+	cg04319464	NA	NA	NA	NA	NA	NA	chr6:144384894-144385888	Island	PLAGL1;PLAGL1;PLAGL1;PLAGL1	NM_001080951;NM_001080951;NM_001080955;NM_001080955	1stExon;5'UTR;1stExon;5'UTR			6:144426506-144427611			-0.534048	-1.95949	-8.43247	8.27253e-14	1.79308e-11	20.9819
cg13476133	chr7	44185646	-	cg13476133	NA	NA	NA	NA	NA	NA	chr7:44184770-44185695	Island	GCK;GCK;GCK	NM_000162;NM_033508;NM_033507	Body;Body;Body	DMR	TRUE	7:44151296-44153080	7:44184506-44186238	Unclassified	-0.53399	-2.26881	-6.20602	7.84197e-09	3.40443e-07	9.85877
cg18450072	chr4	40058936	+	cg18450072	NA	NA	NA	NA	NA	NA	chr4:40057484-40059041	Island	LOC344967;N4BP2	NR_027277;NM_018177	TSS200;5'UTR			4:39733880-39735709			-0.533882	-0.850199	-8.25728	2.12097e-13	4.06452e-11	20.0658
cg19123356	chr8	130898833	-	cg19123356	NA	NA	NA	NA	NA	NA		OpenSea	FAM49B	NM_016623	5'UTR		TRUE				-0.533848	0.667447	-6.43577	2.56359e-09	1.33906e-07	10.9399
cg01027365	chr2	191184571	+	cg01027365	NA	NA	NA	NA	NA	NA	chr2:191184323-191184767	Island	HIBCH;HIBCH	NM_198047;NM_014362	TSS200;TSS200			2:190892569-190893012	2:191183674-191185299	Promoter_Associated	-0.533787	-1.97116	-8.34134	1.35084e-13	2.7439e-11	20.5047
cg25937148	chr3	43147320	+	cg25937148	NA	NA	NA	NA	NA	NA	chr3:43147184-43147713	Island	C3orf39	NM_032806	5'UTR			3:43121866-43122690	3:43146658-43148258	Promoter_Associated	-0.533245	-2.06731	-7.60882	6.59775e-12	8.14661e-10	16.7232
cg03868159	chr6	42532252	-	cg03868159	NA	NA	NA	NA	NA	NA	chr6:42531984-42532292	Island	UBR2	NM_015255	Body			6:42639509-42640363	6:42531235-42533204	Promoter_Associated	-0.53318	-1.8269	-7.5854	7.45819e-12	9.08619e-10	16.6041
cg15136292	chr20	3189993	-	cg15136292	rs6139031	0.165547	NA	NA	NA	NA	chr20:3190011-3190562	N_Shore	ITPA;ITPA	NM_033453;NM_181493	TSS200;TSS200			20:3137993-3138630	20:3189542-3190621	Promoter_Associated	-0.533026	-2.07755	-6.95764	1.89522e-10	1.48087e-08	13.4633
cg09018107	chr1	67798929	-	cg09018107	rs11209051	0.259445	NA	NA	NA	NA		OpenSea	IL12RB2	NM_001559	Body		TRUE		1:67798743-67798938	Unclassified	-0.532949	1.74445	-6.22279	7.232e-09	3.17972e-07	9.93702
cg16656864	chr17	27718261	-	cg16656864	NA	NA	NA	NA	NA	NA	chr17:27717135-27718037	S_Shore	TAOK1	NM_020791	5'UTR						-0.532881	-1.13252	-7.3874	2.09128e-11	2.21167e-09	15.6025
cg26477593	chr11	66610592	-	cg26477593	NA	NA	NA	NA	NA	NA	chr11:66610366-66611267	Island	RCE1;RCE1;C11orf80	NM_005133;NM_001032279;NM_024650	TSS1500;TSS1500;Body			11:66366943-66367832	11:66609889-66611561	Promoter_Associated	-0.532835	-1.71271	-7.08635	9.84491e-11	8.41745e-09	14.0986
cg03590464	chr2	120189318	+	cg03590464	NA	NA	NA	NA	NA	NA	chr2:120189022-120189765	Island	TMEM37	NM_183240	TSS200		TRUE	2:119905374-119906778	2:120189127-120189523	Unclassified	-0.532712	-1.73893	-5.78887	5.67745e-08	1.73915e-06	7.94834
cg09633973	chr17	1957365	-	cg09633973	NA	NA	NA	NA	NA	NA	chr17:1952919-1962328	Island	HIC1	NM_006497	TSS1500			17:1903519-1909615	17:1956840-1957478	Unclassified	-0.532422	-1.30368	-6.41596	2.8251e-09	1.45396e-07	10.846
cg18530251	chr8	22409574	+	cg18530251	NA	NA	NA	NA	NA	NA	chr8:22408672-22409635	Island	SORBS3	NM_005775	5'UTR			8:22464625-22465554			-0.531902	-1.78638	-5.18787	8.64226e-07	1.54055e-05	5.3313
cg14720138	chr17	61851591	-	cg14720138	rs9913551	0.438757	NA	NA	NA	NA	chr17:61850684-61852062	Island	DDX42;DDX42;CCDC47;DDX42;DDX42	NM_203499;NM_007372;NM_020198;NM_203499;NM_007372	1stExon;5'UTR;TSS1500;5'UTR;1stExon			17:59205084-59205843	17:61850722-61851638	Promoter_Associated	-0.531826	-0.771237	-3.18341	0.00184948	0.00800483	-1.89912
cg12448860	chr6	106959601	+	cg12448860	NA	NA	NA	NA	NA	NA	chr6:106959764-106960985	N_Shore	AIM1	NM_001624	TSS200			6:107066242-107067664			-0.531588	-1.7256	-7.63053	5.88879e-12	7.35992e-10	16.8337
cg11105980	chr13	37393381	+	cg11105980	NA	NA	NA	NA	NA	NA	chr13:37393213-37394092	Island	RFXAP;RFXAP	NM_000538;NM_000538	5'UTR;1stExon			13:36291154-36292092	13:37392887-37393611	Promoter_Associated	-0.531565	-0.558135	-9.86199	3.32589e-17	1.99584e-14	28.5945
cg16503057	chr3	49711251	+	cg16503057	NA	NA	NA	NA	NA	NA	chr3:49710968-49712279	Island	APEH	NM_001640	TSS200			3:49686057-49687258	3:49710532-49712457	Promoter_Associated	-0.531372	-1.74338	-6.79501	4.30625e-10	2.97957e-08	12.6675
cg07909759	chr10	118429813	-	cg07909759	NA	NA	NA	NA	NA	NA	chr10:118429430-118429853	Island	C10orf82	NM_144661	TSS1500			10:118419571-118419804			-0.531281	-1.35998	-7.19374	5.68037e-11	5.25461e-09	14.6323
cg06862673	chr17	37617707	-	cg06862673	NA	NA	NA	NA	NA	NA	chr17:37617531-37618045	Island	CDK12;CDK12	NM_016507;NM_015083	TSS200;TSS200			17:34871092-34872842	17:37617384-37618817	Promoter_Associated	-0.531221	-2.10678	-6.13908	1.08228e-08	4.45234e-07	9.5475
cg27089675	chr10	123838499	-	cg27089675	NA	NA	NA	NA	NA	NA		OpenSea	TACC2;TACC2	NM_206862;NM_206861	Body;Body		TRUE		10:123838460-123838685	Unclassified_Cell_type_specific	-0.531141	-1.11661	-10.2697	3.48016e-18	2.85036e-15	30.7922
cg26033526	chr6	32819858	+	cg26033526	rs2071481	0.118152	NA	NA	NA	NA	chr6:32820849-32822370	N_Shore	TAP1	NM_000593	Body						-0.531134	0.30019	-5.2189	7.53957e-07	1.38332e-05	5.46214
cg00985205	chr4	71570491	-	cg00985205	NA	NA	NA	NA	NA	NA	chr4:71570147-71571626	Island	RUFY3	NM_001130709	TSS200			4:71788945-71790601	4:71570226-71570605	Promoter_Associated	-0.530928	-1.47864	-7.93441	1.18639e-12	1.81287e-10	18.3912
cg25442022	chr5	172483751	-	cg25442022	NA	NA	NA	NA	NA	NA	chr5:172483115-172483862	Island	C5orf41;C5orf41;C5orf41	NM_001168394;NM_001168393;NM_153607	5'UTR;5'UTR;5'UTR			5:172415722-172417253			-0.530182	-1.69717	-6.44102	2.49839e-09	1.31038e-07	10.9649
cg26818935	chr16	740532	-	cg26818935	NA	NA	NA	NA	NA	NA	chr16:740007-740578	Island	WDR24	NM_032259	TSS200			16:680038-680574	16:739657-740584	Promoter_Associated	-0.530167	-1.70222	-6.54243	1.51606e-09	8.63516e-08	11.4483
cg18283916	chr15	63797637	-	cg18283916	NA	NA	NA	NA	NA	NA	chr15:63796129-63797638	Island	USP3	NM_006537	Body			15:61582454-61584775			-0.530088	-1.98716	-5.65684	1.04685e-07	2.8616e-06	7.35903
cg13531509	chr10	79793353	-	cg13531509	NA	NA	NA	NA	NA	NA	chr10:79793494-79793952	N_Shore	RPS24;RPS24;RPS24;RPS24;RPS24;RPS24	NM_001142285;NM_001142282;NM_001142284;NM_001026;NM_001142283;NM_033022	TSS200;TSS200;TSS200;TSS200;TSS200;TSS200				10:79793168-79794406	Promoter_Associated	-0.53007	-0.846978	-8.38081	1.09252e-13	2.28095e-11	20.7113
cg06384642	chr7	99613517	+	cg06384642	NA	NA	NA	NA	NA	NA	chr7:99613104-99613797	Island	ZKSCAN1	NM_003439	5'UTR			7:99451058-99451773	7:99612594-99614247	Promoter_Associated	-0.529906	-2.36251	-7.54225	9.3445e-12	1.1077e-09	16.385
cg08924777	chr16	48278166	-	cg08924777	NA	NA	NA	NA	NA	NA	chr16:48278058-48278655	Island	LONP2	NM_031490	TSS200			16:46835567-46836273	16:48277847-48279297	Promoter_Associated	-0.529609	-1.8185	-7.16099	6.71993e-11	6.06793e-09	14.4692
cg01416388	chr22	39784598	-	cg01416388	NA	NA	NA	NA	NA	NA	chr22:39784354-39785104	Island				DMR		22:38114304-38115050	22:39784277-39784735	Promoter_Associated	-0.529603	-1.46861	-7.44772	1.52901e-11	1.68718e-09	15.9066
cg06874399	chr5	79704109	-	cg06874399	NA	NA	NA	NA	NA	NA	chr5:79703436-79704444	Island	ZFYVE16;ZFYVE16	NM_001105251;NM_014733	5'UTR;5'UTR			5:79739101-79740257	5:79703183-79704773	Promoter_Associated	-0.529536	-1.22571	-9.46047	3.04624e-16	1.36565e-13	26.4379
cg15421363	chr5	131826865	-	cg15421363	rs2549008	0.102077	NA	NA	NA	NA	chr5:131825842-131826935	Island	IRF1	NM_002198	TSS1500			5:131853586-131854769	5:131825785-131827504	Promoter_Associated	-0.529407	-1.30279	-7.51899	1.055e-11	1.22931e-09	16.2671
cg00248795	chr1	100731936	-	cg00248795	NA	NA	NA	NA	NA	NA	chr1:100731632-100731999	Island	RTCD1;RTCD1	NM_001130841;NM_003729	1stExon;1stExon			1:100504180-100504891	1:100731203-100732324	Unclassified	-0.529067	-1.87938	-6.57724	1.27616e-09	7.47862e-08	11.6151
cg18463607	chr4	56718320	+	cg18463607	NA	NA	NA	NA	NA	NA	chr4:56719704-56720228	N_Shore	EXOC1;EXOC1;EXOC1	NM_018261;NM_178237;NM_001024924	TSS1500;TSS1500;TSS1500				4:56718196-56718450	Unclassified_Cell_type_specific	-0.529016	1.46288	-5.82536	4.78779e-08	1.51421e-06	8.1126
cg13521018	chr10	134429846	-	cg13521018	NA	NA	NA	NA	NA	NA		OpenSea	INPP5A	NM_005539	Body			10:134279827-134279904	10:134429537-134430334	Unclassified_Cell_type_specific	-0.528947	1.23954	-6.35907	3.73124e-09	1.83081e-07	10.5768
cg22696982	chr2	177502905	-	cg22696982	NA	NA	NA	NA	NA	NA	chr2:177502240-177502910	Island							2:177502669-177503516	Unclassified	-0.528823	-2.06642	-7.8629	1.73263e-12	2.5245e-10	18.0229
cg24111025	chr6	32819921	-	cg24111025	NA	NA	NA	NA	NA	NA	chr6:32820849-32822370	N_Shore	TAP1	NM_000593	Body						-0.528806	2.04826	-6.09533	1.33474e-08	5.30596e-07	9.345
cg08354699	chr15	63796895	+	cg08354699	NA	NA	NA	NA	NA	NA	chr15:63796129-63797638	Island	USP3;USP3	NM_006537;NM_006537	5'UTR;1stExon			15:61582454-61584775	15:63796444-63796995	Promoter_Associated	-0.52817	-1.02115	-8.80708	1.08843e-14	3.08926e-12	22.9561
cg19824334	chr17	73851399	-	cg19824334	NA	NA	NA	NA	NA	NA	chr17:73851260-73852222	Island	WBP2;WBP2	NM_012478;NM_012478	5'UTR;1stExon			17:71362868-71363960	17:73850948-73852656	Promoter_Associated	-0.528128	-2.30064	-6.92916	2.1893e-10	1.67666e-08	13.3234
cg22203628	chr11	69241075	-	cg22203628	rs10796817	0.19296	NA	NA	NA	NA		OpenSea						11:68950234-68950257			-0.528063	0.798553	-6.83551	3.51271e-10	2.50393e-08	12.865
cg06485940	chr4	40859293	+	cg06485940	rs182311557	0.0128	NA	NA	NA	NA	chr4:40858884-40859162	S_Shore	APBB2;APBB2;APBB2;APBB2;APBB2;APBB2;APBB2	NM_004307;NM_001166051;NM_001166053;NM_001166050;NM_001166052;NM_173075;NM_001166054	Body;TSS200;TSS200;Body;TSS200;Body;TSS200		TRUE	4:40553413-40554064	4:40858998-40859469	Unclassified_Cell_type_specific	-0.52789	-1.72217	-9.18491	1.3833e-15	5.10162e-13	24.9645
cg14770570	chr17	73975813	-	cg14770570	rs114063622	0.012598	NA	NA	NA	NA	chr17:73974971-73975731	S_Shore	ACOX1;ACOX1;C17orf106	NM_007292;NM_004035;NM_001113324	TSS1500;TSS1500;5'UTR			17:71486419-71487581	17:73974472-73976123	Promoter_Associated	-0.527548	-1.92109	-7.26351	3.96738e-11	3.86761e-09	14.9807
cg26506725	chr6	31587990	-	cg26506725	NA	NA	NA	NA	NA	NA	chr6:31587779-31589024	Island	BAT2	NM_080686	TSS1500			6:31695777-31696305	6:31587577-31589180	Promoter_Associated	-0.527407	-2.04953	-9.17763	1.43964e-15	5.27697e-13	24.9256
cg17319142	chr2	119916581	+	cg17319142	rs7600045	0.054412	NA	NA	NA	NA	chr2:119914126-119916663	Island	C1QL2	NM_182528	TSS200	DMR		2:119631323-119633133			-0.527218	-1.20375	-7.66428	4.93347e-12	6.2971e-10	17.0057
cg03220945	chr1	205537877	-	cg03220945	rs12024377	0.409506	NA	NA	NA	NA	chr1:205537751-205538443	Island	MFSD4	NM_181644	TSS1500			1:203804406-203805183			-0.526711	-1.43765	-6.95117	1.95833e-10	1.52519e-08	13.4315
cg25835954	chr13	50160062	-	cg25835954	NA	NA	NA	NA	NA	NA	chr13:50159386-50160106	Island	RCBTB1	NM_018191	TSS1500			13:49057058-49058182			-0.526439	-0.761123	-5.92166	3.04576e-08	1.04853e-06	8.54875
cg10459717	chr5	6633577	-	cg10459717	NA	NA	NA	NA	NA	NA	chr5:6632740-6634162	Island	NSUN2;SRD5A1;SRD5A1	NM_017755;NM_001047;NM_001047	TSS1500;5'UTR;1stExon			5:6685483-6687147	5:6632952-6633655	Promoter_Associated	-0.526114	-1.96983	-10.4339	1.40003e-18	1.33964e-15	31.6786
cg25974922	chr19	5660924	-	cg25974922	NA	NA	NA	NA	NA	NA	chr19:5661535-5661863	N_Shore	SAFB	NM_002967	Body						-0.526077	2.07393	-8.59806	3.38302e-14	8.19542e-12	21.8522
cg21502476	chr3	152939561	+	cg21502476	NA	NA	NA	NA	NA	NA		OpenSea					TRUE		3:152939391-152940022	Unclassified_Cell_type_specific	-0.525948	-2.40004	-9.16665	1.52883e-15	5.52674e-13	24.8671
cg12938017	chr7	100813130	+	cg12938017	NA	NA	NA	NA	NA	NA	chr7:100815484-100816995	N_Shelf						7:100599811-100600090	7:100812641-100813704	Unclassified	-0.5258	-2.32109	-4.62441	9.46709e-06	0.00010515	3.04504
cg18159740	chr13	30881703	-	cg18159740	NA	NA	NA	NA	NA	NA	chr13:30880899-30881939	Island	KATNAL1;KATNAL1	NM_032116;NM_001014380	TSS200;TSS1500			13:29778900-29780019	13:30880775-30882124	Promoter_Associated	-0.525538	-1.14188	-7.83786	1.97784e-12	2.83073e-10	17.8942
cg22944662	chr1	178062847	+	cg22944662	rs185853948	0.0133	NA	NA	NA	NA	chr1:178062712-178063846	Island	LOC100302401;RASAL2	NR_027982;NM_170692	Body;TSS200			1:176329297-176330419	1:178062633-178063027	Unclassified_Cell_type_specific	-0.525201	-2.3099	-7.3097	3.12627e-11	3.14814e-09	15.212
cg13014103	chr6	166796984	-	cg13014103	rs183632523	0.022	NA	NA	NA	NA	chr6:166795368-166797301	Island	BRP44L	NM_016098	TSS1500			6:166715394-166717258			-0.524769	-1.97359	-6.95029	1.96711e-10	1.52907e-08	13.4272
cg23195675	chr19	6502304	-	cg23195675	NA	NA	NA	NA	NA	NA	chr19:6502090-6502411	Island	TUBB4;TUBB4	NM_006087;NM_006087	1stExon;5'UTR			19:6452436-6453504	19:6501438-6502875	Unclassified	-0.524455	-1.45852	-6.46975	2.16944e-09	1.1653e-07	11.1015
cg00339488	chr4	155254194	-	cg00339488	NA	NA	NA	NA	NA	NA	chr4:155254130-155254603	Island	DCHS2;DCHS2	NM_017639;NM_001142552	Body;Body	DMR		4:155473376-155474030	4:155254053-155254618	Unclassified	-0.524391	-1.63313	-7.697	4.15469e-12	5.41662e-10	17.1727
cg13787029	chr2	42721631	-	cg13787029	NA	NA	NA	NA	NA	NA	chr2:42719784-42722166	Island	KCNG3;KCNG3	NM_133329;NM_172344	TSS1500;TSS1500			2:42573251-42575665			-0.524219	-1.40614	-9.17715	1.44339e-15	5.28612e-13	24.9231
cg05786840	chr1	228195377	-	cg05786840	NA	NA	NA	NA	NA	NA	chr1:228194096-228196512	Island	WNT3A	NM_033131	Body	CDMR		1:226262000-226263095	1:228195100-228195894	Unclassified_Cell_type_specific	-0.524162	-0.360697	-9.98862	1.65098e-17	1.10963e-14	29.2764
cg19214594	chr22	50629038	+	cg19214594	NA	NA	NA	NA	NA	NA	chr22:50628949-50629249	Island	TRABD	NM_025204	5'UTR		TRUE	22:48971077-48971376	22:50628360-50630309	Promoter_Associated	-0.52413	-1.56101	-8.54377	4.53742e-14	1.06125e-11	21.5664
cg04737950	chr2	71504771	-	cg04737950	NA	NA	NA	NA	NA	NA	chr2:71503547-71504233	S_Shore						2:71358254-71358368	2:71504442-71505134	Unclassified_Cell_type_specific	-0.524078	-1.54005	-5.75923	6.51742e-08	1.95049e-06	7.8154
cg18948877	chr2	242904738	+	cg18948877	rs74003992	0.142596	NA	NA	NA	NA		OpenSea						2:242553411-242553474			-0.523688	2.18573	-3.53225	0.000583606	0.00309047	-0.835112
cg25916307	chr22	29467684	-	cg25916307	NA	NA	NA	NA	NA	NA	chr22:29467291-29467817	Island	KREMEN1;KREMEN1	NM_032045;NM_001039570	TSS1500;TSS1500			22:27797335-27797892	22:29467102-29468177	Unclassified_Cell_type_specific	-0.523613	-1.2766	-7.30208	3.25161e-11	3.2521e-09	15.1739
cg26763877	chr8	4851751	+	cg26763877	rs3860871	0.380516	NA	NA	NA	NA	chr8:4848968-4852635	Island	CSMD1	NM_033225	Body			8:4838530-4840016			-0.523478	-0.884015	-5.70441	8.40428e-08	2.3941e-06	7.57049
cg12218999	chr6	33216249	-	cg12218999	NA	NA	NA	NA	NA	NA	chr6:33216103-33217463	Island						6:33324082-33325607	6:33215783-33217632	Promoter_Associated	-0.52321	-2.09138	-8.08411	5.35256e-13	9.08971e-11	19.1652
cg00692971	chr15	101142510	-	cg00692971	NA	NA	NA	NA	NA	NA	chr15:101141975-101143137	Island	ASB7;LINS1;LINS1;ASB7;LINS1;LINS1	NM_198243;NM_001040616;NM_001040615;NM_024708;NM_001040614;NM_018148	TSS1500;TSS200;TSS200;TSS1500;TSS200;TSS200			15:98959512-98960639	15:101141903-101143739	Promoter_Associated	-0.523046	-2.16462	-7.74337	3.25547e-12	4.38022e-10	17.4098
cg17809276	chr1	172501547	+	cg17809276	NA	NA	NA	NA	NA	NA	chr1:172501910-172502545	N_Shore	C1orf9;C1orf9	NM_016227;NM_014283	TSS1500;TSS1500			1:170767915-170769691	1:172501402-172502836	Promoter_Associated	-0.522614	-1.80065	-8.09435	5.06825e-13	8.69685e-11	19.2183
cg02352716	chr17	1104805	+	cg02352716	NA	NA	NA	NA	NA	NA	chr17:1106812-1107379	N_Shelf						17:1051314-1051631	17:1103972-1104950	Unclassified_Cell_type_specific	-0.522479	1.50648	-7.03362	1.2882e-10	1.06166e-08	13.8378
cg05170515	chr14	24899109	+	cg05170515	NA	NA	NA	NA	NA	NA	chr14:24898779-24899288	Island	CBLN3;KHNYN	NM_001039771;NM_015299	TSS1500;TSS200			14:23968638-23969330	14:24898904-24899401	Promoter_Associated	-0.522217	-1.13042	-10.6358	4.56585e-19	5.07394e-16	32.7693
cg03661616	chr10	112327538	+	cg03661616	NA	NA	NA	NA	NA	NA	chr10:112327072-112327870	Island	SMC3;SMC3	NM_005445;NM_005445	5'UTR;1stExon			10:112317374-112318351	10:112326656-112328452	Promoter_Associated	-0.522096	-0.248873	-6.75079	5.37554e-10	3.59108e-08	12.4526
cg26182254	chr15	57210406	-	cg26182254	NA	NA	NA	NA	NA	NA	chr15:57210226-57212005	Island	LOC145783;TCF12;TCF12;TCF12;TCF12	NR_015419;NM_207037;NM_207036;NM_003205;NM_207038	Body;TSS1500;TSS1500;TSS1500;TSS1500			15:54997519-54999431	15:57209998-57210985	Promoter_Associated	-0.522011	-2.03853	-6.74843	5.43948e-10	3.62572e-08	12.4411
cg15693299	chr12	7916371	+	cg15693299	NA	NA	NA	NA	NA	NA		OpenSea	LOC360030	NM_001145465	TSS1500						-0.521806	1.73328	-6.85067	3.25458e-10	2.34902e-08	12.939
cg05293430	chr3	14444035	-	cg05293430	NA	NA	NA	NA	NA	NA	chr3:14443629-14444577	Island	SLC6A6;SLC6A6;SLC6A6	NM_001134368;NM_003043;NM_001134367	TSS200;TSS200;TSS200			3:14418634-14419581	3:14443222-14445042	Promoter_Associated	-0.521736	-0.0773063	-6.45773	2.3015e-09	1.22361e-07	11.0443
cg04287931	chr4	79697739	-	cg04287931	NA	NA	NA	NA	NA	NA	chr4:79696707-79697958	Island	BMP2K;BMP2K	NM_017593;NM_198892	1stExon;1stExon			4:79915716-79917096			-0.521705	-1.64795	-5.34848	4.24254e-07	8.73339e-06	6.01375
cg24863706	chr4	120549163	+	cg24863706	NA	NA	NA	NA	NA	NA	chr4:120548203-120550250	Island	PDE5A;PDE5A;PDE5A;PDE5A	NM_033430;NM_001083;NM_033437;NM_033437	TSS1500;Body;5'UTR;1stExon			4:120767669-120768905			-0.521453	-1.43671	-8.18286	3.15914e-13	5.77727e-11	19.6782
cg19598832	chr19	1646448	+	cg19598832	NA	NA	NA	NA	NA	NA	chr19:1646117-1646713	Island	TCF3;TCF3	NM_003200;NM_001136139	Body;Body			19:1596333-1597760			-0.521382	2.2258	-6.04382	1.70687e-08	6.49335e-07	9.10756
cg18313106	chr1	229694614	+	cg18313106	NA	NA	NA	NA	NA	NA	chr1:229693772-229695074	Island	ABCB10	NM_012089	TSS200			1:227760336-227761697	1:229694410-229695070	Promoter_Associated	-0.521307	-1.45329	-8.36382	1.19702e-13	2.46846e-11	20.6224
cg18148314	chr1	6425319	+	cg18148314	rs75126985	0.061243	NA	NA	NA	NA		OpenSea	ACOT7;ACOT7	NM_181864;NM_007274	Body;Body				1:6425120-6425391	Unclassified_Cell_type_specific	-0.52097	1.07177	-5.90675	3.26759e-08	1.11123e-06	8.48094
cg24127861	chr14	24640947	+	cg24127861	NA	NA	NA	NA	NA	NA	chr14:24641053-24642220	N_Shore	REC8;REC8	NM_005132;NM_001048205	TSS1500;TSS1500			14:23710662-23712048	14:24640738-24641574	Promoter_Associated	-0.520671	-1.92201	-9.57981	1.57891e-16	7.75722e-14	27.0778
cg25359924	chr5	134240787	-	cg25359924	NA	NA	NA	NA	NA	NA	chr5:134240254-134241314	Island	PCBD2	NM_032151	TSS200			5:134268154-134269065	5:134239962-134241753	Promoter_Associated	-0.520255	-1.27701	-7.3667	2.32808e-11	2.42967e-09	15.4983
cg17786844	chr1	32404291	+	cg17786844	NA	NA	NA	NA	NA	NA	chr1:32403387-32404382	Island	PTP4A2;PTP4A2	NM_080392;NM_080391	TSS1500;TSS1500			1:32175870-32177086	1:32402939-32406060	Promoter_Associated	-0.520163	-1.76394	-9.5462	1.90009e-16	9.101e-14	26.8975
cg09453312	chr5	156608118	-	cg09453312	NA	NA	NA	NA	NA	NA		OpenSea	ITK	NM_005546	1stExon						-0.519905	1.56016	-6.04652	1.68505e-08	6.4244e-07	9.11998
cg21163717	chr8	21769903	+	cg21163717	NA	NA	NA	NA	NA	NA	chr8:21769694-21770080	Island	DOK2	NM_003974	Body			8:21825667-21826026	8:21769040-21770143	Unclassified	-0.519903	1.55534	-5.07452	1.41728e-06	2.28813e-05	4.85754
cg12452946	chr4	128886867	-	cg12452946	NA	NA	NA	NA	NA	NA	chr4:128886004-128886971	Island	MFSD8;C4orf29	NM_152778;NM_001039717	5'UTR;5'UTR			4:129104038-129106590	4:128885879-128887485	Promoter_Associated	-0.519791	-2.05679	-5.349	4.23269e-07	8.71826e-06	6.01598
cg15356195	chr7	5569741	+	cg15356195	NA	NA	NA	NA	NA	NA	chr7:5569062-5570594	Island	ACTB	NM_001101	5'UTR			7:5535220-5537066	7:5568398-5569913	Promoter_Associated	-0.519615	-2.43051	-6.44662	2.4306e-09	1.28152e-07	10.9915
cg21773646	chr17	80085082	+	cg21773646	NA	NA	NA	NA	NA	NA	chr17:80085040-80085333	Island	CCDC57	NM_198082	Body			17:77678040-77678577	17:80084280-80085965	Unclassified_Cell_type_specific	-0.519021	1.43366	-6.16789	9.42371e-09	3.97406e-07	9.68123
cg13181604	chr14	24701136	+	cg13181604	NA	NA	NA	NA	NA	NA	chr14:24701646-24701992	N_Shore	NEDD8;GMPR2;GMPR2;GMPR2;GMPR2	NM_006156;NM_001002000;NM_001002002;NM_016576;NM_001002001	Body;TSS1500;TSS1500;TSS1500;TSS1500			14:23770856-23772297	14:24701091-24702477	Promoter_Associated	-0.518934	-2.13773	-5.94357	2.74647e-08	9.63017e-07	8.64852
cg00906435	chr17	2304368	-	cg00906435	NA	NA	NA	NA	NA	NA	chr17:2302892-2305402	Island	MNT	NM_020310	TSS200			17:2251042-2252477	17:2303791-2305590	Promoter_Associated	-0.518693	-2.09072	-8.31573	1.55004e-13	3.09689e-11	20.3709
cg15518113	chr1	167400121	-	cg15518113	rs1052230	0.17276	NA	NA	NA	NA		OpenSea	CD247;CD247	NM_000734;NM_198053	3'UTR;3'UTR		TRUE		1:167400105-167400470	Unclassified_Cell_type_specific	-0.518555	2.26237	-6.20977	7.70142e-09	3.35208e-07	9.87625
cg11901034	chr3	128598214	+	cg11901034	rs789224	0.452501	NA	NA	NA	NA	chr3:128598176-128598703	Island	ACAD9	NM_014049	TSS200			3:130080669-130081415	3:128597663-128599161	Unclassified	-0.518301	-2.14014	-7.02418	1.35158e-10	1.10694e-08	13.7912
cg18008019	chr13	100641646	-	cg18008019	NA	NA	NA	NA	NA	NA	chr13:100641334-100642188	Island				DMR		13:99439600-99439869			-0.517983	-1.12085	-9.84054	3.74445e-17	2.21041e-14	28.479
cg17386899	chr15	79603965	-	cg17386899	NA	NA	NA	NA	NA	NA	chr15:79603220-79604093	Island	TMED3	NM_007364	Body			15:77389993-77391079	15:79602841-79604165	Promoter_Associated	-0.517851	-1.76947	-8.06337	5.97812e-13	1.00327e-10	19.0577
cg19855366	chr13	111267979	-	cg19855366	NA	NA	NA	NA	NA	NA	chr13:111267780-111268778	Island	CARKD	NM_018210	TSS200			13:110065632-110066753	13:111267453-111269445	Promoter_Associated	-0.51778	-1.49589	-8.80019	1.12999e-14	3.19211e-12	22.9196
cg23586394	chr17	8286572	-	cg23586394	NA	NA	NA	NA	NA	NA	chr17:8286376-8287336	Island	RPL26	NM_000987	TSS200			17:8226819-8228031	17:8285790-8287491	Promoter_Associated	-0.517751	-1.2451	-8.85673	8.30749e-15	2.45234e-12	23.2191
cg26770385	chr8	125486821	-	cg26770385	NA	NA	NA	NA	NA	NA	chr8:125486521-125487622	Island	RNF139	NM_007218	TSS200			8:125555917-125557178	8:125486424-125488912	Promoter_Associated	-0.517699	-2.21213	-7.87277	1.64449e-12	2.40861e-10	18.0737
cg02548780	chr16	22020026	+	cg02548780	NA	NA	NA	NA	NA	NA	chr16:22018987-22020057	Island	C16orf52	NM_001164579	Body			16:21926368-21927541			-0.517699	-1.86857	-7.43804	1.60795e-11	1.76309e-09	15.8577
cg02666008	chr1	110880366	+	cg02666008	NA	NA	NA	NA	NA	NA	chr1:110880394-110880624	N_Shore									-0.517272	-1.47161	-6.54991	1.46101e-09	8.37153e-08	11.4841
cg00124695	chr16	51185039	-	cg00124695	rs114566336	0.039096	NA	NA	NA	NA	chr16:51183699-51188763	Island	SALL1;SALL1	NM_001127892;NM_002968	TSS1500;Body			16:49742460-49742649			-0.517094	-2.32483	-5.25478	6.43517e-07	1.22012e-05	5.61401
cg05989775	chr11	2906934	+	cg05989775	NA	NA	NA	NA	NA	NA	chr11:2905023-2907024	Island	CDKN1C;CDKN1C;CDKN1C;CDKN1C;CDKN1C;CDKN1C	NM_001122630;NM_001122631;NM_001122630;NM_001122631;NM_000076;NM_000076	5'UTR;5'UTR;1stExon;1stExon;1stExon;5'UTR			11:2861614-2864251	11:2906926-2907431	Unclassified	-0.516436	-1.92831	-8.09534	5.04157e-13	8.6546e-11	19.2235
cg22140136	chr19	10491633	-	cg22140136	NA	NA	NA	NA	NA	NA	chr19:10491019-10491720	Island	TYK2	NM_003331	TSS1500			19:10351986-10352720	19:10490482-10491977	Promoter_Associated	-0.516381	-1.70677	-9.49858	2.46984e-16	1.13511e-13	26.6421
cg25833238	chr6	153304325	-	cg25833238	NA	NA	NA	NA	NA	NA	chr6:153303408-153304973	Island	FBXO5;FBXO5	NM_001142522;NM_012177	5'UTR;TSS200			6:153345043-153346666	6:153303844-153305508	Promoter_Associated	-0.516379	-1.82968	-9.45873	3.07558e-16	1.37587e-13	26.4285
cg23679333	chr2	53995338	+	cg23679333	rs2287341	0.284735	NA	NA	NA	NA	chr2:53994891-53995169	S_Shore	LOC100302652;ASB3;ASB3;CHAC2	NM_001164165;NM_145863;NM_016115;NM_001008708	Body;5'UTR;5'UTR;Body			2:53848396-53848942	2:53994240-53995654	Promoter_Associated	-0.516321	-2.00138	-7.8896	1.50428e-12	2.22733e-10	18.1603
cg04739570	chr3	127348611	-	cg04739570	rs75248891	0.101101	NA	NA	NA	NA	chr3:127347682-127348859	Island	PODXL2	NM_015720	Body			3:128830434-128831529	3:127347427-127349188	Promoter_Associated_Cell_type_specific	-0.516158	0.280942	-3.89136	0.000163379	0.00107997	0.352925
cg02327522	chr19	14633030	+	cg02327522	NA	NA	NA	NA	NA	NA	chr19:14628406-14629689	S_Shelf							19:14632847-14633244	Unclassified_Cell_type_specific	-0.515888	2.029	-6.14851	1.03436e-08	4.28725e-07	9.59125
cg26692749	chr1	24861919	+	cg26692749	NA	NA	NA	NA	NA	NA	chr1:24861702-24861920	Island	RCAN3	NM_013441	3'UTR		TRUE		1:24861424-24861999	Promoter_Associated_Cell_type_specific	-0.51554	1.04568	-6.16704	9.46222e-09	3.9867e-07	9.67729
cg06194421	chr17	33570128	-	cg06194421	NA	NA	NA	NA	NA	NA	chr17:33569141-33570527	Island	SLFN5;SLFN5	NM_144975;NM_144975	1stExon;5'UTR			17:30594085-30594640	17:33568968-33570421	Promoter_Associated	-0.515512	-1.67043	-8.01864	7.58501e-13	1.23375e-10	18.8262
cg14977069	chr20	62367698	-	cg14977069	NA	NA	NA	NA	NA	NA	chr20:62368955-62371962	N_Shore	LIME1	NM_017806	TSS1500				20:62367587-62368260	Promoter_Associated	-0.515278	0.735743	-8.99364	3.93802e-15	1.2618e-12	23.9458
cg26816363	chr19	46295874	-	cg26816363	NA	NA	NA	NA	NA	NA	chr19:46295855-46296347	Island	DMWD	NM_004943	1stExon			19:50987397-50988126	19:46295270-46296751	Unclassified	-0.515179	-2.40306	-6.54223	1.51755e-09	8.64244e-08	11.4474
cg23164678	chr6	83775487	-	cg23164678	rs78551616	0.020128	NA	NA	NA	NA	chr6:83775374-83775766	Island	UBE2CBP;UBE2CBP	NM_198920;NM_198920	1stExon;5'UTR			6:83831915-83832473	6:83775115-83776229	Promoter_Associated	-0.515138	-1.34779	-10.8792	1.18253e-19	1.56397e-16	34.084
cg08863422	chr2	232290901	+	cg08863422	NA	NA	NA	NA	NA	NA		OpenSea					TRUE		2:232290571-232291078	Unclassified_Cell_type_specific	-0.515127	2.09955	-3.97813	0.000118621	0.000830476	0.653432
cg19667460	chr15	60863379	+	cg19667460	rs28372148	0.046203	NA	NA	NA	NA		OpenSea	RORA;RORA;RORA;RORA	NM_002943;NM_134261;NM_134262;NM_134260	Body;Body;Body;Body		TRUE				-0.515065	1.46428	-7.16656	6.53064e-11	5.92758e-09	14.4969
cg10708271	chr3	112692897	+	cg10708271	rs73214317	0.029514	NA	NA	NA	NA		OpenSea	CD200R1;CD200R1;CD200R1;CD200R1	NM_138939;NM_138940;NM_138806;NM_170780	Body;Body;Body;Body				3:112692287-112692957	Unclassified	-0.51479	1.65648	-5.74075	7.10163e-08	2.08947e-06	7.7327
cg17931890	chr2	176962423	-	cg17931890	NA	NA	NA	NA	NA	NA	chr2:176962179-176962487	Island					TRUE	2:176670342-176670920	2:176961746-176963009	Unclassified	-0.514634	-1.87341	-6.88054	2.79936e-10	2.06772e-08	13.085
cg12582022	chr3	112738401	+	cg12582022	rs116311120	0.012684	NA	NA	NA	NA	chr3:112738244-112738653	Island	C3orf17;C3orf17;C3orf17	NM_015412;NR_027796;NR_027794	1stExon;Body;Body			3:114220669-114221397	3:112737589-112738876	Promoter_Associated	-0.514631	-2.24674	-7.92878	1.22232e-12	1.85966e-10	18.3621
cg13247663	chr8	59058254	-	cg13247663	NA	NA	NA	NA	NA	NA	chr8:59058167-59059414	Island	FAM110B	NM_147189	5'UTR		TRUE	8:59220722-59222360			-0.514265	-1.39354	-6.86422	3.03956e-10	2.21668e-08	13.0052
cg21767135	chr3	3169141	-	cg21767135	NA	NA	NA	NA	NA	NA	chr3:3168324-3169231	Island	TRNT1	NM_182916	5'UTR			3:3143287-3144231	3:3167925-3169570	Promoter_Associated	-0.513697	-0.628722	-9.08748	2.35811e-15	8.09277e-13	24.4451
cg16371082	chr3	134083158	-	cg16371082	NA	NA	NA	NA	NA	NA	chr3:134082860-134083201	Island	AMOTL2	NM_016201	Body		TRUE	3:135565602-135565887	3:134082780-134084386	Unclassified_Cell_type_specific	-0.51369	-1.72237	-7.49996	1.16506e-11	1.33772e-09	16.1707
cg14705778	chr4	174254825	-	cg14705778	NA	NA	NA	NA	NA	NA	chr4:174254683-174256538	Island	HMGB2;HMGB2;HMGB2;HMGB2	NM_001130689;NM_001130689;NM_002129;NM_001130688	5'UTR;1stExon;5'UTR;5'UTR			4:174491238-174493144			-0.513669	-1.28943	-11.3188	1.03086e-20	1.84425e-17	36.4576
cg02909866	chr10	101152469	-	cg02909866	NA	NA	NA	NA	NA	NA		OpenSea	CNNM1	NM_020348	3'UTR				10:101151838-101152598	Unclassified	-0.51364	-1.81919	-11.057	4.40583e-20	6.68133e-17	35.0446
cg03761649	chr12	8850719	-	cg03761649	rs112263725	0.171468	NA	NA	NA	NA	chr12:8849963-8851403	Island	RIMKLB;RIMKLB	NM_020734;NM_020734	1stExon;5'UTR	DMR		12:8741231-8742633			-0.513487	-2.21126	-5.73355	7.34303e-08	2.14652e-06	7.7005
cg20531781	chr7	99775012	-	cg20531781	NA	NA	NA	NA	NA	NA	chr7:99774733-99775583	Island	STAG3;GPC2	NM_012447;NM_152742	TSS1500;TSS200			7:99612670-99613854	7:99774737-99775599	Promoter_Associated	-0.513417	-1.48771	-8.06727	5.85504e-13	9.8419e-11	19.078
cg04152921	chr16	47495445	-	cg04152921	NA	NA	NA	NA	NA	NA	chr16:47494697-47495207	S_Shore	PHKB;ITFG1;PHKB	NM_000293;NM_030790;NM_001031835	Body;TSS1500;5'UTR			16:46052255-46053137	16:47494788-47495546	Promoter_Associated	-0.51337	-1.62243	-8.11048	4.65037e-13	8.07879e-11	19.302
cg22798362	chr17	30850485	+	cg22798362	NA	NA	NA	NA	NA	NA	chr17:30845903-30846702	S_Shelf	MYO1D	NM_015194	Body				17:30850169-30850621	Unclassified_Cell_type_specific	-0.513296	2.002	-5.723	7.71131e-08	2.23181e-06	7.65337
cg17017152	chr1	61547389	+	cg17017152	NA	NA	NA	NA	NA	NA	chr1:61548753-61549564	N_Shore	NFIA;NFIA;NFIA;NFIA	NM_001145511;NM_005595;NM_001134673;NM_001145512	Body;TSS1500;TSS1500;TSS200			1:61319964-61320110			-0.513257	-1.11826	-7.30053	3.27775e-11	3.27279e-09	15.1661
cg16280132	chr6	31540459	-	cg16280132	rs746868	0.345445	NA	NA	NA	NA		OpenSea	LTA;LTA	NM_001159740;NM_000595	5'UTR;5'UTR				6:31539764-31540869	Promoter_Associated	-0.513175	0.836765	-6.98944	1.61275e-10	1.28868e-08	13.6198
cg03582286	chr4	71571171	-	cg03582286	NA	NA	NA	NA	NA	NA	chr4:71570147-71571626	Island	RUFY3	NM_001130709	Body			4:71788945-71790601	4:71571003-71571618	Promoter_Associated	-0.512982	-1.4329	-9.38614	4.58465e-16	1.93552e-13	26.0398
cg05166508	chr15	83654837	+	cg05166508	NA	NA	NA	NA	NA	NA	chr15:83654590-83655245	Island	FAM103A1	NM_031452	TSS200			15:81445595-81446359	15:83654323-83655587	Promoter_Associated	-0.512688	-1.9528	-7.90359	1.39687e-12	2.08445e-10	18.2324
cg18065318	chr4	140201433	+	cg18065318	NA	NA	NA	NA	NA	NA	chr4:140201064-140201449	Island	C4orf49;C4orf49	NM_032623;NM_032623	5'UTR;1stExon			4:140420515-140421031			-0.512636	0.793873	-7.14215	7.40099e-11	6.58523e-09	14.3755
cg22380472	chr19	2900542	-	cg22380472	rs78002149	0.068618	NA	NA	NA	NA	chr19:2900329-2901203	Island	ZNF57	NM_173480	TSS1500			19:2851365-2852203	19:2900360-2901416	Promoter_Associated	-0.512466	-1.45332	-4.12117	6.92632e-05	0.000533931	1.15982
cg23594951	chr11	2422220	-	cg23594951	NA	NA	NA	NA	NA	NA	chr11:2421040-2422474	Island	TSSC4	NM_005706	TSS1500			11:2377679-2379189			-0.512424	-1.90016	-6.66371	8.30526e-10	5.19833e-08	12.0311
cg05393509	chr6	30294475	+	cg05393509	NA	NA	NA	NA	NA	NA	chr6:30294169-30295071	Island	TRIM39;HCG18;HCG18;TRIM39	NM_021253;NR_024052;NR_024053;NM_172016	TSS200;Body;Body;TSS1500			6:30402149-30403050	6:30294323-30295070	Unclassified	-0.511787	-0.592562	-10.2835	3.22353e-18	2.67078e-15	30.8668
cg26431313	chr3	151987306	+	cg26431313	NA	NA	NA	NA	NA	NA	chr3:151986327-151987325	Island	LOC401093;MBNL1;LOC401093;MBNL1	NR_027038;NM_021038;NR_027037;NM_207292	Body;5'UTR;Body;5'UTR			3:153468888-153470015	3:151985968-151988009	Promoter_Associated	-0.511742	-1.88985	-7.38382	2.13049e-11	2.2469e-09	15.5844
cg19521564	chr4	169239720	+	cg19521564	NA	NA	NA	NA	NA	NA	chr4:169239549-169239824	Island	DDX60	NM_017631	5'UTR			4:169476144-169476577	4:169238610-169240255	Promoter_Associated	-0.511575	-1.89725	-6.8666	3.00338e-10	2.19602e-08	13.0168
cg12457451	chr17	25621979	+	cg12457451	NA	NA	NA	NA	NA	NA	chr17:25620999-25621730	S_Shore	WSB1;WSB1	NM_134265;NM_015626	Body;Body			17:22646096-22646283			-0.511452	-2.25842	-8.54691	4.46112e-14	1.04866e-11	21.5829
cg22094205	chr11	74109076	+	cg22094205	NA	NA	NA	NA	NA	NA	chr11:74108894-74109937	Island	PGM2L1	NM_173582	Body			11:73786543-73787301			-0.510813	-1.86338	-8.5521	4.33753e-14	1.02362e-11	21.6103
cg24356321	chr1	186344702	+	cg24356321	NA	NA	NA	NA	NA	NA	chr1:186344124-186344848	Island	TPR;C1orf27;MIR548F1;C1orf27;C1orf27	NM_003292;NM_017847;NR_031642;NM_001164246;NM_001164245	TSS1500;TSS200;Body;TSS200;TSS200			1:184610542-184611875	1:186344043-186345202	Promoter_Associated	-0.51076	-1.32568	-9.66681	9.77272e-17	5.10593e-14	27.5449
cg22062659	chr8	70747431	+	cg22062659	NA	NA	NA	NA	NA	NA	chr8:70744098-70747441	Island	SLCO5A1	NM_030958	TSS200			8:70908472-70909995			-0.510576	-2.09149	-7.41786	1.78563e-11	1.92922e-09	15.7559
cg25223263	chr11	119020168	-	cg25223263	NA	NA	NA	NA	NA	NA	chr11:119019643-119020887	Island	ABCG4;ABCG4	NM_001142505;NM_022169	TSS200;5'UTR			11:118524863-118526075	11:119019275-119020452	Unclassified_Cell_type_specific	-0.5103	-0.782984	-10.4052	1.64141e-18	1.52544e-15	31.5238
cg03727373	chr11	1404502	-	cg03727373	NA	NA	NA	NA	NA	NA	chr11:1404214-1404711	Island					TRUE	11:1360721-1361287	11:1403216-1405025	Promoter_Associated	-0.510217	-1.71477	-7.81465	2.23576e-12	3.15578e-10	17.775
cg23232416	chr19	53466177	-	cg23232416	NA	NA	NA	NA	NA	NA	chr19:53465730-53466323	Island	ZNF816A	NM_001031665	TSS200			19:58157571-58158224	19:53465668-53466789	Unclassified	-0.510168	-2.08764	-7.53889	9.50944e-12	1.12239e-09	16.368
cg14255062	chr9	123606675	-	cg14255062	NA	NA	NA	NA	NA	NA	chr9:123605043-123605585	S_Shore	PSMD5;LOC253039	NM_005047;NR_024408	TSS1500;Body						-0.510002	1.77941	-5.89806	3.4041e-08	1.14827e-06	8.44147
cg15665928	chr3	138658345	+	cg15665928	NA	NA	NA	NA	NA	NA	chr3:138656627-138659107	Island						3:140141008-140141426			-0.509849	-0.425538	-7.20902	5.2517e-11	4.91106e-09	14.7085
cg05103064	chr10	7311500	-	cg05103064	rs1571177	0.12	NA	NA	NA	NA		OpenSea	SFMBT2	NM_001029880	Body		TRUE		10:7311468-7311608	Unclassified_Cell_type_specific	-0.509823	1.54676	-6.74939	5.41334e-10	3.61288e-08	12.4458
cg26253258	chr20	60697513	+	cg26253258	rs148560014	0.0691	NA	NA	NA	NA	chr20:60696561-60698342	Island	LSM14B	NM_144703	TSS200			20:60129957-60132175	20:60697064-60697633	Promoter_Associated	-0.509805	-1.8618	-6.26711	5.83581e-09	2.66284e-07	10.1444
cg09192942	chr16	75682004	+	cg09192942	NA	NA	NA	NA	NA	NA	chr16:75681264-75682579	Island	KARS;KARS;TERF2IP	NM_001130089;NM_005548;NM_018975	TSS1500;TSS1500;1stExon			16:74238766-74240080	16:75681094-75683072	Promoter_Associated	-0.509691	-1.7051	-7.41884	1.77654e-11	1.92137e-09	15.7609
cg01673307	chr6	32819911	-	cg01673307	rs2071481	0.118152	NA	NA	NA	NA	chr6:32820849-32822370	N_Shore	TAP1	NM_000593	Body						-0.509562	1.91944	-5.91491	3.14438e-08	1.07648e-06	8.51801
cg10822418	chr8	61430157	+	cg10822418	NA	NA	NA	NA	NA	NA	chr8:61429174-61430173	Island	RAB2A	NM_002865	Body			8:61591682-61592858	8:61428915-61430412	Promoter_Associated	-0.509363	-1.82064	-7.80644	2.33473e-12	3.27568e-10	17.7329
cg27008565	chr8	103135208	-	cg27008565	NA	NA	NA	NA	NA	NA	chr8:103135914-103136775	N_Shore	NCALD;NCALD;NCALD;NCALD;NCALD;NCALD;NCALD	NM_001040629;NM_001040624;NM_001040626;NM_001040630;NM_001040628;NM_001040625;NM_001040627	5'UTR;5'UTR;5'UTR;5'UTR;5'UTR;5'UTR;5'UTR	RDMR	TRUE				-0.509143	1.87492	-6.25386	6.22286e-09	2.80292e-07	10.0823
cg25359666	chr3	32544162	-	cg25359666	NA	NA	NA	NA	NA	NA	chr3:32544018-32544325	Island	CMTM6	NM_017801	1stExon			3:32518640-32519401	3:32543230-32544946	Promoter_Associated	-0.50879	-2.14678	-8.07437	5.63775e-13	9.51473e-11	19.1148
cg10495669	chr20	388531	+	cg10495669	NA	NA	NA	NA	NA	NA	chr20:388472-389342	Island	RBCK1;RBCK1	NM_031229;NM_006462	TSS200;TSS200			20:336181-337296	20:387899-388568	Promoter_Associated	-0.5085	-0.0355783	-6.00532	2.04993e-08	7.56414e-07	8.93078
cg00128702	chr18	905156	-	cg00128702	rs1893154	0.242883	NA	NA	NA	NA	chr18:904578-909574	Island	ADCYAP1;ADCYAP1	NM_001099733;NM_001117	5'UTR;TSS200			18:894523-895157			-0.508111	-1.21534	-6.07438	1.47532e-08	5.76283e-07	9.24831
cg02365742	chr5	174151204	-	cg02365742	NA	NA	NA	NA	NA	NA	chr5:174151478-174152364	N_Shore	MSX2	NM_002449	TSS1500				5:174151012-174151637	Unclassified_Cell_type_specific	-0.508107	-1.29276	-7.31331	3.06847e-11	3.10143e-09	15.2302
cg05131957	chr20	5986808	+	cg05131957	NA	NA	NA	NA	NA	NA	chr20:5986399-5987297	Island	CRLS1;CRLS1;CRLS1	NM_019095;NM_019095;NM_001127458	1stExon;5'UTR;TSS1500			20:5934400-5935377	20:5986024-5987319	Promoter_Associated	-0.508049	-2.21314	-7.35973	2.41365e-11	2.50652e-09	15.4632
cg26979339	chr12	107168153	+	cg26979339	NA	NA	NA	NA	NA	NA	chr12:107167762-107168747	Island	RIC8B	NM_018157	TSS1500			12:105691857-105693038	12:107167428-107169230	Promoter_Associated	-0.507965	-1.28675	-8.82068	1.01081e-14	2.89634e-12	23.0281
cg15142819	chr6	158424174	-	cg15142819	NA	NA	NA	NA	NA	NA		OpenSea	SYNJ2	NM_003898	Body		TRUE				-0.507889	1.85971	-6.81196	3.95457e-10	2.77463e-08	12.7501
cg24588482	chr1	160370253	-	cg24588482	NA	NA	NA	NA	NA	NA	chr1:160370112-160370658	Island	VANGL2	NM_020335	TSS200			1:158636464-158637308	1:160369935-160371657	Unclassified	-0.507805	-2.15068	-8.7919	1.18208e-14	3.30153e-12	22.8757
cg05499834	chr8	27472374	-	cg05499834	NA	NA	NA	NA	NA	NA	chr8:27471954-27472523	Island	CLU	NM_001831	TSS200			8:27527768-27528402	8:27471508-27472862	Unclassified	-0.507735	-2.18135	-6.66853	8.10803e-10	5.09711e-08	12.0544
cg18441082	chr5	16466057	-	cg18441082	NA	NA	NA	NA	NA	NA	chr5:16465238-16466460	Island	ZNF622	NM_033414	TSS200			5:16518239-16519460	5:16464986-16466534	Promoter_Associated	-0.507666	-1.1969	-10.1031	8.75935e-18	6.3549e-15	29.8935
cg01136167	chr7	65037704	-	cg01136167	rs4997955	0.351598	NA	NA	NA	NA	chr7:65037624-65037864	Island						7:64675077-64675296			-0.507637	0.292898	-5.24306	6.77738e-07	1.27152e-05	5.56432
cg19489797	chr2	25475140	-	cg19489797	NA	NA	NA	NA	NA	NA	chr2:25474757-25475598	Island	DNMT3A;DNMT3A;DNMT3A;DNMT3A	NM_022552;NM_153759;NM_175629;NM_153759	Body;5'UTR;Body;1stExon			2:25327713-25329102	2:25475072-25475484	Unclassified	-0.507627	-2.19483	-6.30167	4.93458e-09	2.31292e-07	10.3065
cg10729317	chr20	2821390	+	cg10729317	rs2297046	0.067246	NA	NA	NA	NA	chr20:2820509-2821911	Island	FAM113A;VPS16;VPS16;VPS16;VPS16	NM_022760;NM_080413;NM_022575;NM_080413;NM_022575	TSS200;5'UTR;5'UTR;1stExon;1stExon			20:2768510-2769942	20:2821243-2821552	Promoter_Associated	-0.507565	-1.05424	-9.62878	1.20534e-16	6.1671e-14	27.3407
cg25155064	chr11	118100782	+	cg25155064	NA	NA	NA	NA	NA	NA		OpenSea	MPZL3	NM_198275	Body						-0.507418	0.895489	-6.49793	1.88846e-09	1.03804e-07	11.2357
cg18520696	chr17	4631822	-	cg18520696	NA	NA	NA	NA	NA	NA	chr17:4634567-4635230	N_Shelf									-0.507272	2.15789	-5.89457	3.46032e-08	1.16387e-06	8.42567
cg03016153	chr1	117296954	-	cg03016153	NA	NA	NA	NA	NA	NA		OpenSea	CD2	NM_001767	TSS200				1:117296871-117297155	Unclassified_Cell_type_specific	-0.507258	1.86512	-6.63086	9.77989e-10	5.97206e-08	11.8728
cg17477578	chr8	129552914	+	cg17477578	NA	NA	NA	NA	NA	NA		OpenSea					TRUE		8:129552852-129553130	Unclassified_Cell_type_specific	-0.507257	1.38152	-6.24508	6.49305e-09	2.90654e-07	10.0412
cg17697381	chr3	148709363	+	cg17697381	NA	NA	NA	NA	NA	NA	chr3:148709076-148710069	Island	GYG1	NM_004130	TSS200			3:150191727-150192747	3:148708680-148710697	Promoter_Associated	-0.507224	-1.91409	-8.15004	3.76491e-13	6.73266e-11	19.5075
cg26692097	chr16	53738201	-	cg26692097	NA	NA	NA	NA	NA	NA	chr16:53737617-53738235	Island	FTO;RPGRIP1L;RPGRIP1L	NM_001080432;NM_015272;NM_001127897	Body;TSS1500;TSS1500			16:52295243-52295736	16:53737216-53738614	Promoter_Associated	-0.506961	-1.57815	-7.22769	4.7709e-11	4.54132e-09	14.8017
cg19421218	chr3	114012659	-	cg19421218	NA	NA	NA	NA	NA	NA		OpenSea	TIGIT	NM_173799	TSS200						-0.506852	1.75092	-8.25253	2.17562e-13	4.15219e-11	20.041
cg08761102	chr2	38303844	+	cg08761102	NA	NA	NA	NA	NA	NA	chr2:38301276-38304518	Island	CYP1B1	NM_000104	TSS1500			2:38157298-38158106	2:38303390-38304029	Unclassified	-0.506673	-1.72659	-7.26841	3.86845e-11	3.78522e-09	15.0052
cg11384924	chr6	33160224	+	cg11384924	NA	NA	NA	NA	NA	NA	chr6:33159991-33160263	Island	COL11A2;COL11A2;COL11A2;COL11A2;COL11A2;COL11A2;COL11A2;COL11A2	NM_080680;NM_080679;NM_080681;NM_080679;NM_001163771;NM_001163771;NM_080680;NM_080681	5'UTR;5'UTR;1stExon;1stExon;5'UTR;1stExon;1stExon;5'UTR		TRUE	6:33268007-33268477			-0.506569	-0.988526	-9.64414	1.10744e-16	5.70095e-14	27.4232
cg17806882	chr7	150216872	-	cg17806882	rs7783326	0.216981	NA	NA	NA	NA		OpenSea	GIMAP7	NM_153236	5'UTR						-0.505959	2.2478	-5.60001	1.35915e-07	3.53166e-06	7.10777
cg10951305	chr6	31510149	-	cg10951305	rs2239528	0.20815	NA	NA	NA	NA	chr6:31509668-31509896	S_Shore	BAT1;BAT1;SNORD84;BAT1;BAT1	NM_004640;NM_004640;NR_003065;NM_080598;NM_080598	1stExon;5'UTR;TSS1500;1stExon;5'UTR			6:31618039-31618312	6:31508806-31510383	Unclassified	-0.505524	-1.4415	-7.04847	1.19433e-10	9.93852e-09	13.9111
cg18791923	chr2	27994500	-	cg18791923	NA	NA	NA	NA	NA	NA	chr2:27994470-27994944	Island	MRPL33;MRPL33	NM_004891;NM_145330	TSS200;TSS200			2:27847856-27848530	2:27993807-27995317	Promoter_Associated	-0.505421	-2.34038	-7.38239	2.14625e-11	2.26069e-09	15.5773
cg08110692	chr16	552240	+	cg08110692	NA	NA	NA	NA	NA	NA		OpenSea	RAB11FIP3;RAB11FIP3	NM_014700;NM_001142272	Body;Body						-0.505192	2.1836	-7.35797	2.43575e-11	2.52613e-09	15.4544
cg07949612	chr2	69664562	+	cg07949612	NA	NA	NA	NA	NA	NA	chr2:69664291-69664816	Island	NFU1;NFU1;NFU1;NFU1;NFU1;NFU1;NFU1;NFU1	NM_001002756;NM_015700;NM_001002756;NM_015700;NM_001002757;NM_001002757;NM_001002755;NM_001002755	1stExon;1stExon;5'UTR;5'UTR;5'UTR;1stExon;5'UTR;1stExon			2:69517684-69518320	2:69663537-69665399	Promoter_Associated	-0.503824	-1.47138	-9.71763	7.38295e-17	3.97604e-14	27.818
cg23209098	chr14	100149367	+	cg23209098	NA	NA	NA	NA	NA	NA	chr14:100149727-100151073	N_Shore	CYP46A1	NM_006668	TSS1500			14:99218992-99219284	14:100148909-100149958	Promoter_Associated	-0.503791	-2.21993	-6.3843	3.29861e-09	1.65507e-07	10.696
cg15381875	chr5	79783844	+	cg15381875	NA	NA	NA	NA	NA	NA	chr5:79783635-79784145	Island	FAM151B;FAM151B	NM_205548;NM_205548	1stExon;5'UTR			5:79819392-79820177	5:79783536-79784639	Promoter_Associated	-0.503713	-1.58394	-7.57535	7.86054e-12	9.51017e-10	16.553
cg01277369	chr11	568375	+	cg01277369	NA	NA	NA	NA	NA	NA	chr11:567938-569461	Island	MIR210	NR_029623	TSS200			11:557939-559456	11:568077-569440	Promoter_Associated	-0.503628	-1.73017	-6.22971	6.99419e-09	3.09296e-07	9.96934
cg07087156	chr2	228190257	+	cg07087156	NA	NA	NA	NA	NA	NA	chr2:228189836-228190501	Island						2:227898081-227898745	2:228189291-228190842	Promoter_Associated_Cell_type_specific	-0.503576	-1.51946	-6.68469	7.48033e-10	4.76455e-08	12.1325
cg23284646	chr4	17616339	+	cg23284646	NA	NA	NA	NA	NA	NA	chr4:17616175-17616506	Island	MED28	NM_025205	1stExon			4:17225274-17225822	4:17615714-17616936	Promoter_Associated	-0.503057	-1.98553	-9.35704	5.37958e-16	2.23518e-13	25.8841
cg12020201	chr12	50017283	+	cg12020201	NA	NA	NA	NA	NA	NA	chr12:50016973-50017466	Island	PRPF40B	NM_012272	TSS200			12:48303251-48303883	12:50016832-50017656	Promoter_Associated	-0.502702	-1.4788	-7.86779	1.68836e-12	2.46685e-10	18.0481
cg20894640	chr12	19557334	-	cg20894640	NA	NA	NA	NA	NA	NA		OpenSea						12:19448587-19448611			-0.502682	1.78304	-6.5026	1.84542e-09	1.01892e-07	11.258
cg14696926	chr8	2093220	-	cg14696926	rs3407	0.202069	NA	NA	NA	NA		OpenSea	MYOM2	NM_003970	3'UTR			8:2080544-2080644	8:2092890-2094097	Unclassified_Cell_type_specific	-0.502648	1.38656	-5.83545	4.56702e-08	1.45656e-06	8.15811
cg18711535	chr15	64736348	+	cg18711535	rs57400052	0.028767	NA	NA	NA	NA		OpenSea	TRIP4	NM_016213	Body		TRUE				-0.502635	1.79907	-5.88456	3.62725e-08	1.20927e-06	8.38024
cg08003732	chr12	7023752	+	cg08003732	NA	NA	NA	NA	NA	NA	chr12:7023261-7024089	Island	ENO2;ENO2	NM_001975;NM_001975	1stExon;5'UTR			12:6893563-6894581	12:7023192-7024412	Promoter_Associated	-0.502463	-0.512814	-6.48343	2.02823e-09	1.1019e-07	11.1666
cg06796825	chr17	17140633	+	cg06796825	rs116547007	0.02563	NA	NA	NA	NA	chr17:17140117-17141080	Island	FLCN;FLCN	NM_144997;NM_144606	TSS200;TSS200			17:17080809-17081459	17:17139889-17141270	Promoter_Associated	-0.502312	-1.42949	-10.0556	1.13935e-17	8.01673e-15	29.6375
cg23680026	chr4	119200183	+	cg23680026	NA	NA	NA	NA	NA	NA	chr4:119199620-119200193	Island	SNHG8;SNORA24	NR_003584;NR_002963	Body;TSS200			4:119419465-119419723	4:119199402-119200460	Unclassified	-0.502288	-2.09669	-6.82646	3.67649e-10	2.60476e-08	12.8208
cg00841452	chr19	10535506	+	cg00841452	NA	NA	NA	NA	NA	NA	chr19:10535139-10535507	Island	PDE4A	NM_001111307	Body			19:10396140-10396507	19:10534625-10535572	Unclassified	-0.502092	-1.96645	-7.26009	4.03792e-11	3.92635e-09	14.9636
cg06517940	chr1	32717620	+	cg06517940	NA	NA	NA	NA	NA	NA	chr1:32713918-32714186	S_Shelf	LCK	NM_005356	5'UTR						-0.502026	1.51011	-7.76624	2.88605e-12	3.94766e-10	17.5268
cg08031094	chr2	54013912	-	cg08031094	NA	NA	NA	NA	NA	NA	chr2:54013801-54014498	Island	LOC100302652;ASB3;ERLEC1;ASB3;ERLEC1;ERLEC1	NM_001164165;NM_145863;NM_015701;NM_016115;NM_001127397;NM_001127398	Body;5'UTR;TSS200;5'UTR;TSS200;TSS200			2:53867015-53868305	2:54013781-54014328	Promoter_Associated	-0.50168	-1.7467	-8.14836	3.7988e-13	6.77885e-11	19.4988
cg03468541	chr14	89029199	-	cg03468541	NA	NA	NA	NA	NA	NA	chr14:89029178-89029938	Island	ZC3H14;ZC3H14;ZC3H14;ZC3H14;ZC3H14	NM_207660;NM_207661;NM_001160103;NM_001160104;NM_024824	TSS200;TSS1500;TSS200;TSS200;TSS200			14:88098932-88099711	14:89028718-89030191	Promoter_Associated	-0.501502	-0.192292	-12.777	3.29871e-24	1.44341e-20	44.2758
cg23036508	chr3	169483025	+	cg23036508	NA	NA	NA	NA	NA	NA	chr3:169482338-169483052	Island	TERC	NR_001566	TSS200			3:170964884-170965746	3:169481981-169483408	Unclassified	-0.501333	-1.54508	-7.14778	7.19058e-11	6.42661e-09	14.4035
cg10977115	chr11	122709471	-	cg10977115	NA	NA	NA	NA	NA	NA		OpenSea	CRTAM	NM_019604	Body						-0.501221	1.84783	-6.47652	2.09838e-09	1.13458e-07	11.1337
cg10161121	chr1	172628020	+	cg10161121	NA	NA	NA	NA	NA	NA		OpenSea	FASLG	NM_000639	TSS200				1:172627933-172628358	Unclassified_Cell_type_specific	-0.501205	1.39055	-5.94587	2.7168e-08	9.54444e-07	8.659
cg11147586	chr5	170845829	-	cg11147586	NA	NA	NA	NA	NA	NA	chr5:170845760-170848124	Island	FGF18	NM_003862	TSS1500			5:170778348-170780833	5:170845170-170846419	Unclassified	-0.501129	-1.81625	-8.37618	1.12005e-13	2.32917e-11	20.6871
cg12141056	chr1	184944785	+	cg12141056	NA	NA	NA	NA	NA	NA	chr1:184942862-184943777	S_Shore	FAM129A	NM_052966	TSS1500				1:184944716-184945068	Unclassified_Cell_type_specific	-0.50107	1.65702	-6.2472	6.42689e-09	2.88061e-07	10.0511
cg10792864	chr6	32940589	-	cg10792864	rs78280497	0.046203	NA	NA	NA	NA	chr6:32939275-32940954	Island	BRD2;BRD2	NM_001113182;NM_005104	5'UTR;5'UTR			6:33047254-33049087	6:32940276-32941125	Unclassified	-0.500956	-1.80829	-6.8895	2.67555e-10	1.98956e-08	13.1289
cg07746699	chr16	1662305	-	cg07746699	NA	NA	NA	NA	NA	NA	chr16:1660054-1665095	Island	IFT140	NM_014714	TSS200			16:1601905-1603218	16:1661909-1662536	Promoter_Associated	-0.500811	-1.71082	-6.36276	3.66454e-09	1.80378e-07	10.5943
cg07242783	chr1	28052377	-	cg07242783	NA	NA	NA	NA	NA	NA	chr1:28052145-28053002	Island	FAM76A;FAM76A;FAM76A;FAM76A;FAM76A	NM_152660;NM_001143914;NM_001143912;NM_001143915;NM_001143913	TSS200;TSS200;TSS200;TSS200;TSS200			1:27924658-27925693	1:28051600-28053284	Promoter_Associated	-0.500623	-0.990564	-7.14738	7.20535e-11	6.43844e-09	14.4015
cg08701551	chr17	66287507	+	cg08701551	NA	NA	NA	NA	NA	NA	chr17:66286541-66288532	Island	ARSG;SLC16A6	NM_014960;NM_004694	5'UTR;TSS200			17:63798868-63800443	17:66287238-66288343	Promoter_Associated	-0.500559	-1.77446	-6.47596	2.10418e-09	1.13684e-07	11.131
cg14384416	chr2	193393	+	cg14384416	NA	NA	NA	NA	NA	NA		OpenSea						2:183240-183564			-0.500459	2.11452	-7.68461	4.43397e-12	5.73445e-10	17.1095
cg09766628	chr17	4634728	+	cg09766628	rs113073819	0.017591	NA	NA	NA	NA	chr17:4634567-4635230	Island	MED11;MED11	NM_001001683;NM_001001683	5'UTR;1stExon			17:4581350-4581979	17:4634414-4635374	Promoter_Associated	-0.500345	-1.47933	-10.6724	3.72573e-19	4.21845e-16	32.9672
cg17298403	chr19	15218155	-	cg17298403	NA	NA	NA	NA	NA	NA	chr19:15217951-15218617	Island	SYDE1	NM_033025	TSS200	DMR		19:15078952-15079617	19:15217447-15218971	Unclassified_Cell_type_specific	-0.500333	0.126511	-5.98913	2.21364e-08	8.0655e-07	8.85662
cg12838192	chr4	121993196	+	cg12838192	NA	NA	NA	NA	NA	NA	chr4:121992003-121993703	Island	C4orf31;C4orf31	NM_024574;NM_024574	1stExon;5'UTR	DMR	TRUE	4:122212646-122213791	4:121992723-121993941	Unclassified_Cell_type_specific	-0.5003	-1.13161	-8.29973	1.68906e-13	3.34204e-11	20.2873
cg09473725	chr1	167485873	+	cg09473725	NA	NA	NA	NA	NA	NA		OpenSea	CD247;CD247	NM_198053;NM_000734	Body;Body				1:167485866-167486425	Promoter_Associated_Cell_type_specific	-0.500241	1.11454	-6.8828	2.76761e-10	2.04786e-08	13.0961
cg18187726	chr12	69080414	+	cg18187726	NA	NA	NA	NA	NA	NA	chr12:69080580-69081152	N_Shore	NUP107	NM_020401	TSS1500				12:69080220-69081143	Promoter_Associated	-0.499905	-1.2228	-9.50537	2.37929e-16	1.09951e-13	26.6785
cg19482537	chr5	156692823	-	cg19482537	rs74404115	0.012598	NA	NA	NA	NA	chr5:156692812-156693749	Island	CYFIP2;CYFIP2	NM_001037333;NM_001037332	TSS1500;TSS1500			5:156625391-156626314	5:156692359-156693876	Promoter_Associated	-0.499822	-1.70315	-6.73733	5.75034e-10	3.80519e-08	12.3873
cg13886124	chr9	130186480	+	cg13886124	NA	NA	NA	NA	NA	NA	chr9:130186276-130187160	Island	ZNF79	NM_007135	TSS200			9:129226098-129226940	9:130185715-130187435	Promoter_Associated	-0.499819	-1.52716	-8.83288	9.4591e-15	2.74408e-12	23.0927
cg04042333	chr17	1104665	+	cg04042333	rs114172141	0.039531	NA	NA	NA	NA	chr17:1106812-1107379	N_Shelf						17:1051314-1051631	17:1103972-1104950	Unclassified_Cell_type_specific	-0.499572	1.09771	-7.14288	7.37342e-11	6.56348e-09	14.3791
cg19484381	chr6	28890673	+	cg19484381	NA	NA	NA	NA	NA	NA	chr6:28890951-28892013	N_Shore	TRIM27	NM_006510	Body			6:28998597-28998664	6:28890536-28892200	Promoter_Associated	-0.499518	-1.54457	-8.47025	6.74807e-14	1.50698e-11	21.1801
cg24676534	chr5	132201913	+	cg24676534	NA	NA	NA	NA	NA	NA	chr5:132201901-132202753	Island	GDF9;UQCRQ	NM_005260;NM_014402	TSS1500;TSS1500			5:132229688-132230721	5:132201535-132203198	Promoter_Associated	-0.499364	-1.14871	-7.18979	5.79686e-11	5.3412e-09	14.6126
cg12093775	chr13	112548065	-	cg12093775	NA	NA	NA	NA	NA	NA	chr13:112547458-112548130	Island					TRUE	13:111595342-111596108			-0.499066	0.030935	-4.02222	0.000100631	0.000726154	0.808059
cg00255699	chr1	40307257	-	cg00255699	NA	NA	NA	NA	NA	NA		OpenSea	TRIT1	NM_017646	3'UTR						-0.498998	1.20001	-6.30169	4.9342e-09	2.31292e-07	10.3066
cg13627451	chr15	52043674	-	cg13627451	NA	NA	NA	NA	NA	NA	chr15:52043422-52044447	Island	TMOD2;TMOD2;LYSMD2	NM_001142885;NM_014548;NM_001143917	TSS200;TSS200;TSS200			15:49830550-49831727	15:52043360-52044645	Promoter_Associated_Cell_type_specific	-0.498969	-1.11303	-7.94516	1.12065e-12	1.72807e-10	18.4466
cg15164871	chr12	123380523	+	cg15164871	NA	NA	NA	NA	NA	NA	chr12:123380333-123380894	Island	VPS37B	NM_024667	1stExon			12:121946287-121946930	12:123380030-123381368	Promoter_Associated	-0.498521	-1.51921	-6.60022	1.13875e-09	6.80243e-08	11.7254
cg16524049	chr1	165205506	+	cg16524049	NA	NA	NA	NA	NA	NA	chr1:165204501-165205507	Island	LMX1A	NM_177398	Body						-0.49839	-1.1538	-8.02562	7.30841e-13	1.19595e-10	18.8623
cg15194105	chr10	114206675	+	cg15194105	rs2277205	0.087019	NA	NA	NA	NA	chr10:114206604-114207320	Island	ZDHHC6;VTI1A	NM_022494;NM_145206	TSS200;TSS200			10:114196488-114197437	10:114206176-114207494	Promoter_Associated	-0.498222	-2.14951	-6.49873	1.88101e-09	1.03476e-07	11.2395
cg08436942	chr4	4249992	+	cg08436942	NA	NA	NA	NA	NA	NA	chr4:4249766-4250270	Island	TMEM128	NM_032927	TSS200			4:4300620-4301256	4:4248959-4250715	Promoter_Associated	-0.498034	-1.3543	-8.48247	6.31768e-14	1.42373e-11	21.2443
cg21737421	chr18	13267090	+	cg21737421	NA	NA	NA	NA	NA	NA	chr18:13262329-13263271	S_Shelf	C18orf1;C18orf1	NM_181482;NM_181481	5'UTR;5'UTR				18:13266685-13267183	Promoter_Associated_Cell_type_specific	-0.497921	1.9482	-6.03499	1.78023e-08	6.72614e-07	9.06693
cg16021775	chr22	21400059	-	cg16021775	NA	NA	NA	NA	NA	NA	chr22:21399979-21400270	Island	LOC400891	NR_027006	TSS200			22:19729990-19730467	22:21399528-21400423	Unclassified	-0.497765	-1.85387	-6.99939	1.53322e-10	1.23737e-08	13.6688
cg17250947	chr3	42642016	-	cg17250947	NA	NA	NA	NA	NA	NA	chr3:42641844-42642605	Island	NKTR	NM_005385	TSS200			3:42616682-42617889	3:42641593-42642971	Promoter_Associated	-0.497748	-1.24644	-7.85437	1.81252e-12	2.62362e-10	17.9791
cg03289764	chr12	9799858	-	cg03289764	NA	NA	NA	NA	NA	NA	chr12:9800543-9800852	N_Shore	LOC374443	NR_002814	TSS1500				12:9799627-9801479	Promoter_Associated	-0.497659	1.85941	-6.13849	1.08535e-08	4.46278e-07	9.54477
cg14311108	chr9	139377450	+	cg14311108	rs12002854	0.182494	NA	NA	NA	NA	chr9:139377110-139379174	Island	C9orf163;SEC16A;SEC16A	NM_152571;NM_014866;NM_014866	TSS1500;5'UTR;1stExon			9:138496862-138497855			-0.497558	-1.90217	-4.64216	8.80191e-06	9.90349e-05	3.11436
cg07257037	chr12	70132348	-	cg07257037	NA	NA	NA	NA	NA	NA	chr12:70132340-70133559	Island	RAB3IP;RAB3IP;RAB3IP;RAB3IP	NM_175623;NM_022456;NM_175625;NM_175624	TSS1500;TSS1500;TSS1500;TSS1500			12:68418548-68419867	12:70132289-70132706	Promoter_Associated	-0.497435	-1.9532	-7.36603	2.33612e-11	2.43504e-09	15.495
cg26870746	chr6	159463173	+	cg26870746	rs35105682	0.014721	NA	NA	NA	NA		OpenSea	TAGAP;TAGAP;TAGAP	NM_152133;NM_138810;NM_054114	5'UTR;Body;Body						-0.497379	1.80565	-6.12305	1.16884e-08	4.75301e-07	9.47319
cg08575122	chr10	33269417	-	cg08575122	rs60724454	0.203196	NA	NA	NA	NA	chr10:33269511-33269870	N_Shore							10:33269340-33270093	Promoter_Associated_Cell_type_specific	-0.497219	-2.17381	-9.71605	7.44746e-17	4.00565e-14	27.8095
cg07202368	chr2	220462342	-	cg07202368	NA	NA	NA	NA	NA	NA	chr2:220462307-220462944	Island	STK11IP	NM_052902	TSS1500			2:220170567-220171217	2:220461975-220463294	Promoter_Associated	-0.497123	-2.11242	-6.95417	1.92884e-10	1.5049e-08	13.4462
cg05021029	chr10	76947956	-	cg05021029	NA	NA	NA	NA	NA	NA		OpenSea				DMR	TRUE		10:76947330-76948165	Unclassified	-0.497102	1.48783	-6.66135	8.40341e-10	5.25215e-08	12.0197
cg17156767	chr19	30364462	-	cg17156767	rs145926541	0.0659	NA	NA	NA	NA	chr19:30364035-30364803	Island						19:35055604-35056972	19:30364460-30364931	Unclassified	-0.497056	-1.32741	-8.17199	3.34826e-13	6.0729e-11	19.6216
cg10263335	chr15	50646099	-	cg10263335	NA	NA	NA	NA	NA	NA	chr15:50646437-50647742	N_Shore	LOC100129387;GABPB1;GABPB1;FLJ10038;GABPB1;GABPB1;GABPB1	NR_024490;NM_016655;NM_005254;NR_026891;NM_016654;NM_002041;NM_181427	TSS1500;5'UTR;5'UTR;Body;5'UTR;5'UTR;5'UTR						-0.496786	-1.41938	-5.68122	9.35538e-08	2.61184e-06	7.46726
cg26097381	chr6	31779598	-	cg26097381	NA	NA	NA	NA	NA	NA	chr6:31782872-31785190	N_Shelf	HSPA1L	NM_005527	Body						-0.496737	1.44642	-6.7731	4.80683e-10	3.27098e-08	12.561
cg26921846	chr21	30671131	-	cg26921846	NA	NA	NA	NA	NA	NA	chr21:30670744-30671786	Island	BACH1;BACH1	NM_206866;NM_001186	TSS1500;TSS200			21:29592331-29593803	21:30671033-30671345	Promoter_Associated	-0.4965	-2.23101	-8.24362	2.28209e-13	4.32545e-11	19.9945
cg18800771	chr10	103051321	+	cg18800771	NA	NA	NA	NA	NA	NA	chr10:103051128-103052162	Island				DMR	TRUE	10:103041063-103042174	10:103051267-103052680	Unclassified_Cell_type_specific	-0.496446	-0.684125	-6.03	1.82297e-08	6.85676e-07	9.04403
cg20929922	chr5	43484725	-	cg20929922	NA	NA	NA	NA	NA	NA	chr5:43483519-43484555	S_Shore	C5orf28	NM_022483	TSS1500				5:43483412-43485181	Promoter_Associated	-0.496216	-1.14116	-9.25235	9.55755e-16	3.67991e-13	25.3245
cg22479842	chr2	217497949	-	cg22479842	NA	NA	NA	NA	NA	NA	chr2:217497811-217498847	Island	IGFBP2	NM_000597	TSS200			2:217205963-217207411	2:217497928-217498186	Unclassified_Cell_type_specific	-0.496181	-0.930343	-5.84367	4.39458e-08	1.41229e-06	8.19521
cg26234900	chr6	32820214	+	cg26234900	NA	NA	NA	NA	NA	NA	chr6:32820849-32822370	N_Shore	TAP1	NM_000593	Body						-0.495462	1.31258	-5.71254	8.09409e-08	2.32132e-06	7.60671
cg12129796	chr8	79753073	+	cg12129796	NA	NA	NA	NA	NA	NA		OpenSea				DMR					-0.495368	-1.69721	-5.82757	4.7386e-08	1.50114e-06	8.12256
cg17984638	chr4	48136452	-	cg17984638	NA	NA	NA	NA	NA	NA		OpenSea	TXK	NM_003328	TSS200						-0.495171	1.46786	-5.42505	3.00928e-07	6.65837e-06	6.34358
cg11813810	chr1	198621680	-	cg11813810	NA	NA	NA	NA	NA	NA		OpenSea	PTPRC;PTPRC;PTPRC;PTPRC	NM_080922;NM_002838;NM_080923;NM_080921	Body;Body;Body;Body		TRUE				-0.494692	1.86758	-6.00321	2.07063e-08	7.63314e-07	8.92108
cg21432158	chr12	104530941	+	cg21432158	NA	NA	NA	NA	NA	NA	chr12:104531174-104532539	N_Shore	NFYB	NM_006166	5'UTR						-0.494685	-2.06312	-7.80377	2.36782e-12	3.31325e-10	17.7192
cg14491479	chr8	144623711	-	cg14491479	NA	NA	NA	NA	NA	NA	chr8:144623134-144623917	Island	ZC3H3	NM_015117	TSS200			8:144694278-144695248	8:144623139-144624163	Promoter_Associated	-0.494662	-1.47358	-7.40854	1.87412e-11	2.00983e-09	15.709
cg17825156	chr1	67391082	+	cg17825156	NA	NA	NA	NA	NA	NA	chr1:67390468-67391109	Island	MIER1;WDR78;MIER1;MIER1;MIER1;MIER1;MIER1;MIER1;WDR78;MIER1	NM_020948;NM_024763;NM_001077702;NM_001146111;NM_001146113;NM_001077703;NM_001146112;NM_001077700;NM_207014;NM_001146110	5'UTR;TSS1500;5'UTR;5'UTR;5'UTR;Body;5'UTR;Body;TSS1500;5'UTR			1:67162910-67164029	1:67389656-67391637	Promoter_Associated	-0.494582	-0.0562167	-6.16287	9.6538e-09	4.054e-07	9.65793
cg24668570	chr10	134973778	+	cg24668570	NA	NA	NA	NA	NA	NA	chr10:134973510-134974311	Island	KNDC1	NM_152643	TSS200			10:134823310-134824511	10:134973240-134974816	Unclassified_Cell_type_specific	-0.494472	-1.33365	-4.66254	8.09425e-06	9.27067e-05	3.19414
cg05047319	chr11	86748661	-	cg05047319	rs117417096	0.040017	NA	NA	NA	NA	chr11:86748660-86749093	Island	TMEM135;TMEM135;TMEM135	NR_033149;NM_001168724;NM_022918	TSS1500;TSS1500;TSS1500				11:86747915-86749525	Promoter_Associated	-0.494251	-2.1702	-9.48197	2.7063e-16	1.22767e-13	26.5531
cg14291066	chr18	5238200	-	cg14291066	NA	NA	NA	NA	NA	NA	chr18:5237723-5238674	Island	C18orf18;LOC339290	NR_026849;NR_015389	TSS200;Body			18:5227724-5228891	18:5237273-5238951	Promoter_Associated	-0.494244	-2.21844	-7.6201	6.21937e-12	7.73396e-10	16.7806
cg22879676	chr17	81009871	+	cg22879676	rs114114200	0.034752	NA	NA	NA	NA	chr17:81009245-81009999	Island	B3GNTL1	NM_001009905	TSS200			17:78602045-78603405	17:81008952-81010339	Promoter_Associated	-0.49423	-0.927834	-7.83943	1.96149e-12	2.80924e-10	17.9023
cg16328610	chr6	83777335	-	cg16328610	NA	NA	NA	NA	NA	NA	chr6:83777271-83777690	Island	DOPEY1	NM_015018	TSS200			6:83833991-83834706	6:83776787-83778434	Promoter_Associated	-0.49417	-1.64653	-7.65477	5.18595e-12	6.55562e-10	16.9572
cg18406106	chr4	1198308	+	cg18406106	NA	NA	NA	NA	NA	NA		OpenSea	LOC100130872;LOC100130872-SPON2	NR_024569;NR_033182	Body;Body			4:1188278-1188354			-0.49391	2.63047	-3.29431	0.00129353	0.00596574	-1.57081
cg13461622	chr1	25291385	-	cg13461622	NA	NA	NA	NA	NA	NA		OpenSea	RUNX3;RUNX3	NM_001031680;NM_001031680	1stExon;5'UTR			1:25163972-25164333	1:25291322-25292142	Unclassified	-0.493699	1.31919	-6.19863	8.12655e-09	3.50696e-07	9.82432
cg12811871	chr4	2322078	+	cg12811871	NA	NA	NA	NA	NA	NA		OpenSea	ZFYVE28	NM_020972	Body			4:2291712-2291922			-0.493558	1.59529	-7.76065	2.97239e-12	4.05519e-10	17.4982
cg07076751	chr6	30647539	+	cg07076751	NA	NA	NA	NA	NA	NA		OpenSea	KIAA1949;KIAA1949	NM_001134870;NM_133471	Body;Body		TRUE				-0.493459	1.41443	-5.79098	5.6217e-08	1.72496e-06	7.95785
cg11613545	chr5	145826917	-	cg11613545	NA	NA	NA	NA	NA	NA	chr5:145826576-145827430	Island	TCERG1;TCERG1	NM_006706;NM_001040006	1stExon;1stExon			5:145806662-145807588	5:145826264-145827809	Promoter_Associated	-0.493234	-1.51047	-7.31755	3.00191e-11	3.04147e-09	15.2515
cg09623457	chr3	183735666	+	cg09623457	NA	NA	NA	NA	NA	NA	chr3:183735183-183736103	Island	ABCC5;ABCC5;ABCC5;ABCC5	NM_001023587;NM_005688;NM_001023587;NM_005688	1stExon;1stExon;5'UTR;5'UTR			3:185217636-185218866	3:183734664-183736467	Promoter_Associated	-0.493165	-2.0097	-7.19708	5.58374e-11	5.17663e-09	14.649
cg14373410	chr14	81426234	-	cg14373410	NA	NA	NA	NA	NA	NA		OpenSea	TSHR;TSHR;TSHR	NM_001018036;NM_001142626;NM_000369	Body;Body;Body						-0.493161	1.97873	-5.38978	3.5263e-07	7.53445e-06	6.19129
cg18870064	chr10	124768276	+	cg18870064	rs2277250	0.472303	NA	NA	NA	NA	chr10:124767758-124768897	Island	IKZF5;IKZF5;ACADSB	NM_022466;NM_022466;NM_001609	5'UTR;1stExon;TSS200			10:124757720-124759105	10:124768161-124768826	Promoter_Associated	-0.493047	-1.84996	-4.44152	1.98469e-05	0.000191694	2.34185
cg00679763	chr17	46993161	-	cg00679763	NA	NA	NA	NA	NA	NA		OpenSea	UBE2Z	NM_023079	Body		TRUE		17:46992987-46993247	Unclassified_Cell_type_specific	-0.492989	2.23172	-5.87298	3.8301e-08	1.26414e-06	8.32776
cg00137491	chr6	30688801	-	cg00137491	rs57928524	0.057391	NA	NA	NA	NA	chr6:30688624-30689530	Island	TUBB	NM_178014	Body			6:30796546-30796862			-0.492969	-2.05411	-7.5944	7.11494e-12	8.70588e-10	16.6499
cg26461676	chr17	19140887	-	cg26461676	NA	NA	NA	NA	NA	NA	chr17:19140307-19141648	Island	EPN2;EPN2;EPN2	NM_001102664;NM_148921;NM_014964	5'UTR;5'UTR;5'UTR			17:19080840-19082382	17:19140498-19141783	Promoter_Associated_Cell_type_specific	-0.492811	-1.75629	-8.62974	2.84975e-14	7.02922e-12	22.0191
cg03424826	chr18	59561551	+	cg03424826	NA	NA	NA	NA	NA	NA	chr18:59560494-59562016	Island	RNF152	NM_173557	TSS1500			18:57711164-57713384	18:59561520-59561855	Promoter_Associated	-0.492441	-1.09647	-6.5007	1.86279e-09	1.02662e-07	11.249
cg21593669	chr4	25677955	+	cg21593669	NA	NA	NA	NA	NA	NA	chr4:25677808-25678132	Island	SLC34A2	NM_006424	Body			4:25286972-25287280			-0.492314	1.68109	-8.98678	4.08827e-15	1.30101e-12	23.9094
cg21475434	chr5	93447410	-	cg21475434	rs9314100	0.078657	NA	NA	NA	NA	chr5:93446953-93447436	Island	FAM172A;FAM172A;FAM172A;FAM172A	NM_001163418;NR_028080;NM_032042;NM_001163417	TSS200;TSS200;TSS200;TSS200			5:93472710-93473357	5:93446657-93447838	Promoter_Associated	-0.491957	-1.25368	-5.91681	3.11628e-08	1.06844e-06	8.52667
cg01719123	chr8	28244050	+	cg01719123	NA	NA	NA	NA	NA	NA	chr8:28243684-28244283	Island	ZNF395	NM_018660	TSS200			8:28298679-28300226	8:28243682-28244123	Promoter_Associated	-0.491936	-0.922397	-9.81936	4.20939e-17	2.4322e-14	28.3651
cg01636799	chr6	30615000	-	cg01636799	NA	NA	NA	NA	NA	NA	chr6:30614721-30615643	Island	C6orf136;C6orf136;C6orf136;C6orf136;C6orf136;C6orf136	NM_001109938;NM_145029;NM_001161376;NM_001109938;NM_145029;NM_001161376	1stExon;5'UTR;1stExon;5'UTR;1stExon;5'UTR			6:30722713-30723723	6:30614515-30615953	Promoter_Associated	-0.491812	-2.05465	-7.85986	1.76069e-12	2.56006e-10	18.0073
cg03831847	chr16	88832485	-	cg03831847	rs111532330	0.026532	NA	NA	NA	NA		OpenSea	FAM38A	NM_001142864	Body			16:87359943-87360074			-0.491763	2.13032	-6.71547	6.41462e-10	4.18019e-08	12.2814
cg27104117	chr17	27276789	+	cg27104117	NA	NA	NA	NA	NA	NA	chr17:27276219-27278877	Island	PHF12;PHF12	NM_020889;NM_001033561	Body;Body			17:24300707-24303761	17:27275870-27277177	Promoter_Associated	-0.49171	-0.958286	-6.20341	7.9412e-09	3.44111e-07	9.84662
cg19091447	chr20	37555378	+	cg19091447	NA	NA	NA	NA	NA	NA	chr20:37554754-37555835	Island	FAM83D	NM_030919	1stExon			20:36988097-36989232	20:37554382-37556195	Promoter_Associated	-0.491693	-1.47428	-9.26067	9.13153e-16	3.54185e-13	25.3689
cg23123838	chr14	105886072	-	cg23123838	rs79473379	0.02468	NA	NA	NA	NA		OpenSea	MTA1	NM_004689	TSS200			14:104957059-104958204			-0.491655	-1.75533	-7.00343	1.50208e-10	1.21481e-08	13.6887
cg00071250	chr1	172628263	-	cg00071250	NA	NA	NA	NA	NA	NA		OpenSea	FASLG;FASLG	NM_000639;NM_000639	1stExon;5'UTR				1:172627933-172628358	Unclassified_Cell_type_specific	-0.491594	1.03122	-6.13142	1.12281e-08	4.59297e-07	9.51199
cg27497049	chr8	94712646	+	cg27497049	NA	NA	NA	NA	NA	NA	chr8:94712366-94713345	Island	FAM92A1	NM_145269	TSS200			8:94781520-94782544	8:94712280-94713160	Unclassified	-0.491439	-1.66581	-8.75905	1.41311e-14	3.85704e-12	22.7019
cg00661777	chr7	106511741	+	cg00661777	NA	NA	NA	NA	NA	NA	chr7:106508057-106508733	S_Shelf	PIK3CG	NM_002649	Body				7:106511630-106511834	Promoter_Associated	-0.49125	0.762832	-6.30503	4.85465e-09	2.28259e-07	10.3223
cg08796342	chr14	92334029	+	cg08796342	NA	NA	NA	NA	NA	NA		OpenSea	TC2N	NM_001128596	TSS200				14:92333676-92334134	Promoter_Associated_Cell_type_specific	-0.491215	0.831007	-6.50758	1.80066e-09	9.97882e-08	11.2818
cg13457890	chr11	804976	-	cg13457890	NA	NA	NA	NA	NA	NA	chr11:804827-805608	Island	LRDD;LRDD;LRDD	NM_018494;NM_145887;NM_145886	5'UTR;TSS1500;5'UTR			11:794761-795630	11:804578-805749	Promoter_Associated	-0.491202	-1.21579	-6.40973	2.91262e-09	1.49261e-07	10.8164
cg11874976	chr14	101908830	-	cg11874976	NA	NA	NA	NA	NA	NA	chr14:101908781-101909022	Island						14:100978420-100978767	14:101908493-101909270	Unclassified_Cell_type_specific	-0.49092	1.98711	-8.96339	4.64491e-15	1.45392e-12	23.7851
cg05464506	chr2	420052	-	cg05464506	rs116747770	0.027802	NA	NA	NA	NA	chr2:420051-421142	Island									-0.490874	0.798163	-6.47634	2.10022e-09	1.13537e-07	11.1329
cg12483801	chr4	183727862	+	cg12483801	NA	NA	NA	NA	NA	NA	chr4:183727549-183728353	Island				DMR	TRUE	4:183964454-183965039	4:183727130-183728224	Unclassified	-0.490863	-0.896708	-4.37396	2.59629e-05	0.000238964	2.08721
cg23893629	chr1	203733971	+	cg23893629	NA	NA	NA	NA	NA	NA		OpenSea	LAX1;LAX1	NM_017773;NM_001136190	TSS1500;TSS1500				1:203733611-203735088	Promoter_Associated	-0.490829	1.45408	-5.90912	3.23135e-08	1.10123e-06	8.49169
cg11612470	chr12	3068051	-	cg11612470	NA	NA	NA	NA	NA	NA	chr12:3067960-3069444	Island	TEAD4;TEAD4;TEAD4	NM_201443;NM_003213;NM_201441	TSS1500;TSS1500;TSS1500			12:2938178-2940016	12:3067343-3068786	Unclassified	-0.490731	-1.49091	-9.02617	3.29707e-15	1.08202e-12	24.1188
cg10730208	chr12	58290540	+	cg10730208	NA	NA	NA	NA	NA	NA	chr12:58290232-58290466	S_Shore					TRUE	12:56576548-56576823	12:58290126-58290632	Unclassified_Cell_type_specific	-0.490619	-0.796612	-5.12974	1.11465e-06	1.8855e-05	5.08751
cg10481660	chr7	155249746	-	cg10481660	NA	NA	NA	NA	NA	NA	chr7:155246390-155251955	Island	EN2	NM_001427	TSS1500	DMR		7:154942212-154942516	7:155249306-155250577	Unclassified_Cell_type_specific	-0.490596	-1.05103	-8.38346	1.07705e-13	2.25201e-11	20.7251
cg12568633	chr10	73533407	-	cg12568633	NA	NA	NA	NA	NA	NA	chr10:73533091-73533492	Island	CDH23;C10orf54	NM_022124;NM_022153	Body;TSS200			10:73203165-73203498	10:73532778-73534198	Promoter_Associated	-0.490053	-1.76953	-7.30963	3.12742e-11	3.14814e-09	15.2117
cg22415594	chr13	46626866	+	cg22415594	NA	NA	NA	NA	NA	NA	chr13:46626454-46627019	Island	ZC3H13;ZC3H13	NM_015070;NM_015070	5'UTR;1stExon			13:45524839-45525020	13:46626121-46627251	Promoter_Associated	-0.489907	-1.7764	-7.33497	2.74356e-11	2.80748e-09	15.3388
cg06577708	chr3	64008893	-	cg06577708	NA	NA	NA	NA	NA	NA	chr3:64008883-64009293	Island	PSMD6	NM_014814	Body			3:63983659-63984363	3:64008685-64009833	Promoter_Associated	-0.489531	-1.50664	-8.36091	1.21593e-13	2.50202e-11	20.6071
cg10196102	chr6	30434311	-	cg10196102	NA	NA	NA	NA	NA	NA	chr6:30434029-30434422	Island						6:30542017-30542538	6:30433788-30434692	Unclassified	-0.489528	-1.98505	-4.5194	1.45148e-05	0.000148581	2.63882
cg05241839	chr16	53537463	+	cg05241839	NA	NA	NA	NA	NA	NA	chr16:53536501-53537685	Island	AKTIP;AKTIP	NM_001012398;NM_022476	TSS1500;TSS1500			16:52093919-52095243	16:53536897-53537736	Promoter_Associated	-0.489474	-1.92057	-7.11546	8.48415e-11	7.43096e-09	14.243
cg13209388	chr1	6355060	+	cg13209388	rs56235663	0.029592	NA	NA	NA	NA		OpenSea	ACOT7;ACOT7;ACOT7;ACOT7	NM_181864;NM_181865;NM_007274;NM_181866	Body;Body;Body;Body			1:6277579-6277708			-0.489433	1.86895	-6.97638	1.72327e-10	1.36608e-08	13.5555
cg06040872	chr17	34394215	+	cg06040872	NA	NA	NA	NA	NA	NA		OpenSea	CCL18	NM_002988	Body						-0.489202	1.84569	-5.89194	3.50346e-08	1.17543e-06	8.41372
cg12600378	chr5	52405361	-	cg12600378	NA	NA	NA	NA	NA	NA	chr5:52405269-52405767	Island	MOCS2;MOCS2	NM_004531;NM_176806	TSS200;Body			5:52441027-52441650	5:52404659-52406434	Promoter_Associated	-0.489088	-1.08124	-7.54193	9.35974e-12	1.10877e-09	16.3834
cg12375586	chr7	43698429	+	cg12375586	rs6970954	0.429611	NA	NA	NA	NA		OpenSea	C7orf44	NM_018224	5'UTR		TRUE				-0.488803	1.54328	-6.25854	6.08339e-09	2.75149e-07	10.1042
cg11316887	chr10	29924694	-	cg11316887	NA	NA	NA	NA	NA	NA		OpenSea	SVIL;SVIL	NM_021738;NM_003174	TSS1500;5'UTR		TRUE		10:29924573-29925006	Unclassified_Cell_type_specific	-0.488678	1.37788	-5.75802	6.55409e-08	1.95895e-06	7.80999
cg22792644	chr1	6614718	+	cg22792644	rs115199230	0.011729	NA	NA	NA	NA	chr1:6614136-6614835	Island	TAS1R1;TAS1R1;NOL9;TAS1R1;TAS1R1	NM_177541;NM_138697;NM_024654;NM_177540;NM_177539	TSS1500;TSS1500;TSS200;TSS1500;TSS1500			1:6536737-6537388	1:6613929-6615822	Promoter_Associated	-0.488625	-0.932774	-5.34233	4.36078e-07	8.92999e-06	5.98736
cg25765569	chr12	117175636	-	cg25765569	rs73220422	0.017114	NA	NA	NA	NA	chr12:117175623-117176436	Island	C12orf49;RNFT2;RNFT2	NM_024738;NM_001109903;NM_032814	1stExon;TSS1500;TSS1500			12:115660019-115660531	12:117175432-117176690	Promoter_Associated	-0.488551	-0.502723	-6.47088	2.15742e-09	1.16023e-07	11.1069
cg08462194	chr6	33384179	+	cg08462194	NA	NA	NA	NA	NA	NA	chr6:33385678-33386262	N_Shore	PHF1;PHF1;PHF1	NR_027692;NM_002636;NM_024165	Body;3'UTR;3'UTR						-0.48853	1.98001	-5.39426	3.45607e-07	7.41759e-06	6.21062
cg23978242	chr10	530635	+	cg23978242	rs77774741	0.012598	NA	NA	NA	NA	chr10:530713-531099	N_Shore	DIP2C	NM_014974	Body		TRUE		10:530429-530864	Unclassified	-0.488522	0.0442252	-5.40806	3.24831e-07	7.05697e-06	6.27016
cg02934500	chr4	142557404	+	cg02934500	NA	NA	NA	NA	NA	NA	chr4:142557388-142558323	Island	IL15;IL15	NM_172174;NM_000585	TSS1500;TSS1500			4:142776802-142777518	4:142557111-142558569	Promoter_Associated	-0.488458	-1.48346	-7.50278	1.14805e-11	1.31989e-09	16.185
cg26209676	chr19	56154382	+	cg26209676	NA	NA	NA	NA	NA	NA	chr19:56154041-56154405	Island	ZNF581;ZNF580;ZNF580;ZNF580	NM_016535;NM_016202;NM_001163423;NM_207115	TSS1500;1stExon;Body;Body			19:60845663-60846217			-0.488163	-0.108063	-5.91354	3.16471e-08	1.08238e-06	8.51179
cg03855706	chr16	770778	+	cg03855706	NA	NA	NA	NA	NA	NA	chr16:770620-772158	Island	FAM173A	NM_023933	TSS1500			16:710647-712415			-0.48805	-1.52591	-7.41761	1.7879e-11	1.93017e-09	15.7547
cg25429672	chr11	73692155	-	cg25429672	NA	NA	NA	NA	NA	NA	chr11:73693702-73694802	N_Shore	UCP2	NM_003355	5'UTR						-0.487947	1.01124	-6.0899	1.36987e-08	5.42196e-07	9.31992
cg19990785	chr11	67232403	+	cg19990785	NA	NA	NA	NA	NA	NA	chr11:67232298-67232558	Island	TMEM134;TMEM134;TMEM134	NM_025124;NM_001078651;NM_001078650	Body;Body;Body			11:66988454-66989088	11:67231818-67232749	Promoter_Associated	-0.487828	-2.02497	-7.57652	7.81253e-12	9.46026e-10	16.559
cg22512531	chr11	122709551	+	cg22512531	NA	NA	NA	NA	NA	NA		OpenSea	CRTAM	NM_019604	Body						-0.487621	1.57132	-5.48643	2.28056e-07	5.3432e-06	6.61003
cg07474852	chr4	123073612	-	cg07474852	NA	NA	NA	NA	NA	NA	chr4:123073394-123073776	Island						4:123292845-123293614	4:123072954-123073678	Promoter_Associated	-0.487613	-1.74137	-4.12911	6.72e-05	0.000520961	1.18833
cg13137376	chr6	30712221	-	cg13137376	NA	NA	NA	NA	NA	NA	chr6:30710307-30712440	Island	IER3	NM_003897	1stExon			6:30819474-30820419	6:30710361-30712511	Promoter_Associated	-0.487613	-1.64282	-6.66565	8.22505e-10	5.15833e-08	12.0405
cg18731803	chr19	9903129	+	cg18731803	NA	NA	NA	NA	NA	NA	chr19:9903581-9903990	N_Shore						19:9763353-9764990	19:9902232-9904088	Unclassified	-0.487574	0.411947	-6.85314	3.21428e-10	2.3242e-08	12.951
cg02008544	chr8	22926600	+	cg02008544	NA	NA	NA	NA	NA	NA	chr8:22925655-22926912	Island	TNFRSF10B;TNFRSF10B;TNFRSF10B;TNFRSF10B;TNFRSF10B	NM_147187;NM_147187;NM_003842;NR_027140;NM_003842	5'UTR;1stExon;5'UTR;Body;1stExon			8:22981918-22982857	8:22926157-22926872	Promoter_Associated	-0.487227	-2.18507	-10.6795	3.58228e-19	4.08909e-16	33.0054
cg06529459	chr11	67397595	-	cg06529459	NA	NA	NA	NA	NA	NA	chr11:67396844-67398294	Island	NUDT8	NM_181843	TSS200			11:67153074-67155130	11:67395593-67398846	Promoter_Associated	-0.487098	-1.33768	-7.16461	6.59619e-11	5.97804e-09	14.4872
cg04314114	chr16	54318115	+	cg04314114	NA	NA	NA	NA	NA	NA	chr16:54317821-54324604	Island	IRX3	NM_024336	Body	RDMR	TRUE	16:52875131-52878032			-0.486953	-0.905896	-7.43717	1.61519e-11	1.76965e-09	15.8534
cg13617280	chr12	129299462	+	cg13617280	NA	NA	NA	NA	NA	NA		OpenSea	SLC15A4;MGC16384	NM_145648;NR_026666	Body;TSS200			12:127865285-127865458			-0.486662	1.74566	-6.64699	9.02608e-10	5.57824e-08	11.9505
cg23489236	chr5	1536491	-	cg23489236	NA	NA	NA	NA	NA	NA		OpenSea					TRUE		5:1536307-1537577	Promoter_Associated	-0.486517	1.7034	-5.48628	2.28207e-07	5.34614e-06	6.60939
cg04354879	chr17	42634955	-	cg04354879	NA	NA	NA	NA	NA	NA	chr17:42634829-42636851	Island	FZD2;FZD2	NM_001466;NM_001466	1stExon;5'UTR			17:39990069-39992324			-0.486492	-0.51574	-4.27908	3.76914e-05	0.00032438	1.73437
cg27614445	chr3	179041226	-	cg27614445	NA	NA	NA	NA	NA	NA	chr3:179040466-179041632	Island	ZNF639	NM_016331	TSS1500			3:180522961-180524319	3:179039810-179041247	Promoter_Associated	-0.486206	-0.153167	-8.65362	2.50401e-14	6.30225e-12	22.145
cg26384201	chr3	50336345	+	cg26384201	NA	NA	NA	NA	NA	NA	chr3:50336331-50336879	Island	HYAL3;NAT6	NM_003549;NM_012191	5'UTR;Body				3:50335451-50337508	Promoter_Associated	-0.486184	-0.771836	-6.32736	4.35499e-09	2.08523e-07	10.4273
cg23983887	chr1	12509707	+	cg23983887	NA	NA	NA	NA	NA	NA		OpenSea	VPS13D;VPS13D	NM_015378;NM_018156	Body;Body				1:12509265-12509887	Unclassified	-0.486056	0.306413	-7.03114	1.3046e-10	1.07328e-08	13.8255
cg24666276	chr8	128748214	+	cg24666276	NA	NA	NA	NA	NA	NA	chr8:128747805-128751279	Island	MYC	NM_002467	TSS200			8:128816988-128817985			-0.4858	-0.473446	-7.04796	1.19745e-10	9.96249e-09	13.9086
cg00784671	chr22	46762841	+	cg00784671	rs116662684	0.0142	NA	NA	NA	NA	chr22:46762735-46762970	Island	CELSR1	NM_014246	Body			22:45141267-45141617	22:46762649-46764137	Unclassified_Cell_type_specific	-0.485785	1.87831	-4.0762	8.21398e-05	0.000614168	0.99916
cg22963164	chr20	24940490	+	cg22963164	rs1056036	0.320671	NA	NA	NA	NA		OpenSea	CST7	NM_003650	3'UTR						-0.485612	1.79043	-6.87277	2.91137e-10	2.13791e-08	13.047
cg13860281	chr7	55638724	-	cg13860281	NA	NA	NA	NA	NA	NA	chr7:55639277-55640599	N_Shore	VOPP1	NM_030796	Body	CDMR			7:55638609-55638915	Promoter_Associated_Cell_type_specific	-0.485592	1.42486	-5.59229	1.40808e-07	3.63588e-06	7.07374
cg15543284	chr2	54785307	-	cg15543284	NA	NA	NA	NA	NA	NA	chr2:54785026-54785969	Island	SPTBN1;SPTBN1	NM_178313;NM_003128	TSS1500;Body		TRUE	2:54638366-54639473	2:54784567-54786548	Promoter_Associated_Cell_type_specific	-0.485452	-1.88639	-6.88239	2.77337e-10	2.05177e-08	13.0941
cg22150397	chr12	82752718	-	cg22150397	NA	NA	NA	NA	NA	NA	chr12:82752004-82752746	Island	CCDC59;CCDC59;C12orf26	NM_014167;NR_033192;NM_032230	TSS1500;TSS200;Body			12:81276136-81276850	12:82751727-82753413	Promoter_Associated	-0.485419	0.00653255	-4.48142	1.69144e-05	0.000168165	2.49355
cg11236515	chr2	74213762	+	cg11236515	NA	NA	NA	NA	NA	NA	chr2:74211214-74212314	S_Shore						2:74067198-74067278			-0.48531	1.81758	-5.66965	9.86847e-08	2.72864e-06	7.41585
cg14506192	chr12	122711988	+	cg14506192	NA	NA	NA	NA	NA	NA	chr12:122710054-122711371	S_Shore	DIABLO;DIABLO;DIABLO;DIABLO;DIABLO;DIABLO	NR_024600;NM_138929;NM_019887;NR_024601;NM_138929;NM_019887	Body;5'UTR;5'UTR;Body;1stExon;1stExon						-0.485051	1.69427	-6.16533	9.54053e-09	4.01446e-07	9.66933
cg23002097	chr19	58898625	-	cg23002097	NA	NA	NA	NA	NA	NA	chr19:58897721-58898878	Island	RPS5	NM_001009	TSS200			19:63589555-63590991	19:58897314-58898900	Promoter_Associated	-0.484783	-0.951964	-7.06637	1.09017e-10	9.1717e-09	13.9997
cg17616205	chr3	39448961	-	cg17616205	NA	NA	NA	NA	NA	NA	chr3:39447890-39448644	S_Shore	SNORA6;RPSA;RPSA	NR_002325;NM_002295;NM_001012321	TSS1500;5'UTR;TSS200				3:39447652-39449005	Promoter_Associated	-0.48477	-0.262119	-10.036	1.27028e-17	8.76188e-15	29.5316
cg21959598	chr7	55637719	+	cg21959598	NA	NA	NA	NA	NA	NA	chr7:55639277-55640599	N_Shore	VOPP1	NM_030796	Body	CDMR	TRUE		7:55637517-55638235	Unclassified	-0.484765	1.34998	-5.27416	5.9058e-07	1.14076e-05	5.69634
cg27391037	chr22	18560705	-	cg27391037	NA	NA	NA	NA	NA	NA	chr22:18560558-18561410	Island	PEX26;PEX26;PEX26;PEX26	NM_001127649;NM_017929;NM_017929;NM_001127649	1stExon;1stExon;5'UTR;5'UTR			22:16940394-16941410	22:18559989-18562108	Promoter_Associated	-0.484567	-1.41559	-10.1539	6.61272e-18	4.98701e-15	30.1672
cg13777502	chr17	66031814	-	cg13777502	NA	NA	NA	NA	NA	NA	chr17:66031784-66032292	Island	KPNA2	NM_002266	TSS200			17:63461927-63462844	17:66031171-66032664	Promoter_Associated	-0.484395	-1.40799	-8.56349	4.07858e-14	9.70139e-12	21.6702
cg13375187	chr15	39886363	+	cg13375187	NA	NA	NA	NA	NA	NA		OpenSea	THBS1	NM_003246	Body		TRUE		15:39886266-39886472	Unclassified_Cell_type_specific	-0.484371	2.18149	-6.53938	1.53908e-09	8.74255e-08	11.4338
cg19726916	chr19	17420182	+	cg19726916	NA	NA	NA	NA	NA	NA	chr19:17420717-17420939	N_Shore	DDA1	NM_024050	TSS200			19:17281094-17281978	19:17419952-17421049	Promoter_Associated	-0.484277	-2.02008	-8.13156	4.15558e-13	7.32219e-11	19.4115
cg14849855	chr1	67807960	+	cg14849855	NA	NA	NA	NA	NA	NA		OpenSea	IL12RB2	NM_001559	Body		TRUE				-0.484173	1.2295	-7.33571	2.73307e-11	2.79879e-09	15.3426
cg17487170	chr5	133451259	+	cg17487170	NA	NA	NA	NA	NA	NA	chr5:133449320-133451260	Island	TCF7;TCF7;TCF7;TCF7;TCF7;TCF7;TCF7	NM_201632;NM_001134852;NM_001134851;NM_201633;NM_003202;NM_213648;NM_201634	TSS200;TSS1500;TSS1500;TSS200;Body;TSS200;TSS200			5:133477025-133479203	5:133451159-133451312	Promoter_Associated	-0.484073	-0.193849	-9.69177	8.51544e-17	4.51075e-14	27.679
cg04835163	chr1	74663899	-	cg04835163	rs77030123	0.023892	NA	NA	NA	NA	chr1:74663826-74664035	Island	TNNI3K;FPGT;LRRIQ3	NM_001112808;NM_003838;NM_001105659	TSS200;TSS200;TSS200		TRUE	1:74436210-74436650	1:74663148-74664527	Promoter_Associated	-0.483822	-1.85364	-7.10628	8.89173e-11	7.73472e-09	14.1974
cg08140114	chr6	139482238	+	cg08140114	NA	NA	NA	NA	NA	NA		OpenSea	HECA	NM_016217	Body		TRUE		6:139482105-139483443	Promoter_Associated	-0.483785	1.10963	-6.19478	8.27894e-09	3.56393e-07	9.80637
cg23918991	chr4	103749251	-	cg23918991	NA	NA	NA	NA	NA	NA	chr4:103747631-103749392	Island	UBE2D3;UBE2D3;UBE2D3;UBE2D3;UBE2D3;UBE2D3;UBE2D3;UBE2D3;UBE2D3;UBE2D3	NM_181886;NM_003340;NM_181889;NM_181887;NM_181891;NM_181892;NM_181893;NM_181889;NM_181888;NM_181890	TSS200;TSS200;5'UTR;TSS1500;TSS1500;TSS1500;Body;1stExon;TSS200;5'UTR			4:103966711-103968675			-0.483767	-1.83631	-6.681	7.61916e-10	4.84196e-08	12.1146
cg16384496	chr15	60884339	-	cg16384496	NA	NA	NA	NA	NA	NA	chr15:60883298-60885350	Island	RORA;RORA;RORA;RORA	NM_002943;NM_134261;NM_134262;NM_134260	Body;Body;Body;Body	DMR		15:58670532-58672768			-0.483761	-1.42514	-7.97985	9.32187e-13	1.47507e-10	18.6257
cg05278074	chr7	92442568	-	cg05278074	NA	NA	NA	NA	NA	NA		OpenSea	CDK6;CDK6	NM_001259;NM_001145306	Body;Body		TRUE				-0.483647	1.84173	-5.68552	9.17124e-08	2.57125e-06	7.4864
cg00171436	chr12	122985592	-	cg00171436	NA	NA	NA	NA	NA	NA	chr12:122984995-122985644	Island	ZCCHC8	NM_017612	TSS200			12:121550692-121551582	12:122984363-122986184	Promoter_Associated	-0.483335	-1.35394	-7.53484	9.71273e-12	1.14381e-09	16.3475
cg24612198	chr11	118175631	-	cg24612198	NA	NA	NA	NA	NA	NA		OpenSea	CD3E	NM_000733	5'UTR				11:118175120-118176001	Promoter_Associated_Cell_type_specific	-0.4832	2.00398	-5.5214	1.9458e-07	4.71021e-06	6.76264
cg04407228	chr1	1710158	+	cg04407228	NA	NA	NA	NA	NA	NA	chr1:1709394-1710582	Island	NADK	NM_023018	TSS1500			1:1699255-1700442	1:1709168-1711021	Promoter_Associated	-0.483116	-1.93407	-6.68328	7.53306e-10	4.79377e-08	12.1257
cg22186831	chr5	176544048	-	cg22186831	NA	NA	NA	NA	NA	NA	chr5:176543900-176544228	Island					TRUE	5:176476354-176476799	5:176543565-176544350	Unclassified_Cell_type_specific	-0.483083	-1.72712	-3.77142	0.00025232	0.00154584	-0.0539869
cg13603599	chr11	67251939	-	cg13603599	NA	NA	NA	NA	NA	NA	chr11:67250344-67250864	S_Shore	AIP	NM_003977	Body	CDMR			11:67251497-67252257	Promoter_Associated	-0.482964	0.789936	-6.77854	4.67733e-10	3.19476e-08	12.5874
cg23218665	chr1	11159850	+	cg23218665	NA	NA	NA	NA	NA	NA	chr1:11159387-11160136	Island	EXOSC10;EXOSC10	NM_001001998;NM_002685	1stExon;1stExon			1:11081975-11082723	1:11159083-11160495	Promoter_Associated	-0.482855	-1.38669	-8.58473	3.63604e-14	8.76288e-12	21.782
cg13390743	chr18	65183352	-	cg13390743	NA	NA	NA	NA	NA	NA	chr18:65183237-65184014	Island	DSEL	NM_032160	5'UTR	DMR		18:63334218-63335294	18:65183122-65183508	Promoter_Associated_Cell_type_specific	-0.482833	-1.77991	-7.25692	4.10447e-11	3.98553e-09	14.9477
cg10318744	chr14	69282256	+	cg10318744	NA	NA	NA	NA	NA	NA	chr14:69283046-69283605	N_Shore					TRUE		14:69282176-69284638	Promoter_Associated	-0.482827	0.921905	-4.77265	5.12547e-06	6.41258e-05	3.62945
cg00953355	chr17	70114129	+	cg00953355	NA	NA	NA	NA	NA	NA	chr17:70112824-70114271	Island				DMR		17:67624420-67626485			-0.48282	-1.75976	-7.20537	5.35111e-11	4.99513e-09	14.6903
cg03605226	chr16	87637261	-	cg03605226	NA	NA	NA	NA	NA	NA	chr16:87636506-87637284	Island	JPH3	NM_020655	Body	DMR		16:86192682-86195809	16:87636239-87637400	Unclassified	-0.482755	-1.54125	-7.80784	2.31751e-12	3.25477e-10	17.7401
cg02988254	chr2	88991205	-	cg02988254	NA	NA	NA	NA	NA	NA	chr2:88990969-88991587	Island	RPIA;RPIA	NM_144563;NM_144563	1stExon;5'UTR			2:88771819-88772760	2:88990313-88992305	NonGene_Associated	-0.482711	-2.08777	-6.74712	5.47515e-10	3.6466e-08	12.4348
cg12598048	chr15	22892705	+	cg12598048	NA	NA	NA	NA	NA	NA	chr15:22891937-22893998	Island	CYFIP1;CYFIP1	NM_014608;NM_014608	5'UTR;1stExon			15:20443395-20444812			-0.482464	-1.69348	-6.3754	3.44529e-09	1.71515e-07	10.654
cg09755617	chr1	36173937	+	cg09755617	rs80331939	0.010522	NA	NA	NA	NA	chr1:36173406-36173979	Island					TRUE	1:35945586-35946593	1:36172599-36174363	Unclassified_Cell_type_specific	-0.482258	-2.15476	-7.3851	2.1163e-11	2.23362e-09	15.5909
cg07128111	chr5	37840158	-	cg07128111	NA	NA	NA	NA	NA	NA	chr5:37836747-37840726	Island	GDNF	NM_000514	TSS1500			5:37874755-37876520	5:37840121-37840193	Unclassified_Cell_type_specific	-0.482087	-1.30712	-7.09493	9.42284e-11	8.12542e-09	14.1411
cg19109457	chr6	30460484	-	cg19109457	NA	NA	NA	NA	NA	NA	chr6:30457369-30458175	S_Shelf	HLA-E	NM_005516	3'UTR						-0.482076	0.60021	-5.8023	5.33242e-08	1.65298e-06	8.00876
cg23545105	chr4	48908833	+	cg23545105	NA	NA	NA	NA	NA	NA	chr4:48908292-48908850	Island	OCIAD2;OCIAD2	NM_152398;NM_001014446	TSS200;TSS200			4:48603058-48603821	4:48908248-48909217	Promoter_Associated	-0.482041	-1.13037	-6.55142	1.45013e-09	8.31714e-08	11.4914
cg12576082	chr20	30102058	+	cg12576082	NA	NA	NA	NA	NA	NA	chr20:30102057-30102856	Island	HM13;HM13;HM13;HM13	NM_178580;NM_030789;NM_178581;NM_178582	TSS200;TSS200;TSS200;TSS200			20:29565719-29566443	20:30101651-30103097	Promoter_Associated	-0.482004	-2.38094	-5.69976	8.58713e-08	2.43775e-06	7.54976
cg14031065	chr1	247241940	+	cg14031065	NA	NA	NA	NA	NA	NA	chr1:247241579-247242201	Island	ZNF670;ZNF670	NM_033213;NM_033213	5'UTR;1stExon			1:245308203-245308824	1:247241168-247242553	Promoter_Associated	-0.481842	-1.12107	-9.1972	1.29324e-15	4.82456e-13	25.03
cg24551570	chr4	174255085	+	cg24551570	NA	NA	NA	NA	NA	NA	chr4:174254683-174256538	Island	HMGB2;HMGB2;HMGB2	NM_001130689;NM_002129;NM_001130688	TSS200;5'UTR;5'UTR			4:174491238-174493144			-0.481678	-1.44847	-7.7192	3.69697e-12	4.88661e-10	17.2861
cg12976413	chr7	75544151	-	cg12976413	NA	NA	NA	NA	NA	NA	chr7:75543965-75544775	Island	POR	NM_000941	TSS1500			7:75381902-75383006	7:75543820-75545572	Promoter_Associated	-0.481516	-1.59431	-8.60747	3.21505e-14	7.81554e-12	21.9017
cg08856920	chr6	143771642	+	cg08856920	NA	NA	NA	NA	NA	NA	chr6:143771610-143772084	Island	ADAT2;PEX3	NM_182503;NM_003630	Body;TSS1500			6:143813304-143813777	6:143770924-143772694	Promoter_Associated	-0.481249	-1.41405	-7.40955	1.8643e-11	2.00032e-09	15.7141
cg05977109	chr10	52178181	-	cg05977109	NA	NA	NA	NA	NA	NA	chr10:52177724-52178182	Island	SGMS1	NM_147156	5'UTR			10:51847829-51848232	10:52177798-52178567	Promoter_Associated	-0.481023	-2.00996	-6.7104	6.57942e-10	4.271e-08	12.2568
cg24789596	chr2	43038067	-	cg24789596	rs77272774	0.015204	NA	NA	NA	NA	chr2:43037867-43038564	Island						2:42890483-42892320			-0.480765	-2.14885	-7.36101	2.39769e-11	2.49302e-09	15.4697
cg00277591	chr17	4079652	+	cg00277591	NA	NA	NA	NA	NA	NA		OpenSea	ANKFY1	NM_016376	Body		TRUE		17:4079161-4080396	Promoter_Associated_Cell_type_specific	-0.480733	1.17123	-6.34841	3.93048e-09	1.9103e-07	10.5265
cg06715928	chr10	112257500	+	cg06715928	NA	NA	NA	NA	NA	NA	chr10:112257163-112258684	Island	DUSP5	NM_004419	TSS200			10:112247105-112248743	10:112257377-112258385	Promoter_Associated	-0.480556	-1.29086	-6.447	2.42614e-09	1.27983e-07	10.9933
cg03701779	chr10	74927978	-	cg03701779	NA	NA	NA	NA	NA	NA	chr10:74927642-74928063	Island	FAM149B1;ECD;ECD;ECD;ECD;FAM149B1	NM_173348;NM_007265;NM_001135753;NR_024203;NM_001135752;NM_173348	1stExon;TSS200;TSS200;TSS200;TSS200;5'UTR			10:74597679-74598191	10:74927155-74928690	Promoter_Associated	-0.48055	-0.439673	-8.3183	1.52876e-13	3.05944e-11	20.3843
cg07645888	chr2	62932961	-	cg07645888	NA	NA	NA	NA	NA	NA	chr2:62932595-62933353	Island	EHBP1;EHBP1;EHBP1;EHBP1	NM_001142614;NM_001142615;NM_001142616;NM_015252	TSS1500;5'UTR;TSS200;TSS200			2:62786160-62787041	2:62932361-62933092	Promoter_Associated	-0.480512	-1.39638	-6.45882	2.28926e-09	1.21865e-07	11.0495
cg05968188	chr6	16483997	-	cg05968188	NA	NA	NA	NA	NA	NA		OpenSea	ATXN1;ATXN1	NM_001128164;NM_000332	5'UTR;5'UTR		TRUE				-0.48043	1.45891	-5.53751	1.80828e-07	4.44544e-06	6.83313
cg21359303	chr10	106068573	-	cg21359303	NA	NA	NA	NA	NA	NA		OpenSea					TRUE		10:106068200-106068763	Promoter_Associated	-0.479903	1.50161	-5.04188	1.63226e-06	2.5609e-05	4.72239
cg04475877	chr11	2951676	-	cg04475877	NA	NA	NA	NA	NA	NA	chr11:2949788-2951756	Island	PHLDA2	NM_003311	TSS1500			11:2906369-2908332	11:2951655-2952296	Promoter_Associated	-0.479748	-2.10638	-6.67848	7.71557e-10	4.89508e-08	12.1025
cg14001486	chr14	61801201	+	cg14001486	NA	NA	NA	NA	NA	NA		OpenSea	PRKCH	NM_006255	Body		TRUE		14:61801133-61801231	Unclassified_Cell_type_specific	-0.479669	0.839429	-5.68438	9.21958e-08	2.58102e-06	7.48134
cg22949040	chr2	204399512	+	cg22949040	NA	NA	NA	NA	NA	NA	chr2:204399490-204400179	Island	RAPH1;RAPH1	NM_213589;NM_203365	5'UTR;5'UTR			2:204107665-204108850			-0.479594	-2.12482	-6.28975	5.22893e-09	2.4313e-07	10.2505
cg02251850	chr17	78851503	-	cg02251850	rs34613006	0.257299	NA	NA	NA	NA	chr17:78849401-78850933	S_Shore	RPTOR;RPTOR	NM_001163034;NM_020761	Body;Body			17:76465996-76466112	17:78850740-78851628	Promoter_Associated_Cell_type_specific	-0.479582	1.02659	-5.22526	7.33137e-07	1.3528e-05	5.48898
cg17687970	chr8	22462467	-	cg17687970	NA	NA	NA	NA	NA	NA	chr8:22462092-22462868	Island	KIAA1967;KIAA1967	NM_021174;NM_199205	TSS200;5'UTR			8:22518038-22518813	8:22461625-22463338	Promoter_Associated	-0.479479	-0.214863	-5.72433	7.66371e-08	2.22094e-06	7.65933
cg06790069	chr1	40203513	+	cg06790069	rs76136527	0.109332	NA	NA	NA	NA	chr1:40204312-40204739	N_Shore	PPIE;PPIE;PPIE	NM_203457;NM_203456;NM_006112	TSS1500;TSS1500;TSS1500						-0.479316	1.5771	-6.56152	1.37951e-09	7.98183e-08	11.5397
cg23007665	chr7	43690247	+	cg23007665	rs12669280	0.112818	NA	NA	NA	NA		OpenSea	C7orf44	NM_018224	5'UTR		TRUE		7:43689288-43690291	Unclassified	-0.479296	0.791731	-5.65265	1.06724e-07	2.9045e-06	7.34046
cg04543413	chr12	25055676	-	cg04543413	NA	NA	NA	NA	NA	NA	chr12:25055599-25056246	Island	BCAT1	NM_005504	Body	RDMR	TRUE	12:24946708-24947822	12:25055501-25056313	Unclassified	-0.479202	-1.35789	-6.33265	4.2442e-09	2.039e-07	10.4523
cg12500976	chr2	233498078	-	cg12500976	NA	NA	NA	NA	NA	NA	chr2:233497826-233499727	Island	EFHD1;EFHD1	NR_027663;NM_025202	Body;TSS200	DMR		2:233206071-233207315	2:233497979-233499442	Unclassified	-0.478853	-1.36576	-6.69635	7.05751e-10	4.53512e-08	12.1888
cg24011341	chr12	24577904	+	cg24011341	NA	NA	NA	NA	NA	NA		OpenSea	SOX5	NM_152989	5'UTR		TRUE				-0.478662	1.80249	-5.52126	1.94708e-07	4.71222e-06	6.76201
cg05655647	chr12	51157023	+	cg05655647	rs10876082	0.170539	NA	NA	NA	NA	chr12:51157498-51158842	N_Shore	ATF1	NM_005171	TSS1500						-0.478627	0.328134	-5.35115	4.1923e-07	8.65076e-06	6.02519
cg23243902	chr11	117049849	-	cg23243902	NA	NA	NA	NA	NA	NA	chr11:117049399-117050234	Island	SIDT2	NM_001040455	TSS200			11:116554610-116555325			-0.478206	-1.31792	-8.63714	2.73785e-14	6.80918e-12	22.0581
cg09909069	chr13	41860793	-	cg09909069	NA	NA	NA	NA	NA	NA		OpenSea					TRUE		13:41860416-41860940	Unclassified_Cell_type_specific	-0.478142	1.77846	-5.96853	2.44062e-08	8.7379e-07	8.76243
cg08806468	chr10	31593433	-	cg08806468	NA	NA	NA	NA	NA	NA		OpenSea					TRUE				-0.477974	2.05882	-4.87268	3.36515e-06	4.57676e-05	4.03088
cg14145355	chr9	94712780	+	cg14145355	NA	NA	NA	NA	NA	NA	chr9:94711117-94713075	Island	ROR2	NM_004560	TSS1500	DMR		9:93750703-93752875			-0.47787	-1.42933	-5.4388	2.8285e-07	6.34526e-06	6.4031
cg03448396	chr3	38495949	+	cg03448396	NA	NA	NA	NA	NA	NA	chr3:38495088-38497151	Island	LOC100128640;ACVR2B	NR_028389;NM_001106	Body;Body			3:38470093-38472201			-0.477398	-1.52236	-6.97216	1.76062e-10	1.39175e-08	13.5347
cg27659862	chr17	30882177	-	cg27659862	rs225184	0.245309	NA	NA	NA	NA		OpenSea	MYO1D	NM_015194	Body		TRUE				-0.47718	2.00138	-5.19663	8.3161e-07	1.49427e-05	5.36817
cg20039713	chr3	180630700	+	cg20039713	rs73055749	0.0188	NA	NA	NA	NA	chr3:180630152-180630996	Island	FXR1;FXR1;FXR1	NM_001013438;NM_001013439;NM_005087	Body;5'UTR;Body			3:182112847-182113856	3:180629624-180631037	Promoter_Associated	-0.476979	-1.89723	-6.75553	5.24946e-10	3.52225e-08	12.4756
cg16493584	chr6	130544832	-	cg16493584	NA	NA	NA	NA	NA	NA		OpenSea	SAMD3	NM_001017373	TSS1500				6:130544024-130545079	Unclassified	-0.476962	1.91114	-5.4001	3.36665e-07	7.26128e-06	6.23579
cg26797270	chr3	4345077	-	cg26797270	rs172705	0.003119	NA	NA	NA	NA	chr3:4345005-4345342	Island	SETMAR;SETMAR	NM_006515;NR_024022	1stExon;TSS1500			3:4319887-4320646	3:4344354-4345935	Promoter_Associated	-0.476913	-1.06238	-7.62058	6.20386e-12	7.71696e-10	16.783
cg10786221	chr12	72057484	+	cg10786221	NA	NA	NA	NA	NA	NA	chr12:72056768-72057787	Island	THAP2;ZFC3H1;ZFC3H1	NM_031435;NM_144982;NM_144982	TSS1500;5'UTR;1stExon			12:70343036-70344075	12:72056538-72058472	Promoter_Associated	-0.476859	-2.09599	-6.17707	9.01636e-09	3.83035e-07	9.72393
cg08939008	chr1	27152775	+	cg08939008	NA	NA	NA	NA	NA	NA	chr1:27153033-27153243	N_Shore	ZDHHC18	NM_032283	TSS1500				1:27152640-27154215	Promoter_Associated	-0.476573	-1.37921	-7.23863	4.50969e-11	4.32305e-09	14.8563
cg02243437	chr10	61469599	-	cg02243437	NA	NA	NA	NA	NA	NA	chr10:61468610-61469999	Island	SLC16A9;SLC16A9	NM_194298;NM_194298	1stExon;5'UTR		TRUE	10:61138981-61140145	10:61469270-61469660	Unclassified	-0.47651	-0.945819	-10.1081	8.52029e-18	6.20289e-15	29.9205
cg02478956	chr15	22833681	-	cg02478956	NA	NA	NA	NA	NA	NA	chr15:22833282-22833911	Island	TUBGCP5;TUBGCP5	NM_001102610;NM_052903	Body;Body			15:20384590-20385343	15:22832804-22834244	Promoter_Associated	-0.476504	-1.62459	-4.46975	1.7726e-05	0.000174757	2.44907
cg16552437	chr5	139554476	-	cg16552437	NA	NA	NA	NA	NA	NA	chr5:139554389-139555457	Island	C5orf32	NM_032412	TSS200			5:139534634-139535624	5:139554047-139556021	Promoter_Associated	-0.476435	-1.28418	-7.31337	3.06752e-11	3.10143e-09	15.2305
cg12870750	chr17	7791882	+	cg12870750	NA	NA	NA	NA	NA	NA	chr17:7788261-7789091	S_Shelf	CHD3;CHD3;CHD3	NM_001005271;NM_005852;NM_001005273	Body;TSS1500;TSS1500	RDMR	TRUE		17:7791365-7793314	Promoter_Associated	-0.476264	-1.20787	-7.61271	6.46485e-12	7.99662e-10	16.743
cg13152690	chr14	91695017	+	cg13152690	NA	NA	NA	NA	NA	NA		OpenSea					TRUE		14:91694811-91695512	Unclassified	-0.476222	0.933174	-5.66103	1.02683e-07	2.81822e-06	7.37762
cg02525705	chr6	32145146	+	cg02525705	NA	NA	NA	NA	NA	NA		OpenSea	RNF5P1;RNF5;AGPAT1;AGPAT1	NR_003129;NM_006913;NM_006411;NM_032741	TSS1500;TSS1500;TSS1500;5'UTR						-0.476209	-1.60833	-4.60521	1.0241e-05	0.000112019	2.9703
cg08827322	chr6	28921485	+	cg08827322	NA	NA	NA	NA	NA	NA		OpenSea						6:29029267-29029479	6:28921467-28921935	Unclassified_Cell_type_specific	-0.476142	-0.916517	-6.65982	8.46777e-10	5.28451e-08	12.0124
cg07047920	chr16	2802315	+	cg07047920	NA	NA	NA	NA	NA	NA	chr16:2801913-2803409	Island	SRRM2;LOC100128788	NM_016333;NR_027275	TSS200;Body			16:2741915-2743434	16:2802280-2803162	NonGene_Associated	-0.475825	-1.89331	-4.68478	7.38442e-06	8.60413e-05	3.28152
cg09184502	chr6	106958474	+	cg09184502	rs6929949	0.29359	NA	NA	NA	NA	chr6:106958232-106958718	Island	AIM1	NM_001624	TSS1500			6:107064791-107065435	6:106958247-106958936	Unclassified_Cell_type_specific	-0.475724	-1.99491	-7.12246	8.18584e-11	7.1997e-09	14.2777
cg08742502	chr6	106546754	+	cg08742502	NA	NA	NA	NA	NA	NA		OpenSea	PRDM1;PRDM1	NM_001198;NM_182907	Body;TSS200		TRUE	6:106653394-106653448	6:106546552-106546871	Promoter_Associated_Cell_type_specific	-0.475717	0.830498	-5.25038	6.56149e-07	1.23932e-05	5.59537
cg07046399	chr14	105940820	-	cg07046399	NA	NA	NA	NA	NA	NA	chr14:105940325-105941900	Island	CRIP2	NM_001312	TSS1500			14:105011371-105013100			-0.475539	-1.70009	-4.97386	2.18714e-06	3.2423e-05	4.44253
cg12216435	chr3	128995479	-	cg12216435	NA	NA	NA	NA	NA	NA	chr3:128997382-128997600	N_Shore	COPG	NM_016128	Body				3:128995331-128995617	Gene_Associated_Cell_type_specific	-0.47506	0.170718	-7.39138	2.0486e-11	2.17499e-09	15.6225
cg20482390	chr20	62183924	+	cg20482390	rs116012393	0.0884	NA	NA	NA	NA	chr20:62185073-62185572	N_Shore	C20orf195	NM_024059	TSS1500						-0.474865	0.52088	-6.34832	3.93217e-09	1.91087e-07	10.5261
cg01525244	chr22	39548611	+	cg01525244	rs150296091	0.0646	NA	NA	NA	NA	chr22:39548613-39549666	N_Shore	CBX7	NM_175709	TSS200			22:37877959-37879580	22:39548135-39549801	Promoter_Associated	-0.474715	-1.07289	-11.5484	2.8862e-21	5.85695e-18	37.6955
cg14665366	chr4	90227740	+	cg14665366	NA	NA	NA	NA	NA	NA	chr4:90228714-90229010	N_Shore	GPRIN3	NM_198281	5'UTR	RDMR					-0.474683	1.51686	-5.10154	1.26037e-06	2.0844e-05	4.96986
cg22554796	chr10	32345272	-	cg22554796	NA	NA	NA	NA	NA	NA	chr10:32344550-32345570	Island	KIF5B;KIF5B	NM_004521;NM_004521	5'UTR;1stExon			10:32384485-32385576	10:32344303-32345956	Promoter_Associated	-0.474636	-1.89602	-7.11429	8.53518e-11	7.47098e-09	14.2371
cg24806732	chr17	7608859	-	cg24806732	NA	NA	NA	NA	NA	NA	chr17:7608376-7608956	Island	EFNB3;EFNB3	NM_001406;NM_001406	5'UTR;1stExon	DMR			17:7608007-7609195	Unclassified_Cell_type_specific	-0.47461	-1.0358	-8.76403	1.37539e-14	3.77122e-12	22.7283
cg11411107	chr3	160473611	+	cg11411107	rs111314651	0.019671	NA	NA	NA	NA	chr3:160472310-160474487	Island	PPM1L	NM_139245	TSS1500			3:161955022-161957326	3:160473555-160473720	Promoter_Associated	-0.474537	-1.34343	-8.06444	5.94396e-13	9.97939e-11	19.0633
cg26864130	chr11	119187858	-	cg26864130	NA	NA	NA	NA	NA	NA	chr11:119186947-119187894	Island	MCAM	NM_006500	TSS200			11:118692200-118693356			-0.474486	-1.38089	-6.89944	2.54447e-10	1.9066e-08	13.1776
cg05670192	chr19	56154902	-	cg05670192	NA	NA	NA	NA	NA	NA	chr19:56154791-56155117	Island	ZNF581	NM_016535	TSS200			19:60846529-60847184	19:56154437-56155112	Promoter_Associated	-0.474398	-1.86504	-6.09678	1.32551e-08	5.27671e-07	9.35171
cg14826792	chr8	63998649	+	cg14826792	NA	NA	NA	NA	NA	NA	chr8:63998227-63998737	Island	TTPA	NM_000370	TSS200			8:64160782-64161388			-0.474156	-2.06153	-7.91619	1.30672e-12	1.96459e-10	18.2972
cg20787903	chr22	30278994	+	cg20787903	NA	NA	NA	NA	NA	NA	chr22:30278978-30279858	Island	MTMR3;MTMR3;MTMR3	NM_153050;NM_021090;NM_153051	TSS200;TSS200;TSS200				22:30278771-30280164	Promoter_Associated	-0.474111	-0.443261	-5.10835	1.22354e-06	2.03324e-05	4.99826
cg22340053	chr8	145703166	+	cg22340053	rs111986793	0.024703	NA	NA	NA	NA	chr8:145703038-145703902	Island	FOXH1	NM_003923	TSS1500			8:145673857-145675054	8:145702941-145705283	Promoter_Associated	-0.474044	-1.94538	-8.39186	1.02944e-13	2.17521e-11	20.7691
cg14165142	chr20	3778655	-	cg14165142	NA	NA	NA	NA	NA	NA	chr20:3776618-3777374	S_Shore	CDC25B;CDC25B;CDC25B	NM_021873;NM_004358;NM_021872	Body;Body;Body		TRUE		20:3778343-3778750	Unclassified_Cell_type_specific	-0.473795	0.966294	-5.84394	4.38894e-08	1.41069e-06	8.19645
cg13944219	chr5	65440479	+	cg13944219	NA	NA	NA	NA	NA	NA	chr5:65439836-65440764	Island	SFRS12;SFRS12	NM_139168;NM_001077199	TSS200;Body			5:65475575-65476634	5:65439901-65440581	Promoter_Associated	-0.473433	-1.6987	-7.65815	5.09476e-12	6.45978e-10	16.9744
cg10397527	chr6	32977217	+	cg10397527	NA	NA	NA	NA	NA	NA	chr6:32975684-32975926	S_Shore	HLA-DOA	NM_002119	Body						-0.473247	-2.13694	-4.24129	4.36586e-05	0.000365429	1.59543
cg26069837	chr10	32345445	+	cg26069837	NA	NA	NA	NA	NA	NA	chr10:32344550-32345570	Island	KIF5B	NM_004521	TSS200			10:32384485-32385576	10:32344303-32345956	Promoter_Associated	-0.472725	-1.4886	-6.91503	2.35157e-10	1.78016e-08	13.254
cg24284973	chr11	131780357	-	cg24284973	rs115582583	0.012598	NA	NA	NA	NA	chr11:131780328-131781532	Island	NTM;NTM;NTM;NTM	NM_016522;NM_001144059;NM_001144058;NM_001048209	TSS1500;TSS1500;TSS1500;Body			11:131285539-131286860			-0.472632	-1.75524	-5.35023	4.20948e-07	8.68024e-06	6.02126
cg14055655	chr19	50117794	+	cg14055655	NA	NA	NA	NA	NA	NA	chr19:50119223-50119476	N_Shore	PRR12	NM_020719	Body		TRUE		19:50117590-50118239	Gene_Associated_Cell_type_specific	-0.472607	2.07384	-6.87827	2.83165e-10	2.08899e-08	13.0739
cg21863207	chr12	104234989	+	cg21863207	rs11111809	0.313242	NA	NA	NA	NA	chr12:104234273-104235327	Island	NT5DC3	NM_001031701	TSS200			12:102758404-102759457	12:104234647-104236083	Promoter_Associated	-0.472334	-1.66766	-5.19046	8.54456e-07	1.52663e-05	5.3422
cg20768717	chr11	65480045	-	cg20768717	NA	NA	NA	NA	NA	NA	chr11:65479349-65480024	S_Shore	KAT5;KAT5;KAT5	NM_182710;NM_182709;NM_006388	Body;Body;Body	RDMR		11:65235926-65236622	11:65479168-65480474	Promoter_Associated	-0.472124	-1.2648	-5.44136	2.79596e-07	6.28771e-06	6.41422
cg03727968	chr1	167451830	+	cg03727968	rs2949655	0.438274	NA	NA	NA	NA		OpenSea	CD247;CD247	NM_198053;NM_000734	Body;Body				1:167451546-167451863	Promoter_Associated_Cell_type_specific	-0.471998	1.51451	-6.37121	3.51644e-09	1.74395e-07	10.6342
cg23511374	chr11	3819013	-	cg23511374	NA	NA	NA	NA	NA	NA	chr11:3818447-3819307	Island	PGAP2;NUP98;NUP98;PGAP2;NUP98;PGAP2;PGAP2;NUP98;PGAP2	NM_001145438;NM_005387;NM_139131;NR_027015;NM_016320;NM_001145439;NR_027017;NM_139132;NR_027014	TSS200;TSS200;TSS200;TSS200;TSS200;TSS200;TSS200;TSS200;Body			11:3774771-3775827	11:3818387-3819570	Promoter_Associated	-0.4719	-2.04971	-6.76257	5.06734e-10	3.41945e-08	12.5098
cg20340141	chr7	75677497	+	cg20340141	NA	NA	NA	NA	NA	NA	chr7:75677041-75677767	Island	STYXL1;MDH2	NM_016086;NM_005918	TSS200;1stExon			7:75514654-75515768	7:75677137-75677538	Promoter_Associated	-0.47154	-1.76459	-7.42336	1.73533e-11	1.88116e-09	15.7837
cg07986199	chr12	2743038	-	cg07986199	NA	NA	NA	NA	NA	NA		OpenSea	CACNA1C;CACNA1C;CACNA1C;CACNA1C;CACNA1C;CACNA1C;CACNA1C;CACNA1C;CACNA1C;CACNA1C;CACNA1C;CACNA1C;CACNA1C;CACNA1C;CACNA1C;CACNA1C;CACNA1C;CACNA1C;CACNA1C;CACNA1C;CACNA1C;CACNA1C;CACNA1C	NM_001129844;NM_001129827;NM_001129839;NM_001129834;NM_001129841;NM_000719;NM_001129830;NM_001167625;NM_001129843;NM_001167624;NM_001129835;NM_001129837;NM_001167623;NM_001129840;NM_199460;NM_001129833;NM_001129832;NM_001129829;NM_001129846;NM_001129836;NM_001129838;NM_001129831;NM_001129842	Body;Body;Body;Body;Body;Body;Body;Body;Body;Body;Body;Body;Body;Body;Body;Body;Body;Body;Body;Body;Body;Body;Body			12:2613296-2613501			-0.471316	0.220221	-7.93895	1.15818e-12	1.77559e-10	18.4146
cg19607165	chr6	10390961	-	cg19607165	rs17572948	0.010748	NA	NA	NA	NA	chr6:10390888-10391098	Island					TRUE	6:10498875-10499621			-0.471091	-1.41193	-7.12808	7.95348e-11	7.02032e-09	14.3056
cg27470208	chr10	8373416	-	cg27470208	NA	NA	NA	NA	NA	NA		OpenSea						10:8413406-8413529	10:8373197-8374907	Unclassified_Cell_type_specific	-0.471023	1.6721	-6.17683	9.02663e-09	3.83316e-07	9.72283
cg23369564	chr1	150123734	+	cg23369564	rs72694954	0.092406	NA	NA	NA	NA	chr1:150121695-150123078	S_Shore	PLEKHO1	NM_016274	Body				1:150123711-150123938	Promoter_Associated	-0.470964	-1.96103	-7.75279	3.09794e-12	4.20599e-10	17.458
cg24437859	chr12	7066614	-	cg24437859	NA	NA	NA	NA	NA	NA		OpenSea	PTPN6;PTPN6;PTPN6	NM_002831;NM_080549;NM_080548	Body;Body;Body			12:6936760-6936987	12:7066197-7066668	Promoter_Associated	-0.470826	1.22854	-7.01049	1.44913e-10	1.17719e-08	13.7236
cg15046489	chr17	48857353	+	cg15046489	NA	NA	NA	NA	NA	NA	chr17:48858635-48858938	N_Shore							17:48857175-48857581	Unclassified_Cell_type_specific	-0.470802	1.70955	-5.50579	2.08883e-07	4.98365e-06	6.69445
cg20000718	chr4	41869433	+	cg20000718	NA	NA	NA	NA	NA	NA	chr4:41869174-41869459	Island				DMR		4:41562851-41564206			-0.470575	-1.69807	-7.04978	1.18638e-10	9.87821e-09	13.9176
cg00362818	chr13	77565320	+	cg00362818	NA	NA	NA	NA	NA	NA	chr13:77566089-77566599	N_Shore	CLN5	NM_006493	TSS1500	CDMR					-0.47047	2.0104	-6.91555	2.3454e-10	1.77613e-08	13.2566
cg15558129	chr1	219347279	+	cg15558129	NA	NA	NA	NA	NA	NA	chr1:219347109-219347572	Island	LYPLAL1	NM_138794	1stExon			1:217413733-217414126	1:219346535-219348350	Promoter_Associated	-0.469755	-1.05614	-9.38915	4.50934e-16	1.90795e-13	26.0559
cg12893361	chr12	122124854	+	cg12893361	NA	NA	NA	NA	NA	NA	chr12:122124839-122125216	Island						12:120609223-120609583	12:122124629-122125329	Promoter_Associated	-0.469395	-1.89602	-7.45315	1.48645e-11	1.64663e-09	15.9341
cg22924585	chr19	14183212	+	cg22924585	NA	NA	NA	NA	NA	NA	chr19:14182735-14184744	Island	LOC113230	NR_024282	TSS1500			19:14043766-14047165	19:14182940-14183299	Unclassified	-0.469338	-1.65967	-7.39882	1.97105e-11	2.1025e-09	15.66
cg15664462	chr3	151996146	+	cg15664462	NA	NA	NA	NA	NA	NA		OpenSea	MBNL1;MBNL1	NM_021038;NM_207292	5'UTR;5'UTR		TRUE				-0.469105	1.76916	-6.17824	8.96557e-09	3.81301e-07	9.72938
cg19916740	chr22	46275064	-	cg19916740	NA	NA	NA	NA	NA	NA	chr22:46276365-46277064	N_Shore				DMR	TRUE				-0.469046	-0.915985	-3.97655	0.00011932	0.000834447	0.647916
cg19831303	chr11	64126461	-	cg19831303	NA	NA	NA	NA	NA	NA	chr11:64126430-64126960	Island	RPS6KA4;RPS6KA4	NM_003942;NM_001006944	TSS200;TSS200		TRUE	11:63883028-63883470	11:64126454-64126778	Promoter_Associated	-0.46877	-1.05315	-8.24168	2.30592e-13	4.36517e-11	19.9844
cg08450017	chr3	45984838	-	cg08450017	NA	NA	NA	NA	NA	NA		OpenSea	CXCR6;FYCO1	NM_006564;NM_024513	TSS200;Body				3:45984803-45985127	Unclassified_Cell_type_specific	-0.468696	0.790563	-5.55122	1.69877e-07	4.2282e-06	6.8932
cg10397934	chr2	242868376	+	cg10397934	rs6747186	0.357273	NA	NA	NA	NA		OpenSea						2:242516922-242517081			-0.468559	2.05527	-5.2461	6.6869e-07	1.25824e-05	5.57721
cg04344000	chr6	117869857	+	cg04344000	NA	NA	NA	NA	NA	NA	chr6:117869097-117869530	S_Shore	DCBLD1	NM_173674	Body		TRUE		6:117869756-117870927	Promoter_Associated	-0.468486	1.30317	-5.87807	3.7396e-08	1.24032e-06	8.35082
cg06580891	chr20	3189935	+	cg06580891	rs6139031	0.165547	NA	NA	NA	NA	chr20:3190011-3190562	N_Shore	ITPA;ITPA	NM_033453;NM_181493	TSS200;TSS200				20:3189542-3190621	Promoter_Associated	-0.468463	-1.96785	-6.05592	1.61124e-08	6.19349e-07	9.16322
cg25802430	chr2	112641397	+	cg25802430	NA	NA	NA	NA	NA	NA	chr2:112641337-112641906	Island	ANAPC1	NM_022662	5'UTR			2:112357809-112358499	2:112641159-112642323	Promoter_Associated	-0.468395	-1.3571	-7.3694	2.29567e-11	2.40062e-09	15.5119
cg06506598	chr5	79783889	-	cg06506598	NA	NA	NA	NA	NA	NA	chr5:79783635-79784145	Island	FAM151B;FAM151B	NM_205548;NM_205548	1stExon;5'UTR			5:79819392-79820177	5:79783536-79784639	Promoter_Associated	-0.468267	-1.49094	-8.21944	2.59761e-13	4.85393e-11	19.8686
cg16360247	chr14	24422928	+	cg16360247	rs112883733	0.155075	NA	NA	NA	NA	chr14:24422770-24423141	Island	DHRS4;C14orf167;C14orf167;C14orf167;C14orf167	NM_021004;NR_023921;NR_023922;NR_023923;NR_023924	TSS200;Body;Body;Body;Body			14:23492677-23493040	14:24422628-24423694	Promoter_Associated	-0.468097	-1.80792	-3.95002	0.000131655	0.000905011	0.555509
cg21282054	chr17	76127608	-	cg21282054	NA	NA	NA	NA	NA	NA	chr17:76127521-76128406	Island	TMC8;TMC6	NM_152468;NM_007267	5'UTR;5'UTR			17:73639015-73640077			-0.468075	-1.70456	-7.83613	1.996e-12	2.85381e-10	17.8853
cg20320717	chr1	151043708	-	cg20320717	NA	NA	NA	NA	NA	NA	chr1:151042870-151043537	S_Shore	GABPB2	NM_144618	5'UTR			1:149309495-149310358	1:151042635-151044016	Promoter_Associated	-0.467871	-1.65286	-6.55363	1.43439e-09	8.24602e-08	11.5019
cg16108580	chr1	112135849	-	cg16108580	NA	NA	NA	NA	NA	NA		OpenSea					TRUE		1:112135354-112135936	Unclassified	-0.467726	1.06293	-6.51862	1.70528e-09	9.53957e-08	11.3345
cg08806622	chr17	27279525	-	cg08806622	NA	NA	NA	NA	NA	NA	chr17:27279335-27279669	Island	PHF12;PHF12	NM_001033561;NM_020889	TSS1500;TSS1500			17:24300707-24303761	17:27278340-27281526	Promoter_Associated	-0.467719	-0.698156	-6.17539	9.08943e-09	3.85554e-07	9.71613
cg13631105	chr18	29599349	-	cg13631105	NA	NA	NA	NA	NA	NA	chr18:29598566-29599460	Island	RNF125	NM_017831	Body			18:27852565-27853510	18:29599310-29599873	Promoter_Associated_Cell_type_specific	-0.467221	-1.93882	-7.617	6.32123e-12	7.84438e-10	16.7648
cg24854175	chr5	138126560	-	cg24854175	NA	NA	NA	NA	NA	NA		OpenSea	CTNNA1	NM_001903	Body		TRUE				-0.467176	2.06832	-6.35698	3.76942e-09	1.84603e-07	10.567
cg06235000	chr7	116593769	-	cg06235000	NA	NA	NA	NA	NA	NA	chr7:116593880-116594325	N_Shore	ST7OT4;ST7OT1;ST7;ST7	NR_002329;NR_002330;NM_018412;NM_021908	TSS200;Body;Body;Body			7:116380570-116381794	7:116592906-116594586	Promoter_Associated	-0.467088	-1.98187	-6.95502	1.92055e-10	1.49871e-08	13.4504
cg17210837	chr5	35954233	+	cg17210837	NA	NA	NA	NA	NA	NA		OpenSea	UGT3A1	NM_152404	3'UTR						-0.467017	0.994393	-5.6166	1.25962e-07	3.32356e-06	7.18095
cg16535080	chr6	30460600	-	cg16535080	NA	NA	NA	NA	NA	NA	chr6:30457369-30458175	S_Shelf	HLA-E	NM_005516	3'UTR						-0.466957	1.05927	-6.40317	3.00774e-09	1.532e-07	10.7853
cg13942604	chr11	14542103	-	cg13942604	NA	NA	NA	NA	NA	NA	chr11:14541600-14542225	Island	PSMA1;PSMA1;PSMA1	NM_001143937;NM_148976;NM_002786	TSS200;Body;TSS200			11:14497960-14498833	11:14541399-14542402	Promoter_Associated	-0.466947	-1.80284	-6.35578	3.79169e-09	1.85527e-07	10.5613
cg24635112	chr13	114908901	+	cg24635112	NA	NA	NA	NA	NA	NA	chr13:114912875-114913457	N_Shelf					TRUE	13:113926934-113927004	13:114907960-114908959	Unclassified_Cell_type_specific	-0.466641	1.55054	-7.39439	2.01684e-11	2.14591e-09	15.6377
cg18048953	chr12	12867753	+	cg18048953	NA	NA	NA	NA	NA	NA	chr12:12869798-12871248	N_Shelf						12:12758936-12759021	12:12867053-12868060	Promoter_Associated	-0.46662	-0.0469213	-10.5467	7.48763e-19	7.65276e-16	32.2878
cg14593956	chr5	138677986	-	cg14593956	NA	NA	NA	NA	NA	NA	chr5:138677333-138678248	Island	PAIP2;PAIP2	NM_001033112;NM_016480	TSS200;5'UTR			5:138705812-138706141	5:138676998-138678534	Promoter_Associated	-0.466607	-1.88008	-7.85476	1.80875e-12	2.62087e-10	17.9811
cg12032198	chr7	157264516	+	cg12032198	NA	NA	NA	NA	NA	NA	chr7:157262951-157263458	S_Shore							7:157263720-157265160	Unclassified_Cell_type_specific	-0.466436	1.709	-6.15233	1.01556e-08	4.22393e-07	9.60897
cg11179286	chr13	115047994	-	cg11179286	NA	NA	NA	NA	NA	NA	chr13:115046754-115048034	Island	UPF3A;UPF3A	NM_023011;NM_080687	Body;Body			13:114065971-114066192	13:115046615-115048159	Promoter_Associated	-0.466248	-0.646511	-9.02708	3.28061e-15	1.0783e-12	24.1237
cg18519694	chr11	118307647	-	cg18519694	NA	NA	NA	NA	NA	NA	chr11:118305422-118307705	Island	MLL	NM_005933	1stExon			11:117811867-117813392			-0.466101	-1.14524	-5.91024	3.21425e-08	1.09673e-06	8.49681
cg02789394	chr6	112191479	-	cg02789394	NA	NA	NA	NA	NA	NA	chr6:112193835-112194854	N_Shelf	FYN	NM_002037	5'UTR				6:112191338-112191543	Unclassified_Cell_type_specific	-0.465997	1.82933	-5.88383	3.63972e-08	1.21246e-06	8.37693
cg19338844	chr10	105880883	+	cg19338844	rs74154737	0.283432	NA	NA	NA	NA	chr10:105881449-105881947	N_Shore	C10orf78;C10orf78	NM_001002759;NM_145247	TSS1500;TSS1500			10:105870814-105870940	10:105880568-105882528	Promoter_Associated	-0.465847	-1.89957	-6.57135	1.31398e-09	7.66178e-08	11.5868
cg20611272	chr8	103548145	-	cg20611272	NA	NA	NA	NA	NA	NA		OpenSea					TRUE		8:103548009-103548341	Unclassified	-0.465822	1.07032	-5.52623	1.90351e-07	4.62609e-06	6.78377
cg16072664	chr21	35014885	-	cg16072664	NA	NA	NA	NA	NA	NA	chr21:35014823-35015792	Island	ITSN1;ITSN1;ITSN1;ITSN1;CRYZL1	NM_001001132;NM_003024;NM_003024;NM_001001132;NM_145858	1stExon;1stExon;5'UTR;5'UTR;TSS1500			21:33936341-33937662			-0.465821	0.15274	-5.73877	7.16723e-08	2.10538e-06	7.72384
cg02984193	chr15	91260561	-	cg02984193	NA	NA	NA	NA	NA	NA	chr15:91260384-91260919	Island	BLM	NM_000057	TSS200			15:89061131-89062089	15:91259817-91261161	Promoter_Associated	-0.465813	-2.07589	-7.07379	1.04967e-10	8.88614e-09	14.0364
cg14574127	chr6	167040925	+	cg14574127	rs6927052	0.175503	NA	NA	NA	NA	chr6:167039962-167041679	Island	RPS6KA2;RPS6KA2	NM_021135;NM_001006932	TSS200;Body			6:166959784-166961214	6:167040673-167041233	Promoter_Associated	-0.465775	-1.06716	-6.44414	2.46036e-09	1.29382e-07	10.9797
cg01892655	chr3	185216546	+	cg01892655	NA	NA	NA	NA	NA	NA	chr3:185216310-185217131	Island	TMEM41A	NM_080652	Body			3:186698948-186699807	3:185216134-185217741	Unclassified	-0.465754	-2.02098	-7.25032	4.24631e-11	4.10617e-09	14.9147
cg18310707	chr2	70121019	-	cg18310707	NA	NA	NA	NA	NA	NA		OpenSea	SNRNP27	NM_006857	TSS200	RDMR			2:70120663-70121541	Promoter_Associated	-0.465748	-1.57529	-7.24473	4.3704e-11	4.20295e-09	14.8868
cg10227393	chr19	3721525	-	cg10227393	NA	NA	NA	NA	NA	NA	chr19:3721464-3721788	Island					TRUE	19:3672383-3673257	19:3721162-3722923	Unclassified_Cell_type_specific	-0.465497	-1.51393	-8.83441	9.38067e-15	2.73076e-12	23.1008
cg18991321	chr7	100144475	+	cg18991321	NA	NA	NA	NA	NA	NA		OpenSea	AGFG2	NM_006076	Body		TRUE		7:100144278-100144596	Unclassified	-0.465431	1.41856	-5.61326	1.27906e-07	3.36476e-06	7.16621
cg05670459	chr19	6531335	+	cg05670459	NA	NA	NA	NA	NA	NA	chr19:6530826-6531552	Island	TNFSF9	NM_003811	Body			19:6481841-6482956	19:6530284-6531899	Promoter_Associated	-0.465284	-0.638551	-9.31796	6.6678e-16	2.69059e-13	25.6751
cg17306848	chr14	61793064	+	cg17306848	NA	NA	NA	NA	NA	NA	chr14:61787880-61789467	S_Shelf	PRKCH	NM_006255	Body				14:61792952-61793321	Unclassified_Cell_type_specific	-0.464837	1.8629	-4.7167	6.47025e-06	7.74045e-05	3.40739
cg02544429	chr8	144679651	-	cg02544429	NA	NA	NA	NA	NA	NA	chr8:144679237-144681851	Island	EEF1D;EEF1D;EEF1D;EEF1D;EEF1D;EEF1D;EEF1D;EEF1D;EEF1D;TIGD5;EEF1D;EEF1D;EEF1D;EEF1D	NM_001130056;NM_001130053;NM_001130055;NM_001960;NM_001960;NM_001130056;NM_001130057;NM_032378;NM_001130055;NM_032862;NM_032378;NM_001130053;NM_001130054;NM_001130054	1stExon;5'UTR;5'UTR;1stExon;5'UTR;5'UTR;TSS1500;1stExon;1stExon;TSS1500;5'UTR;1stExon;1stExon;5'UTR			8:144750097-144752893			-0.464835	-1.37108	-7.74819	3.17384e-12	4.28549e-10	17.4344
cg20488123	chr6	20689061	+	cg20488123	NA	NA	NA	NA	NA	NA		OpenSea	CDKAL1	NM_017774	Body		TRUE		6:20689003-20689252	Unclassified_Cell_type_specific	-0.464833	0.648743	-6.34218	4.0516e-09	1.96007e-07	10.4972
cg24010658	chr8	144544041	+	cg24010658	NA	NA	NA	NA	NA	NA		OpenSea	ZC3H3	NM_015117	Body			8:144615069-144615185	8:144543400-144545122	Promoter_Associated	-0.464732	1.397	-5.0943	1.30065e-06	2.13626e-05	4.93974
cg01519464	chr1	24861818	-	cg01519464	NA	NA	NA	NA	NA	NA	chr1:24861702-24861920	Island	RCAN3	NM_013441	3'UTR		TRUE	1:24734290-24734460	1:24861424-24861999	Promoter_Associated_Cell_type_specific	-0.464696	1.34715	-6.55209	1.44538e-09	8.2944e-08	11.4946
cg18642720	chr7	142493865	+	cg18642720	NA	NA	NA	NA	NA	NA	chr7:142494563-142495248	N_Shore									-0.464639	1.42481	-7.16361	6.63005e-11	5.99838e-09	14.4823
cg21577598	chr17	80084751	+	cg21577598	NA	NA	NA	NA	NA	NA	chr17:80085040-80085333	N_Shore	CCDC57	NM_198082	Body			17:77678040-77678577	17:80084280-80085965	Unclassified_Cell_type_specific	-0.464541	0.524029	-5.62162	1.23093e-07	3.26272e-06	7.20312
cg04228202	chr8	42010339	-	cg04228202	NA	NA	NA	NA	NA	NA	chr8:42009723-42011098	Island	AP3M2;AP3M2	NM_006803;NM_001134296	TSS200;TSS200			8:42128795-42130255	8:42008791-42011211	Promoter_Associated	-0.464376	-1.95428	-9.19915	1.27946e-15	4.78164e-13	25.0405
cg08979686	chr20	44600644	-	cg08979686	NA	NA	NA	NA	NA	NA	chr20:44599805-44601207	Island	ZNF335	NM_022095	5'UTR			20:44033234-44034686	20:44599469-44601449	Promoter_Associated	-0.464361	-1.53875	-7.04667	1.20533e-10	1.00181e-08	13.9023
cg17756730	chr1	172608644	+	cg17756730	NA	NA	NA	NA	NA	NA		OpenSea							1:172607936-172608700	Promoter_Associated	-0.464346	0.876513	-6.03593	1.77221e-08	6.69944e-07	9.07129
cg03486307	chr16	86597223	+	cg03486307	NA	NA	NA	NA	NA	NA	chr16:86597574-86597803	N_Shore						16:85154714-85154783	16:86596703-86598197	Unclassified	-0.464153	-1.58726	-7.32741	2.85292e-11	2.90734e-09	15.3009
cg08542715	chr17	34217960	-	cg08542715	NA	NA	NA	NA	NA	NA		OpenSea					TRUE		17:34217842-34218102	Unclassified_Cell_type_specific	-0.464108	1.19957	-6.10159	1.29538e-08	5.17641e-07	9.37391
cg25336731	chr2	70520884	+	cg25336731	NA	NA	NA	NA	NA	NA	chr2:70520468-70520999	Island	SNRPG	NM_003096	TSS200			2:70373973-70374529	2:70520087-70521185	Promoter_Associated	-0.464091	-1.74396	-6.17083	9.29133e-09	3.92691e-07	9.6949
cg03129653	chr11	16760060	+	cg03129653	rs139202879	0.0101	NA	NA	NA	NA	chr11:16759945-16760386	Island	C11orf58;C11orf58	NM_001142705;NM_014267	TSS200;TSS200			11:16716450-16716637	11:16759486-16761203	Promoter_Associated	-0.463937	-1.94615	-6.78801	4.46026e-10	3.06795e-08	12.6335
cg10860647	chr11	9385980	-	cg10860647	NA	NA	NA	NA	NA	NA	chr11:9385837-9386241	Island						11:9342267-9342817	11:9385409-9386491	Promoter_Associated	-0.463871	-1.77851	-6.92356	2.25233e-10	1.71648e-08	13.2958
cg15209934	chr19	52800385	+	cg15209934	rs117653975	0.371962	NA	NA	NA	NA	chr19:52800399-52800871	N_Shore	ZNF480	NM_144684	TSS200			19:57492012-57492768	19:52799665-52801106	Promoter_Associated	-0.463818	-0.605927	-5.75842	6.54204e-08	1.95593e-06	7.81177
cg06782686	chr14	52535964	-	cg06782686	NA	NA	NA	NA	NA	NA	chr14:52534581-52536722	Island	NID2	NM_007361	TSS200	DMR		14:51604341-51606417	14:52535172-52535998	Unclassified_Cell_type_specific	-0.463566	-2.03703	-6.66071	8.43032e-10	5.26583e-08	12.0166
cg17143179	chr6	106546824	-	cg17143179	NA	NA	NA	NA	NA	NA		OpenSea	PRDM1;PRDM1;PRDM1	NM_001198;NM_182907;NM_182907	Body;1stExon;5'UTR				6:106546552-106546871	Promoter_Associated_Cell_type_specific	-0.463356	1.55421	-5.251	6.5437e-07	1.23679e-05	5.59797
cg10981275	chr2	3381760	-	cg10981275	NA	NA	NA	NA	NA	NA	chr2:3381344-3381912	Island	TSSC1	NM_003310	TSS200			2:3360369-3361076	2:3381333-3381882	Promoter_Associated	-0.463311	-1.47352	-7.73596	3.38505e-12	4.52991e-10	17.3718
cg23828876	chr3	196001706	-	cg23828876	NA	NA	NA	NA	NA	NA		OpenSea	PCYT1A	NM_005017	5'UTR				3:196001455-196001956	Promoter_Associated	-0.463098	1.17791	-5.36296	3.97668e-07	8.30661e-06	6.07588
cg01357671	chr17	3626806	-	cg01357671	NA	NA	NA	NA	NA	NA	chr17:3626924-3627839	N_Shore	ITGAE;GSG2	NM_002208;NM_031965	Body;TSS1500			17:3573436-3574555	17:3626121-3627947	Promoter_Associated	-0.463012	-1.76974	-9.87471	3.1e-17	1.87637e-14	28.6629
cg13475271	chr9	6680923	-	cg13475271	NA	NA	NA	NA	NA	NA	chr9:6680856-6681758	Island						9:6670800-6671758	9:6680710-6682027	Promoter_Associated_Cell_type_specific	-0.462926	-1.99188	-6.51736	1.71588e-09	9.59118e-08	11.3285
cg17056676	chr10	116301354	-	cg17056676	NA	NA	NA	NA	NA	NA		OpenSea	ABLIM1;ABLIM1;ABLIM1	NM_001003408;NM_001003407;NM_002313	Body;Body;Body		TRUE		10:116300770-116301508	Unclassified_Cell_type_specific	-0.462842	0.544001	-6.78611	4.50306e-10	3.09283e-08	12.6242
cg17937102	chr1	165667565	-	cg17937102	rs4646882	0.185185	NA	NA	NA	NA	chr1:165667544-165667817	Island	ALDH9A1	NM_000696	Body			1:163933992-163934654	1:165667058-165668297	Promoter_Associated	-0.462716	-1.64866	-6.23543	6.80329e-09	3.02159e-07	9.99608
cg15635472	chr12	113659329	-	cg15635472	NA	NA	NA	NA	NA	NA	chr12:113659038-113659657	Island	TPCN1;TPCN1;TPCN1;IQCD;TPCN1	NM_017901;NM_001143819;NM_017901;NM_138451;NM_001143819	1stExon;5'UTR;5'UTR;TSS1500;1stExon			12:112143077-112144031	12:113658733-113659431	Promoter_Associated	-0.462689	-1.50573	-5.86081	4.05533e-08	1.32341e-06	8.27267
cg01182386	chr15	75182373	-	cg01182386	NA	NA	NA	NA	NA	NA	chr15:75182262-75182622	Island	MPI	NM_002435	TSS200			15:72969316-72969627	15:75181535-75182957	Promoter_Associated	-0.462597	-0.980538	-8.16595	3.45801e-13	6.25037e-11	19.5902
cg06350524	chr2	169747178	-	cg06350524	NA	NA	NA	NA	NA	NA	chr2:169746719-169747005	S_Shore	SPC25	NM_020675	TSS1500				2:169746419-169747369	Promoter_Associated	-0.462526	-1.5554	-8.40199	9.74838e-14	2.07444e-11	20.8222
cg05654404	chr1	45452166	+	cg05654404	NA	NA	NA	NA	NA	NA	chr1:45452037-45452444	Island	EIF2B3;EIF2B3;EIF2B3;EIF2B3	NM_020365;NM_001166588;NM_001166588;NM_020365	1stExon;5'UTR;1stExon;5'UTR			1:45224625-45225109	1:45451897-45452634	Promoter_Associated	-0.462242	-1.22557	-9.5768	1.60528e-16	7.86647e-14	27.0617
cg27163692	chr16	2932999	-	cg27163692	rs2285822	0.351538	NA	NA	NA	NA	chr16:2932267-2933765	Island	FLYWCH2;FLYWCH2;FLYWCH2	NM_001142499;NM_138439;NM_001142500	TSS200;TSS200;TSS200			16:2872244-2874268	16:2932078-2933788	Promoter_Associated	-0.461992	-1.4645	-6.04887	1.66633e-08	6.36796e-07	9.13076
cg00319567	chr13	60971258	-	cg00319567	NA	NA	NA	NA	NA	NA	chr13:60970403-60972045	Island	TDRD3;TDRD3;TDRD3	NM_001146071;NM_030794;NM_001146070	5'UTR;5'UTR;TSS200			13:59868211-59869353	13:60970038-60971411	Promoter_Associated	-0.461929	-1.48832	-7.15338	6.98716e-11	6.2688e-09	14.4313
cg23964739	chr19	45909864	+	cg23964739	NA	NA	NA	NA	NA	NA	chr19:45909062-45910124	Island	CD3EAP;CD3EAP;PPP1R13L	NM_012099;NM_012099;NM_001142502	5'UTR;1stExon;TSS1500			19:50601417-50602255	19:45909101-45910052	Promoter_Associated	-0.46192	-1.55505	-6.46996	2.16723e-09	1.16461e-07	11.1025
cg07691200	chr5	34916224	-	cg07691200	NA	NA	NA	NA	NA	NA	chr5:34915293-34916240	Island	BRIX1;RAD1;RAD1	NM_018321;NR_026591;NM_002853	Body;TSS1500;TSS1500			5:34951062-34951997	5:34914943-34916436	Promoter_Associated	-0.461823	-2.0565	-5.29149	5.46883e-07	1.07173e-05	5.77009
cg17283139	chr1	221915286	+	cg17283139	NA	NA	NA	NA	NA	NA	chr1:221915474-221916804	N_Shore	DUSP10;DUSP10	NM_007207;NM_144729	5'UTR;5'UTR			1:219980934-219982024	1:221914101-221916425	Promoter_Associated	-0.461771	-1.80026	-6.12184	1.17561e-08	4.7741e-07	9.46761
cg01367992	chr1	160766535	-	cg01367992	NA	NA	NA	NA	NA	NA		OpenSea	LY9;LY9	NM_001033667;NM_002348	Body;Body						-0.461759	1.43298	-5.37642	3.74404e-07	7.90638e-06	6.13376
cg03813443	chr1	232765924	+	cg03813443	NA	NA	NA	NA	NA	NA	chr1:232765088-232766479	Island						1:230831567-230833307	1:232765138-232767085	Promoter_Associated	-0.461624	-1.67673	-7.32428	2.89938e-11	2.94903e-09	15.2852
cg15519096	chr1	24833311	+	cg15519096	rs78642958	0.02474	NA	NA	NA	NA	chr1:24828865-24829878	S_Shelf	RCAN3	NM_013441	5'UTR				1:24832912-24833513	Promoter_Associated	-0.461534	1.40985	-5.37341	3.79485e-07	7.99197e-06	6.12082
cg20516032	chr8	128994030	+	cg20516032	NA	NA	NA	NA	NA	NA		OpenSea	PVT1	NR_003367	Body		TRUE		8:128993563-128994032	Unclassified_Cell_type_specific	-0.46146	1.31178	-6.32541	4.3965e-09	2.10175e-07	10.4182
cg18430255	chr10	121028978	-	cg18430255	NA	NA	NA	NA	NA	NA		OpenSea	GRK5	NM_005308	Body		TRUE		10:121028107-121029024	Promoter_Associated	-0.461396	1.38063	-6.13483	1.10461e-08	4.52909e-07	9.52778
cg06186646	chr3	107148953	-	cg06186646	NA	NA	NA	NA	NA	NA	chr3:107149820-107150910	N_Shore						3:108631425-108631837	3:107148351-107149607	Unclassified	-0.461274	-1.43443	-7.40178	1.941e-11	2.07255e-09	15.6749
cg03334072	chr7	150435779	-	cg03334072	NA	NA	NA	NA	NA	NA		OpenSea	GIMAP5	NM_018384	5'UTR						-0.461234	0.82055	-5.99372	2.16597e-08	7.9186e-07	8.87763
cg15593510	chr1	158369112	+	cg15593510	NA	NA	NA	NA	NA	NA		OpenSea	OR10T2	NM_001004475	1stExon						-0.461001	1.47688	-6.756	5.23693e-10	3.51638e-08	12.4779
cg09580478	chr2	16689509	+	cg09580478	NA	NA	NA	NA	NA	NA	chr2:16689508-16689822	Island					TRUE	2:16552818-16553296			-0.460995	-0.353546	-5.97653	2.34995e-08	8.46593e-07	8.79896
cg10688514	chr10	48354852	-	cg10688514	NA	NA	NA	NA	NA	NA	chr10:48354459-48355197	Island	ZNF488	NM_153034	TSS1500			10:47974466-47975200	10:48354093-48355751	Promoter_Associated	-0.46093	-0.267171	-8.95029	4.98915e-15	1.54783e-12	23.7155
cg11712187	chr1	10368286	+	cg11712187	NA	NA	NA	NA	NA	NA		OpenSea	KIF1B;KIF1B	NM_183416;NM_015074	3'UTR;Body				1:10367957-10368414	Unclassified_Cell_type_specific	-0.460781	1.8641	-6.75742	5.19984e-10	3.49594e-08	12.4848
cg08471335	chr22	46685653	-	cg08471335	rs11912868	0.039087	NA	NA	NA	NA	chr22:46685379-46685796	Island	TTC38	NM_017931	Body			22:45064084-45064393			-0.460317	1.57364	-7.00066	1.52333e-10	1.23105e-08	13.6751
cg26230759	chr10	13342210	+	cg26230759	NA	NA	NA	NA	NA	NA	chr10:13341377-13342223	Island	PHYH;PHYH	NM_006214;NM_001037537	TSS200;TSS1500			10:13381338-13382225	10:13341319-13342389	Unclassified_Cell_type_specific	-0.460225	-1.32814	-8.04697	6.52343e-13	1.08396e-10	18.9728
cg25643644	chr11	118210017	+	cg25643644	NA	NA	NA	NA	NA	NA		OpenSea	CD3D;CD3D	NM_000732;NM_001040651	Body;Body				11:118209999-118210327	Promoter_Associated_Cell_type_specific	-0.460198	1.83576	-5.97941	2.31806e-08	8.3719e-07	8.81215
cg09004134	chr11	1714505	-	cg09004134	rs181175031	0.0169	NA	NA	NA	NA	chr11:1715347-1715607	N_Shore	HCCA2	NM_053005	Body			11:1671039-1671356	11:1714322-1715877	Unclassified_Cell_type_specific	-0.460153	-1.70625	-7.96976	9.83461e-13	1.54552e-10	18.5736
cg22872033	chr14	21725703	-	cg22872033	rs17197037	0.432913	NA	NA	NA	NA		OpenSea	HNRNPC;HNRNPC;HNRNPC;HNRNPC	NM_031314;NM_001077442;NM_001077443;NM_004500	5'UTR;5'UTR;5'UTR;5'UTR		TRUE				-0.460131	-0.432084	-8.1918	3.01175e-13	5.53908e-11	19.7246
cg03917666	chr10	3977608	+	cg03917666	NA	NA	NA	NA	NA	NA		OpenSea					TRUE		10:3977042-3977784	Promoter_Associated	-0.46013	1.90127	-5.45542	2.62403e-07	5.97821e-06	6.4752
cg08262505	chr5	32174500	-	cg08262505	NA	NA	NA	NA	NA	NA	chr5:32173598-32174837	Island	GOLPH3	NM_022130	TSS200			5:32209238-32210648	5:32174275-32174802	Promoter_Associated	-0.460125	-0.841333	-8.17309	3.32858e-13	6.05289e-11	19.6273
cg26757673	chr22	37545423	+	cg26757673	NA	NA	NA	NA	NA	NA		OpenSea	IL2RB	NM_000878	5'UTR		TRUE		22:37544958-37546487	Promoter_Associated	-0.46003	2.00506	-7.13097	7.83687e-11	6.92759e-09	14.32
cg08792423	chr7	29847991	-	cg08792423	NA	NA	NA	NA	NA	NA	chr7:29845881-29846751	S_Shore				CDMR					-0.459906	2.0785	-5.74546	6.9482e-08	2.0531e-06	7.75374
cg18930143	chr12	8185050	-	cg18930143	NA	NA	NA	NA	NA	NA	chr12:8184964-8185616	Island	FOXJ2	NM_018416	TSS1500			12:8076232-8076927	12:8184565-8186397	Promoter_Associated	-0.459838	-1.8729	-6.61055	1.08185e-09	6.52294e-08	11.7751
cg05377120	chr12	10456885	-	cg05377120	NA	NA	NA	NA	NA	NA		OpenSea	KLRD1	NM_001114396	TSS200						-0.459756	1.84534	-5.59202	1.40984e-07	3.6393e-06	7.07254
cg08949862	chr2	63277672	+	cg08949862	NA	NA	NA	NA	NA	NA	chr2:63274475-63279430	Island	OTX1	NM_014562	TSS1500			2:63130699-63131512	2:63277129-63278042	Unclassified	-0.459622	-1.31609	-7.89828	1.43677e-12	2.14019e-10	18.205
cg11235594	chr2	110907413	-	cg11235594	NA	NA	NA	NA	NA	NA		OpenSea	NPHP1;NPHP1;NPHP1;NPHP1	NM_001128179;NM_207181;NM_000272;NM_001128178	Body;Body;Body;Body		TRUE				-0.459584	2.0159	-6.88824	2.69263e-10	2.00085e-08	13.1227
cg26525313	chr6	139466669	+	cg26525313	NA	NA	NA	NA	NA	NA		OpenSea	HECA	NM_016217	Body		TRUE				-0.459583	1.86617	-6.26782	5.81595e-09	2.65482e-07	10.1477
cg11777782	chr19	18284937	-	cg11777782	NA	NA	NA	NA	NA	NA	chr19:18284521-18285023	Island	IFI30	NM_006332	Body		TRUE	19:18145537-18146258	19:18283963-18285409	Promoter_Associated	-0.459247	-1.71652	-6.70661	6.70495e-10	4.34111e-08	12.2385
cg04319882	chr16	19535207	-	cg04319882	NA	NA	NA	NA	NA	NA	chr16:19535074-19535635	Island	CP110;CP110	NM_014711;NM_014711	1stExon;5'UTR			16:19442576-19443542	16:19534891-19536223	Promoter_Associated	-0.459247	-1.93518	-6.59678	1.15835e-09	6.8999e-08	11.7089
cg20264566	chr11	10316295	-	cg20264566	NA	NA	NA	NA	NA	NA	chr11:10316232-10316469	Island	SBF2	NM_030962	TSS1500			11:10271784-10273045			-0.459009	-1.32698	-5.91675	3.11712e-08	1.06845e-06	8.52641
cg06208288	chr1	58858074	-	cg06208288	rs849493	0.308263	NA	NA	NA	NA		OpenSea					TRUE		1:58858047-58858076	Unclassified_Cell_type_specific	-0.458984	1.12239	-5.51289	2.0225e-07	4.86058e-06	6.72547
cg15869463	chr17	62777690	-	cg15869463	rs114331438	0.043875	NA	NA	NA	NA	chr17:62774366-62777797	Island	LOC146880;LOC146880	NR_026899;NR_027487	Body;TSS200			17:60205877-60208257			-0.458948	-0.777298	-8.87505	7.51878e-15	2.23681e-12	23.3162
cg03293732	chr17	38017814	-	cg03293732	rs9899336	0.08378	NA	NA	NA	NA	chr17:38020381-38020645	N_Shelf	IKZF3;IKZF3;IKZF3;IKZF3;IKZF3;IKZF3	NM_183228;NM_183229;NM_012481;NM_183230;NM_183231;NM_183232	Body;Body;Body;Body;Body;Body						-0.458926	1.57898	-5.89114	3.51674e-08	1.17898e-06	8.41007
cg10575133	chr10	99609716	+	cg10575133	NA	NA	NA	NA	NA	NA	chr10:99609425-99610116	Island	GOLGA7B	NM_001010917	TSS1500			10:99599416-99600106			-0.45891	-1.04207	-6.20455	7.89784e-09	3.42515e-07	9.85191
cg02284273	chr10	14051679	+	cg02284273	NA	NA	NA	NA	NA	NA		OpenSea	FRMD4A	NM_018027	Body			10:14091624-14091686	10:14050971-14052411	Unclassified	-0.458793	0.77508	-5.47368	2.41613e-07	5.59252e-06	6.55453
cg01216607	chr7	100860773	-	cg01216607	NA	NA	NA	NA	NA	NA	chr7:100860297-100861029	Island	ZNHIT1;PLOD3;PLOD3	NM_006349;NM_001084;NM_001084	TSS1500;1stExon;5'UTR			7:100647018-100647864	7:100859783-100861711	Promoter_Associated	-0.458737	-0.916302	-7.58546	7.45584e-12	9.08596e-10	16.6044
cg13584531	chr2	99280070	-	cg13584531	NA	NA	NA	NA	NA	NA		OpenSea	MGAT4A;MGAT4A	NM_001160154;NM_012214	TSS200;Body						-0.458511	1.17713	-6.4475	2.42007e-09	1.27815e-07	10.9957
cg09184467	chr10	14995699	+	cg09184467	rs3814176	0.431632	NA	NA	NA	NA	chr10:14995680-14996431	Island	DCLRE1C;DCLRE1C;DCLRE1C;DCLRE1C	NM_001033855;NM_022487;NM_001033857;NM_001033858	Body;5'UTR;5'UTR;5'UTR			10:15035431-15036437	10:14994727-14996758	Promoter_Associated	-0.458382	-0.0832379	-8.82817	9.70449e-15	2.80365e-12	23.0678
cg08197531	chr12	12878211	+	cg08197531	NA	NA	NA	NA	NA	NA	chr12:12876630-12879002	Island	APOLD1	NM_001130415	TSS1500			12:12769041-12769901	12:12878182-12879168	Promoter_Associated	-0.45826	-1.29617	-7.50622	1.12761e-11	1.29993e-09	16.2025
cg22122760	chr6	33160946	-	cg22122760	rs11969547	0.095978	NA	NA	NA	NA	chr6:33160945-33161337	Island	COL11A2;COL11A2;COL11A2;COL11A2	NM_080679;NM_001163771;NM_080681;NM_080680	TSS1500;TSS1500;TSS1500;TSS1500			6:33268582-33269312			-0.458175	-0.494379	-9.19827	1.28567e-15	4.80058e-13	25.0357
cg11968414	chr6	30684868	-	cg11968414	NA	NA	NA	NA	NA	NA	chr6:30684836-30685503	Island	MDC1	NM_014641	5'UTR			6:30792816-30793520	6:30684799-30685738	Promoter_Associated	-0.458043	-1.78198	-8.42397	8.65979e-14	1.87026e-11	20.9374
cg21172458	chr8	86350927	+	cg21172458	NA	NA	NA	NA	NA	NA	chr8:86350765-86351196	Island	CA3	NM_005181	TSS200			8:86537796-86538387			-0.457947	-0.822526	-8.88544	7.10477e-15	2.12568e-12	23.3713
cg25995133	chr11	407183	-	cg25995133	NA	NA	NA	NA	NA	NA	chr11:406491-407871	Island	SIGIRR;SIGIRR;SIGIRR	NM_001135054;NM_021805;NM_001135053	Body;Body;Body		TRUE	11:396355-397842	11:406490-408096	Unclassified	-0.45758	-1.85611	-5.76039	6.48252e-08	1.94145e-06	7.82057
cg02028540	chr16	67193883	+	cg02028540	NA	NA	NA	NA	NA	NA	chr16:67193546-67194039	Island	TRADD;FBXL8	NM_003789;NM_018378	TSS200;TSS200			16:65750547-65751734	16:67193608-67195198	Promoter_Associated	-0.457568	-1.32759	-6.21209	7.61541e-09	3.32015e-07	9.8871
cg12433559	chr10	72362730	+	cg12433559	NA	NA	NA	NA	NA	NA	chr10:72360255-72360605	S_Shelf	PRF1;PRF1	NM_005041;NM_001083116	TSS200;TSS200				10:72361599-72363398	Unclassified_Cell_type_specific	-0.45753	0.947087	-7.10508	8.94643e-11	7.77104e-09	14.1915
cg25856120	chr17	46970223	-	cg25856120	rs66985080	0.217352	NA	NA	NA	NA	chr17:46969695-46970125	S_Shore	ATP5G1;ATP5G1;ATP5G1	NM_005175;NM_005175;NM_001002027	1stExon;5'UTR;5'UTR			17:44324608-44325231	17:46969569-46970458	Promoter_Associated	-0.45753	-1.50831	-7.55806	8.60387e-12	1.02997e-09	16.4652
cg05656688	chr1	25254088	+	cg05656688	NA	NA	NA	NA	NA	NA	chr1:25255527-25259005	N_Shore	RUNX3;RUNX3	NM_001031680;NM_004350	Body;Body		TRUE	1:25126670-25126749			-0.457472	1.37838	-7.47941	1.29667e-11	1.46302e-09	16.0667
cg01861509	chr10	73849626	-	cg01861509	NA	NA	NA	NA	NA	NA	chr10:73846806-73848233	S_Shore	SPOCK2;SPOCK2	NM_014767;NM_001134434	TSS1500;TSS1500						-0.457439	2.03283	-5.84463	4.37477e-08	1.40711e-06	8.19957
cg11804414	chr12	122712137	+	cg11804414	NA	NA	NA	NA	NA	NA	chr12:122710054-122711371	S_Shore	DIABLO;DIABLO;DIABLO;DIABLO	NM_138929;NM_019887;NR_024601;NR_024600	TSS200;TSS200;TSS200;TSS200			12:121278017-121278107			-0.457438	1.15038	-6.96868	1.79197e-10	1.41201e-08	13.5176
cg24883642	chr15	40226588	+	cg24883642	NA	NA	NA	NA	NA	NA	chr15:40226210-40226631	Island	EIF2AK4	NM_001013703	Body			15:38013503-38013900	15:40225892-40227114	Promoter_Associated	-0.457433	-0.781489	-8.48395	6.26735e-14	1.41618e-11	21.2521
cg22266749	chr4	110223959	+	cg22266749	NA	NA	NA	NA	NA	NA	chr4:110222970-110224257	Island	COL25A1;COL25A1	NM_032518;NM_198721	TSS200;TSS200	DMR		4:110442759-110443802	4:110223550-110224486	Unclassified_Cell_type_specific	-0.457386	-1.3076	-3.16394	0.00196756	0.00842367	-1.9558
cg27569265	chr3	33138442	+	cg27569265	NA	NA	NA	NA	NA	NA	chr3:33138083-33138769	Island	TMPPE;TMPPE;GLB1;GLB1;GLB1	NM_001039770;NM_001136238;NM_001135602;NM_001079811;NM_000404	TSS200;TSS200;Body;TSS200;Body			3:33112741-33113882	3:33137823-33139014	Promoter_Associated	-0.457168	-1.53035	-6.22704	7.08519e-09	3.12794e-07	9.95684
cg03646922	chr17	4167316	-	cg03646922	NA	NA	NA	NA	NA	NA	chr17:4166705-4167353	Island	ANKFY1;ANKFY1	NM_020740;NM_016376	TSS200;TSS200			17:4113455-4114256	17:4166088-4168142	Promoter_Associated	-0.457125	-1.83076	-6.41005	2.90803e-09	1.49116e-07	10.818
cg16541275	chr17	78821754	-	cg16541275	NA	NA	NA	NA	NA	NA	chr17:78818440-78818696	S_Shelf	RPTOR;RPTOR	NM_001163034;NM_020761	Body;Body			17:76436109-76436524	17:78820436-78822003	Promoter_Associated	-0.457097	0.727331	-7.08031	1.01533e-10	8.64242e-09	14.0687
cg26137915	chr14	69247337	+	cg26137915	rs8020118	0.010377	NA	NA	NA	NA		OpenSea					TRUE		14:69247184-69247411	Unclassified_Cell_type_specific	-0.456962	1.43202	-6.15393	1.00778e-08	4.19641e-07	9.6164
cg18727303	chr10	1779972	-	cg18727303	NA	NA	NA	NA	NA	NA	chr10:1778784-1780018	Island	ADARB2	NM_018702	TSS1500	DMR		10:1768785-1770018	10:1779639-1780070	Unclassified	-0.45681	-0.975917	-6.85853	3.12815e-10	2.27183e-08	12.9774
cg22862480	chr10	7450355	+	cg22862480	NA	NA	NA	NA	NA	NA	chr10:7449376-7455339	Island	SFMBT2	NM_001029880	5'UTR	DMR		10:7489390-7491695	10:7450117-7450866	Promoter_Associated	-0.45679	-1.92047	-8.17042	3.37646e-13	6.11877e-11	19.6134
cg23631538	chr1	111743537	-	cg23631538	NA	NA	NA	NA	NA	NA	chr1:111746337-111747303	N_Shelf	DENND2D	NM_024901	TSS1500				1:111742893-111743586	Unclassified	-0.456709	1.45248	-5.60576	1.32383e-07	3.45808e-06	7.1331
cg00446123	chr20	62367888	-	cg00446123	NA	NA	NA	NA	NA	NA	chr20:62368955-62371962	N_Shore	LIME1	NM_017806	TSS200	CDMR			20:62367587-62368260	Promoter_Associated	-0.4562	1.21972	-5.82235	4.85575e-08	1.53156e-06	8.09902
cg02941118	chr11	134201640	+	cg02941118	rs3098653	0.170631	NA	NA	NA	NA	chr11:134201784-134202407	N_Shore	GLB1L2	NM_138342	TSS200		TRUE	11:133706672-133707698	11:134201236-134202836	Unclassified	-0.456148	-1.30709	-7.59929	6.93539e-12	8.50352e-10	16.6747
cg03865648	chr3	173113856	-	cg03865648	NA	NA	NA	NA	NA	NA	chr3:173115404-173115775	N_Shore				DMR		3:174595782-174596656			-0.456051	-0.897956	-4.91291	2.83717e-06	3.99515e-05	4.19387
cg07573020	chr5	14707001	+	cg07573020	NA	NA	NA	NA	NA	NA		OpenSea	ANKH	NM_054027	3'UTR		TRUE		5:14706472-14707306	Promoter_Associated_Cell_type_specific	-0.455911	1.17993	-5.44593	2.73888e-07	6.18352e-06	6.43404
cg09699830	chr16	72516874	-	cg09699830	NA	NA	NA	NA	NA	NA		OpenSea					TRUE				-0.455737	1.35603	-5.37937	3.6948e-07	7.82048e-06	6.14647
cg14054883	chr9	93619467	-	cg14054883	NA	NA	NA	NA	NA	NA		OpenSea	SYK;SYK;SYK;SYK	NR_024155;NR_024156;NM_003177;NM_001135052	Body;Body;Body;Body						-0.455673	1.65542	-5.02469	1.75796e-06	2.71982e-05	4.65142
cg07162000	chr10	1774873	-	cg07162000	NA	NA	NA	NA	NA	NA	chr10:1778784-1780018	N_Shelf	ADARB2	NM_018702	Body			10:1764843-1764960			-0.455655	-1.94056	-4.83349	3.97082e-06	5.22065e-05	3.87292
cg10699171	chr6	24936965	+	cg10699171	NA	NA	NA	NA	NA	NA		OpenSea					TRUE		6:24936899-24937262	Unclassified	-0.45558	0.973344	-5.02484	1.75684e-06	2.71828e-05	4.65203
cg14412134	chr14	64912417	-	cg14412134	NA	NA	NA	NA	NA	NA		OpenSea	MTHFD1	NM_005956	Body		TRUE		14:64912051-64912654	Unclassified	-0.455448	1.75204	-5.73446	7.31226e-08	2.13871e-06	7.70455
cg02374486	chr10	72362809	-	cg02374486	NA	NA	NA	NA	NA	NA	chr10:72360255-72360605	S_Shelf	PRF1;PRF1	NM_001083116;NM_005041	TSS1500;TSS1500				10:72361599-72363398	Unclassified_Cell_type_specific	-0.455361	0.809112	-6.49031	1.96069e-09	1.07186e-07	11.1994
cg17643699	chr12	27091484	+	cg17643699	NA	NA	NA	NA	NA	NA	chr12:27091158-27091857	Island	FGFR1OP2;C12orf11;FGFR1OP2	NM_015633;NM_018164;NM_015633	5'UTR;TSS1500;1stExon			12:26981982-26983221	12:27090819-27092210	Promoter_Associated	-0.45534	-1.90717	-5.93142	2.90876e-08	1.01014e-06	8.59314
cg16093065	chr22	40720633	+	cg16093065	NA	NA	NA	NA	NA	NA		OpenSea	TNRC6B;TNRC6B;TNRC6B	NM_001162501;NM_001024843;NM_015088	3'UTR;3'UTR;3'UTR		TRUE		22:40720429-40721643	Promoter_Associated_Cell_type_specific	-0.455297	1.96983	-5.90806	3.24743e-08	1.10554e-06	8.48691
cg17839611	chr17	47286802	-	cg17839611	NA	NA	NA	NA	NA	NA		OpenSea	ABI3;ABI3;GNGT2	NM_016428;NM_001135186;NM_031498	TSS1500;TSS1500;TSS200		TRUE		17:47286282-47287028	Unclassified_Cell_type_specific	-0.455236	0.816547	-6.88534	2.73234e-10	2.02564e-08	13.1085
cg25554496	chr17	63036095	-	cg25554496	NA	NA	NA	NA	NA	NA		OpenSea	GNA13	NM_006572	Body		TRUE		17:63035609-63036134	Unclassified	-0.455185	1.5785	-5.3625	3.98476e-07	8.31853e-06	6.07393
cg19090637	chr4	111119052	-	cg19090637	rs116463049	0.011295	NA	NA	NA	NA	chr4:111119187-111120084	N_Shore	ELOVL6;ELOVL6	NM_024090;NM_001130721	Body;Body			4:111336809-111338568			-0.455151	-1.72135	-7.16631	6.53886e-11	5.93293e-09	14.4957
cg16695597	chr4	142557614	+	cg16695597	rs186831062	0.0174	NA	NA	NA	NA	chr4:142557388-142558323	Island	IL15;IL15	NM_172174;NM_000585	TSS200;TSS200		TRUE	4:142776802-142777518	4:142557111-142558569	Promoter_Associated	-0.455128	-1.46297	-8.61942	3.01365e-14	7.3815e-12	21.9647
cg04174091	chr11	122935222	-	cg04174091	NA	NA	NA	NA	NA	NA	chr11:122932173-122933803	S_Shore				RDMR					-0.454869	0.679018	-5.91095	3.20357e-08	1.09345e-06	8.50002
cg01446614	chr12	114404317	-	cg01446614	rs77365057	0.084158	NA	NA	NA	NA	chr12:114404002-114404377	Island	RBM19;RBM19;RBM19	NM_001146698;NM_016196;NM_001146699	TSS200;TSS200;TSS200			12:112887826-112888750	12:114403527-114405075	Promoter_Associated	-0.454761	-1.53362	-7.36823	2.30968e-11	2.41407e-09	15.506
cg13681468	chr4	90227879	+	cg13681468	NA	NA	NA	NA	NA	NA	chr4:90228714-90229010	N_Shore	GPRIN3	NM_198281	5'UTR	RDMR					-0.454361	1.76701	-5.71451	8.02059e-08	2.30413e-06	7.61549
cg26012482	chr2	8423155	+	cg26012482	NA	NA	NA	NA	NA	NA		OpenSea						2:8340519-8340607			-0.453868	2.0062	-6.99491	1.5685e-10	1.2595e-08	13.6468
cg09855140	chr13	100004097	+	cg09855140	rs727263	0.183729	NA	NA	NA	NA		OpenSea	UBAC2;FKSG29;UBAC2;UBAC2	NM_001144072;NR_024013;NM_177967;NR_026644	Body;Body;Body;Body				13:100003900-100004355	Unclassified_Cell_type_specific	-0.453831	1.44546	-5.86941	3.89478e-08	1.28147e-06	8.31162
cg04780380	chr20	57412945	-	cg04780380	NA	NA	NA	NA	NA	NA	chr20:57414595-57414896	N_Shore	GNASAS	NR_002785	Body						-0.45378	1.69642	-6.70978	6.59979e-10	4.28226e-08	12.2538
cg07031794	chr2	26568949	-	cg07031794	NA	NA	NA	NA	NA	NA	chr2:26568408-26569366	Island	SELI;GPR113	NM_033505;NM_153835	TSS200;Body			2:26421802-26422897	2:26568278-26570162	Promoter_Associated	-0.453732	-1.10996	-7.10588	8.9098e-11	7.74563e-09	14.1954
cg26708427	chr18	3250274	+	cg26708427	NA	NA	NA	NA	NA	NA	chr18:3247293-3248257	S_Shelf	MYL12A	NM_006471	5'UTR						-0.453631	1.78544	-5.89352	3.47756e-08	1.16883e-06	8.42088
cg10990170	chr6	29974521	-	cg10990170	rs9261105	0.201729	NA	NA	NA	NA	chr6:29974220-29975369	Island	HLA-J;NCRNA00171	NR_024240;NR_026751	Body;Body		TRUE	6:30082200-30083348	6:29974282-29975094	Unclassified_Cell_type_specific	-0.453531	-1.12379	-7.52424	1.02652e-11	1.20046e-09	16.2937
cg26244575	chr12	76354015	+	cg26244575	NA	NA	NA	NA	NA	NA		OpenSea					TRUE		12:76353928-76354186	Unclassified_Cell_type_specific	-0.453458	0.627038	-5.73785	7.19812e-08	2.11268e-06	7.7197
cg23603076	chr14	24605279	+	cg23603076	NA	NA	NA	NA	NA	NA	chr14:24605082-24605760	Island	PSME1;PSME1	NM_176783;NM_006263	TSS200;TSS200			14:23674904-23675535	14:24604820-24605872	Promoter_Associated	-0.453435	-1.59828	-6.38552	3.27891e-09	1.64755e-07	10.7018
cg14428530	chr9	72874528	-	cg14428530	NA	NA	NA	NA	NA	NA	chr9:72873689-72874264	S_Shore	SMC5	NM_015110	Body			9:72064291-72064382	9:72873016-72874792	Promoter_Associated	-0.453435	-1.42501	-6.09033	1.36708e-08	5.41295e-07	9.32189
cg12793305	chr1	39325375	+	cg12793305	NA	NA	NA	NA	NA	NA	chr1:39324815-39325721	Island	RRAGC	NM_022157	TSS200			1:39097330-39098554	1:39324624-39326353	Promoter_Associated	-0.453361	0.12899	-6.55296	1.43916e-09	8.26777e-08	11.4987
cg05095774	chr18	52495848	-	cg05095774	NA	NA	NA	NA	NA	NA	chr18:52495604-52496007	Island	RAB27B;RAB27B	NM_004163;NM_004163	5'UTR;1stExon		TRUE	18:50646539-50647005	18:52495183-52496166	Unclassified_Cell_type_specific	-0.453279	-0.987005	-10.3892	1.79404e-18	1.64544e-15	31.4372
cg04371413	chr2	207395846	+	cg04371413	rs17211709	0.030954	NA	NA	NA	NA		OpenSea	ADAM23	NM_003812	Body		TRUE		2:207395505-207395858	Unclassified_Cell_type_specific	-0.453064	1.41131	-5.4736	2.41695e-07	5.59379e-06	6.5542
cg10651583	chr12	57941069	-	cg10651583	NA	NA	NA	NA	NA	NA	chr12:57940563-57940981	S_Shore	DCTN2	NM_006400	TSS200			12:56226831-56227372	12:57939858-57941608	Promoter_Associated	-0.452982	-1.24651	-5.50395	2.10635e-07	5.0156e-06	6.68642
cg18682028	chr3	46035439	+	cg18682028	NA	NA	NA	NA	NA	NA	chr3:46037013-46037473	N_Shore	FYCO1	NM_024513	5'UTR		TRUE		3:46035218-46035703	Promoter_Associated	-0.45276	1.90324	-6.40567	2.97109e-09	1.51775e-07	10.7972
cg02370978	chr2	86333167	+	cg02370978	rs2303340	0.117109	NA	NA	NA	NA	chr2:86332659-86333650	Island	PTCD3;POLR1A;POLR1A	NM_017952;NM_015425;NM_015425	TSS200;1stExon;5'UTR				2:86332472-86333668	Promoter_Associated	-0.452683	-1.4601	-5.99315	2.17189e-08	7.93816e-07	8.875
cg14222656	chr22	24820518	-	cg14222656	rs11704959	0.065874	NA	NA	NA	NA	chr22:24819537-24820810	Island				DMR		22:23149607-23150989			-0.452674	-1.31311	-6.88666	2.71422e-10	2.01475e-08	13.115
cg12690978	chr12	8801526	-	cg12690978	NA	NA	NA	NA	NA	NA		OpenSea	MFAP5	NM_003480	Body				12:8801211-8801623	Unclassified	-0.452609	1.35173	-6.42349	2.72275e-09	1.40975e-07	10.8817
cg13976253	chr1	202317780	-	cg13976253	NA	NA	NA	NA	NA	NA	chr1:202317657-202318196	Island	PPP1R12B;PPP1R12B;PPP1R12B;PPP1R12B	NM_001167857;NM_002481;NM_001167858;NM_032105	TSS200;TSS200;TSS200;TSS200			1:200584281-200584920	1:202317357-202318944	Promoter_Associated	-0.452599	-1.13507	-7.27224	3.79278e-11	3.71898e-09	15.0244
cg11417323	chr1	41160271	+	cg11417323	rs12060189	0.098432	NA	NA	NA	NA	chr1:41157162-41157975	S_Shelf	NFYC;NFYC;NFYC;NFYC;NFYC	NM_014223;NM_001142590;NM_001142588;NM_001142589;NM_001142587	5'UTR;5'UTR;5'UTR;5'UTR;5'UTR						-0.452546	1.21955	-6.81319	3.93031e-10	2.75992e-08	12.7561
cg08109681	chr6	166825084	+	cg08109681	NA	NA	NA	NA	NA	NA	chr6:166825827-166826439	N_Shore	RPS6KA2;RPS6KA2	NM_001006932;NM_021135	3'UTR;3'UTR			6:166744792-166745119	6:166824864-166825907	Unclassified_Cell_type_specific	-0.452284	1.48723	-6.23769	6.7295e-09	2.99388e-07	10.0066
cg08132711	chr4	15964743	+	cg08132711	rs116291487	0.026064	NA	NA	NA	NA		OpenSea	FGFBP2	NM_031950	1stExon						-0.452129	1.7482	-7.70037	4.0818e-12	5.33982e-10	17.1899
cg08763161	chr6	10413424	+	cg08763161	rs56180902	0.071782	NA	NA	NA	NA	chr6:10411394-10413857	Island	TFAP2A;TFAP2A;TFAP2A	NM_001042425;NM_001032280;NM_003220	Body;TSS1500;Body			6:10520305-10522034			-0.452081	-0.602764	-8.29863	1.69909e-13	3.35063e-11	20.2816
cg09717979	chr4	103790325	-	cg09717979	NA	NA	NA	NA	NA	NA	chr4:103789994-103790510	Island	UBE2D3;CISD2;UBE2D3	NM_181893;NM_001008388;NM_181890	TSS1500;1stExon;TSS1500			4:104009362-104010188	4:103789465-103791461	Promoter_Associated	-0.45206	-1.44678	-8.68463	2.1165e-14	5.49485e-12	22.3087
cg07122172	chr12	58026544	+	cg07122172	NA	NA	NA	NA	NA	NA	chr12:58025661-58027056	Island	B4GALNT1	NM_001478	5'UTR		TRUE	12:56311938-56313467	12:58026237-58027665	Unclassified	-0.452039	-1.16379	-6.67509	7.84703e-10	4.96274e-08	12.0861
cg26485825	chr18	21452895	-	cg26485825	NA	NA	NA	NA	NA	NA		OpenSea	LAMA3;LAMA3;LAMA3;LAMA3	NM_001127718;NM_000227;NM_198129;NM_001127717	TSS200;TSS200;Body;Body						-0.451655	1.93056	-6.04726	1.67912e-08	6.4088e-07	9.12338
cg18461635	chr3	46990143	-	cg18461635	NA	NA	NA	NA	NA	NA		OpenSea	CCDC12	NM_144716	Body		TRUE		3:46989585-46990221	Unclassified_Cell_type_specific	-0.451648	1.77895	-6.26912	5.77934e-09	2.64224e-07	10.1538
cg22263405	chr18	42259244	+	cg22263405	NA	NA	NA	NA	NA	NA	chr18:42258983-42260795	Island	SETBP1	NM_001130110	TSS1500			18:40512992-40513782	18:42258660-42259820	Promoter_Associated	-0.451595	-1.06709	-7.85091	1.84597e-12	2.66104e-10	17.9613
cg17287725	chr19	12267592	+	cg17287725	NA	NA	NA	NA	NA	NA	chr19:12266998-12267686	Island	ZNF625	NM_145233	TSS200	DMR		19:12128035-12128686	19:12266987-12267811	Unclassified	-0.451553	-1.92225	-5.3029	5.19826e-07	1.0285e-05	5.81877
cg02799478	chr19	58090259	-	cg02799478	NA	NA	NA	NA	NA	NA	chr19:58089801-58090524	Island	ZNF416	NM_017879	TSS200			19:62781614-62782290	19:58089839-58090776	Unclassified	-0.450981	-1.9963	-6.56563	1.35169e-09	7.84898e-08	11.5594
cg25248278	chr17	38696507	+	cg25248278	NA	NA	NA	NA	NA	NA		OpenSea					TRUE				-0.450898	0.950398	-7.5778	7.76032e-12	9.40844e-10	16.5655
cg15345437	chr11	62620843	+	cg15345437	NA	NA	NA	NA	NA	NA	chr11:62623359-62623877	N_Shelf	SNORD22;SNORD31;SNHG1	NR_000008;NR_002560;NR_003098	TSS1500;Body;Body						-0.450742	1.83006	-5.81437	5.04026e-08	1.58049e-06	8.06307
cg14911460	chr7	30810852	-	cg14911460	rs113356631	0.034767	NA	NA	NA	NA	chr7:30810863-30811550	N_Shore	FAM188B	NM_032222	TSS200			7:30777377-30778075	7:30810456-30812134	Promoter_Associated	-0.450582	-1.48272	-10.697	3.25064e-19	3.74103e-16	33.0999
cg14094409	chr12	122712093	+	cg14094409	rs78028061	0.033364	NA	NA	NA	NA	chr12:122710054-122711371	S_Shore	DIABLO;DIABLO;DIABLO;DIABLO	NM_138929;NM_019887;NR_024601;NR_024600	TSS200;TSS200;TSS200;TSS200			12:121278017-121278107			-0.45044	1.54064	-6.35058	3.88911e-09	1.89455e-07	10.5368
cg09133422	chr1	155292660	+	cg09133422	NA	NA	NA	NA	NA	NA	chr1:155292469-155295433	Island	RUSC1;C1orf104;RUSC1;RUSC1	NM_001105204;NM_001039517;NM_001105203;NM_001105205	Body;5'UTR;Body;TSS1500			1:153559094-153561951	1:155292582-155292753	Unclassified	-0.450407	-0.921205	-8.19321	2.98909e-13	5.50464e-11	19.732
cg06351682	chr2	106974831	-	cg06351682	NA	NA	NA	NA	NA	NA		OpenSea					TRUE		2:106974789-106974845	Unclassified_Cell_type_specific	-0.450121	1.55671	-4.94361	2.4892e-06	3.59605e-05	4.31888
cg16429735	chr5	1268949	+	cg16429735	NA	NA	NA	NA	NA	NA	chr5:1270778-1271101	N_Shore	TERT;TERT	NM_198255;NM_198253	Body;Body			5:1321636-1321950	5:1268756-1269048	Unclassified_Cell_type_specific	-0.450014	1.33459	-5.72875	7.50827e-08	2.18448e-06	7.67907
cg18436788	chr1	3704244	+	cg18436788	NA	NA	NA	NA	NA	NA	chr1:3703672-3703908	S_Shore	LRRC47	NM_020710	Body			1:3693262-3694118	1:3704001-3704246	Gene_Associated_Cell_type_specific	-0.45001	2.02011	-5.43081	2.93215e-07	6.52828e-06	6.36853
cg05063087	chr10	102133314	-	cg05063087	NA	NA	NA	NA	NA	NA	chr10:102133021-102133557	Island	C10orf75	NR_026762	TSS200			10:102122867-102123802	10:102132868-102134271	Promoter_Associated	-0.449778	-1.50401	-8.46593	6.90727e-14	1.53844e-11	21.1575
cg16355271	chr7	27283528	-	cg16355271	rs17437824	0.10781	NA	NA	NA	NA	chr7:27283408-27283614	Island	EVX1	NM_001989	Body		TRUE	7:27248630-27250128	7:27283357-27284006	Unclassified_Cell_type_specific	-0.449749	-1.37323	-10.188	5.47289e-18	4.20286e-15	30.3514
cg25697492	chr19	2950919	-	cg25697492	NA	NA	NA	NA	NA	NA	chr19:2950359-2950962	Island						19:2901138-2901949	19:2949663-2951356	Promoter_Associated	-0.449583	-1.74788	-6.59672	1.15872e-09	6.90021e-08	11.7086
cg24310395	chr3	39309435	+	cg24310395	NA	NA	NA	NA	NA	NA		OpenSea	CX3CR1;CX3CR1;CX3CR1;CX3CR1	NM_001171174;NM_001171171;NM_001337;NM_001171172	Body;5'UTR;5'UTR;5'UTR				3:39309188-39309709	Unclassified_Cell_type_specific	-0.449505	1.152	-5.63311	1.16762e-07	3.12505e-06	7.25393
cg11683242	chr1	32716557	-	cg11683242	rs11576024	0.031993	NA	NA	NA	NA	chr1:32713918-32714186	S_Shelf	LCK	NM_005356	TSS1500				1:32716484-32717207	Promoter_Associated	-0.449376	1.55202	-6.15901	9.83499e-09	4.11521e-07	9.63996
cg21211418	chr9	34957783	-	cg21211418	NA	NA	NA	NA	NA	NA	chr9:34957717-34958472	Island	KIAA1045	NM_015297	TSS1500			9:34947638-34948460	9:34957718-34958627	Unclassified_Cell_type_specific	-0.449349	-0.392733	-5.9209	3.05678e-08	1.05137e-06	8.54526
cg23760945	chr19	11665140	-	cg23760945	NA	NA	NA	NA	NA	NA		OpenSea	ELOF1	NM_032377	Body						-0.44876	1.22174	-5.67022	9.84236e-08	2.7236e-06	7.4184
cg09834503	chr14	31679612	+	cg09834503	NA	NA	NA	NA	NA	NA	chr14:31676011-31677446	S_Shelf							14:31679546-31679618	Unclassified_Cell_type_specific	-0.448753	1.96363	-6.72255	6.19158e-10	4.05217e-08	12.3157
cg01858300	chr15	41233997	+	cg01858300	NA	NA	NA	NA	NA	NA	chr15:41233833-41234391	Island					TRUE	15:39021126-39022224	15:41233837-41234466	Promoter_Associated	-0.448694	-1.97168	-7.61818	6.2822e-12	7.80285e-10	16.7708
cg22988507	chr4	2936131	+	cg22988507	NA	NA	NA	NA	NA	NA	chr4:2935461-2936974	Island	C4orf10;MFSD10;MFSD10	NR_015453;NM_001120;NM_001146069	TSS1500;TSS200;5'UTR			4:2905307-2907099			-0.448658	-1.42786	-4.46777	1.78674e-05	0.000175887	2.44153
cg11201447	chr8	128808063	+	cg11201447	NA	NA	NA	NA	NA	NA	chr8:128806081-128806899	S_Shore	MIR1204;PVT1	NR_031609;NR_003367	TSS200;Body	RDMR					-0.448452	0.397441	-6.44467	2.45398e-09	1.29128e-07	10.9822
cg17648076	chr2	191888150	+	cg17648076	NA	NA	NA	NA	NA	NA	chr2:191884943-191885417	S_Shelf							2:191887961-191888500	Unclassified	-0.448298	1.18011	-6.56352	1.36587e-09	7.9182e-08	11.5493
cg06098346	chr12	48499667	+	cg06098346	NA	NA	NA	NA	NA	NA	chr12:48499463-48500232	Island	PFKM;SENP1;PFKM	NM_001166686;NM_014554;NM_001166686	1stExon;TSS200;5'UTR			12:46785605-46786303	12:48498731-48500705	Promoter_Associated	-0.448253	-1.93799	-5.58542	1.45305e-07	3.72635e-06	7.04349
cg11614622	chr11	66623681	-	cg11614622	NA	NA	NA	NA	NA	NA	chr11:66623620-66626614	Island	LRFN4;PC;PC;PC	NM_024036;NM_022172;NM_000920;NM_001040716	TSS1500;Body;Body;Body			11:66380231-66381499	11:66623597-66624079	Promoter_Associated	-0.447994	-0.936951	-7.95439	1.0671e-12	1.65773e-10	18.4942
cg20805133	chr2	242802192	-	cg20805133	NA	NA	NA	NA	NA	NA	chr2:242805752-242806034	N_Shelf	PDCD1	NM_005018	TSS1500		TRUE				-0.44796	0.984474	-5.65317	1.06469e-07	2.89888e-06	7.34276
cg03000848	chr16	396164	-	cg03000848	NA	NA	NA	NA	NA	NA		OpenSea	AXIN1;AXIN1	NM_003502;NM_181050	Body;Body		TRUE	16:336050-336632			-0.447847	1.5054	-6.71164	6.53848e-10	4.25035e-08	12.2628
cg02842104	chr19	12251201	+	cg02842104	NA	NA	NA	NA	NA	NA	chr19:12250694-12251217	Island	ZNF20	NM_021143	TSS200			19:12111695-12112217	19:12250658-12252346	Promoter_Associated	-0.447795	-1.3757	-6.39173	3.18085e-09	1.60596e-07	10.7312
cg20152424	chr11	576455	-	cg20152424	NA	NA	NA	NA	NA	NA	chr11:575464-577093	Island	PHRF1;LOC143666	NM_020901;NR_026967	TSS200;TSS1500			11:565092-567331	11:575802-576639	Promoter_Associated	-0.447775	-1.7718	-6.59839	1.14914e-09	6.85558e-08	11.7166
cg27383335	chr16	75600057	+	cg27383335	NA	NA	NA	NA	NA	NA	chr16:75600006-75600860	Island	GABARAPL2	NM_007285	TSS200			16:74157211-74158474	16:75599568-75601216	Promoter_Associated	-0.447624	-0.393912	-6.2723	5.69091e-09	2.60806e-07	10.1687
cg13139020	chr6	3000058	-	cg13139020	rs188626257	0.1007	NA	NA	NA	NA	chr6:3000069-3000520	N_Shore	NQO2	NM_000904	TSS200			6:2944335-2945666	6:2998140-3000716	Promoter_Associated	-0.447453	-1.53247	-3.37624	0.000987817	0.00477328	-1.32228
cg08439930	chr16	51185060	-	cg08439930	NA	NA	NA	NA	NA	NA	chr16:51183699-51188763	Island	SALL1;SALL1	NM_001127892;NM_002968	TSS1500;Body			16:49742460-49742649			-0.44729	-1.34281	-6.92867	2.19484e-10	1.68028e-08	13.3209
cg15392364	chr1	206976689	-	cg15392364	NA	NA	NA	NA	NA	NA		OpenSea	IL19	NM_153758	Body				1:206976331-206977234	Promoter_Associated	-0.447145	1.26292	-5.18648	8.69551e-07	1.54801e-05	5.32541
cg00704633	chr4	170948762	-	cg00704633	NA	NA	NA	NA	NA	NA	chr4:170948486-170948908	Island	MFAP3L	NM_021647	TSS1500			4:171185023-171185517			-0.447139	-1.96666	-7.40414	1.91734e-11	2.05106e-09	15.6868
cg23549972	chr3	58389654	+	cg23549972	NA	NA	NA	NA	NA	NA		OpenSea	PXK	NM_017771	Body		TRUE				-0.447127	1.22171	-5.39093	3.50809e-07	7.50498e-06	6.19627
cg21789849	chr3	107809536	+	cg21789849	NA	NA	NA	NA	NA	NA	chr3:107809375-107810543	Island	CD47;CD47;CD47	NM_198793;NM_001025079;NM_001777	Body;Body;Body			3:109291899-109293252	3:107809497-107809564	Promoter_Associated	-0.446909	0.729126	-6.85124	3.24522e-10	2.34307e-08	12.9417
cg15375424	chr5	131823451	-	cg15375424	NA	NA	NA	NA	NA	NA	chr5:131825842-131826935	N_Shelf	IRF1	NM_002198	Body						-0.446905	1.09834	-5.69963	8.59228e-08	2.43889e-06	7.54919
cg05830473	chr16	58718573	-	cg05830473	NA	NA	NA	NA	NA	NA	chr16:58718309-58718703	Island	SLC38A7	NM_018231	5'UTR			16:57275953-57276269	16:58717254-58719146	Promoter_Associated	-0.446886	-1.87242	-6.8572	3.14912e-10	2.28468e-08	12.9709
cg24500358	chr17	48450523	+	cg24500358	rs115623988	0.010936	NA	NA	NA	NA	chr17:48450456-48450665	Island	EME1;MRPL27;EME1	NM_001166131;NM_016504;NM_152463	TSS200;1stExon;TSS200			17:45805244-45805694	17:48449966-48450820	Promoter_Associated	-0.446772	-1.85772	-6.3608	3.69994e-09	1.81822e-07	10.585
cg06905970	chr19	41222748	+	cg06905970	NA	NA	NA	NA	NA	NA	chr19:41222598-41223162	Island	ADCK4;ADCK4;ITPKC	NM_024876;NM_024876;NM_025194	1stExon;5'UTR;TSS1500			19:45914371-45915246	19:41222178-41223998	Promoter_Associated	-0.446702	-1.27758	-9.17379	1.47024e-15	5.36572e-13	24.9051
cg26922444	chr6	24911204	-	cg26922444	NA	NA	NA	NA	NA	NA	chr6:24910626-24911285	Island	FAM65B	NM_014722	TSS200	DMR		6:25018606-25019551	6:24910730-24911608	Promoter_Associated	-0.446488	-1.7475	-8.14082	3.95507e-13	7.02191e-11	19.4596
cg04830857	chr3	156394724	+	cg04830857	NA	NA	NA	NA	NA	NA	chr3:156391811-156393607	S_Shore	TIPARP;LOC100287227	NM_015508;NR_027954	5'UTR;TSS1500	RDMR					-0.446372	1.92025	-6.23228	6.90772e-09	3.06053e-07	9.98136
cg05595469	chr21	47845863	+	cg05595469	NA	NA	NA	NA	NA	NA	chr21:47845595-47845864	Island	PCNT	NM_006031	Body			21:46669457-46670310	21:47845617-47845901	Unclassified_Cell_type_specific	-0.446245	1.64137	-6.69271	7.18705e-10	4.60427e-08	12.1712
cg02929209	chr4	53588595	-	cg02929209	NA	NA	NA	NA	NA	NA	chr4:53588189-53588735	Island					TRUE	4:53282947-53283585	4:53587873-53589048	Promoter_Associated	-0.44602	-1.19129	-10.1307	7.51649e-18	5.59199e-15	30.0425
cg02429398	chr16	53536813	+	cg02429398	NA	NA	NA	NA	NA	NA	chr16:53536501-53537685	Island	AKTIP;AKTIP	NM_001012398;NM_022476	5'UTR;5'UTR			16:52093919-52095243			-0.44597	-1.97061	-6.84187	3.40208e-10	2.44086e-08	12.896
cg21341821	chr10	587122	+	cg21341821	NA	NA	NA	NA	NA	NA		OpenSea	DIP2C	NM_014974	Body		TRUE				-0.445774	1.93297	-3.54504	0.00055856	0.00298062	-0.794393
cg22449766	chr1	204381035	+	cg22449766	NA	NA	NA	NA	NA	NA	chr1:204380313-204381159	Island	PPP1R15B	NM_032833	TSS200			1:202646785-202648028	1:204380016-204381515	Unclassified	-0.445648	-1.56485	-5.01108	1.86411e-06	2.85263e-05	4.59534
cg27486585	chr6	30459595	-	cg27486585	NA	NA	NA	NA	NA	NA	chr6:30457369-30458175	S_Shore	HLA-E	NM_005516	Body						-0.445632	0.848355	-6.56804	1.33567e-09	7.76993e-08	11.571
cg22700691	chr10	21814388	-	cg22700691	NA	NA	NA	NA	NA	NA	chr10:21814786-21815716	N_Shore	C10orf140	NM_207371	5'UTR			10:21854284-21854473	10:21814386-21814599	Promoter_Associated	-0.445301	-1.14488	-5.01531	1.83041e-06	2.80955e-05	4.61279
cg20610654	chr8	1708447	+	cg20610654	NA	NA	NA	NA	NA	NA	chr8:1711234-1712654	N_Shelf						8:1695773-1696002	8:1708217-1708680	Unclassified_Cell_type_specific	-0.445282	1.044	-6.53503	1.57254e-09	8.90973e-08	11.4129
cg09386807	chr3	50375496	-	cg09386807	NA	NA	NA	NA	NA	NA	chr3:50374264-50375629	Island	RASSF1;RASSF1;RASSF1;RASSF1	NM_170713;NM_170714;NM_007182;NM_170712	TSS1500;Body;Body;5'UTR			3:50349304-50350593	3:50374084-50375785	Promoter_Associated	-0.445252	-1.30085	-7.21986	4.96692e-11	4.68649e-09	14.7626
cg06217769	chr17	2126306	+	cg06217769	NA	NA	NA	NA	NA	NA		OpenSea	SMG6;SMG6	NM_017575;NM_001170957	Body;Body		TRUE		17:2126201-2126585	Unclassified_Cell_type_specific	-0.445061	1.54817	-6.68243	7.56505e-10	4.81121e-08	12.1216
cg01307507	chr17	77751480	-	cg01307507	NA	NA	NA	NA	NA	NA	chr17:77751378-77751673	Island	CBX2;CBX2	NM_005189;NM_032647	TSS1500;TSS1500			17:75365924-75367152	17:77750747-77752072	Unclassified	-0.445048	-1.72659	-6.17931	8.91972e-09	3.79659e-07	9.73434
cg09446908	chr22	19512320	+	cg09446908	NA	NA	NA	NA	NA	NA	chr22:19510871-19512254	S_Shore	CLDN5;CLDN5;CLDN5	NM_001130861;NM_001130861;NM_003277	1stExon;5'UTR;5'UTR	DMR					-0.44503	-1.2216	-6.47015	2.16518e-09	1.16366e-07	11.1034
cg21805118	chr12	122712153	+	cg21805118	NA	NA	NA	NA	NA	NA	chr12:122710054-122711371	S_Shore	DIABLO;DIABLO;DIABLO;DIABLO	NM_138929;NM_019887;NR_024601;NR_024600	TSS200;TSS200;TSS200;TSS200			12:121278017-121278107			-0.44503	1.0272	-6.94337	2.03729e-10	1.57634e-08	13.3932
cg09453076	chr2	235406275	+	cg09453076	NA	NA	NA	NA	NA	NA	chr2:235404502-235406541	Island	ARL4C	NM_005737	TSS1500	DMR		2:235069078-235071448	2:235405028-235406635	Promoter_Associated_Cell_type_specific	-0.444897	-1.12054	-3.94272	0.000135257	0.000925232	0.530162
cg01860774	chr14	64969374	-	cg01860774	rs2198347	0.195023	NA	NA	NA	NA	chr14:64969967-64972180	N_Shore	ZBTB25	NM_006977	5'UTR				14:64969063-64969497	Promoter_Associated	-0.444886	1.42645	-5.67065	9.8227e-08	2.71905e-06	7.42033
[truncated: 7,315 more rows]

## Sheet: Table S3.2
DMS	chr	pos	strand	Name	Probe_rs	Probe_maf	CpG_rs	CpG_maf	SBE_rs	SBE_maf	Islands_Name	Relation_to_Island	UCSC_RefGene_Name	UCSC_RefGene_Accession	UCSC_RefGene_Group	DMR	Enhancer	HMM_Island	Regulatory_Feature_Name	Regulatory_Feature_Group	logFC	AveExpr	t	P.Value	adj.P.Value	B
[truncated: 4,631 more rows]

[truncated: 16 more sheets: Table S3.3, Table S3.4, Table S4.1, Table S4.2, Table S4.3, Table S5.1, Table S5.2, Table S5.3, Table S6.1, Table S6.2, Table S7.1, Table S7.2, Table S7.3, Table S7.4, Table S7.5, Table S7.6]
